# Supplementary material for: Pan-genomic insights into RLK family evolution and adaptation in Dioscorea alata
Source: Research Square preprint supplement (doi:10.21203/rs.3.rs-7198655/v1), 2025-07-29
Supplement: Supplementary file 1 [file 58566683af4c1ab211ec02c0.xlsx]

## Sheet: TableS1
Accession	Name	Chr	Type	KD_count	ECD	Subfamily	pvalue
ZSDa005	ZSDa005_Chr10_gene_39280_mRNA	Chr10	RLK	1	LRR_8#LRR_1	LRR-Xa	4.7e-96
ZSDa005	ZSDa005_Chr3_gene_332390_mRNA	Chr3	RLK	1	LRRNT_2#LRR_8#LRR_8#LRR_4#LRR_8#LRR_4#LRR_1#LRR_8#LRR_8#LRR_8	LRR-XI-1	1.6e-99
ZSDa005	ZSDa005_Chr13_gene_294250_mRNA	Chr13	RLK	1	Lectin_legB	L-LEC	1.1e-112
ZSDa005	ZSDa005_Chr8_gene_121620_mRNA	Chr8	RLK	1	LRRNT_2#LRR_1#LRR_8	LRR-III	6.5e-82
ZSDa005	ZSDa005_Chr15_gene_275460_mRNA	Chr15	RLK	1	B_lectin#S_locus_glycop#PAN_2	DLSV	2.5e-121
ZSDa005	ZSDa005_Chr8_gene_133810_mRNA	Chr8	RLK	1	Lectin_legB	L-LEC	3.9e-107
ZSDa005	ZSDa005_Chr4_gene_8190_mRNA	Chr4	RLK_WE	1	None	RLCK-XI	2.7e-114
ZSDa005	ZSDa005_Chr17_gene_57940_mRNA	Chr17	RLK	1	LRRNT_2#LRR_8#LRR_8#LRR_8#LRR_8#LRR_8#LRR_8#LRR_1#LRR_8	LRR-XII-1	6.1e-121
ZSDa005	ZSDa005_Chr5_gene_96870_mRNA	Chr5	RLK	1	LRRNT_2#LRR_8#LRR_8#LRR_8	LRR-III	3.3e-94
ZSDa005	ZSDa005_Chr9_gene_29830_mRNA	Chr9	RLK_WE	1	None	RLCK-X	1.7e-148
ZSDa005	ZSDa005_Chr20_gene_108650_mRNA	Chr20	RLK	1	LRR_8#LRR_1#LRR_8#LRR_1	LRR-XI-1	8.5e-112
ZSDa005	ZSDa005_Chr19_gene_239330_mRNA	Chr19	RLK	1	LRRNT_2#LRR_8#LRR_4#LRR_1	LRR-III	3e-115
ZSDa005	ZSDa005_Chr15_gene_260430_mRNA	Chr15	RLK	1	B_lectin#S_locus_glycop#PAN_2	DLSV	7.8e-127
ZSDa005	ZSDa005_Chr2_gene_144610_mRNA	Chr2	RLK	1	LRRNT_2#LRR_4#LRR_8#LRR_8#LRR_8#LRR_1#LRR_8#LRR_1#LRR_1#LRR_8	LRR-XI-1	4.7e-84
ZSDa005	ZSDa005_Chr4_gene_7020_mRNA	Chr4	RLK	1	LRRNT_2#LRR_4#LRR_4#LRR_8#LRR_4#LRR_8#LRR_8#LRR_1#Island#LRR_1#LRR_8	LRR-Xb-1	6.5e-123
ZSDa005	ZSDa005_Chr4_gene_2670_mRNA	Chr4	RLK	1	LRRNT_2#LRR_8#LRR_8#LRR_8#LRRNT_2#LRR_8	LRR-IX	4.6e-151
ZSDa005	ZSDa005_Chr15_gene_260320_mRNA	Chr15	RLK	1	B_lectin#S_locus_glycop#PAN_2	SD-2b	1.4e-119
ZSDa005	ZSDa005_Chr8_gene_130450_mRNA	Chr8	RLK_WE	1	None	RLCK-Os	7.7e-116
ZSDa005	ZSDa005_Chr16_gene_289380_mRNA	Chr16	RLK	1	GUB_WAK_bind	LRK10L-2	2.6e-128
ZSDa005	ZSDa005_Chr13_gene_316070_mRNA	Chr13	RLK	1	Lectin_legB	L-LEC	1.9e-117
ZSDa005	ZSDa005_Chr15_gene_260450_mRNA	Chr15	RLK	1	B_lectin#S_locus_glycop#PAN_2	DLSV	8.3e-126
ZSDa005	ZSDa005_Chr5_gene_157990_mRNA	Chr5	RLK	1	RCC1_2#RCC1_2#RCC1_2#RCC1_2#RCC1_2#TNFR_c6	CR4L	3e-108
ZSDa005	ZSDa005_Chr8_gene_135740_mRNA	Chr8	RLK	1	Lectin_legB	L-LEC	1.1e-118
ZSDa005	ZSDa005_Chr8_gene_121570_mRNA	Chr8	RLK	1	LRRNT_2#LRR_8	LRR-II	1.1e-146
ZSDa005	ZSDa005_Chr17_gene_57030_mRNA	Chr17	RLK	1	LRRNT_2#LRR_8#LRR_8#LRR_8#LRR_1#LRR_1#LRR_4#LRR_8	LRR-XI-1	2.2e-106
ZSDa005	ZSDa005_Chr19_gene_250350_mRNA	Chr19	RLK	1	LRRNT_2#LRR_1#LRR_8#LRR_1#LRR_8#LRR_8#LRR_8#LRR_4#LRR_8#LRR_8#LRR_8#LRR_8	LRR-XII-1	1e-79
ZSDa005	ZSDa005_Chr5_gene_99890_mRNA	Chr5	RLK	1	LRRNT_2#LRR_1#LRR_8	LRR-II	5.1e-156
ZSDa005	ZSDa005_Chr17_gene_56610_mRNA	Chr17	RLK	1	B_lectin#S_locus_glycop#PAN_1	SD-2b	5.3e-99
ZSDa005	ZSDa005_Chr2_gene_152430_mRNA	Chr2	RLK	1	LRRNT_2#LRR_8#LRR_4#LRR_4#LRR_8#LRR_1#LRR_8#LRR_8#LRR_1#LRR_8	LRR-XI-1	3e-87
ZSDa005	ZSDa005_Chr18_gene_82570_mRNA	Chr18	RLK	1	Malectin_like#LRRNT_2#LRR_4#LRR_8	LRR-I-1	3.1e-113
ZSDa005	ZSDa005_Chr12_gene_226790_mRNA	Chr12	RLK	1	LRRNT_2#LRR_8	LRR-VI-2	8.1e-109
ZSDa005	ZSDa005_Chr19_gene_242470_mRNA	Chr19	RLK	1	LRRNT_2#LRR_8#LRR_8#LRR_8#LRR_8#LRR_8	LRR-Xb-1	4.1e-127
ZSDa005	ZSDa005_Chr15_gene_261750_mRNA	Chr15	RLK	1	B_lectin#S_locus_glycop#PAN_2	DLSV	3.3e-126
ZSDa005	ZSDa005_Chr15_gene_276420_mRNA	Chr15	RLK	1	LRRNT_2#LRR_8	LRR-III	4.4e-76
ZSDa005	ZSDa005_Chr16_gene_289370_mRNA	Chr16	RLK	2	GUB_WAK_bind	LRK10L-2	2.2e-94
ZSDa005	ZSDa005_Chr4_gene_11130_mRNA	Chr4	RLK	1	LRR_8#LRR_8#LRR_8	LRR-IX	8.4e-123
ZSDa005	ZSDa005_Chr4_gene_5720_mRNA	Chr4	RLK	1	GUB_WAK_bind#WAK_assoc	WAK_LRK10L-1	1.7e-128
ZSDa005	ZSDa005_Chr15_gene_267480_mRNA	Chr15	RLK	1	B_lectin#S_locus_glycop#PAN_2	DLSV	3.3e-124
ZSDa005	ZSDa005_Chr7_gene_195010_mRNA	Chr7	RLK_WE	1	None	RLCK-IXa	9.6e-121
ZSDa005	ZSDa005_Chr9_gene_27080_mRNA	Chr9	RLK	1	LRRNT_2#LRR_8#LRR_8#LRR_8#LRR_8	LRR-VIII-1	1.5e-132
ZSDa005	ZSDa005_Chr17_gene_57860_mRNA	Chr17	RLK	1	LRRNT_2#LRR_8#LRR_8#LRR_8#LRR_4#LRR_1#LRR_8#LRR_4#LRR_8	LRR-XII-1	2e-117
ZSDa005	ZSDa005_Chr8_gene_127600_mRNA	Chr8	RLK	1	Stress-antifung#Stress-antifung	DLSV	1.2e-123
ZSDa005	ZSDa005_Chr2_gene_148590_mRNA	Chr2	RLK_WE	1	None	RLCK-IXa	1.4e-62
ZSDa005	ZSDa005_Chr13_gene_315630_mRNA	Chr13	RLK	1	Lectin_legB	L-LEC	2.6e-97
ZSDa005	ZSDa005_Chr5_gene_166670_mRNA	Chr5	RLK	1	LRRNT_2#LRR_8#LRR_4#LRR_8#LRRNT_2#LRR_4	LRR-IX	7.8e-166
ZSDa005	ZSDa005_Chr13_gene_294070_mRNA	Chr13	RLK	1	Lectin_legB	L-LEC	6.3e-117
ZSDa005	ZSDa005_Chr14_gene_177230_mRNA	Chr14	RLK	1	LRRNT_2#LRR_8#LRR_1#LRR_8#LRR_4#LRR_8#LRR_4#LRR_8#LRR_1#LRR_8#LRR_8#LRR_8	LRR-VII-3	9.4e-114
ZSDa005	ZSDa005_Chr5_gene_158700_mRNA	Chr5	RLK	1	LRRNT_2#LRR_8#LRR_8#LRR_8#LRR_4#LRR_1#LRR_8#LRR_4#LRR_8	LRR-XI-1	1.4e-82
ZSDa005	ZSDa005_Chr19_gene_238140_mRNA	Chr19	RLK	1	LRR_8#LRR_4#LRR_8#Malectin	DLSV	2.7e-112
ZSDa005	ZSDa005_Chr17_gene_64630_mRNA	Chr17	RLK	1	LRRNT_2#LRR_8#LRR_1#LRR_8#LRR_8#LRR_8#LRR_8#LRR_8#LRR_1	LRR-XII-1	4.4e-80
ZSDa005	ZSDa005_Chr17_gene_65960_mRNA	Chr17	RLK	1	LRRNT_2#LRR_8#LRR_8#LRR_4#LRR_1#LRR_4#LRR_8	LRR-XII-1	1.8e-95
ZSDa005	ZSDa005_Chr8_gene_130420_mRNA	Chr8	RLK_WE	2	None	RLCK-Os	8e-116
ZSDa005	ZSDa005_Chr19_gene_250340_mRNA	Chr19	RLK	1	LRRNT_2#LRR_1#LRR_8#LRR_1#LRR_8#LRR_8#LRR_8#LRR_4#LRR_8#LRR_8#LRR_8#LRR_4	LRR-XII-1	7.1e-79
ZSDa005	ZSDa005_Chr16_gene_288030_mRNA	Chr16	RLK_WE	1	None	RLCK-XI	1.1e-120
ZSDa005	ZSDa005_Chr19_gene_248670_mRNA	Chr19	RLK_WE	1	None	RLCK-IXa	6.9e-112
ZSDa005	ZSDa005_Chr16_gene_277530_mRNA	Chr16	RLK	1	Lectin_legB	L-LEC	3.9e-108
ZSDa005	ZSDa005_Chr19_gene_241820_mRNA	Chr19	RLK	1	Malectin_like	CrRLK1L-1	2.4e-136
ZSDa005	ZSDa005_Chr5_gene_93480_mRNA	Chr5	RLK_WE	1	None	SD-2b	6.7e-47
ZSDa005	ZSDa005_Chr5_gene_95580_mRNA	Chr5	RLK	1	LRRNT_2#LRR_8#LRR_4#LRR_8#LRR_8#LRR_8#LRR_1#LRR_8#LRR_1#LRR_8	LRR-XI-1	2.7e-113
ZSDa005	ZSDa005_Chr15_gene_261970_mRNA	Chr15	RLK	1	LRRNT_2#LRR_8	LRR-XIIIa	3.3e-129
ZSDa005	ZSDa005_Chr15_gene_269400_mRNA	Chr15	RLK	1	Stress-antifung#Stress-antifung	DLSV	5.3e-119
ZSDa005	ZSDa005_Chr20_gene_113010_mRNA	Chr20	RLK	1	LysM	LysM	8.2e-104
ZSDa005	ZSDa005_Chr20_gene_106390_mRNA	Chr20	RLK	1	LRRNT_2#LRR_8#LRR_8#LRR_8#LRR_8#LRR_8#LRR_8#LRR_1	LRR-XI-1	7.7e-102
ZSDa005	ZSDa005_Chr2_gene_144090_mRNA	Chr2	RLK	1	LRRNT_2#LRR_8#LRR_4#LRR_4#LRR_4#LRR_1#LRR_4#LRR_8#LRR_8#LRR_8	LRR-XI-1	1.7e-88
ZSDa005	ZSDa005_Chr8_gene_127260_mRNA	Chr8	RLK	1	B_lectin#S_locus_glycop#PAN_2	SD-2b	5.1e-122
ZSDa005	ZSDa005_Chr19_gene_245020_mRNA	Chr19	RLK	1	LRRNT_2#LRR_8#LRR_8	LRR-II	1.6e-148
ZSDa005	ZSDa005_Chr2_gene_152350_mRNA	Chr2	RLK	1	LRRNT_2#LRR_4#LRR_4#LRR_8#LRR_1#LRR_4#LRR_8#LRR_8#LRR_4#LRR_8#LRR_4#LRR_1#LRR_8	LRR-XI-1	6.7e-91
ZSDa005	ZSDa005_Chr5_gene_167160_mRNA	Chr5	RLK	1	LRRNT_2#LRR_1#LRR_8	LRR-II	1.8e-156
ZSDa005	ZSDa005_Chr5_gene_89710_mRNA	Chr5	RLK_WE	1	None	SD-2b	9.6e-108
ZSDa005	ZSDa005_Chr16_gene_289450_mRNA	Chr16	RLK	1	GUB_WAK_bind	LRK10L-2	1.5e-127
ZSDa005	ZSDa005_Chr13_gene_294150_mRNA	Chr13	RLK	1	Lectin_legB	L-LEC	2.9e-117
ZSDa005	ZSDa005_Chr13_gene_294090_mRNA	Chr13	RLK	1	Lectin_legB	L-LEC	1.4e-116
ZSDa005	ZSDa005_Chr5_gene_97330_mRNA	Chr5	RLK	1	Rhabdo_ncap_2	LRK10L-2	5.3e-128
ZSDa005	ZSDa005_Chr16_gene_289410_mRNA	Chr16	RLK	1	GUB_WAK_bind	LRK10L-2	7.4e-131
ZSDa005	ZSDa005_Chr4_gene_5410_mRNA	Chr4	RLK	1	Stress-antifung#Stress-antifung#Stress-antifung#Stress-antifung	DLSV	1.2e-119
ZSDa005	ZSDa005_Chr17_gene_57070_mRNA	Chr17	RLK	1	LRRNT_2#LRR_8#LRR_8#LRR_8#LRR_1#LRR_4#LRR_8#LRR_1#LRR_1	LRR-XI-1	6e-104
ZSDa005	ZSDa005_Chr5_gene_96990_mRNA	Chr5	RLK	1	LRRNT_2#LRR_8#LRR_4	LRR-III	3.6e-102
ZSDa005	ZSDa005_Chr2_gene_152500_mRNA	Chr2	RLK	1	LRRNT_2#LRR_8#LRR_1#LRR_8#LRR_8#LRR_8#LRR_4#LRR_8	LRR-XI-1	9.2e-91
ZSDa005	ZSDa005_Chr3_gene_327030_mRNA	Chr3	RLK_WE	1	None	DLSV	1e-111
ZSDa005	ZSDa005_Chr15_gene_267450_mRNA	Chr15	RLK	1	B_lectin#S_locus_glycop#PAN_2	DLSV	1.6e-121
ZSDa005	ZSDa005_Chr17_gene_56450_mRNA	Chr17	RLK	1	LRR_4#LRR_8	LRR-II	1.2e-137
ZSDa005	ZSDa005_Chr11_gene_220580_mRNA	Chr11	RLK	1	LRRNT_2#LRR_8	LRR-VI-2	4.1e-101
ZSDa005	ZSDa005_Chr8_gene_130480_mRNA	Chr8	RLK_WE	1	None	RLCK-Os	2.7e-149
ZSDa005	ZSDa005_Chr19_gene_244820_mRNA	Chr19	RLK	1	LRRNT_2#LRR_8#LRR_1#LRR_4	LRR-III	2.4e-105
ZSDa005	ZSDa005_Chr5_gene_162810_mRNA	Chr5	RLK	1	GUB_WAK_bind#WAK_assoc	WAK_LRK10L-1	7.5e-129
ZSDa005	ZSDa005_Chr8_gene_127280_mRNA	Chr8	RLK	1	B_lectin#S_locus_glycop#PAN_2	DLSV	2.1e-127
ZSDa005	ZSDa005_Chr5_gene_158710_mRNA	Chr5	RLK	1	RCC1_2#RCC1_2#RCC1_2#RCC1_2	CR4L	9.7e-106
ZSDa005	ZSDa005_Chr16_gene_289490_mRNA	Chr16	RLK	1	GUB_WAK_bind	LRK10L-2	4.8e-128
ZSDa005	ZSDa005_Chr10_gene_46140_mRNA	Chr10	RLK	1	LRRNT_2#LRR_8#LRR_8	LRR-III	6.3e-90
ZSDa005	ZSDa005_Chr4_gene_20240_mRNA	Chr4	RLK	1	EGF_CA	WAK	3.6e-106
ZSDa005	ZSDa005_Chr2_gene_152390_mRNA	Chr2	RLK	1	LRR_8#LRR_8#LRR_8#LRR_1#LRR_4#LRR_1#LRR_1#LRR_8#LRR_4#LRR_4#LRR_4#LRR_4#LRR_4#LRR_8#LRR_1#LRR_8#LRR_8#LRR_8	LRR-XI-1	3.1e-39
ZSDa005	ZSDa005_Chr19_gene_241750_mRNA	Chr19	RLK	1	LysM	LysM	2.1e-81
ZSDa005	ZSDa005_Chr20_gene_107150_mRNA	Chr20	RLK	1	LRR_8#LRR_8#LRR_4#Malectin	DLSV	1.2e-111
ZSDa005	ZSDa005_Chr5_gene_102180_mRNA	Chr5	RLK	1	LRR_1#LRR_4#LRR_4#LRR_1	LRR-V	2.5e-94
ZSDa005	ZSDa005_Chr20_gene_107160_mRNA	Chr20	RLK	1	LRR_8#LRR_4#LRR_1#Malectin	DLSV	1.2e-110
ZSDa005	ZSDa005_Chr8_gene_117060_mRNA	Chr8	RLK	1	B_lectin#S_locus_glycop#PAN_2	SD-2b	5.3e-125
ZSDa005	ZSDa005_Chr14_gene_173480_mRNA	Chr14	RLK	1	SPARK	URK-1	3.7e-148
ZSDa005	ZSDa005_Chr20_gene_107110_mRNA	Chr20	RLK	1	LRR_8#LRR_8#LRR_8#Malectin	DLSV	7.6e-105
ZSDa005	ZSDa005_Chr20_gene_107030_mRNA	Chr20	RLK	1	LRR_8#LRR_8#LRR_8#Malectin	DLSV	6.5e-107
ZSDa005	ZSDa005_Chr5_gene_164290_mRNA	Chr5	RLK	1	LRRNT_2#LRR_8#LRR_8#LRR_8#LRR_4#LRR_8#LRR_8#LRR_8#LRR_8#LRR_8#LRR_8	LRR-Xb-1	8.6e-125
ZSDa005	ZSDa005_Chr5_gene_162310_mRNA	Chr5	RLK_WE	1	None	PERK-1	2.3e-156
ZSDa005	ZSDa005_Chr5_gene_160860_mRNA	Chr5	RLK_WE	1	None	Extensin	1e-150
ZSDa005	ZSDa005_Chr13_gene_294220_mRNA	Chr13	RLK	1	Lectin_legB	L-LEC	2e-115
ZSDa005	ZSDa005_Chr15_gene_270430_mRNA	Chr15	RLK	1	Lectin_legB	L-LEC	2e-119
ZSDa005	ZSDa005_Chr17_gene_65940_mRNA	Chr17	RLK	1	LRR_8#LRR_4#LRR_1#LRR_8#LRR_8	LRR-XII-1	1.2e-123
ZSDa005	ZSDa005_Chr15_gene_270440_mRNA	Chr15	RLK	1	Lectin_legB	L-LEC	7.3e-119
ZSDa005	ZSDa005_Chr18_gene_72200_mRNA	Chr18	RLK	1	LRRNT_2#LRR_8#LRR_8#LRRNT_2#LRR_8	LRR-IX	3.4e-150
ZSDa005	ZSDa005_Chr7_gene_198230_mRNA	Chr7	RLK	1	B_lectin#S_locus_glycop#PAN_2	SD-2b	1.2e-101
ZSDa005	ZSDa005_Chr19_gene_250860_mRNA	Chr19	RLK	1	SPARK	RKF3	3.8e-108
ZSDa005	ZSDa005_Chr16_gene_289430_mRNA	Chr16	RLK	1	GUB_WAK_bind	LRK10L-2	5.3e-130
ZSDa005	ZSDa005_Chr15_gene_260340_mRNA	Chr15	RLK	1	B_lectin#S_locus_glycop#PAN_2	SD-2b	1.4e-123
ZSDa005	ZSDa005_Chr7_gene_198480_mRNA	Chr7	RLK	1	GUB_WAK_bind#WAK#EGF#EGF_CA	WAK	7.9e-101
ZSDa005	ZSDa005_Chr15_gene_260420_mRNA	Chr15	RLK	1	B_lectin#S_locus_glycop#PAN_2	DLSV	5e-123
ZSDa005	ZSDa005_Chr15_gene_263580_mRNA	Chr15	RLK	1	B_lectin#S_locus_glycop#PAN_2	SD-2b	2.5e-116
ZSDa005	ZSDa005_Chr2_gene_152140_mRNA	Chr2	RLK	1	LRR_8#LRR_4#LRR_8#LRR_4#LRR_8#LRR_1#LRR_4#LRR_8#LRR_8#LRR_8#LRR_4	LRR-XI-1	2.4e-89
ZSDa005	ZSDa005_Chr14_gene_186040_mRNA	Chr14	RLK_WE	1	None	IRE1	2e-139
ZSDa005	ZSDa005_Chr4_gene_6150_mRNA	Chr4	RLK	1	Malectin	DLSV	7.4e-108
ZSDa005	ZSDa005_Chr13_gene_316100_mRNA	Chr13	RLK	1	Lectin_legB	L-LEC	5.9e-116
ZSDa005	ZSDa005_Chr8_gene_131720_mRNA	Chr8	RLK	1	LRRNT_2#LRR_1#LRR_8	LRR-III	7.5e-42
ZSDa005	ZSDa005_Chr5_gene_95180_mRNA	Chr5	RLK	1	LRRNT_2#LRR_8	LRR-VI-2	2.3e-108
ZSDa005	ZSDa005_Chr13_gene_294180_mRNA	Chr13	RLK	1	Lectin_legB	L-LEC	3.4e-113
ZSDa005	ZSDa005_Chr2_gene_144080_mRNA	Chr2	RLK	1	LRRNT_2#LRR_8#LRR_8#LRR_1#LRR_8#LRR_1#LRR_8#LRR_8#LRR_4#LRR_1#LRR_8	LRR-XI-1	4.9e-66
ZSDa005	ZSDa005_Chr15_gene_275770_mRNA	Chr15	RLK	1	Malectin_like	CrRLK1L-1	1.5e-150
ZSDa005	ZSDa005_Chr7_gene_204620_mRNA	Chr7	RLK	1	Stress-antifung	DLSV	4.6e-124
ZSDa005	ZSDa005_Chr14_gene_183460_mRNA	Chr14	RLK	1	LRRNT_2#LRR_4#LRR_4#LRR_1#LRR_8#LRR_1#LRR_8#LRR_8	LRR-XI-1	3.9e-101
ZSDa005	ZSDa005_Chr15_gene_269220_mRNA	Chr15	RLK	1	B_lectin#S_locus_glycop#PAN_2	DLSV	8.4e-121
ZSDa005	ZSDa005_Chr14_gene_177870_mRNA	Chr14	RLK_WE	1	None	RLCK-IXa	8.7e-79
ZSDa005	ZSDa005_Chr4_gene_2360_mRNA	Chr4	RLK	1	WAK_assoc	LRK10L-2	1.5e-118
ZSDa005	ZSDa005_Chr15_gene_267220_mRNA	Chr15	RLK	1	B_lectin#PAN_2	DLSV	1.6e-120
ZSDa005	ZSDa005_Chr8_gene_121750_mRNA	Chr8	RLK	1	LRR_1#LRR_8	LRR-III	6.5e-52
ZSDa005	ZSDa005_Chr15_gene_265990_mRNA	Chr15	RLK	1	LRRNT_2#LRR_8#LRR_8#LRR_8#LRR_1#LRR_4#LRR_6#LRR_8	LRR-III	2.6e-83
ZSDa005	ZSDa005_Chr2_gene_152170_mRNA	Chr2	RLK	1	LRR_1#LRR_8#LRR_8#LRR_8#LRR_1#LRR_8	LRR-XI-1	3.6e-88
ZSDa005	ZSDa005_Chr7_gene_187560_mRNA	Chr7	RLK	1	B_lectin#S_locus_glycop	SD-2b	6.4e-103
ZSDa005	ZSDa005_Chr20_gene_112960_mRNA	Chr20	RLK	1	LRRNT_2#LRR_1#LRR_8#LRR_8#LRR_8#LRR_1#LRR_8#LRR_4	LRR-XII-1	1.3e-120
ZSDa005	ZSDa005_Chr2_gene_144060_mRNA	Chr2	RLK	1	LRRNT_2#LRR_1#LRR_8#LRR_8#LRR_8#LRR_1#LRR_8#LRR_8#LRR_8#LRR_4#LRR_8	LRR-XI-1	3.7e-89
ZSDa005	ZSDa005_Chr18_gene_74190_mRNA	Chr18	RLK	1	LRRNT_2#LRR_8	LRR-VI-2	4.8e-98
ZSDa005	ZSDa005_Chr8_gene_127190_mRNA	Chr8	RLK	1	B_lectin#S_locus_glycop#PAN_2	SD-2b	1.3e-119
ZSDa005	ZSDa005_Chr10_gene_44540_mRNA	Chr10	RLK	1	LRR_4#LRR_8	LRR-VII-1	6.4e-126
ZSDa005	ZSDa005_Chr8_gene_127560_mRNA	Chr8	RLK	1	Stress-antifung#Stress-antifung	DLSV	5.8e-124
ZSDa005	ZSDa005_Chr15_gene_261740_mRNA	Chr15	RLK	1	B_lectin#S_locus_glycop#PAN_2	DLSV	3.7e-112
ZSDa005	ZSDa005_Chr8_gene_127570_mRNA	Chr8	RLK	1	Stress-antifung#Stress-antifung	DLSV	6.6e-123
ZSDa005	ZSDa005_Chr5_gene_164150_mRNA	Chr5	RLK_WE	1	None	URK-2	8.3e-99
ZSDa005	ZSDa005_Chr4_gene_1440_mRNA	Chr4	RLK	1	LRRNT_2#LRR_8#LRR_8#LRR_8#LRR_8#LRR_1#LRR_1#LRR_8#LRR_1#LRR_1#LRR_4	LRR-XI-1	1.6e-101
ZSDa005	ZSDa005_Chr5_gene_163510_mRNA	Chr5	RLK	1	LRR_8#LRR_8#LRR_8#LRR_1#LRR_8#LRR_8#LRR_1#LRR_8	LRR-XII-1	5.7e-116
ZSDa005	ZSDa005_Chr5_gene_160480_mRNA	Chr5	RLK	1	LRRNT_2#LRR_8#LRR_4#LRR_4#LRR_8#LRR_8#LRR_4#LRR_1#LRR_8#LRR_8#LRR_1	LRR-XI-1	1.4e-110
ZSDa005	ZSDa005_Chr16_gene_289360_mRNA	Chr16	RLK	1	GUB_WAK_bind	LRK10L-2	2.2e-130
ZSDa005	ZSDa005_Chr16_gene_285470_mRNA	Chr16	RLK	1	GUB_WAK_bind	LRK10L-2	8.5e-120
ZSDa005	ZSDa005_Chr5_gene_91900_mRNA	Chr5	RLK	1	LRRNT_2#LRR_4#LRR_8#LRR_1#LRR_4	LRR-VIII-1	1.4e-129
ZSDa005	ZSDa005_Chr14_gene_176700_mRNA	Chr14	RLK	1	GUB_WAK_bind	URK-3	6.6e-49
ZSDa005	ZSDa005_Chr17_gene_56640_mRNA	Chr17	RLK	1	B_lectin#S_locus_glycop#PAN_2	SD-2b	5.2e-115
ZSDa005	ZSDa005_Chr7_gene_197090_mRNA	Chr7	RLK_WE	1	None	RLCK-V	6.5e-158
ZSDa005	ZSDa005_Chr5_gene_96250_mRNA	Chr5	RLK	1	LRRNT_2#LRR_8#LRR_8#LRR_1	LRR-III	1.8e-111
ZSDa005	ZSDa005_Chr2_gene_152260_mRNA	Chr2	RLK	1	LRRNT_2#LRR_8#LRR_8#LRR_1#LRR_4#LRR_8#LRR_4#LRR_8#LRR_1#LRR_8	LRR-XI-1	2.7e-87
ZSDa005	ZSDa005_Chr20_gene_107660_mRNA	Chr20	RLK	1	B_lectin#S_locus_glycop	SD-2b	7.2e-117
ZSDa005	ZSDa005_Chr4_gene_7240_mRNA	Chr4	RLK_WE	1	None	SD-2b	1.5e-104
ZSDa005	ZSDa005_Chr7_gene_187570_mRNA	Chr7	RLK	1	B_lectin#S_locus_glycop#PAN_1	SD-2b	6.9e-102
ZSDa005	ZSDa005_Chr8_gene_118080_mRNA	Chr8	RLK	1	Lectin_legB	L-LEC	3.3e-118
ZSDa005	ZSDa005_Chr16_gene_285490_mRNA	Chr16	RLK	1	GUB_WAK_bind	LRK10L-2	9.5e-130
ZSDa005	ZSDa005_Chr12_gene_233050_mRNA	Chr12	RLK	1	LRR_8#LRR_8#LRR_8#LRR_1#LRR_4#LRR_1	LRR-XI-1	6.5e-87
ZSDa005	ZSDa005_Chr15_gene_275550_mRNA	Chr15	RLK	1	B_lectin#S_locus_glycop#PAN_2	DLSV	2.1e-120
ZSDa005	ZSDa005_Chr11_gene_221510_mRNA	Chr11	RLK	1	LRRNT_2#LRR_1#LRR_1#LRR_8#LRR_1#LRR_1#LRR_8#LRR_8#LRR_4#LRR_8#LRR_8#LRR_8#LRR_8	LRR-XI-1	3.6e-93
ZSDa005	ZSDa005_Chr15_gene_267500_mRNA	Chr15	RLK	1	B_lectin#S_locus_glycop#PAN_2	DLSV	5.5e-123
ZSDa005	ZSDa005_Chr5_gene_89280_mRNA	Chr5	RLK	1	LRRNT_2#LRR_4#LRR_4	LRR-III	3.2e-108
ZSDa005	ZSDa005_Chr11_gene_221760_mRNA	Chr11	RLK_WE	1	None	RLCK-XVI	3.8e-145
ZSDa005	ZSDa005_Chr19_gene_242380_mRNA	Chr19	RLK	1	Stress-antifung#Stress-antifung	DLSV	5.1e-107
ZSDa005	ZSDa005_Chr7_gene_199620_mRNA	Chr7	RLK	1	LRRNT_2#LRR_8	LRR-VI-2	1.7e-109
ZSDa005	ZSDa005_Chr15_gene_269380_mRNA	Chr15	RLK	1	Stress-antifung#Stress-antifung	DLSV	4.6e-121
ZSDa005	ZSDa005_Chr20_gene_111360_mRNA	Chr20	RLK	1	B_lectin#S_locus_glycop#PAN_2	DLSV	1.8e-107
ZSDa005	ZSDa005_Chr15_gene_267350_mRNA	Chr15	RLK	1	B_lectin#S_locus_glycop#PAN_2	DLSV	3.4e-124
ZSDa005	ZSDa005_Chr8_gene_127250_mRNA	Chr8	RLK	1	S_locus_glycop#PAN_2	SD-2b	1.7e-122
ZSDa005	ZSDa005_Chr16_gene_282640_mRNA	Chr16	RLK_WE	1	None	LRK10L-2	3.8e-114
ZSDa005	ZSDa005_Chr20_gene_113840_mRNA	Chr20	RLK	1	LRR_8#LRR_8#LRR_8#Malectin	DLSV	2.9e-108
ZSDa005	ZSDa005_Chr9_gene_22310_mRNA	Chr9	RLK	1	LRR_8#LRR_1#LRR_1	LRR-V	6e-119
ZSDa005	ZSDa005_Chr11_gene_212290_mRNA	Chr11	RLK	1	LRRNT_2#LRR_4	LRR-III	1.3e-85
ZSDa005	ZSDa005_Chr2_gene_145230_mRNA	Chr2	RLK	1	LysM#LysM	LysM	3e-97
ZSDa005	ZSDa005_Chr2_gene_144620_mRNA	Chr2	RLK	1	LRR_8#LRR_1#LRR_1#LRR_8#LRR_1#LRR_8#LRR_4	LRR-XI-1	1.4e-82
ZSDa005	ZSDa005_Chr13_gene_294270_mRNA	Chr13	RLK	1	Lectin_legB	L-LEC	6.1e-111
ZSDa005	ZSDa005_Chr2_gene_140800_mRNA	Chr2	RLK	1	LysM#LysM	LysM	1e-54
ZSDa005	ZSDa005_Chr7_gene_189090_mRNA	Chr7	RLK	1	Lectin_legB	L-LEC	2.9e-107
ZSDa005	ZSDa005_Chr9_gene_31920_mRNA	Chr9	RLK	1	LRRNT_2#LRR_8#LRR_8#LRR_8#LRR_8#LRR_1#LRR_8#LRR_8#LRR_1#LRR_8	LRR-XI-1	4.3e-94
ZSDa005	ZSDa005_Chr5_gene_97460_mRNA	Chr5	RLK_WE	1	None	PERK-1	3e-151
ZSDa005	ZSDa005_Chr15_gene_269370_mRNA	Chr15	RLK	1	Stress-antifung#Stress-antifung	DLSV	1e-125
ZSDa005	ZSDa005_Chr15_gene_267250_mRNA	Chr15	RLK	1	B_lectin#S_locus_glycop#PAN_2	DLSV	1.7e-111
ZSDa005	ZSDa005_Chr17_gene_66570_mRNA	Chr17	RLK	1	LRRNT_2#LRR_8#LRR_8#LRR_8#LRR_8#LRR_8#LRR_1#LRR_8#LRR_8	LRR-XII-1	2.1e-114
ZSDa005	ZSDa005_Chr15_gene_260480_mRNA	Chr15	RLK	1	B_lectin#S_locus_glycop#PAN_2	DLSV	4.7e-113
ZSDa005	ZSDa005_Chr3_gene_325690_mRNA	Chr3	RLK	1	LRRNT_2#LRR_4#LRR_1#LRR_1#LRR_8#LRR_4#LRR_8#LRR_1#LRR_8	LRR-XI-1	3.2e-88
ZSDa005	ZSDa005_Chr3_gene_330290_mRNA	Chr3	RLK	1	LRRNT_2#LRR_4#LRR_1	LRR-III	3.9e-79
ZSDa005	ZSDa005_Chr8_gene_121790_mRNA	Chr8	RLK_WE	1	None	LRR-III	8.2e-67
ZSDa005	ZSDa005_Chr4_gene_11120_mRNA	Chr4	RLK	1	LRR_8#LRR_8#LRR_8	LRR-IX	3.8e-77
ZSDa005	ZSDa005_Chr15_gene_267230_mRNA	Chr15	RLK	1	B_lectin#S_locus_glycop#PAN_2	DLSV	8.2e-108
ZSDa005	ZSDa005_Chr17_gene_56430_mRNA	Chr17	RLK	1	LRR_8#LRR_8	LRR-VII-2	1.1e-74
ZSDa005	ZSDa005_Chr1_gene_342360_mRNA	Chr1	RLK	1	LRRNT_2#LRR_1#LRR_1	LRR-VI-2	2.1e-98
ZSDa005	ZSDa005_Chr18_gene_80940_mRNA	Chr18	RLK	1	LRRNT_2#LRR_6#LRR_8#LRR_1	LRR-V	1.3e-142
ZSDa005	ZSDa005_Chr15_gene_260330_mRNA	Chr15	RLK	1	B_lectin#S_locus_glycop#PAN_2	SD-2b	1.5e-120
ZSDa005	ZSDa005_Chr15_gene_262570_mRNA	Chr15	RLK	1	Malectin_like#LRR_8	LRR-I-1	1.6e-105
ZSDa005	ZSDa005_Chr17_gene_60400_mRNA	Chr17	RLK	1	GUB_WAK_bind	LRK10L-2	2.7e-136
ZSDa005	ZSDa005_Chr15_gene_275500_mRNA	Chr15	RLK	1	S_locus_glycop#S_locus_glycop#PAN_2	DLSV	5.6e-118
ZSDa005	ZSDa005_Chr10_gene_36990_mRNA	Chr10	RLK	1	Lectin_legB	L-LEC	6.6e-120
ZSDa005	ZSDa005_Chr19_gene_248910_mRNA	Chr19	RLK_WE	1	None	LRR-XI-1	2.1e-76
ZSDa005	ZSDa005_Chr2_gene_145860_mRNA	Chr2	RLK_WE	1	None	RLCK-V	2e-148
ZSDa005	ZSDa005_Chr14_gene_177570_mRNA	Chr14	RLK	1	LRR_8#LRR_1	LRR-III	1.4e-99
ZSDa005	ZSDa005_Chr15_gene_260700_mRNA	Chr15	RLK	1	Stress-antifung#Stress-antifung	DLSV	8.3e-125
ZSDa005	ZSDa005_Chr8_gene_135210_mRNA	Chr8	RLK	1	Malectin_like	CrRLK1L-1	9.6e-149
ZSDa005	ZSDa005_Chr13_gene_294040_mRNA	Chr13	RLK	1	LRRNT_2#LRR_8#LRR_8#LRR_8#LRR_8#LRR_8#LRR_8	LRR-XI-1	4.1e-110
ZSDa005	ZSDa005_Chr2_gene_137220_mRNA	Chr2	RLK	1	LRRNT_2#LRR_8#LRR_4#LRR_8#LRR_1#LRR_8#LRR_8#LRR_8#LRR_8#LRR_8	LRR-XI-1	4.8e-118
ZSDa005	ZSDa005_Chr9_gene_22350_mRNA	Chr9	RLK	1	LRR_8#LRR_1	LRR-III	2.9e-99
ZSDa005	ZSDa005_Chr15_gene_261920_mRNA	Chr15	RLK_WE	1	None	DLSV	6.4e-103
ZSDa005	ZSDa005_Chr8_gene_127520_mRNA	Chr8	RLK	1	Stress-antifung#Stress-antifung	DLSV	5.7e-124
ZSDa005	ZSDa005_Chr15_gene_260370_mRNA	Chr15	RLK	1	B_lectin#S_locus_glycop#PAN_2	DLSV	8.1e-128
ZSDa005	ZSDa005_Chr2_gene_152310_mRNA	Chr2	RLK	1	LRRNT_2#LRR_8#LRR_4#LRR_1#LRR_8#LRR_8#LRR_8#LRR_1#LRR_8#LRR_8#LRR_4#LRR_8	LRR-XI-1	1.7e-86
ZSDa005	ZSDa005_Chr5_gene_102240_mRNA	Chr5	RLK	1	B_lectin#PAN_2	SD-2b	1.9e-108
ZSDa005	ZSDa005_Chr3_gene_319880_mRNA	Chr3	RLK	1	LRRNT_2#LRR_8#LRR_1	LRR-III	2.8e-98
ZSDa005	ZSDa005_Chr4_gene_12920_mRNA	Chr4	RLK_WE	1	None	RLCK-V	1.1e-155
ZSDa005	ZSDa005_Chr10_gene_38120_mRNA	Chr10	RLK	1	LRR_8#LRR_1#LRR_8#LRR_8	LRR-XI-1	3.4e-111
ZSDa005	ZSDa005_Chr15_gene_267400_mRNA	Chr15	RLK_WE	1	None	DLSV	1.2e-67
ZSDa005	ZSDa005_Chr14_gene_177420_mRNA	Chr14	RLK	1	LRRNT_2#LRR_8#LRR_8#LRR_1	LRR-IV	1.2e-131
ZSDa005	ZSDa005_Chr5_gene_102210_mRNA	Chr5	RLK	1	B_lectin	SD-2b	1.7e-104
ZSDa005	ZSDa005_Chr8_gene_125840_mRNA	Chr8	RLK	1	Lectin_legB	L-LEC	2e-117
ZSDa005	ZSDa005_Chr17_gene_53500_mRNA	Chr17	RLK	1	LRRNT_2#LRR_8#LRR_1	LRR-III	2.6e-98
ZSDa005	ZSDa005_Chr8_gene_125850_mRNA	Chr8	RLK	1	Lectin_legB	L-LEC	1.7e-112
ZSDa005	ZSDa005_Chr15_gene_266840_mRNA	Chr15	RLK	1	LRR_4#LRR_8#LRR_8#Malectin	DLSV	6.7e-106
ZSDa005	ZSDa005_Chr8_gene_122010_mRNA	Chr8	RLK	2	LRRNT_2#LRR_8#LRR_8	LRR-III	8e-74
ZSDa005	ZSDa005_Chr19_gene_241880_mRNA	Chr19	RLK	1	Malectin_like	CrRLK1L-1	2.9e-125
ZSDa005	ZSDa005_Chr13_gene_294190_mRNA	Chr13	RLK	1	Lectin_legB	L-LEC	2.4e-120
ZSDa005	ZSDa005_Chr17_gene_59920_mRNA	Chr17	RLK_WE	1	None	PERK-1	2.8e-130
ZSDa005	ZSDa005_Chr5_gene_93270_mRNA	Chr5	RLK	1	LysM#LysM	LysM	1.9e-88
ZSDa005	ZSDa005_Chr5_gene_90390_mRNA	Chr5	RLK	1	B_lectin#S_locus_glycop#PAN_2	SD-2b	7.2e-108
ZSDa005	ZSDa005_Chr8_gene_130500_mRNA	Chr8	RLK_WE	1	None	RLCK-Os	1.6e-150
ZSDa005	ZSDa005_Chr4_gene_16270_mRNA	Chr4	RLK	1	Stress-antifung#Stress-antifung#Stress-antifung#Stress-antifung	DLSV	8.7e-124
ZSDa005	ZSDa005_Chr8_gene_117100_mRNA	Chr8	RLK	1	B_lectin#S_locus_glycop#PAN_2	DLSV	2.1e-126
ZSDa005	ZSDa005_Chr9_gene_34710_mRNA	Chr9	RLK	1	Lectin_legB	L-LEC	3.3e-121
ZSDa005	ZSDa005_Chr8_gene_135770_mRNA	Chr8	RLK	1	Lectin_legB	L-LEC	1.6e-105
ZSDa005	ZSDa005_Chr11_gene_221080_mRNA	Chr11	RLK	1	LRR_1#LRR_4#LRR_4	LRR-III	3.3e-83
ZSDa005	ZSDa005_Chr1_gene_347340_mRNA	Chr1	RLK	1	LRRNT_2#LRR_8#LRR_8#LRR_8#LRR_8#LRR_8#LRR_8#LRR_8	LRR-XI-1	1.8e-105
ZSDa005	ZSDa005_Chr8_gene_128690_mRNA	Chr8	RLK	1	LRRNT_2#LRR_4#LRR_4	LRR-III	5.6e-70
ZSDa005	ZSDa005_Chr14_gene_178330_mRNA	Chr14	RLK_WE	1	None	Extensin	1.7e-146
ZSDa005	ZSDa005_Chr5_gene_158850_mRNA	Chr5	RLK	1	Malectin_like#LRR_4#LRR_8	LRR-I-1	5.7e-110
ZSDa005	ZSDa005_Chr15_gene_273440_mRNA	Chr15	RLK	1	LRRNT_2#LRR_8#LRR_8#LRR_8#LRR_8#LRR_4#LRR_4#LRR_8#LRR_8#LRR_8	LRR-XI-1	2.5e-112
ZSDa005	ZSDa005_Chr9_gene_33990_mRNA	Chr9	RLK	1	LRRNT_2#LRR_8#LRR_8#LRR_8#LRR_8	LRR-III	2.9e-93
ZSDa005	ZSDa005_Chr15_gene_275540_mRNA	Chr15	RLK	1	B_lectin#S_locus_glycop#PAN_2	DLSV	2.3e-108
ZSDa005	ZSDa005_Chr2_gene_148570_mRNA	Chr2	RLK_WE	1	None	RLCK-IXa	2e-115
ZSDa005	ZSDa005_Chr15_gene_260710_mRNA	Chr15	RLK	1	Stress-antifung#Stress-antifung	DLSV	3.2e-124
ZSDa005	ZSDa005_Chr2_gene_148670_mRNA	Chr2	RLK	1	LRRNT_2#LRR_8#LRR_8#LRR_8#LRR_1#LRR_8#LRR_4#LRR_8#LRR_8#LRR_8	LRR-XI-1	4.9e-87
ZSDa005	ZSDa005_Chr8_gene_126960_mRNA	Chr8	RLK	1	LRRNT_2#LRR_1#LRR_8#LRR_4	LRR-V	2.7e-116
ZSDa005	ZSDa005_Chr16_gene_282560_mRNA	Chr16	RLK_WE	1	None	LRR-III	8e-78
ZSDa005	ZSDa005_Chr15_gene_270700_mRNA	Chr15	RLK	1	GUB_WAK_bind#WAK_assoc	WAK_LRK10L-1	3.3e-113
ZSDa005	ZSDa005_Chr8_gene_127580_mRNA	Chr8	RLK	1	Stress-antifung#Stress-antifung	DLSV	5.4e-123
ZSDa005	ZSDa005_Chr15_gene_269420_mRNA	Chr15	RLK	1	Stress-antifung	DLSV	5.8e-106
ZSDa005	ZSDa005_Chr13_gene_295380_mRNA	Chr13	RLK	1	LRRNT_2#LRR_8#LRR_8#LRR_4#LRR_8#LRR_4#LRR_8#LRR_8#LRR_8	LRR-XII-1	8.8e-82
ZSDa005	ZSDa005_Chr14_gene_175130_mRNA	Chr14	RLK_WE	1	None	LRR-XI-2	5.8e-82
ZSDa005	ZSDa005_Chr13_gene_294080_mRNA	Chr13	RLK	1	Lectin_legB	L-LEC	1.3e-115
ZSDa005	ZSDa005_Chr8_gene_135730_mRNA	Chr8	RLK	1	Lectin_legB	L-LEC	4.4e-117
ZSDa005	ZSDa005_Chr2_gene_152480_mRNA	Chr2	RLK	1	LRRNT_2#LRR_8#LRR_1#LRR_8#LRR_8#LRR_8#LRR_8#LRR_1#LRR_8	LRR-XI-1	2.1e-90
ZSDa005	ZSDa005_Chr12_gene_228460_mRNA	Chr12	RLK_WE	1	None	Extensin	6.4e-146
ZSDa005	ZSDa005_Chr5_gene_96920_mRNA	Chr5	RLK	1	GUB_WAK_bind#WAK_assoc	LRK10L-2	6.4e-130
ZSDa005	ZSDa005_Chr5_gene_160100_mRNA	Chr5	RLK	1	LRRNT_2#LRR_8#LRR_4	LRR-III	4.6e-103
ZSDa005	ZSDa005_Chr15_gene_267180_mRNA	Chr15	RLK	1	B_lectin#S_locus_glycop#PAN_2	DLSV	1.1e-102
ZSDa005	ZSDa005_Chr15_gene_269390_mRNA	Chr15	RLK	1	Stress-antifung#Stress-antifung	DLSV	1.6e-120
ZSDa005	ZSDa005_Chr9_gene_28000_mRNA	Chr9	RLK	1	Malectin_like	CrRLK1L-1	2.2e-146
ZSDa005	ZSDa005_Chr2_gene_152300_mRNA	Chr2	RLK	1	LRR_8#LRR_4#LRR_8#LRR_1#LRR_8#LRR_4#LRR_4#LRR_8#LRR_1#LRR_4#LRR_8#LRR_8#LRR_8	LRR-XI-1	6e-90
ZSDa005	ZSDa005_Chr15_gene_267260_mRNA	Chr15	RLK	1	B_lectin#S_locus_glycop#PAN_2	DLSV	2.4e-122
ZSDa005	ZSDa005_Chr4_gene_20230_mRNA	Chr4	RLK	1	EGF_CA	WAK	1.1e-107
ZSDa005	ZSDa005_Chr15_gene_267300_mRNA	Chr15	RLK	1	B_lectin#S_locus_glycop#PAN_2	DLSV	1.3e-122
ZSDa005	ZSDa005_Chr8_gene_133930_mRNA	Chr8	RLK	1	Malectin_like	CrRLK1L-1	1.7e-148
ZSDa005	ZSDa005_Chr7_gene_198470_mRNA	Chr7	RLK	1	GUB_WAK_bind#WAK#Plasmod_Pvs28#EGF_CA	WAK	2.8e-108
ZSDa005	ZSDa005_Chr15_gene_275520_mRNA	Chr15	RLK	1	B_lectin#S_locus_glycop#PAN_2	DLSV	1.2e-117
ZSDa005	ZSDa005_Chr15_gene_267210_mRNA	Chr15	RLK	1	B_lectin#S_locus_glycop#PAN_2	DLSV	2.3e-100
ZSDa005	ZSDa005_Chr8_gene_117070_mRNA	Chr8	RLK	1	B_lectin#S_locus_glycop#PAN_2	SD-2b	1e-124
ZSDa005	ZSDa005_Chr17_gene_53570_mRNA	Chr17	RLK	1	LRRNT_2#LRR_1#LRR_8#LRR_1	LRR-III	2.1e-95
ZSDa005	ZSDa005_Chr2_gene_152250_mRNA	Chr2	RLK	1	LRRNT_2#LRR_8#LRR_8#LRR_8#LRR_4#LRR_8#LRR_1#LRR_8#LRR_8#LRR_1#LRR_8	LRR-XI-1	6.1e-90
ZSDa005	ZSDa005_Chr9_gene_27070_mRNA	Chr9	RLK	1	LRRNT_2#LRR_8#LRR_8#LRR_8#LRR_8	LRR-VIII-1	2.1e-132
ZSDa005	ZSDa005_Chr4_gene_5690_mRNA	Chr4	RLK	1	LysM	LysM	4e-95
ZSDa005	ZSDa005_Chr4_gene_1370_mRNA	Chr4	RLK	1	LRRNT_2#LRR_8#LRR_8#LRR_8#LRR_8#LRR_1#LRR_4#LRR_8	LRR-XI-1	2.8e-101
ZSDa005	ZSDa005_Chr9_gene_24890_mRNA	Chr9	RLK_WE	1	None	RLCK-IXa	1.4e-89
ZSDa005	ZSDa005_Chr8_gene_124250_mRNA	Chr8	RLK	1	Bact_lectin	L-LEC	2.8e-108
ZSDa005	ZSDa005_Chr5_gene_159120_mRNA	Chr5	RLK	1	LRR_4#LRR_8	LRR-XI-2	5.5e-98
ZSDa005	ZSDa005_Chr17_gene_55030_mRNA	Chr17	RLK	1	LRR_1#LRR_4#LRR_1#LRR_8#LRR_8#LRR_8#LRR_8	LRR-XII-1	2.9e-94
ZSDa005	ZSDa005_Chr18_gene_80490_mRNA	Chr18	RLK	1	LRRNT_2#LRR_8#LRR_4	LRR-II	1.3e-148
ZSDa005	ZSDa005_Chr3_gene_329770_mRNA	Chr3	RLK_WE	1	None	RLCK-IXa	7.8e-91
ZSDa005	ZSDa005_Chr19_gene_235860_mRNA	Chr19	RLK_WE	1	None	RLCK-V	1e-154
ZSDa005	ZSDa005_Chr17_gene_63740_mRNA	Chr17	RLK	1	B_lectin#S_locus_glycop#PAN_2	SD-2b	1.7e-108
ZSDa005	ZSDa005_Chr8_gene_123970_mRNA	Chr8	RLK_WE	1	None	WAK	2.5e-100
ZSDa005	ZSDa005_Chr15_gene_269410_mRNA	Chr15	RLK	1	Stress-antifung#Stress-antifung	DLSV	9.9e-75
ZSDa005	ZSDa005_Chr11_gene_212520_mRNA	Chr11	RLK	1	LRRNT_2#LRR_8#LRR_8#LRR_8#LRR_8#LRR_8#LRR_1#LRR_8	LRR-Xb-1	2.8e-130
ZSDa005	ZSDa005_Chr2_gene_145740_mRNA	Chr2	RLK	1	LRRNT_2#LRR_8#LRR_8#LRR_8	LRR-XIV	1.3e-144
ZSDa005	ZSDa005_Chr5_gene_163790_mRNA	Chr5	RLK	1	Malectin_like#LRR_4	LRR-I-1	3.5e-104
ZSDa005	ZSDa005_Chr15_gene_261900_mRNA	Chr15	RLK	1	Lectin_legB	L-LEC	5.2e-121
ZSDa005	ZSDa005_Chr2_gene_152470_mRNA	Chr2	RLK	1	LRRNT_2#LRR_8#LRR_8#LRR_4#LRR_4#LRR_4#LRR_1#LRR_8#LRR_8#LRR_1#LRR_8	LRR-XI-1	1.7e-90
ZSDa005	ZSDa005_Chr8_gene_130510_mRNA	Chr8	RLK_WE	1	None	RLCK-Os	1e-130
ZSDa005	ZSDa005_Chr15_gene_263600_mRNA	Chr15	RLK	1	B_lectin#S_locus_glycop#PAN_2	SD-2b	3.1e-119
ZSDa005	ZSDa005_Chr13_gene_294240_mRNA	Chr13	RLK	1	Lectin_legB	L-LEC	1.2e-117
ZSDa005	ZSDa005_Chr18_gene_70230_mRNA	Chr18	RLK	1	B_lectin#S_locus_glycop#PAN_1	SD-2b	2.7e-108
ZSDa005	ZSDa005_Chr1_gene_339050_mRNA	Chr1	RLK	1	LRRNT_2#LRR_1#LRR_4#LRR_8#LRR_4#LRR_8#LRR_4#LRR_8#LRR_1	LRR-XIIIb	4.4e-151
ZSDa005	ZSDa005_Chr7_gene_198490_mRNA	Chr7	RLK	1	GUB_WAK_bind#WAK#EGF_3#EGF_CA	WAK	8.4e-104
ZSDa005	ZSDa005_Chr4_gene_19290_mRNA	Chr4	RLK	1	Lectin_legB	L-LEC	4.9e-117
ZSDa005	ZSDa005_Chr11_gene_213620_mRNA	Chr11	RLK	1	Stress-antifung#Stress-antifung	DLSV	1.2e-123
ZSDa005	ZSDa005_Chr12_gene_232840_mRNA	Chr12	RLK	1	Malectin_like	CrRLK1L-1	1.8e-118
ZSDa005	ZSDa005_Chr2_gene_152380_mRNA	Chr2	RLK	1	LRRNT_2#LRR_8#LRR_8#LRR_8#LRR_8#LRR_1#LRR_8#LRR_8#LRR_8	LRR-XI-1	2.5e-89
ZSDa005	ZSDa005_Chr16_gene_289480_mRNA	Chr16	RLK	1	GUB_WAK_bind	LRK10L-2	8.7e-129
ZSDa005	ZSDa005_Chr2_gene_149890_mRNA	Chr2	RLK	1	LRRNT_2#LRR_8#LRR_8#LRR_1#LRR_8#LRR_4#LRR_8#LRR_1#LRR_1#LRR_8#LRR_8#LRR_1#LRR_8	LRR-XI-1	1.5e-27
ZSDa005	ZSDa005_Chr19_gene_240670_mRNA	Chr19	RLK_WE	1	None	LysM	1.3e-97
ZSDa005	ZSDa005_Chr16_gene_277520_mRNA	Chr16	RLK	1	Lectin_legB	L-LEC	1.5e-106
ZSDa005	ZSDa005_Chr15_gene_267360_mRNA	Chr15	RLK	1	B_lectin#S_locus_glycop#PAN_2	DLSV	5.2e-114
ZSDa005	ZSDa005_Chr12_gene_227180_mRNA	Chr12	RLK	1	Malectin_like	CrRLK1L-1	1.9e-151
ZSDa005	ZSDa005_Chr14_gene_180130_mRNA	Chr14	RLK	1	B_lectin#PAN_2	SD-2b	3.2e-108
ZSDa005	ZSDa005_Chr19_gene_248920_mRNA	Chr19	RLK_WE	1	None	LRR-XI-1	1.9e-76
ZSDa005	ZSDa005_Chr5_gene_90400_mRNA	Chr5	RLK	1	B_lectin#S_locus_glycop#PAN_1	SD-2b	6.4e-107
ZSDa005	ZSDa005_Chr15_gene_271820_mRNA	Chr15	RLK	1	LRR_8#LRR_8#LRR_8	LRR-VI-1	1.1e-114
ZSDa005	ZSDa005_Chr17_gene_51640_mRNA	Chr17	RLK	1	LRRNT_2#LRR_1#LRR_8	LRR-II	1.5e-152
ZSDa005	ZSDa005_Chr13_gene_293980_mRNA	Chr13	RLK	1	LRRNT_2#LRR_4#LRR_8#LRR_8#LRR_8	LRR-XIV	5.7e-144
ZSDa005	ZSDa005_Chr8_gene_130090_mRNA	Chr8	RLK	1	LRRNT_2#LRR_1#LRR_8	LRR-II	1.1e-134
ZSDa005	ZSDa005_Chr15_gene_274590_mRNA	Chr15	RLK_WE	1	None	PERK-1	2.7e-151
ZSDa005	ZSDa005_Chr13_gene_294170_mRNA	Chr13	RLK	1	Lectin_legB	L-LEC	3.8e-116
ZSDa005	ZSDa005_Chr4_gene_12430_mRNA	Chr4	RLK	1	SPARK	RKF3	5.5e-103
ZSDa005	ZSDa005_Chr7_gene_194660_mRNA	Chr7	RLK	1	Stress-antifung	DLSV	4.1e-109
ZSDa005	ZSDa005_Chr15_gene_275510_mRNA	Chr15	RLK	1	B_lectin#S_locus_glycop#PAN_2	DLSV	7.4e-102
ZSDa005	ZSDa005_Chr9_gene_26920_mRNA	Chr9	RLK	1	LRRNT_2#LRR_4#LRR_8#LRR_4	LRR-VIII-1	2.6e-128
ZSDa005	ZSDa005_Chr15_gene_260310_mRNA	Chr15	RLK	1	B_lectin#S_locus_glycop#PAN_2	SD-2b	2.3e-124
ZSDa005	ZSDa005_Chr5_gene_156610_mRNA	Chr5	RLK	1	LRRNT_2#LRR_8#LRR_1	LRR-Xa	6.5e-119
ZSDa005	ZSDa005_Chr20_gene_110120_mRNA	Chr20	RLK	1	B_lectin#S_locus_glycop#PAN_2	DLSV	6.3e-124
ZSDa005	ZSDa005_Chr19_gene_257440_mRNA	Chr19	RLK	1	LRRNT_2#LRR_1#LRR_8	LRR-II	9.9e-155
ZSDa005	ZSDa005_Chr15_gene_268800_mRNA	Chr15	RLK	1	Malectin_like	CrRLK1L-1	2.5e-153
ZSDa005	ZSDa005_Chr17_gene_64600_mRNA	Chr17	RLK	1	LRRNT_2#LRR_8#LRR_1#LRR_1#LRR_8#LRR_1#LRR_8#LRR_8#LRR_8#LRR_8#LRR_8	LRR-XII-1	5.8e-120
ZSDa005	ZSDa005_Chr19_gene_253820_mRNA	Chr19	RLK	1	Malectin_like	CrRLK1L-1	1.2e-126
ZSDa005	ZSDa005_Chr7_gene_196590_mRNA	Chr7	RLK	1	Stress-antifung#Stress-antifung	DLSV	2.2e-110
ZSDa005	ZSDa005_Chr7_gene_198510_mRNA	Chr7	RLK	1	GUB_WAK_bind#WAK#EGF_3#EGF_CA	WAK	4.8e-106
ZSDa005	ZSDa005_Chr8_gene_127630_mRNA	Chr8	RLK	1	Stress-antifung#Stress-antifung	DLSV	2.1e-120
ZSDa005	ZSDa005_Chr8_gene_127290_mRNA	Chr8	RLK	1	B_lectin#S_locus_glycop#PAN_2	DLSV	3.7e-120
ZSDa005	ZSDa005_Chr10_gene_45680_mRNA	Chr10	RLK	2	LRR_4	LRR-VIII-1	8.4e-254
ZSDa005	ZSDa005_Chr15_gene_260400_mRNA	Chr15	RLK	1	B_lectin#S_locus_glycop#PAN_2#B_lectin#S_locus_glycop#PAN_2	DLSV	2.1e-105
ZSDa005	ZSDa005_Chr19_gene_241910_mRNA	Chr19	RLK	1	Malectin_like	CrRLK1L-1	1.9e-125
ZSDa005	ZSDa005_Chr8_gene_129050_mRNA	Chr8	RLK	1	LRR_8#LRR_4#LRR_8	LRR-VI-1	8.1e-107
ZSDa005	ZSDa005_Chr15_gene_269190_mRNA	Chr15	RLK	1	B_lectin#S_locus_glycop#PAN_2	SD-2b	1.6e-116
ZSDa005	ZSDa005_Chr4_gene_16430_mRNA	Chr4	RLK_WE	1	None	PERK-1	1e-77
ZSDa005	ZSDa005_Chr14_gene_180120_mRNA	Chr14	RLK	1	B_lectin#PAN_2	SD-2b	4.4e-106
ZSDa005	ZSDa005_Chr2_gene_145300_mRNA	Chr2	RLK	1	GUB_WAK_bind#EGF_3	WAK_LRK10L-1	3.2e-125
ZSDa005	ZSDa005_Chr14_gene_185410_mRNA	Chr14	RLK	1	LRRNT_2#LRR_8#LRR_1#LRR_8#LRR_8#LRR_8#LRR_8	LRR-Xb-1	2.2e-125
ZSDa005	ZSDa005_Chr12_gene_232830_mRNA	Chr12	RLK	1	Malectin_like	CrRLK1L-1	3e-140
ZSDa005	ZSDa005_Chr8_gene_125820_mRNA	Chr8	RLK	1	LRR_4#LRR_8#LRR_1#LRR_8#LRR_4#LRR_8#LRR_8#LRR_1	LRR-XI-1	1.7e-109
ZSDa005	ZSDa005_Chr19_gene_237210_mRNA	Chr19	RLK_WE	1	None	Extensin	6.1e-132
ZSDa005	ZSDa005_Chr5_gene_101980_mRNA	Chr5	RLK	1	LRRNT_2#LRR_8#LRR_4#LRR_1#LRR_4#LRR_8#LRR_8#LRR_8#LRR_1#Island#LRR_8	LRR-Xb-1	1.3e-129
ZSDa005	ZSDa005_Chr14_gene_176560_mRNA	Chr14	RLK_WE	1	None	RLCK-V	4.1e-158
ZSDa005	ZSDa005_Chr15_gene_260410_mRNA	Chr15	RLK	1	B_lectin#S_locus_glycop#PAN_2	DLSV	6.5e-124
ZSDa005	ZSDa005_Chr15_gene_269430_mRNA	Chr15	RLK	1	Stress-antifung	DLSV	1.4e-107
ZSDa005	ZSDa005_Chr7_gene_189430_mRNA	Chr7	RLK	1	LRRNT_2#LRR_8#LRR_8#LRR_8#LRR_8#LRR_8	LRR-III	7.2e-100
ZSDa005	ZSDa005_Chr5_gene_99880_mRNA	Chr5	RLK	1	LRRNT_2#LRR_4#LRR_8#LRR_4#LRR_4#LRR_8#LRR_8#LRR_8#LRR_1	LRR-III	5.3e-76
ZSDa005	ZSDa005_Chr8_gene_130460_mRNA	Chr8	RLK_WE	1	None	RLCK-Os	1.8e-59
ZSDa005	ZSDa005_Chr8_gene_120070_mRNA	Chr8	RLK	1	LRRNT_2#LRR_8#LRR_8#LRR_8#LRR_8#LRR_1#LRR_8#LRR_1	LRR-XII-1	4.1e-100
ZSDa005	ZSDa005_Chr13_gene_294140_mRNA	Chr13	RLK	1	Lectin_legB	L-LEC	4e-115
ZSDa005	ZSDa005_Chr2_gene_152700_mRNA	Chr2	RLK	1	LRRNT_2#LRR_8#LRR_8#LRR_8#LRR_4#LRR_8#LRR_8#LRR_8#LRR_1#LRR_1#LRR_8#LRR_8#LRR_1#LRR_1	LRR-XI-1	5.5e-91
ZSDa005	ZSDa005_Chr13_gene_293740_mRNA	Chr13	RLK_WE	1	None	PERK-1	2.5e-156
ZSDa005	ZSDa005_Chr17_gene_57060_mRNA	Chr17	RLK	1	LRRNT_2#LRR_8#LRR_8#LRR_8#LRR_4#LRR_8	LRR-XI-1	8.1e-106
ZSDa005	ZSDa005_Chr17_gene_58850_mRNA	Chr17	RLK	1	LRRNT_2#LRR_8#LRR_8#LRR_1#LRR_8#LRR_8#LRR_8#LRR_8#LRR_8	LRR-XII-1	6.3e-122
ZSDa005	ZSDa005_Chr16_gene_290500_mRNA	Chr16	RLK	1	LRRNT_2#LRR_4#LRR_8	LRR-XIIIa	5.5e-133
ZSDa005	ZSDa005_Chr2_gene_144100_mRNA	Chr2	RLK	1	LRRNT_2#LRR_8#LRR_4#LRR_4#LRR_8#LRR_8#LRR_1#LRR_8#LRR_8#LRR_8#LRR_8#LRR_8	LRR-XI-1	2.8e-89
ZSDa005	ZSDa005_Chr17_gene_66770_mRNA	Chr17	RLK	1	LRRNT_2#LRR_4#LRR_8#LRR_8#LRR_4#LRR_8#LRR_4#LRR_8	LRR-XII-1	1.6e-85
ZSDa005	ZSDa005_Chr12_gene_232740_mRNA	Chr12	RLK	1	LRRNT_2#LRR_8#LRR_8#LRR_8#LRR_8#LRR_8#LRR_1#LRR_8	LRR-VII-1	3e-124
ZSDa005	ZSDa005_Chr16_gene_289420_mRNA	Chr16	RLK	1	GUB_WAK_bind	LRK10L-2	3.3e-129
ZSDa005	ZSDa005_Chr7_gene_198220_mRNA	Chr7	RLK	1	B_lectin#S_locus_glycop#PAN_2	SD-2b	3.1e-104
ZSDa005	ZSDa005_Chr4_gene_5450_mRNA	Chr4	RLK	1	Stress-antifung#Stress-antifung#Stress-antifung#Stress-antifung	DLSV	3.6e-122
ZSDa005	ZSDa005_Chr15_gene_267520_mRNA	Chr15	RLK	1	B_lectin#S_locus_glycop#PAN_2	DLSV	1.5e-121
ZSDa005	ZSDa005_Chr14_gene_175050_mRNA	Chr14	RLK_WE	1	None	RLCK-IXa	1.3e-117
ZSDa005	ZSDa005_Chr9_gene_25920_mRNA	Chr9	RLK	1	LRRNT_2#LRR_4#LRR_4	LRR-II	3.4e-149
ZSDa005	ZSDa005_Chr13_gene_294100_mRNA	Chr13	RLK	1	Lectin_legB	L-LEC	1.1e-116
ZSDa005	ZSDa005_Chr16_gene_289350_mRNA	Chr16	RLK	1	GUB_WAK_bind	LRK10L-2	2.3e-131
ZSDa005	ZSDa005_Chr13_gene_294060_mRNA	Chr13	RLK	1	Lectin_legB	L-LEC	6.7e-117
ZSDa005	ZSDa005_Chr15_gene_269460_mRNA	Chr15	RLK	1	Stress-antifung#Stress-antifung	DLSV	2.1e-120
ZSDa005	ZSDa005_Chr17_gene_61140_mRNA	Chr17	RLK	1	GUB_WAK_bind	WAK_LRK10L-1	1.8e-126
ZSDa005	ZSDa005_Chr4_gene_12420_mRNA	Chr4	RLK	1	SPARK	RKF3	1.6e-103
ZSDa005	ZSDa005_Chr8_gene_127590_mRNA	Chr8	RLK	1	Stress-antifung#Stress-antifung	DLSV	3.1e-122
ZSDa005	ZSDa005_Chr14_gene_174480_mRNA	Chr14	RLK	1	LRRNT_2#LRR_4#LRR_8	LRR-Xa	1.6e-136
ZSDa005	ZSDa005_Chr15_gene_269200_mRNA	Chr15	RLK	1	B_lectin#S_locus_glycop#PAN_2	SD-2b	2.5e-116
ZSDa005	ZSDa005_Chr15_gene_260440_mRNA	Chr15	RLK	1	B_lectin#S_locus_glycop#PAN_2	DLSV	3.1e-125
ZSDa005	ZSDa005_Chr5_gene_166330_mRNA	Chr5	RLK	1	LRRNT_2#LRR_4#LRR_8#LRR_1	LRR-V	5.4e-143
ZSDa005	ZSDa005_Chr5_gene_165780_mRNA	Chr5	RLK	1	LRR_8	LRR-III	1.4e-102
ZSDa005	ZSDa005_Chr17_gene_60540_mRNA	Chr17	RLK	1	GUB_WAK_bind#WAK_assoc	LRK10L-2	2.9e-122
ZSDa005	ZSDa005_Chr14_gene_185340_mRNA	Chr14	RLK_WE	1	None	RLCK-XIII	3e-115
ZSDa005	ZSDa005_Chr2_gene_152210_mRNA	Chr2	RLK	1	LRRNT_2#LRR_8#LRR_8#LRR_4#LRR_8#LRR_1#LRR_4#LRR_4#LRR_4#LRR_8#LRR_1#LRR_8	LRR-XI-1	5.9e-84
ZSDa005	ZSDa005_Chr2_gene_152400_mRNA	Chr2	RLK	1	LRRNT_2#LRR_8#LRR_1#LRR_8#LRR_8#LRR_8#LRR_1#LRR_1#LRR_8	LRR-XI-1	9.6e-90
ZSDa005	ZSDa005_Chr15_gene_260460_mRNA	Chr15	RLK	1	B_lectin#S_locus_glycop#PAN_2	DLSV	1.7e-126
ZSDa005	ZSDa005_Chr2_gene_144050_mRNA	Chr2	RLK	1	LRRNT_2#LRR_4#LRR_1#LRR_8#LRR_8#LRR_4#LRR_1#LRR_8#LRR_8#LRR_8#LRR_8	LRR-XI-1	1.2e-111
ZSDa005	ZSDa005_Chr6_gene_299050_mRNA	Chr6	RLK_WE	1	None	RLCK-V	6e-156
ZSDa005	ZSDa005_Chr20_gene_112800_mRNA	Chr20	RLK_WE	1	None	RLCK-V	1.2e-158
ZSDa005	ZSDa005_Chr8_gene_127220_mRNA	Chr8	RLK	1	B_lectin#S_locus_glycop#PAN_2	SD-2b	1.2e-119
ZSDa005	ZSDa005_Chr18_gene_83070_mRNA	Chr18	RLK	1	Lectin_legB	L-LEC	5.7e-120
ZSDa005	ZSDa005_Chr3_gene_324180_mRNA	Chr3	RLK_WE	1	None	LRR-I-2	2.5e-143
ZSDa005	ZSDa005_Chr3_gene_330180_mRNA	Chr3	RLK_WE	1	None	URK-2	3.7e-102
ZSDa005	ZSDa005_Chr15_gene_266260_mRNA	Chr15	RLK	1	B_lectin#S_locus_glycop#PAN_2	DLSV	9.6e-118
ZSDa005	ZSDa005_Chr19_gene_238130_mRNA	Chr19	RLK	1	LRR_8#LRR_4#LRR_8#Malectin	DLSV	1.3e-110
ZSDa005	ZSDa005_Chr20_gene_107020_mRNA	Chr20	RLK	1	LRR_8#LRR_8#LRR_8#Malectin	DLSV	1.9e-107
ZSDa005	ZSDa005_Chr10_gene_39760_mRNA	Chr10	RLK	1	B_lectin#S_locus_glycop#PAN_2	SD-2b	2.7e-120
ZSDa005	ZSDa005_Chr20_gene_107050_mRNA	Chr20	RLK	1	LRR_8#LRR_8#LRR_4#Malectin	DLSV	2.8e-108
ZSDa005	ZSDa005_Chr18_gene_76990_mRNA	Chr18	RLK	1	Lectin_legB	L-LEC	2.5e-119
ZSDa005	ZSDa005_Chr5_gene_158460_mRNA	Chr5	RLK	1	S_locus_glycop#PAN_2	SD-2b	1.4e-121
ZSDa005	ZSDa005_Chr13_gene_294260_mRNA	Chr13	RLK	1	Lectin_legB	L-LEC	2e-116
ZSDa005	ZSDa005_Chr15_gene_275580_mRNA	Chr15	RLK	1	B_lectin#S_locus_glycop#PAN_2	DLSV	4.8e-121
ZSDa005	ZSDa005_Chr2_gene_152130_mRNA	Chr2	RLK	1	LRRNT_2#LRR_8#LRR_8#LRR_4#LRR_4#LRR_1#LRR_8#LRR_8#LRR_1#LRR_1#LRR_8	LRR-XI-1	2.6e-90
ZSDa005	ZSDa005_Chr4_gene_20260_mRNA	Chr4	RLK	1	GUB_WAK_bind#EGF_3#EGF_CA	WAK	3.6e-107
ZSDa005	ZSDa005_Chr13_gene_294120_mRNA	Chr13	RLK	1	Lectin_legB	L-LEC	9.3e-117
ZSDa005	ZSDa005_Chr15_gene_267340_mRNA	Chr15	RLK	1	B_lectin#S_locus_glycop#PAN_2	DLSV	4.2e-116
ZSDa005	ZSDa005_Chr5_gene_97320_mRNA	Chr5	RLK	1	GUB_WAK_bind	LRK10L-2	1e-128
ZSDa005	ZSDa005_Chr17_gene_55140_mRNA	Chr17	RLK	1	Lectin_legB	L-LEC	6e-114
ZSDa005	ZSDa005_Chr8_gene_135670_mRNA	Chr8	RLK_WE	1	None	PERK-1	3.3e-153
ZSDa005	ZSDa005_Chr13_gene_294460_mRNA	Chr13	RLK_WE	1	None	LysM	9.7e-67
ZSDa005	ZSDa005_Chr10_gene_50080_mRNA	Chr10	RLK	2	B_lectin#S_locus_glycop#PAN_2	SD-2b	2.9e-69
ZSDa005	ZSDa005_Chr8_gene_127620_mRNA	Chr8	RLK	1	Stress-antifung#Stress-antifung	DLSV	3.2e-107
ZSDa005	ZSDa005_Chr15_gene_267470_mRNA	Chr15	RLK	1	B_lectin#S_locus_glycop#PAN_2	DLSV	6.2e-122
ZSDa005	ZSDa005_Chr17_gene_66730_mRNA	Chr17	RLK	1	LRRNT_2#LRR_8#LRR_8#LRR_8#LRR_8#LRR_4#LRR_8#LRR_8#LRR_8	LRR-XII-1	2.9e-85
ZSDa005	ZSDa005_Chr12_gene_226310_mRNA	Chr12	RLK	1	LRR_4#LRR_8#LRR_1#LRR_8	LRR-VIII-1	3e-114
ZSDa005	ZSDa005_Chr18_gene_68460_mRNA	Chr18	RLK	1	LRRNT_2#LRR_8#LRR_8#LRR_8#LRR_8#LRR_8#LRR_8#LRR_1	LRR-XII-1	1.6e-110
ZSDa005	ZSDa005_Chr20_gene_112640_mRNA	Chr20	RLK	1	LRR_4#LRR_8#LRR_8#Malectin	DLSV	1.8e-101
ZSDa005	ZSDa005_Chr15_gene_270410_mRNA	Chr15	RLK	1	LRRNT_2#LRR_8#LRR_8#LRR_8#LRR_8#LRR_4#LRR_8#LRR_4#LRR_8#LRR_8#LRR_1#LRR_8#LRR_8	LRR-XI-1	4.3e-98
ZSDa005	ZSDa005_Chr4_gene_20250_mRNA	Chr4	RLK	1	EGF#EGF_CA	WAK	1.1e-106
ZSDa005	ZSDa005_Chr17_gene_64940_mRNA	Chr17	RLK	1	B_lectin#S_locus_glycop#PAN_2	SD-2b	2.7e-113
ZSDa005	ZSDa005_Chr13_gene_294200_mRNA	Chr13	RLK	1	Lectin_legB	L-LEC	1.8e-114
ZSDa005	ZSDa005_Chr16_gene_284050_mRNA	Chr16	RLK	1	LRRNT_2#LRR_4#LRR_4#LRR_1#LRR_4#LRR_8#LRR_4#LRR_8#LRR_8#LRR_1#Island#LRR_8	LRR-Xb-1	6.4e-128
ZSDa005	ZSDa005_Chr1_gene_341530_mRNA	Chr1	RLK	1	GUB_WAK_bind	LRK10L-2	2.9e-130
ZSDa005	ZSDa005_Chr20_gene_115070_mRNA	Chr20	RLK	1	LRRNT_2#LRR_8	LRR-VI-2	3.9e-107
ZSDa005	ZSDa005_Chr5_gene_99260_mRNA	Chr5	RLK	1	LysM	LysM	4.8e-99
ZSDa005	ZSDa005_Chr8_gene_130400_mRNA	Chr8	RLK_WE	1	None	RLCK-Os	2.2e-150
ZSDa005	ZSDa005_Chr7_gene_193800_mRNA	Chr7	RLK	1	Lectin_legB	L-LEC	1.8e-109
ZSDa005	ZSDa005_Chr9_gene_27590_mRNA	Chr9	RLK	1	LRRNT_2#LRR_8	LRR-VI-2	1.1e-117
ZSDa005	ZSDa005_Chr12_gene_222260_mRNA	Chr12	RLK_WE	1	None	RLCK-V	9.4e-158
ZSDa005	ZSDa005_Chr4_gene_11810_mRNA	Chr4	RLK	1	LRR_1#LRR_8	LRR-Xa	3.2e-134
ZSDa005	ZSDa005_Chr1_gene_335880_mRNA	Chr1	RLK	1	LRR_8#LRR_8#LRR_8	LRR-XI-1	3.9e-34
ZSDa005	ZSDa005_Chr10_gene_41310_mRNA	Chr10	RLK	1	LRRNT_2#LRR_8#LRR_4#LRR_4#LRR_8#LRR_8	LRR-XV	8.2e-109
ZSDa005	ZSDa005_Chr11_gene_211390_mRNA	Chr11	RLK	1	LRR_1#LRR_8#LRR_1#LRR_8#LRR_8#LRR_8	LRR-XI-1	6.7e-112
ZSDa005	ZSDa005_Chr4_gene_18550_mRNA	Chr4	RLK	1	LRRNT_2#LRR_4#LRR_4#LRR_8#LRR_1#LRR_8#LRR_8#LRR_8#LRR_8#LRR_8	LRR-XI-1	7.4e-97
ZSDa005	ZSDa005_Chr10_gene_46150_mRNA	Chr10	RLK	1	LRR_1#LRR_8#LRR_1#LRR_8	LRR-VI-1	2e-103
ZSDa005	ZSDa005_Chr20_gene_103320_mRNA	Chr20	RLK	1	B_lectin#S_locus_glycop#PAN_2	DLSV	2e-124
ZSDa005	ZSDa005_Chr17_gene_62720_mRNA	Chr17	RLK	1	LRRNT_2#LRR_8#LRR_1#LRR_8#LRR_8#LRR_1#LRR_8#LRR_8#LRR_8#LRR_4#LRR_8	LRR-XII-1	2.7e-120
ZSDa005	ZSDa005_Chr20_gene_115030_mRNA	Chr20	RLK_WE	1	None	Extensin	4.9e-137
ZSDa005	ZSDa005_Chr7_gene_189670_mRNA	Chr7	RLK	1	LRRNT_2#LRR_8#LRR_1#LRR_4	LRR-III	6.5e-115
ZSDa005	ZSDa005_Chr7_gene_198200_mRNA	Chr7	RLK	1	Lectin_legB	L-LEC	1.2e-108
ZSDa005	ZSDa005_Chr6_gene_312290_mRNA	Chr6	RLK	1	LRRNT_2#LRR_8#LRR_1#LRR_4	LRR-III	1.8e-32
ZSDa005	ZSDa005_Chr15_gene_269180_mRNA	Chr15	RLK	1	B_lectin#S_locus_glycop#PAN_2	SD-2b	1.1e-119
ZSDa005	ZSDa005_Chr15_gene_269440_mRNA	Chr15	RLK	1	Stress-antifung	DLSV	3.7e-107
ZSDa005	ZSDa005_Chr5_gene_96930_mRNA	Chr5	RLK	1	GUB_WAK_bind#WAK_assoc	LRK10L-2	3.8e-132
ZSDa005	ZSDa005_Chr15_gene_267440_mRNA	Chr15	RLK	1	B_lectin#S_locus_glycop#PAN_2	DLSV	5e-119
ZSDa005	ZSDa005_Chr15_gene_274690_mRNA	Chr15	RLK	1	LRRNT_2#LRR_4#LRR_8#LRR_4#LRR_4#LRR_8	LRR-XI-1	5.3e-104
ZSDa005	ZSDa005_Chr17_gene_58990_mRNA	Chr17	RLK_WE	1	None	SD-2b	1.2e-100
ZSDa005	ZSDa005_Chr15_gene_260380_mRNA	Chr15	RLK	1	B_lectin#S_locus_glycop#PAN_2	DLSV	6.3e-122
ZSDa005	ZSDa005_Chr17_gene_58080_mRNA	Chr17	RLK	1	LRR_8#LRR_8	LRR-VI-1	1e-99
ZSDa005	ZSDa005_Chr17_gene_66760_mRNA	Chr17	RLK	1	LRRNT_2#LRR_8#LRR_8#LRR_8#LRR_1#LRR_1#LRR_1#LRR_8#LRR_8	LRR-XII-1	1.1e-122
ZSDa005	ZSDa005_Chr18_gene_76080_mRNA	Chr18	RLK	1	LRRNT_2#LRR_8#LRR_1#LRR_8#LRR_8#LRR_4#LRR_8#LRR_8	LRR-XIIIb	2.9e-155
ZSDa005	ZSDa005_Chr17_gene_52220_mRNA	Chr17	RLK_WE	1	None	PERK-1	9.4e-152
ZSDa005	ZSDa005_Chr10_gene_46960_mRNA	Chr10	RLK_WE	1	None	RLCK-V	1.4e-157
ZSDa005	ZSDa005_Chr13_gene_294230_mRNA	Chr13	RLK	1	Lectin_legB	L-LEC	1e-103
ZSDa005	ZSDa005_Chr17_gene_66540_mRNA	Chr17	RLK	2	Kinase#LRRNT_2#LRR_8#LRR_8#LRR_8#LRR_8#LRR_8#LRR_1#LRR_8	LRR-XII-1	3.1e-222
ZSDa005	ZSDa005_Chr2_gene_144600_mRNA	Chr2	RLK	1	LRRNT_2#LRR_1	LRR-XI-1	1.1e-77
ZSDa005	ZSDa005_Chr5_gene_90110_mRNA	Chr5	RLK	1	LRR_1#LRR_8#LRR_8#LRR_1#LRR_8#LRR_8#LRR_8#LRR_8	LRR-XI-1	5.2e-71
ZSDa005	ZSDa005_Chr3_gene_320940_mRNA	Chr3	RLK	1	LRRNT_2#LRR_8#LRR_8#LRR_1#LRR_8#LRR_1#LRR_1#LRR_8#LRR_8	LRR-XII-1	1.7e-105
ZSDa005	ZSDa005_Chr7_gene_198530_mRNA	Chr7	RLK	1	GUB_WAK_bind#WAK#cEGF#EGF_3	WAK	4.8e-106
ZSDa005	ZSDa005_Chr13_gene_315640_mRNA	Chr13	RLK	1	Lectin_legB	L-LEC	1.8e-121
ZSDa005	ZSDa005_Chr12_gene_233060_mRNA	Chr12	RLK	1	LRR_8#LRR_1#LRR_8#LRR_8#LRR_4#LRR_8#LRR_4#LRR_8#LRR_8#LRR_8#LRR_1#LRR_8	LRR-XI-1	1.7e-87
ZSDa005	ZSDa005_Chr5_gene_162350_mRNA	Chr5	RLK_WE	1	None	PERK-1	2.7e-125
ZSDa005	ZSDa005_Chr20_gene_104410_mRNA	Chr20	RLK_WE	1	None	RLCK-IXa	2.5e-49
ZSDa005	ZSDa005_Chr13_gene_316090_mRNA	Chr13	RLK	1	Lectin_legB	L-LEC	1.4e-116
ZSDa005	ZSDa005_Chr3_gene_333020_mRNA	Chr3	RLK	1	Lectin_legB	L-LEC	3.6e-104
ZSDa005	ZSDa005_Chr17_gene_65870_mRNA	Chr17	RLK	1	LRRNT_2#LRR_8#LRR_4#LRR_8#LRR_8#LRR_8#LRR_8#LRR_8#LRR_8#LRR_1#LRR_8	LRR-XII-1	5.5e-120
ZSDa005	ZSDa005_Chr5_gene_162410_mRNA	Chr5	RLK_WE	1	None	PERK-1	5.4e-118
ZSDa005	ZSDa005_Chr4_gene_12880_mRNA	Chr4	RLK	1	WAK_assoc	LRK10L-2	1.3e-132
ZSDa005	ZSDa005_Chr19_gene_256090_mRNA	Chr19	RLK	1	B_lectin#S_locus_glycop#PAN_2	DLSV	4.4e-122
ZSDa005	ZSDa005_Chr8_gene_136560_mRNA	Chr8	RLK	1	LRRNT_2#LRR_8#LRR_8#LRR_4#LRR_1#LRR_8#LRR_8#LRR_4	LRR-XV	9.9e-125
ZSDa005	ZSDa005_Chr16_gene_286410_mRNA	Chr16	RLK	1	LRRNT_2#LRR_8#LRR_8#LRR_8#LRR_8#LRR_8#LRR_1#LRR_8	LRR-XII-1	2.4e-102
ZSDa005	ZSDa005_Chr13_gene_315830_mRNA	Chr13	RLK	1	LRRNT_2#LRR_8#LRR_8#LRR_1#LRR_8#LRR_8#LRR_8#LRR_8#LRR_8	LRR-XI-1	1.4e-119
ZSDa005	ZSDa005_Chr13_gene_294130_mRNA	Chr13	RLK	1	Lectin_legB	L-LEC	2.5e-119
ZSDa005	ZSDa005_Chr12_gene_234410_mRNA	Chr12	RLK	1	Lectin_legB	L-LEC	3.3e-117
ZSDa005	ZSDa005_Chr7_gene_189030_mRNA	Chr7	RLK	1	RCC1_2#RCC1_2#RCC1_2#RCC1_2	CR4L	9.8e-115
ZSDa005	ZSDa005_Chr9_gene_27140_mRNA	Chr9	RLK	1	LRRNT_2#LRR_8#LRR_8#LRR_1	LRR-III	1.3e-110
ZSDa005	ZSDa005_Chr19_gene_238100_mRNA	Chr19	RLK	1	LRR_4#LRR_4#LRR_8#LRR_1#Malectin	DLSV	2.7e-110
ZSDa005	ZSDa005_Chr13_gene_316120_mRNA	Chr13	RLK	1	LysM#LysM	LysM	1.9e-77
ZSDa005	ZSDa005_Chr5_gene_90730_mRNA	Chr5	RLK_WE	1	None	LRR-Xb-1	1.8e-101
ZSDa005	ZSDa005_Chr7_gene_206380_mRNA	Chr7	RLK	1	Malectin_like	CrRLK1L-1	2.4e-137
ZSDa005	ZSDa005_Chr12_gene_232850_mRNA	Chr12	RLK	1	Malectin_like	CrRLK1L-1	1.1e-140
ZSDa005	ZSDa005_Chr18_gene_81940_mRNA	Chr18	RLK	1	LRRNT_2#LRR_8	LRR-II	1.1e-148
ZSDa005	ZSDa005_Chr2_gene_137710_mRNA	Chr2	RLK	1	LRRNT_2#LRR_8	LRR-III	9e-83
ZSDa005	ZSDa005_Chr15_gene_267390_mRNA	Chr15	RLK	1	B_lectin#S_locus_glycop#PAN_2	DLSV	1.4e-122
ZSDa005	ZSDa005_Chr13_gene_294160_mRNA	Chr13	RLK	1	Lectin_legB	L-LEC	8.2e-115
ZSDa005	ZSDa005_Chr2_gene_152730_mRNA	Chr2	RLK	1	LRRNT_2#LRR_4#LRR_4#LRR_8#LRR_1#LRR_8#LRR_8#LRR_8#LRR_1#LRR_1#LRR_8#LRR_8#LRR_1#LRR_4	LRR-XI-1	1.2e-93
ZSDa005	ZSDa005_Chr3_gene_325730_mRNA	Chr3	RLK	1	LRRNT_2#LRR_8#LRR_1	LRR-III	6.4e-87
ZSDa005	ZSDa005_Chr17_gene_56600_mRNA	Chr17	RLK	1	B_lectin#S_locus_glycop#PAN_1	SD-2b	1.2e-98
ZSDa005	ZSDa005_Chr18_gene_83060_mRNA	Chr18	RLK	1	Lectin_legB	L-LEC	7.4e-118
ZSDa005	ZSDa005_Chr2_gene_142640_mRNA	Chr2	RLK	1	LRRNT_2#LRR_8	LRR-VI-2	2.3e-94
ZSDa005	ZSDa005_Chr15_gene_276070_mRNA	Chr15	RLK	1	LRRNT_2#LRR_8#LRR_8#LRR_8#LRR_1#LRR_8#LRR_1#LRR_1#LRR_8	LRR-XV	2.6e-125
ZSDa005	ZSDa005_Chr17_gene_58020_mRNA	Chr17	RLK	1	LRRNT_2#LRR_8#LRR_1#LRR_8#LRR_8#LRR_8#LRR_8#LRR_8#LRR_8#LRR_1	LRR-XII-1	1.6e-113
ZSDa005	ZSDa005_Chr18_gene_71990_mRNA	Chr18	RLK	1	LRRNT_2#LRR_8#LRR_4	LRR-III	3.4e-114
ZSDa005	ZSDa005_Chr16_gene_285330_mRNA	Chr16	RLK_WE	1	None	RLCK-X	7.1e-155
ZSDa005	ZSDa005_Chr15_gene_267430_mRNA	Chr15	RLK	1	B_lectin#S_locus_glycop#PAN_2	DLSV	3.7e-119
ZSDa005	ZSDa005_Chr15_gene_267420_mRNA	Chr15	RLK	1	B_lectin#S_locus_glycop#PAN_2	DLSV	8e-117
ZSDa005	ZSDa005_Chr2_gene_153190_mRNA	Chr2	RLK	1	LRR_8#LRR_4#LRR_8#LRR_8#LRR_8#LRR_8#LRR_8	LRR-XII-1	1.7e-105
ZSDa005	ZSDa005_Chr5_gene_98320_mRNA	Chr5	RLK	1	LRRNT_2#LRR_4#LRR_8#LRR_1#LRR_8#LRRNT_2#LRR_8	LRR-IX	4e-142
ZSDa005	ZSDa005_Chr16_gene_289440_mRNA	Chr16	RLK	1	GUB_WAK_bind	LRK10L-2	3.6e-101
ZSDa005	ZSDa005_Chr12_gene_233330_mRNA	Chr12	RLK	1	RCC1_2#RCC1_2#RCC1_2#RCC1_2	CR4L	3e-111
ZSDa005	ZSDa005_Chr18_gene_68260_mRNA	Chr18	RLK	1	LRRNT_2#LRR_8#LRR_8#LRR_1	LRR-III	1.1e-83
ZSDa005	ZSDa005_Chr15_gene_261890_mRNA	Chr15	RLK	1	Lectin_legB	L-LEC	7.2e-120
ZSDa005	ZSDa005_Chr8_gene_120970_mRNA	Chr8	RLK	1	LRR_4#LRR_8#LRR_1	LRR-III	6e-92
ZSDa005	ZSDa005_Chr3_gene_320650_mRNA	Chr3	RLK	1	LRRNT_2#LRR_4#LRR_8#LRR_8#LRR_8#LRR_8#LRR_8#LRR_8	LRR-XI-1	1.1e-97
ZSDa005	ZSDa005_Chr8_gene_135760_mRNA	Chr8	RLK	1	Lectin_legB	L-LEC	2.4e-117
ZSDa005	ZSDa005_Chr2_gene_152510_mRNA	Chr2	RLK	1	LRRNT_2#LRR_4#LRR_1#LRR_8#LRR_8#LRR_8#LRR_4#LRR_8#LRR_8#LRR_1#LRR_8	LRR-XI-1	6.5e-88
ZSDa005	ZSDa005_Chr7_gene_193790_mRNA	Chr7	RLK	1	B_lectin#S_locus_glycop#PAN_2	DLSV	2.9e-120
ZSDa005	ZSDa005_Chr9_gene_25480_mRNA	Chr9	RLK_WE	1	None	LRR-I-2	1.1e-122
ZSDa005	ZSDa005_Chr17_gene_65950_mRNA	Chr17	RLK	1	LRRNT_2#LRR_4#LRR_1#LRR_8#LRR_8#LRR_8#LRR_8#LRR_8#LRR_1#LRR_8	LRR-XII-1	2.3e-120
ZSDa005	ZSDa005_Chr12_gene_232610_mRNA	Chr12	RLK	1	LRRNT_2#LRR_8#LRR_8#LRR_1#LRR_8	LRR-VIII-1	2.7e-131
ZSDa005	ZSDa005_Chr20_gene_107140_mRNA	Chr20	RLK	1	LRR_8#LRR_8#LRR_4#Malectin	DLSV	2.3e-106
ZSDa005	ZSDa005_Chr8_gene_120640_mRNA	Chr8	RLK_WE	1	None	DLSV	3.2e-108
ZSDa005	ZSDa005_Chr5_gene_159950_mRNA	Chr5	RLK	1	LRRNT_2#LRR_8#LRR_1#LRR_1#LRR_8#LRR_1#LRR_8#LRR_8#LRR_8	LRR-XII-1	1.3e-120
ZSDa005	ZSDa005_Chr17_gene_60470_mRNA	Chr17	RLK	1	GUB_WAK_bind	LRK10L-2	2.8e-136
ZSDa005	ZSDa005_Chr4_gene_5380_mRNA	Chr4	RLK	1	Stress-antifung#Stress-antifung#Stress-antifung#Stress-antifung	DLSV	1.3e-120
ZSDa005	ZSDa005_Chr2_gene_144070_mRNA	Chr2	RLK	1	LRRNT_2#LRR_1#LRR_4#LRR_8#LRR_8#LRR_8#LRR_1#LRR_8#LRR_8#LRR_8#LRR_4	LRR-XI-1	3.2e-90
ZSDa005	ZSDa005_Chr15_gene_275490_mRNA	Chr15	RLK	1	B_lectin#S_locus_glycop#PAN_2	DLSV	3.9e-122
ZSDa005	ZSDa005_Chr20_gene_107010_mRNA	Chr20	RLK	1	LRR_8#LRR_1#LRR_4#Malectin	DLSV	1.4e-98
ZSDa005	ZSDa005_Chr9_gene_28420_mRNA	Chr9	RLK	1	lci#B_lectin#S_locus_glycop#PAN_4	SD-2b	3.3e-111
ZSDa005	ZSDa005_Chr19_gene_237290_mRNA	Chr19	RLK	1	LRRNT_2#LRR_1#LRR_8	LRR-V	7e-126
ZSDa005	ZSDa005_Chr11_gene_212510_mRNA	Chr11	RLK	1	LRRNT_2#LRR_8	LRR-III	5.7e-89
ZSDa005	ZSDa005_Chr19_gene_257430_mRNA	Chr19	RLK	1	LRR_4#LRR_8#LRR_4#LRR_4#LRR_8#LRR_8	LRR-III	1.6e-75
ZSDa005	ZSDa005_Chr19_gene_243580_mRNA	Chr19	RLK	1	LRRNT_2#LRR_8#LRR_8#LRR_1#LRR_1#LRR_4#LRR_8#LRR_8#LRR_8	LRR-XII-1	6.1e-96
ZSDa005	ZSDa005_Chr4_gene_5870_mRNA	Chr4	RLK	1	Stress-antifung#Stress-antifung	DLSV	4.9e-109
ZSDa005	ZSDa005_Chr14_gene_169280_mRNA	Chr14	RLK	1	LRR_8#LRR_8#LRR_8#LRR_4#LRR_8#LRR_8#LRR_8#LRR_8	LRR-XI-1	2.2e-106
ZSDa005	ZSDa005_Chr18_gene_83080_mRNA	Chr18	RLK	1	Lectin_legB	L-LEC	3.2e-117
ZSDa005	ZSDa005_Chr12_gene_232890_mRNA	Chr12	RLK	1	LRRNT_2#LRR_1#LRR_8#LRR_1	LRR-III	1.7e-117
ZSDa005	ZSDa005_Chr7_gene_198930_mRNA	Chr7	RLK	1	Malectin_like	CrRLK1L-1	5.5e-149
ZSDa005	ZSDa005_Chr19_gene_238110_mRNA	Chr19	RLK	1	LRR_8#LRR_4#LRR_8#Malectin	DLSV	5.6e-113
ZSDa005	ZSDa005_Chr18_gene_75310_mRNA	Chr18	RLK	1	LRRNT_2#LRR_8#LRR_1#LRR_8#LRR_4#LRR_4#LRR_8#LRR_4	LRR-XII-1	2.1e-77
ZSDa005	ZSDa005_Chr15_gene_267190_mRNA	Chr15	RLK	1	B_lectin#S_locus_glycop#PAN_2	DLSV	1e-119
ZSDa005	ZSDa005_Chr8_gene_121650_mRNA	Chr8	RLK	1	LRR_8#LRR_1	LRR-III	2.8e-56
ZSDa005	ZSDa005_Chr8_gene_127610_mRNA	Chr8	RLK	1	Stress-antifung#Stress-antifung	DLSV	1.7e-122
ZSDa005	ZSDa005_Chr5_gene_168240_mRNA	Chr5	RLK	1	GUB_WAK_bind#WAK#EGF_CA	WAK	3.5e-111
ZSDa005	ZSDa005_Chr9_gene_28360_mRNA	Chr9	RLK	1	GUB_WAK_bind#RANK_CRD_2	WAK_LRK10L-1	2.6e-121
ZSDa005	ZSDa005_Chr16_gene_284630_mRNA	Chr16	RLK	1	LRRNT_2#LRR_8#LRR_8#LRR_1	LRR-V	2.3e-143
ZSDa005	ZSDa005_Chr17_gene_53450_mRNA	Chr17	RLK	1	GUB_WAK_bind#WAK_assoc	LRK10L-2	5.1e-115
ZSDa005	ZSDa005_Chr7_gene_195000_mRNA	Chr7	RLK_WE	1	None	RLCK-IXa	3.4e-118
ZSDa005	ZSDa005_Chr5_gene_89730_mRNA	Chr5	RLK	1	B_lectin#S_locus_glycop#PAN_2	SD-2b	1.3e-108
ZSDa005	ZSDa005_Chr19_gene_239070_mRNA	Chr19	RLK	1	LRR_8#LRR_4#LRR_8	LRR-VIII-1	3.9e-133
ZSDa005	ZSDa005_Chr8_gene_121770_mRNA	Chr8	RLK	1	LRRNT_2#LRR_1#LRR_8	LRR-III	3.8e-68
ZSDa005	ZSDa005_Chr8_gene_130410_mRNA	Chr8	RLK_WE	1	None	RLCK-Os	8.7e-112
ZSDa005	ZSDa005_Chr5_gene_101620_mRNA	Chr5	RLK	1	LRRNT_2#LRR_4	LRR-III	8.1e-75
ZSDa005	ZSDa005_Chr17_gene_58840_mRNA	Chr17	RLK	1	LRRNT_2#LRR_8#LRR_8#LRR_8#LRR_4#LRR_8#LRR_8#LRR_8	LRR-XII-1	7.5e-120
ZSDa005	ZSDa005_Chr5_gene_96910_mRNA	Chr5	RLK	1	GUB_WAK_bind#WAK_assoc	LRK10L-2	4.8e-134
ZSDa005	ZSDa005_Chr13_gene_316080_mRNA	Chr13	RLK	1	Lectin_legB	L-LEC	5.3e-119
ZSDa005	ZSDa005_Chr15_gene_260470_mRNA	Chr15	RLK	1	B_lectin#S_locus_glycop#PAN_2	DLSV	8.9e-128
ZSDa005	ZSDa005_Chr15_gene_260720_mRNA	Chr15	RLK	1	Stress-antifung#Stress-antifung	DLSV	2.5e-124
ZSDa005	ZSDa005_Chr1_gene_341540_mRNA	Chr1	RLK_WE	1	None	Extensin	1.8e-148
ZSDa005	ZSDa005_Chr16_gene_278280_mRNA	Chr16	RLK_WE	1	None	RLCK-XI	1.4e-104
ZSDa005	ZSDa005_Chr13_gene_293290_mRNA	Chr13	RLK	1	LRRNT_2#LRR_8#LRR_8#LRR_8#LRR_1#LRR_8#LRR_8#LRR_8#LRR_8	LRR-Xb-2	2e-118
ZSDa005	ZSDa005_Chr5_gene_90380_mRNA	Chr5	RLK	1	B_lectin#S_locus_glycop#PAN_1	SD-2b	2.2e-109
ZSDa005	ZSDa005_Chr16_gene_289550_mRNA	Chr16	RLK	1	GUB_WAK_bind	LRK10L-2	6.3e-131
ZSDa005	ZSDa005_Chr20_gene_107090_mRNA	Chr20	RLK	1	LRR_8#LRR_4#LRR_8#Malectin	DLSV	2e-35
ZSDa005	ZSDa005_Chr3_gene_329160_mRNA	Chr3	RLK	1	LRRNT_2#LRR_8	LRR-III	9.1e-87
ZSDa005	ZSDa005_Chr9_gene_27230_mRNA	Chr9	RLK	1	LRRNT_2#LRR_8#LRR_4#LRR_8#LRR_1#LRR_8#LRR_8#LRR_1#LRR_8	LRR-VII-1	9.4e-130
ZSDa005	ZSDa005_Chr17_gene_56620_mRNA	Chr17	RLK	1	B_lectin#S_locus_glycop#PAN_4	SD-2b	2.7e-105
ZSDa005	ZSDa005_Chr8_gene_135780_mRNA	Chr8	RLK	1	Lectin_legB	L-LEC	2.1e-118
ZSDa005	ZSDa005_Chr15_gene_267460_mRNA	Chr15	RLK	1	B_lectin#S_locus_glycop#PAN_2	DLSV	1.4e-121
ZSDa005	ZSDa005_Chr14_gene_180150_mRNA	Chr14	RLK	1	B_lectin#PAN_2	SD-2b	6.9e-105
ZSDa005	ZSDa005_Chr4_gene_15790_mRNA	Chr4	RLK_WE	1	None	RLCK-V	2.1e-158
ZSDa005	ZSDa005_Chr15_gene_267490_mRNA	Chr15	RLK	1	B_lectin#S_locus_glycop	DLSV	1.6e-122
ZSDa005	ZSDa005_Chr17_gene_60580_mRNA	Chr17	RLK	1	GUB_WAK_bind	LRK10L-2	8.2e-135
ZSDa005	ZSDa005_Chr4_gene_7540_mRNA	Chr4	RLK	1	LRR_8#LRR_4#LRR_8#LRR_1#LRR_8#LRR_8#LRR_1#LRR_8	LRR-XI-1	3.1e-98
ZSDa005	ZSDa005_Chr17_gene_64930_mRNA	Chr17	RLK	1	B_lectin#S_locus_glycop#PAN_2	SD-2b	1.7e-108
ZSDa005	ZSDa005_Chr15_gene_269170_mRNA	Chr15	RLK	1	B_lectin#S_locus_glycop#PAN_2	SD-2b	6.5e-109
ZSDa005	ZSDa005_Chr15_gene_271240_mRNA	Chr15	RLK	1	LRRNT_2#LRR_8#LRR_8#LRR_8#LRR_4#LRR_4	LRR-XI-1	3.5e-85
ZSDa005	ZSDa005_Chr15_gene_260730_mRNA	Chr15	RLK	1	Stress-antifung#Stress-antifung	DLSV	5.5e-122
ZSDa005	ZSDa005_Chr4_gene_4830_mRNA	Chr4	RLK_WE	1	None	PERK-1	3.2e-148
ZSDa005	ZSDa005_Chr3_gene_320950_mRNA	Chr3	RLK	1	LRRNT_2#LRR_8#LRR_4#LRR_8#LRR_1#LRR_4#LRR_1#LRR_1#LRR_1#LRR_8	LRR-XII-1	1.9e-105
ZSDa005	ZSDa005_Chr14_gene_186370_mRNA	Chr14	RLK	1	LRRNT_2#LRR_8#LRR_8#LRR_8#LRR_8#LRR_1	LRR-VII-1	1.1e-124
ZSDa005	ZSDa005_Chr15_gene_269470_mRNA	Chr15	RLK	1	Stress-antifung	DLSV	2e-87
ZSDa005	ZSDa005_Chr2_gene_142210_mRNA	Chr2	RLK	1	LRRNT_2#LRR_8#LRR_4#LRR_8#LRR_1#LRR_8#LRR_8#LRR_8#LRR_8#LRR_1#LRR_8	LRR-XI-1	2.5e-108
ZSDa005	ZSDa005_Chr17_gene_61480_mRNA	Chr17	RLK_WE	1	None	LRR-XIIIa	6.3e-128
ZSDa005	ZSDa005_Chr13_gene_294110_mRNA	Chr13	RLK	1	Lectin_legB	L-LEC	5.9e-117
ZSDa005	ZSDa005_Chr5_gene_93520_mRNA	Chr5	RLK	1	B_lectin#PAN_1	SD-2b	4.7e-118
ZSDa005	ZSDa005_Chr5_gene_102230_mRNA	Chr5	RLK	1	B_lectin#PAN_2	SD-2b	2.7e-108
ZSDa005	ZSDa005_Chr12_gene_233070_mRNA	Chr12	RLK	1	LRR_4#LRR_1#LRR_8#LRR_8#LRR_8#LRR_8#LRR_8	LRR-XI-1	7e-86
ZSDa005	ZSDa005_Chr20_gene_113980_mRNA	Chr20	RLK_WE	1	None	PERK-1	3.9e-151
ZSDa005	ZSDa005_Chr19_gene_257260_mRNA	Chr19	RLK	1	LRRNT_2#LRR_8#LRR_1	LRR-III	3e-88
ZSDa005	ZSDa005_Chr4_gene_4580_mRNA	Chr4	RLK	1	LRRNT_2#LRR_8#LRR_8#LRR_4#LRR_1#LRR_8#LRR_8#LRR_8#LRR_8#LRR_8	LRR-XI-1	3.1e-117
ZSDa005	ZSDa005_Chr1_gene_340850_mRNA	Chr1	RLK_WE	1	None	RLCK-XVI	1.6e-144
ZSDa005	ZSDa005_Chr12_gene_227930_mRNA	Chr12	RLK	1	B_lectin#S_locus_glycop#PAN_2	SD-2b	3e-95
ZSDa005	ZSDa005_Chr16_gene_278910_mRNA	Chr16	RLK_WE	1	None	RLCK-IV	8.9e-128
ZSDa005	ZSDa005_Chr9_gene_34310_mRNA	Chr9	RLK	1	Malectin_like	CrRLK1L-1	9.1e-148
ZSDa005	ZSDa005_Chr17_gene_59470_mRNA	Chr17	RLK	1	LRRNT_2#LRR_8#LRR_8#LRR_1#LRR_8#LRR_1#LRR_8#LRR_8#LRR_8#LRR_1	LRR-XI-1	2.9e-100
ZSDa005	ZSDa005_Chr5_gene_168130_mRNA	Chr5	RLK	1	B_lectin#PAN_2	SD-2b	4.1e-106
ZSDa005	ZSDa005_Chr8_gene_130440_mRNA	Chr8	RLK_WE	1	None	RLCK-Os	9.2e-133
ZSDa005	ZSDa005_Chr17_gene_57080_mRNA	Chr17	RLK	1	LRRNT_2#LRR_8#LRR_8#LRR_8#LRR_8#LRR_4#LRR_4#LRR_8	LRR-XI-1	9.2e-101
ZSDa005	ZSDa005_Chr5_gene_99400_mRNA	Chr5	RLK	1	Lectin_C	C-LEC	5.8e-140
ZSDa005	ZSDa005_Chr5_gene_97310_mRNA	Chr5	RLK	1	GUB_WAK_bind	LRK10L-2	2.5e-118
ZSDa005	ZSDa005_Chr4_gene_7190_mRNA	Chr4	RLK	1	LRRNT_2#LRR_8#LRR_4	LRR-III	8e-107
ZSDa005	ZSDa005_Chr17_gene_66690_mRNA	Chr17	RLK	2	Kinase#LRRNT_2#LRR_4#LRR_4#LRR_8#LRR_8#LRR_8#LRR_8	LRR-XII-1	3.9e-234
ZSDa005	ZSDa005_Chr20_gene_109930_mRNA	Chr20	RLK	1	LRRNT_2#LRR_8#LRR_8	LRR-III	2.3e-93
ZSDa005	ZSDa005_Chr20_gene_109470_mRNA	Chr20	RLK	1	LRRNT_2#LRR_8#LRR_1#LRR_4	LRR-III	1.9e-105
ZSDa005	ZSDa005_Chr17_gene_66740_mRNA	Chr17	RLK	1	LRR_8#LRR_8#LRR_8#LRR_1#LRR_8#LRR_8#LRR_8#LRR_8	LRR-XII-1	9e-102
ZSDa005	ZSDa005_Chr15_gene_273950_mRNA	Chr15	RLK	1	B_lectin#S_locus_glycop#PAN_2	DLSV	1.2e-122
ZSDa005	ZSDa005_Chr5_gene_101490_mRNA	Chr5	RLK	1	B_lectin#S_locus_glycop#PAN_2	DLSV	7.5e-129
ZSDa005	ZSDa005_Chr17_gene_60570_mRNA	Chr17	RLK	1	GUB_WAK_bind#WAK_assoc	LRK10L-2	2.2e-136
ZSDa005	ZSDa005_Chr7_gene_200310_mRNA	Chr7	RLK	1	Malectin_like	CrRLK1L-1	2e-153
ZSDa005	ZSDa005_Chr18_gene_81540_mRNA	Chr18	RLK	1	LRRNT_2#LRR_8#LRR_8#LRR_8#LRR_1#LRR_8#LRR_8#Island#LRR_1#LRR_8	LRR-Xb-1	1.1e-125
ZSDa005	ZSDa005_Chr3_gene_321040_mRNA	Chr3	RLK	1	LRRNT_2#LRR_8#LRR_8#LRR_8#LRR_1#LRR_8#LRR_8	LRR-VII-2	4.5e-134
ZSDa006	ZSDa006_Chr17_gene_2423500_mRNA	Chr17	RLK	1	LRRNT_2#LRR_8#LRR_1#LRR_8#LRR_4#LRR_8#LRR_8	LRR-XII-1	3.5e-121
ZSDa006	ZSDa006_Chr15_gene_2280300_mRNA	Chr15	RLK	1	Malectin_like	CrRLK1L-1	2.5e-153
ZSDa006	ZSDa006_Chr2_gene_0256800_mRNA	Chr2	RLK	1	LRR_8#LRR_4#LRR_8#LRR_8#LRR_8#LRR_8#LRR_8	LRR-XII-1	6e-107
ZSDa006	ZSDa006_Chr17_gene_2407600_mRNA	Chr17	RLK	1	LRRNT_2#LRR_4#LRR_8#LRR_8#LRR_4#LRR_8#LRR_4#LRR_8	LRR-XII-1	1.5e-85
ZSDa006	ZSDa006_Chr12_gene_1774900_mRNA	Chr12	RLK	1	Malectin_like	CrRLK1L-1	2.2e-140
ZSDa006	ZSDa006_Chr16_gene_2367700_mRNA	Chr16	RLK_WE	1	None	RLCK-X	6.9e-155
ZSDa006	ZSDa006_Chr15_gene_2247600_mRNA	Chr15	RLK	1	Lectin_legB	L-LEC	2e-119
ZSDa006	ZSDa006_Chr4_gene_0531700_mRNA	Chr4	RLK	1	LRRNT_2#LRR_8#LRR_4#LRR_8#LRR_8#LRR_1#LRR_1#LRR_8#LRR_8#LRR_8#LRR_8	LRR-XI-1	2.7e-98
ZSDa006	ZSDa006_Chr13_gene_1817600_mRNA	Chr13	RLK	1	Lectin_legB	L-LEC	2.8e-115
ZSDa006	ZSDa006_Chr7_gene_1113100_mRNA	Chr7	RLK	1	RCC1_2#RCC1_2#RCC1_2#RCC1_2	CR4L	9.5e-115
ZSDa006	ZSDa006_Chr17_gene_2477900_mRNA	Chr17	RLK	1	Lectin_legB	L-LEC	5.8e-114
ZSDa006	ZSDa006_Chr13_gene_1816400_mRNA	Chr13	RLK	1	Lectin_legB	L-LEC	2.1e-112
ZSDa006	ZSDa006_Chr10_gene_1518200_mRNA	Chr10	RLK	1	LRR_8#LRR_1#LRR_8#LRR_8	LRR-XI-1	3.3e-111
ZSDa006	ZSDa006_Chr9_gene_1368200_mRNA	Chr9	RLK_WE	1	None	RLCK-IXa	8.7e-89
ZSDa006	ZSDa006_Chr15_gene_2232200_mRNA	Chr15	RLK	1	Malectin_like#LRR_8	LRR-I-1	1.6e-105
ZSDa006	ZSDa006_Chr5_gene_0823200_mRNA	Chr5	RLK	1	LRRNT_2#LRR_1#LRR_8	LRR-II	1.7e-156
ZSDa006	ZSDa006_Chr15_gene_2145700_mRNA	Chr15	RLK	1	S_locus_glycop#S_locus_glycop#PAN_2	DLSV	1.2e-116
ZSDa006	ZSDa006_Chr8_gene_1158700_mRNA	Chr8	RLK	1	Lectin_legB	L-LEC	1.3e-103
ZSDa006	ZSDa006_Chr1_gene_0002500_mRNA	Chr1	RLK_WE	1	None	RLCK-XVI	1.7e-144
ZSDa006	ZSDa006_Chr20_gene_2983700_mRNA	Chr20	RLK	1	LRR_8#LRR_8#LRR_8#Malectin	DLSV	7.4e-108
ZSDa006	ZSDa006_Chr15_gene_2167400_mRNA	Chr15	RLK	1	B_lectin#S_locus_glycop#PAN_2	DLSV	3.3e-120
ZSDa006	ZSDa006_Chr20_gene_2965700_mRNA	Chr20	RLK_WE	1	None	RLCK-V	4.8e-158
ZSDa006	ZSDa006_Chr17_gene_2425200_mRNA	Chr17	RLK	1	LRRNT_2#LRR_8#LRR_8#LRR_8#LRR_4#LRR_1#LRR_8#LRR_4#LRR_8	LRR-XII-1	5.9e-117
ZSDa006	ZSDa006_Chr18_gene_2550900_mRNA	Chr18	RLK	1	LRRNT_2#LRR_8#LRR_1#LRR_8#LRR_8#LRR_4#LRR_8#LRR_8	LRR-XIIIb	2.9e-155
ZSDa006	ZSDa006_Chr15_gene_2274600_mRNA	Chr15	RLK	1	B_lectin#S_locus_glycop#PAN_2	SD-2b	1.1e-119
ZSDa006	ZSDa006_Chr12_gene_1804200_mRNA	Chr12	RLK	1	Lectin_legB	L-LEC	2e-117
ZSDa006	ZSDa006_Chr8_gene_1316700_mRNA	Chr8	RLK	1	B_lectin#S_locus_glycop#PAN_2	DLSV	3.6e-120
ZSDa006	ZSDa006_Chr4_gene_0545200_mRNA	Chr4	RLK_WE	1	None	RLCK-XI	3.1e-114
ZSDa006	ZSDa006_Chr11_gene_1688300_mRNA	Chr11	RLK	1	LRRNT_2#LRR_1#LRR_1#LRR_8#LRR_8#LRR_4#LRR_8#LRR_4#LRR_4#LRR_8#LRR_8#LRR_8#LRR_8	LRR-XI-1	3.4e-93
ZSDa006	ZSDa006_Chr12_gene_1774600_mRNA	Chr12	RLK	1	Malectin_like	CrRLK1L-1	3.9e-141
ZSDa006	ZSDa006_Chr15_gene_2147500_mRNA	Chr15	RLK	1	B_lectin#S_locus_glycop#PAN_2	DLSV	1.7e-117
ZSDa006	ZSDa006_Chr13_gene_1812000_mRNA	Chr13	RLK	1	LysM#LysM	LysM	9.3e-78
ZSDa006	ZSDa006_Chr13_gene_1817900_mRNA	Chr13	RLK	1	Lectin_legB	L-LEC	1.1e-116
ZSDa006	ZSDa006_Chr17_gene_2445700_mRNA	Chr17	RLK	1	B_lectin#S_locus_glycop#PAN_4	SD-2b	6.9e-105
ZSDa006	ZSDa006_Chr18_gene_2551000_mRNA	Chr18	RLK	1	LRRNT_2#LRR_1#LRR_8#LRR_8#LRR_8#LRR_8#LRR_8	LRR-XII-1	2.2e-110
ZSDa006	ZSDa006_Chr12_gene_1781500_mRNA	Chr12	RLK	1	LRRNT_2#LRR_8	LRR-VI-2	1e-108
ZSDa006	ZSDa006_Chr2_gene_0210300_mRNA	Chr2	RLK	1	LRRNT_2#LRR_8#LRR_4#LRR_8#LRR_1#LRR_8#LRR_4#LRR_8#LRR_8#LRR_1#LRR_8	LRR-XI-1	3e-108
ZSDa006	ZSDa006_Chr5_gene_0723500_mRNA	Chr5	RLK	1	LRRNT_2#LRR_8#LRR_8#LRR_1	LRR-III	1.8e-111
ZSDa006	ZSDa006_Chr17_gene_2445600_mRNA	Chr17	RLK	1	B_lectin#S_locus_glycop#PAN_2	SD-2b	5.7e-109
ZSDa006	ZSDa006_Chr5_gene_0843500_mRNA	Chr5	RLK	1	LRR_1#LRR_4#LRR_4#LRR_1	LRR-V	5.2e-102
ZSDa006	ZSDa006_Chr8_gene_1230200_mRNA	Chr8	RLK	1	LRRNT_2#LRR_4#LRR_4	LRR-III	4.7e-72
ZSDa006	ZSDa006_Chr4_gene_0562800_mRNA	Chr4	RLK	1	EGF_3#EGF_CA	WAK	1.6e-106
ZSDa006	ZSDa006_Chr2_gene_0241500_mRNA	Chr2	RLK	1	LRRNT_2#LRR_8#LRR_8#LRR_1#LRR_4#LRR_4#LRR_8#LRR_8#LRR_4#LRR_8#LRR_4#LRR_4#LRR_8	LRR-XI-1	1.4e-89
ZSDa006	ZSDa006_Chr11_gene_1680600_mRNA	Chr11	RLK	1	LRR_1#LRR_4#LRR_4	LRR-III	3.3e-83
ZSDa006	ZSDa006_Chr4_gene_0519700_mRNA	Chr4	RLK	1	LRRNT_2#LRR_4#LRR_4#LRR_8#LRR_4#LRR_8#LRR_8#LRR_1#Island#LRR_1#LRR_8	LRR-Xb-1	6.3e-123
ZSDa006	ZSDa006_Chr3_gene_0277400_mRNA	Chr3	RLK	1	LRRNT_2#LRR_4#LRR_8#LRR_8#LRR_8#LRR_8#LRR_8#LRR_4	LRR-XI-1	6.2e-98
ZSDa006	ZSDa006_Chr2_gene_0244600_mRNA	Chr2	RLK	1	LRRNT_2#LRR_8#LRR_4#LRR_4#LRR_8#LRR_1#LRR_8#LRR_8#LRR_1#LRR_8	LRR-XI-1	3.3e-85
ZSDa006	ZSDa006_Chr12_gene_1779200_mRNA	Chr12	RLK	1	LRR_8#LRR_8#LRR_8#LRR_8#LRR_4	LRR-XI-1	3e-86
ZSDa006	ZSDa006_Chr15_gene_2274700_mRNA	Chr15	RLK	1	B_lectin#S_locus_glycop#PAN_2	SD-2b	1e-109
ZSDa006	ZSDa006_Chr1_gene_0044900_mRNA	Chr1	RLK	1	LRRNT_2#LRR_1#LRR_1	LRR-VI-2	3.9e-99
ZSDa006	ZSDa006_Chr15_gene_2245500_mRNA	Chr15	RLK	1	LRRNT_2#LRR_8	LRR-XIIIa	8.1e-129
ZSDa006	ZSDa006_Chr2_gene_0242800_mRNA	Chr2	RLK	1	LRRNT_2#LRR_8#LRR_4#LRR_4#LRR_4#LRR_8#LRR_8#LRR_4#LRR_8#LRR_8#LRR_8	LRR-XI-1	4.2e-90
ZSDa006	ZSDa006_Chr4_gene_0491900_mRNA	Chr4	RLK_WE	1	None	PERK-1	1e-77
ZSDa006	ZSDa006_Chr20_gene_2921500_mRNA	Chr20	RLK	1	B_lectin#S_locus_glycop#PAN_2	DLSV	2.5e-124
ZSDa006	ZSDa006_Chr5_gene_0806500_mRNA	Chr5	RLK	1	LRRNT_2#LRR_4#LRR_8#LRR_1	LRR-V	5.3e-143
ZSDa006	ZSDa006_Chr5_gene_0765500_mRNA	Chr5	RLK_WE	1	None	URK-2	8.1e-99
ZSDa006	ZSDa006_Chr2_gene_0238200_mRNA	Chr2	RLK	1	LRRNT_2#LRR_1#LRR_4#LRR_8#LRR_8#LRR_8#LRR_1#LRR_8#LRR_8#LRR_8#LRR_4	LRR-XI-1	1.1e-90
ZSDa006	ZSDa006_Chr13_gene_1818300_mRNA	Chr13	RLK	1	Lectin_legB	L-LEC	1.3e-115
ZSDa006	ZSDa006_Chr14_gene_2058000_mRNA	Chr14	RLK	1	LRRNT_2#LRR_4#LRR_4#LRR_1#LRR_8#LRR_1#LRR_8#LRR_8	LRR-XI-1	2.2e-100
ZSDa006	ZSDa006_Chr8_gene_1312100_mRNA	Chr8	RLK	1	Stress-antifung#Stress-antifung	DLSV	1.1e-123
ZSDa006	ZSDa006_Chr4_gene_0397000_mRNA	Chr4	RLK	1	LRR_8#LRR_8#LRR_8	LRR-IX	3e-122
ZSDa006	ZSDa006_Chr8_gene_1312200_mRNA	Chr8	RLK	1	Stress-antifung#Stress-antifung	DLSV	6.7e-123
ZSDa006	ZSDa006_Chr5_gene_0602600_mRNA	Chr5	RLK	1	TIL	SD-2b	2e-107
ZSDa006	ZSDa006_Chr15_gene_2251600_mRNA	Chr15	RLK	1	B_lectin#S_locus_glycop#PAN_2	DLSV	3.6e-112
ZSDa006	ZSDa006_Chr2_gene_0237700_mRNA	Chr2	RLK	1	LRRNT_2#LRR_4#LRR_1#LRR_8#LRR_8#LRR_8#LRR_1#LRR_8#LRR_8#LRR_8#LRR_8	LRR-XI-1	1.2e-111
ZSDa006	ZSDa006_Chr12_gene_1775600_mRNA	Chr12	RLK	1	LRRNT_2#LRR_1#LRR_8#LRR_1	LRR-III	1.6e-117
ZSDa006	ZSDa006_Chr15_gene_2247700_mRNA	Chr15	RLK	1	Lectin_legB	L-LEC	1.7e-118
ZSDa006	ZSDa006_Chr15_gene_2150300_mRNA	Chr15	RLK	1	B_lectin#S_locus_glycop#PAN_2	DLSV	7.7e-124
ZSDa006	ZSDa006_Chr13_gene_1817700_mRNA	Chr13	RLK	1	Lectin_legB	L-LEC	2.4e-119
ZSDa006	ZSDa006_Chr17_gene_2445900_mRNA	Chr17	RLK	1	B_lectin#S_locus_glycop#PAN_1	SD-2b	1.2e-98
ZSDa006	ZSDa006_Chr14_gene_2107900_mRNA	Chr14	RLK_WE	1	None	IRE1	1.9e-139
ZSDa006	ZSDa006_Chr16_gene_2329400_mRNA	Chr16	RLK_WE	1	None	RLCK-XI	2.4e-120
ZSDa006	ZSDa006_Chr16_gene_2396300_mRNA	Chr16	RLK	1	LRRNT_2#LRR_4#LRR_4#LRR_1#LRR_4#LRR_8#LRR_4#LRR_8#LRR_8#LRR_1#Island#LRR_8	LRR-Xb-1	6.3e-128
ZSDa006	ZSDa006_Chr8_gene_1311700_mRNA	Chr8	RLK	1	Stress-antifung#Stress-antifung	DLSV	2e-120
ZSDa006	ZSDa006_Chr19_gene_2799400_mRNA	Chr19	RLK	1	LysM	LysM	2.1e-81
ZSDa006	ZSDa006_Chr15_gene_2269300_mRNA	Chr15	RLK	1	Stress-antifung#Stress-antifung	DLSV	4.4e-41
ZSDa006	ZSDa006_Chr8_gene_1253400_mRNA	Chr8	RLK_WE	1	None	RLCK-Os	1.6e-145
ZSDa006	ZSDa006_Chr16_gene_2384200_mRNA	Chr16	RLK	1	LRRNT_2#LRR_8#LRR_8#LRR_1#CR_prot_dom_plant	LRR-V	2.2e-143
ZSDa006	ZSDa006_Chr9_gene_1376900_mRNA	Chr9	RLK_WE	1	None	LRR-I-2	1.1e-122
ZSDa006	ZSDa006_Chr15_gene_2273600_mRNA	Chr15	RLK	1	B_lectin#S_locus_glycop#PAN_2	DLSV	1.3e-124
ZSDa006	ZSDa006_Chr18_gene_2619500_mRNA	Chr18	RLK	1	LRRNT_2#LRR_8#LRR_8#LRRNT_2#LRR_8	LRR-IX	3.3e-150
ZSDa006	ZSDa006_Chr15_gene_2149500_mRNA	Chr15	RLK	1	B_lectin#S_locus_glycop#PAN_2	DLSV	2.7e-121
ZSDa006	ZSDa006_Chr5_gene_0747700_mRNA	Chr5	RLK_WE	1	None	PERK-1	2.9e-151
ZSDa006	ZSDa006_Chr2_gene_0238600_mRNA	Chr2	RLK	1	LRRNT_2#LRR_8#LRR_4#LRR_4#LRR_8#LRR_8#LRR_1#LRR_8#LRR_8#LRR_8#LRR_8#LRR_8	LRR-XI-1	5.3e-89
ZSDa006	ZSDa006_Chr4_gene_0481100_mRNA	Chr4	RLK_WE	1	None	RLCK-V	2e-158
ZSDa006	ZSDa006_Chr2_gene_0181400_mRNA	Chr2	RLK_WE	1	None	RLCK-IXa	2e-114
ZSDa006	ZSDa006_Chr18_gene_2567500_mRNA	Chr18	RLK	1	Lectin_legB	L-LEC	1.9e-117
ZSDa006	ZSDa006_Chr8_gene_1312600_mRNA	Chr8	RLK	1	Stress-antifung#Stress-antifung	DLSV	8.2e-123
ZSDa006	ZSDa006_Chr15_gene_2268900_mRNA	Chr15	RLK	1	Stress-antifung#Stress-antifung	DLSV	2.2e-112
ZSDa006	ZSDa006_Chr4_gene_0493000_mRNA	Chr4	RLK	1	LysM	LysM	3.7e-95
ZSDa006	ZSDa006_Chr3_gene_0326300_mRNA	Chr3	RLK_WE	1	None	URK-2	3.6e-102
ZSDa006	ZSDa006_Chr8_gene_1228700_mRNA	Chr8	RLK	1	LRRNT_2#LRR_8#LRR_1	LRR-III	9.9e-80
ZSDa006	ZSDa006_Chr5_gene_0758700_mRNA	Chr5	RLK	1	Malectin_like#LRR_4	LRR-I-1	3.4e-104
ZSDa006	ZSDa006_Chr8_gene_1158900_mRNA	Chr8	RLK	1	Lectin_legB	L-LEC	2.7e-100
ZSDa006	ZSDa006_Chr20_gene_2924400_mRNA	Chr20	RLK	1	B_lectin#S_locus_glycop#PAN_2	DLSV	3.5e-124
ZSDa006	ZSDa006_Chr16_gene_2390500_mRNA	Chr16	RLK	1	Lectin_legB	L-LEC	8.8e-108
ZSDa006	ZSDa006_Chr8_gene_1187300_mRNA	Chr8	RLK	1	Bact_lectin	L-LEC	3.3e-108
ZSDa006	ZSDa006_Chr5_gene_0744400_mRNA	Chr5	RLK	1	GUB_WAK_bind#zf-Dof	LRK10L-2	2.5e-129
ZSDa006	ZSDa006_Chr15_gene_2268600_mRNA	Chr15	RLK	1	Stress-antifung	DLSV	2.5e-93
ZSDa006	ZSDa006_Chr14_gene_2104100_mRNA	Chr14	RLK	1	GUB_WAK_bind	URK-3	6.5e-49
ZSDa006	ZSDa006_Chr6_gene_0958200_mRNA	Chr6	RLK	1	LRRNT_2#LRR_8#LRR_1#LRR_4	LRR-III	5.6e-32
ZSDa006	ZSDa006_Chr15_gene_2273900_mRNA	Chr15	RLK	1	B_lectin#S_locus_glycop#PAN_2	DLSV	8.1e-128
ZSDa006	ZSDa006_Chr18_gene_2587100_mRNA	Chr18	RLK	1	B_lectin#S_locus_glycop#PAN_1	SD-2b	6.6e-108
ZSDa006	ZSDa006_Chr4_gene_0433900_mRNA	Chr4	RLK_WE	1	None	RLCK-V	1e-155
ZSDa006	ZSDa006_Chr19_gene_2789300_mRNA	Chr19	RLK	1	Stress-antifung#Stress-antifung	DLSV	5e-107
ZSDa006	ZSDa006_Chr1_gene_0024800_mRNA	Chr1	RLK	1	LRRNT_2#LRR_1#LRR_1	LRR-VI-2	3.9e-99
ZSDa006	ZSDa006_Chr20_gene_2984700_mRNA	Chr20	RLK	1	LRR_8#LRR_1#LRR_4#LRR_8#Malectin	DLSV	2e-35
ZSDa006	ZSDa006_Chr19_gene_2798200_mRNA	Chr19	RLK	1	Malectin_like	CrRLK1L-1	1.9e-126
ZSDa006	ZSDa006_Chr7_gene_1134900_mRNA	Chr7	RLK	1	B_lectin#S_locus_glycop#PAN_1	SD-2b	4.1e-102
ZSDa006	ZSDa006_Chr8_gene_1230600_mRNA	Chr8	RLK	1	LRR_1#LRR_8	LRR-III	3e-82
ZSDa006	ZSDa006_Chr7_gene_0971300_mRNA	Chr7	RLK	1	LRRNT_2#LRR_1#LRR_1	LRR-VI-2	3.9e-99
ZSDa006	ZSDa006_Chr18_gene_2548100_mRNA	Chr18	RLK	1	LRRNT_2#LRR_8#LRR_8#LRR_1	LRR-III	5.1e-91
ZSDa006	ZSDa006_Chr16_gene_2363800_mRNA	Chr16	RLK_WE	1	None	LRK10L-2	7.8e-112
ZSDa006	ZSDa006_Chr2_gene_0243300_mRNA	Chr2	RLK	1	LRRNT_2#LRR_8#LRR_1#LRR_8#LRR_1#LRR_4#LRR_8#LRR_8#LRR_1#LRR_8#LRR_4#LRR_1#LRR_8	LRR-XI-1	4e-90
ZSDa006	ZSDa006_Chr5_gene_0844100_mRNA	Chr5	RLK	1	B_lectin#PAN_2	SD-2b	2e-100
ZSDa006	ZSDa006_Chr8_gene_1290200_mRNA	Chr8	RLK	1	LRRNT_2#LRR_4#LRR_4	LRR-III	1.3e-69
ZSDa006	ZSDa006_Chr17_gene_2537600_mRNA	Chr17	RLK	1	LRRNT_2#LRR_8#LRR_8#LRR_1#LRR_8#LRR_8#LRR_8#LRR_8#LRR_8#LRR_1	LRR-XI-1	2.8e-100
ZSDa006	ZSDa006_Chr15_gene_2147100_mRNA	Chr15	RLK	1	B_lectin#S_locus_glycop#PAN_2	DLSV	5.5e-122
ZSDa006	ZSDa006_Chr2_gene_0237900_mRNA	Chr2	RLK	1	LRRNT_2#LRR_1#LRR_8#LRR_8#LRR_8#LRR_8#LRR_8#LRR_8#LRR_4#LRR_8	LRR-XI-1	3.6e-89
ZSDa006	ZSDa006_Chr8_gene_1311900_mRNA	Chr8	RLK	1	Stress-antifung#Stress-antifung	DLSV	2.3e-106
ZSDa006	ZSDa006_Chr8_gene_1160200_mRNA	Chr8	RLK	1	LRR_4#LRR_8#LRR_1#LRR_8#LRR_4#LRR_8#LRR_8#LRR_1	LRR-XI-1	1.8e-109
ZSDa006	ZSDa006_Chr3_gene_0376100_mRNA	Chr3	RLK	1	LRRNT_2#LRR_1#LRR_8#LRR_1	LRR-III	3e-87
ZSDa006	ZSDa006_Chr19_gene_2853400_mRNA	Chr19	RLK	1	SPARK	RKF3	3.7e-108
ZSDa006	ZSDa006_Chr5_gene_0697300_mRNA	Chr5	RLK_WE	1	None	Extensin	1e-150
ZSDa006	ZSDa006_Chr15_gene_2268700_mRNA	Chr15	RLK	1	Stress-antifung#Stress-antifung	DLSV	6.4e-126
ZSDa006	ZSDa006_Chr8_gene_1253300_mRNA	Chr8	RLK_WE	2	None	RLCK-Os	1.7e-115
ZSDa006	ZSDa006_Chr5_gene_0753900_mRNA	Chr5	RLK	1	LRR_8#LRR_8#LRR_8#LRR_1#LRR_8#LRR_8#LRR_1#LRR_8	LRR-XII-1	5.6e-116
ZSDa006	ZSDa006_Chr14_gene_2120900_mRNA	Chr14	RLK	1	LRR_8#LRR_1	LRR-III	1.3e-99
ZSDa006	ZSDa006_Chr19_gene_2891800_mRNA	Chr19	RLK_WE	1	None	LRR-XI-1	1.5e-76
ZSDa006	ZSDa006_Chr10_gene_1532900_mRNA	Chr10	RLK	1	LRR_1#LRR_8#LRR_1#LRR_8	LRR-VI-1	5.5e-103
ZSDa006	ZSDa006_Chr2_gene_0240800_mRNA	Chr2	RLK	1	LRR_8#LRR_4#LRR_8#LRR_8#LRR_1#LRR_4#LRR_4#LRR_8#LRR_1#LRR_8#LRR_8#LRR_8	LRR-XI-1	6.7e-89
ZSDa006	ZSDa006_Chr12_gene_1806400_mRNA	Chr12	RLK	1	B_lectin#S_locus_glycop#PAN_2	SD-2b	3.2e-95
ZSDa006	ZSDa006_Chr5_gene_0677200_mRNA	Chr5	RLK	1	B_lectin#PAN_1	SD-2b	2e-118
ZSDa006	ZSDa006_Chr13_gene_1820400_mRNA	Chr13	RLK	1	LRRNT_2#LRR_4#LRR_8#LRR_8#LRR_8	LRR-XIV	5.6e-144
ZSDa006	ZSDa006_Chr5_gene_0814000_mRNA	Chr5	RLK	1	LRRNT_2#LRR_8#LRR_4#LRR_8#LRRNT_2#LRR_4	LRR-IX	7.6e-166
ZSDa006	ZSDa006_Chr10_gene_1532600_mRNA	Chr10	RLK	1	LRRNT_2#LRR_8#LRR_8	LRR-III	6.1e-90
ZSDa006	ZSDa006_Chr5_gene_0713900_mRNA	Chr5	RLK	1	LRRNT_2#LRR_8#LRR_8#LRR_8#LRR_4#LRR_1#LRR_8#LRR_1#LRR_8	LRR-XI-1	2.7e-113
ZSDa006	ZSDa006_Chr13_gene_1812400_mRNA	Chr13	RLK	1	Lectin_legB	L-LEC	1.9e-116
ZSDa006	ZSDa006_Chr12_gene_1700100_mRNA	Chr12	RLK_WE	1	None	Extensin	6.2e-146
ZSDa006	ZSDa006_Chr19_gene_2736200_mRNA	Chr19	RLK	1	LRR_4#LRR_8#LRR_4#LRR_4#LRR_8#LRR_8	LRR-III	2.2e-75
ZSDa006	ZSDa006_Chr8_gene_1317200_mRNA	Chr8	RLK	1	S_locus_glycop#PAN_2	SD-2b	1.7e-122
ZSDa006	ZSDa006_Chr8_gene_1318000_mRNA	Chr8	RLK	1	B_lectin#S_locus_glycop#PAN_2	SD-2b	1e-124
ZSDa006	ZSDa006_Chr8_gene_1317100_mRNA	Chr8	RLK	1	B_lectin#S_locus_glycop#PAN_2	SD-2b	6.7e-122
ZSDa006	ZSDa006_Chr20_gene_2984900_mRNA	Chr20	RLK	1	LRR_8#LRR_4#LRR_4#Malectin	DLSV	2.7e-106
ZSDa006	ZSDa006_Chr5_gene_0603000_mRNA	Chr5	RLK	1	B_lectin#S_locus_glycop#PAN_2	SD-2b	2.6e-108
ZSDa006	ZSDa006_Chr15_gene_2147200_mRNA	Chr15	RLK	1	S_locus_glycop#PAN_2	DLSV	1.4e-122
ZSDa006	ZSDa006_Chr4_gene_0488600_mRNA	Chr4	RLK	1	Stress-antifung#Stress-antifung#Stress-antifung#Stress-antifung	DLSV	1.2e-119
ZSDa006	ZSDa006_Chr2_gene_0139100_mRNA	Chr2	RLK_WE	1	None	RLCK-V	2e-148
ZSDa006	ZSDa006_Chr15_gene_2273700_mRNA	Chr15	RLK	1	B_lectin#S_locus_glycop#PAN_2	DLSV	3.6e-123
ZSDa006	ZSDa006_Chr5_gene_0670400_mRNA	Chr5	RLK	1	LysM#LysM	LysM	7.1e-86
ZSDa006	ZSDa006_Chr8_gene_1312300_mRNA	Chr8	RLK	1	Stress-antifung#Stress-antifung	DLSV	3.8e-123
ZSDa006	ZSDa006_Chr5_gene_0832800_mRNA	Chr5	RLK	1	LRRNT_2#LRR_4	LRR-III	9.7e-75
ZSDa006	ZSDa006_Chr15_gene_2147400_mRNA	Chr15	RLK	1	B_lectin#S_locus_glycop#PAN_2	DLSV	6.9e-109
ZSDa006	ZSDa006_Chr5_gene_0737900_mRNA	Chr5	RLK	1	GUB_WAK_bind#WAK_assoc	LRK10L-2	4.3e-128
ZSDa006	ZSDa006_Chr8_gene_1225100_mRNA	Chr8	RLK	2	LRRNT_2#LRR_8#LRR_8	LRR-III	7.8e-74
ZSDa006	ZSDa006_Chr20_gene_3013500_mRNA	Chr20	RLK	1	LRR_8#LRR_1#LRR_8#LRR_1	LRR-XI-1	8.3e-112
ZSDa006	ZSDa006_Chr9_gene_1417400_mRNA	Chr9	RLK	1	Malectin_like	CrRLK1L-1	8.9e-148
ZSDa006	ZSDa006_Chr2_gene_0238300_mRNA	Chr2	RLK	1	LRRNT_2#LRR_8#LRR_8#LRR_1#LRR_8#LRR_1#LRR_8#LRR_8#LRR_4#LRR_1#LRR_8	LRR-XI-1	9.6e-66
ZSDa006	ZSDa006_Chr5_gene_0656400_mRNA	Chr5	RLK	1	RCC1_2#RCC1_2#RCC1_2#RCC1_2	CR4L	9.4e-106
ZSDa006	ZSDa006_Chr5_gene_0745000_mRNA	Chr5	RLK_WE	1	None	LRK10L-2	2.9e-107
ZSDa006	ZSDa006_Chr2_gene_0249800_mRNA	Chr2	RLK	1	LRRNT_2#LRR_4#LRR_8#LRR_1#LRR_8#LRR_1#LRR_1#LRR_8#LRR_8#LRR_8#LRR_1#LRR_4	LRR-XI-1	5.2e-94
ZSDa006	ZSDa006_Chr15_gene_2234800_mRNA	Chr15	RLK	1	LRRNT_2#LRR_8#LRR_8#LRR_8#LRR_4#LRR_4	LRR-XI-1	3.4e-85
ZSDa006	ZSDa006_Chr17_gene_2506300_mRNA	Chr17	RLK	1	LRRNT_2#LRR_8#LRR_1	LRR-III	2e-98
ZSDa006	ZSDa006_Chr15_gene_2172200_mRNA	Chr15	RLK	1	LRRNT_2#LRR_8#LRR_8#LRR_8#LRR_1#LRR_4#LRR_6#LRR_8	LRR-III	2.6e-83
ZSDa006	ZSDa006_Chr9_gene_1419100_mRNA	Chr9	RLK	1	Malectin_like	CrRLK1L-1	2.1e-146
ZSDa006	ZSDa006_Chr13_gene_1816800_mRNA	Chr13	RLK	1	Lectin_legB	L-LEC	1.7e-113
ZSDa006	ZSDa006_Chr8_gene_1297400_mRNA	Chr8	RLK	1	Lectin_legB	L-LEC	1.7e-117
ZSDa006	ZSDa006_Chr15_gene_2146900_mRNA	Chr15	RLK	1	B_lectin#S_locus_glycop#PAN_2	DLSV	5.3e-123
ZSDa006	ZSDa006_Chr16_gene_2379100_mRNA	Chr16	RLK_WE	1	None	RLCK-XI	1.9e-104
ZSDa006	ZSDa006_Chr14_gene_2114600_mRNA	Chr14	RLK	1	LRRNT_2#LRR_8#LRR_1#LRR_8#LRR_1#LRR_8#LRR_4#LRR_8#LRR_1#LRR_8#LRR_8#LRR_8	LRR-VII-3	9.2e-114
ZSDa006	ZSDa006_Chr7_gene_1098900_mRNA	Chr7	RLK	1	Malectin_like	CrRLK1L-1	2e-153
ZSDa006	ZSDa006_Chr5_gene_0683200_mRNA	Chr5	RLK	1	LRRNT_2#LRR_8#LRR_4	LRR-III	4.5e-103
ZSDa006	ZSDa006_Chr13_gene_1816500_mRNA	Chr13	RLK	1	Lectin_legB	L-LEC	1.6e-117
ZSDa006	ZSDa006_Chr17_gene_2529100_mRNA	Chr17	RLK_WE	1	None	PERK-1	2.6e-130
ZSDa006	ZSDa006_Chr17_gene_2406800_mRNA	Chr17	RLK_WE	1	None	SD-2b	4.2e-101
ZSDa006	ZSDa006_Chr2_gene_0137200_mRNA	Chr2	RLK	1	LRRNT_2#LRR_8#LRR_8#LRR_8	LRR-XIV	1.2e-144
ZSDa006	ZSDa006_Chr9_gene_1409700_mRNA	Chr9	RLK	1	LRRNT_2#LRR_8#LRR_8#LRR_8#LRR_8	LRR-III	2.8e-93
ZSDa006	ZSDa006_Chr15_gene_2213100_mRNA	Chr15	RLK	1	B_lectin#S_locus_glycop#PAN_2	SD-2b	2.4e-101
ZSDa006	ZSDa006_Chr17_gene_2507100_mRNA	Chr17	RLK	1	GUB_WAK_bind#WAK_assoc	LRK10L-2	3.3e-112
ZSDa006	ZSDa006_Chr9_gene_1428200_mRNA	Chr9	RLK	1	lci#B_lectin#S_locus_glycop#PAN_4	SD-2b	1.3e-111
ZSDa006	ZSDa006_Chr18_gene_2675800_mRNA	Chr18	RLK	1	Lectin_legB	L-LEC	5.5e-120
ZSDa006	ZSDa006_Chr8_gene_1317400_mRNA	Chr8	RLK	1	B_lectin#S_locus_glycop#PAN_2	SD-2b	2.8e-120
ZSDa006	ZSDa006_Chr17_gene_2423400_mRNA	Chr17	RLK	1	LRRNT_2#LRR_4#LRR_1#LRR_8#LRR_8#LRR_8#LRR_8#LRR_8#LRR_1#LRR_8	LRR-XII-1	1.8e-120
ZSDa006	ZSDa006_Chr2_gene_0183100_mRNA	Chr2	RLK	1	LRRNT_2#LRR_8#LRR_4#LRR_4#LRR_8#LRR_8#LRR_8#LRR_8#LRR_8#LRR_8	LRR-XI-1	3e-87
ZSDa006	ZSDa006_Chr18_gene_2675500_mRNA	Chr18	RLK	1	Lectin_legB	L-LEC	4.7e-118
ZSDa006	ZSDa006_Chr1_gene_0095100_mRNA	Chr1	RLK	1	LRRNT_2#LRR_1#LRR_4#LRR_8#LRR_4#LRR_8#LRR_4#LRR_8#LRR_1	LRR-XIIIb	4.3e-151
ZSDa006	ZSDa006_Chr14_gene_1995800_mRNA	Chr14	RLK	1	B_lectin#PAN_2	SD-2b	1.3e-105
ZSDa006	ZSDa006_Chr5_gene_0616400_mRNA	Chr5	RLK	1	LRRNT_2#LRR_8#LRR_1	LRR-Xa	4.6e-119
ZSDa006	ZSDa006_Chr14_gene_2117800_mRNA	Chr14	RLK	1	LRRNT_2#LRR_8#LRR_8#LRR_1	LRR-IV	1e-132
ZSDa006	ZSDa006_Chr14_gene_2062800_mRNA	Chr14	RLK	1	LRRNT_2#LRR_4#LRR_8	LRR-Xa	2e-136
ZSDa006	ZSDa006_Chr4_gene_0420300_mRNA	Chr4	RLK	1	LRRNT_2#LRR_8#LRR_8#LRR_8#LRR_1#LRR_1#LRR_1#LRR_8#LRR_1#LRR_4	LRR-XI-1	1.7e-101
ZSDa006	ZSDa006_Chr10_gene_1498200_mRNA	Chr10	RLK	1	Lectin_legB	L-LEC	2.4e-120
ZSDa006	ZSDa006_Chr5_gene_0594000_mRNA	Chr5	RLK	1	LRRNT_2#LRR_4#LRR_4	LRR-III	6.5e-108
ZSDa006	ZSDa006_Chr11_gene_1653300_mRNA	Chr11	RLK	1	LRRNT_2#LRR_8#LRR_1	LRR-III	5.5e-89
ZSDa006	ZSDa006_Chr17_gene_2451400_mRNA	Chr17	RLK	1	LRRNT_2#LRR_8#LRR_1#LRR_1#LRR_8#LRR_1#LRR_8#LRR_8#LRR_8#LRR_8#LRR_8	LRR-XII-1	5.6e-120
ZSDa006	ZSDa006_Chr4_gene_0441000_mRNA	Chr4	RLK	1	LRRNT_2#LRR_8#LRR_8#LRR_8#LRRNT_2#LRR_8	LRR-IX	4.5e-151
ZSDa006	ZSDa006_Chr15_gene_2268300_mRNA	Chr15	RLK	1	Stress-antifung#Stress-antifung	DLSV	8.1e-125
ZSDa006	ZSDa006_Chr8_gene_1253600_mRNA	Chr8	RLK_WE	1	None	RLCK-Os	1.6e-134
ZSDa006	ZSDa006_Chr5_gene_0681100_mRNA	Chr5	RLK	1	LRRNT_2#LRR_8#LRR_1#LRR_1#LRR_8#LRR_1#LRR_8#LRR_8#LRR_8	LRR-XII-1	1.1e-119
ZSDa006	ZSDa006_Chr5_gene_0622200_mRNA	Chr5	RLK_WE	1	None	LRR-Xb-1	1.8e-101
ZSDa006	ZSDa006_Chr17_gene_2424000_mRNA	Chr17	RLK	1	LRRNT_2#LRR_8#LRR_8#LRR_8#LRR_8#LRR_8#LRR_8#LRR_1#LRR_8	LRR-XII-1	2e-121
ZSDa006	ZSDa006_Chr5_gene_0785500_mRNA	Chr5	RLK	1	LysM	LysM	4.7e-99
ZSDa006	ZSDa006_Chr10_gene_1522500_mRNA	Chr10	RLK	2	LRR_4	LRR-VIII-1	5.7e-254
ZSDa006	ZSDa006_Chr19_gene_2817200_mRNA	Chr19	RLK_WE	1	None	LysM	1.3e-97
ZSDa006	ZSDa006_Chr9_gene_1324800_mRNA	Chr9	RLK	1	LRR_8#LRR_1	LRR-III	4.3e-99
ZSDa006	ZSDa006_Chr18_gene_2684300_mRNA	Chr18	RLK	1	LRRNT_2#LRR_8#LRR_8#LRR_1#LRR_4#LRR_4#LRR_8#LRR_4	LRR-XII-1	2.4e-77
ZSDa006	ZSDa006_Chr5_gene_0789400_mRNA	Chr5	RLK	1	Lectin_C	C-LEC	6e-140
ZSDa006	ZSDa006_Chr13_gene_1819300_mRNA	Chr13	RLK	1	LRRNT_2#LRR_8#LRR_8#LRR_1#LRR_8#LRR_8#LRR_8#LRR_8#LRR_8	LRR-XI-1	1.4e-119
ZSDa006	ZSDa006_Chr17_gene_2518700_mRNA	Chr17	RLK	1	GUB_WAK_bind	LRK10L-2	4.5e-136
ZSDa006	ZSDa006_Chr4_gene_0545300_mRNA	Chr4	RLK	1	Lectin_legB	L-LEC	4.7e-117
ZSDa006	ZSDa006_Chr14_gene_2044200_mRNA	Chr14	RLK	1	SPARK	URK-1	3.6e-148
ZSDa006	ZSDa006_Chr15_gene_2175400_mRNA	Chr15	RLK	1	B_lectin#S_locus_glycop#PAN_2	DLSV	3.6e-122
ZSDa006	ZSDa006_Chr7_gene_1013500_mRNA	Chr7	RLK_WE	1	None	RLCK-IXa	1.8e-56
ZSDa006	ZSDa006_Chr17_gene_2422500_mRNA	Chr17	RLK	1	LRR_8#LRR_8	LRR-VI-1	8.8e-100
ZSDa006	ZSDa006_Chr15_gene_2273300_mRNA	Chr15	RLK	1	B_lectin#S_locus_glycop#PAN_2	DLSV	2.1e-126
ZSDa006	ZSDa006_Chr8_gene_1321600_mRNA	Chr8	RLK	1	LRRNT_2#LRR_1#LRR_8#LRR_4	LRR-V	2.6e-116
ZSDa006	ZSDa006_Chr7_gene_1036900_mRNA	Chr7	RLK	1	LRRNT_2#LRR_1#LRR_1	LRR-VI-2	3.9e-99
ZSDa006	ZSDa006_Chr1_gene_0030300_mRNA	Chr1	RLK	1	LRR_8	LRR-XI-1	1e-91
ZSDa006	ZSDa006_Chr19_gene_2869800_mRNA	Chr19	RLK	1	LRR_4#LRR_4#LRR_8#LRR_1#Malectin	DLSV	6.8e-111
ZSDa006	ZSDa006_Chr19_gene_2869500_mRNA	Chr19	RLK	1	LRR_8#LRR_8#Malectin	DLSV	8.7e-113
ZSDa006	ZSDa006_Chr13_gene_1832200_mRNA	Chr13	RLK	1	LRRNT_2#LRR_8#LRR_8#LRR_8#LRR_1#LRR_8#LRR_8#LRR_1#LRR_8#LRR_8	LRR-Xb-2	1.6e-118
ZSDa006	ZSDa006_Chr15_gene_2148200_mRNA	Chr15	RLK	1	B_lectin#S_locus_glycop#PAN_2	DLSV	3.9e-121
ZSDa006	ZSDa006_Chr12_gene_1785200_mRNA	Chr12	RLK	1	RCC1_2#RCC1_2#RCC1_2#RCC1_2	CR4L	3.7e-111
ZSDa006	ZSDa006_Chr8_gene_1232500_mRNA	Chr8	RLK	1	LRRNT_2#LRR_8	LRR-III	2.4e-64
ZSDa006	ZSDa006_Chr7_gene_1132600_mRNA	Chr7	RLK	1	B_lectin#S_locus_glycop#PAN_2	SD-2b	1e-104
ZSDa006	ZSDa006_Chr15_gene_2275300_mRNA	Chr15	RLK	1	B_lectin#S_locus_glycop#PAN_2	SD-2b	6.1e-125
ZSDa006	ZSDa006_Chr5_gene_0663500_mRNA	Chr5	RLK	1	LRR_4#LRR_8	LRR-XI-2	5.3e-98
ZSDa006	ZSDa006_Chr13_gene_1859000_mRNA	Chr13	RLK	1	LRR_8#LRR_8#LRR_8#Malectin	DLSV	8.4e-109
ZSDa006	ZSDa006_Chr4_gene_0531800_mRNA	Chr4	RLK	1	LRR_8#LRR_4#LRR_8#LRR_1#LRR_8#LRR_8#LRR_1#LRR_8#LRR_8#LRR_1#LRR_8	LRR-XI-1	6.5e-97
ZSDa006	ZSDa006_Chr14_gene_1959600_mRNA	Chr14	RLK_WE	1	None	Extensin	1.6e-146
ZSDa006	ZSDa006_Chr7_gene_1013300_mRNA	Chr7	RLK_WE	1	None	RLCK-IXa	1.5e-118
ZSDa006	ZSDa006_Chr3_gene_0327900_mRNA	Chr3	RLK	1	LRRNT_2#LRR_4#LRR_1	LRR-III	1.2e-79
ZSDa006	ZSDa006_Chr15_gene_2145300_mRNA	Chr15	RLK	1	B_lectin#S_locus_glycop#PAN_2	DLSV	3e-118
ZSDa006	ZSDa006_Chr13_gene_1818600_mRNA	Chr13	RLK	1	Lectin_legB	L-LEC	4.1e-117
ZSDa006	ZSDa006_Chr17_gene_2448500_mRNA	Chr17	RLK	1	LRR_8#LRR_8	LRR-VII-2	2.3e-74
ZSDa006	ZSDa006_Chr17_gene_2451000_mRNA	Chr17	RLK	1	LRRNT_2#LRR_8#LRR_1#LRR_8#LRR_1#LRR_8#LRR_8#LRR_8#LRR_4#LRR_8	LRR-XII-1	4e-111
ZSDa006	ZSDa006_Chr7_gene_1121000_mRNA	Chr7	RLK	1	Malectin_like	CrRLK1L-1	5.4e-149
ZSDa006	ZSDa006_Chr20_gene_2924500_mRNA	Chr20	RLK	1	B_lectin#S_locus_glycop#PAN_2	DLSV	3.6e-124
ZSDa006	ZSDa006_Chr3_gene_0308300_mRNA	Chr3	RLK	1	LRRNT_2#LRR_8	LRR-III	8.9e-87
ZSDa006	ZSDa006_Chr16_gene_2390400_mRNA	Chr16	RLK	1	Lectin_legB	L-LEC	9.4e-108
ZSDa006	ZSDa006_Chr17_gene_2539300_mRNA	Chr17	RLK	1	LRRNT_2#LRR_4#LRR_8	LRR-II	1.5e-152
ZSDa006	ZSDa006_Chr20_gene_3009000_mRNA	Chr20	RLK	1	LRRNT_2#LRR_8	LRR-VI-2	6.6e-107
ZSDa006	ZSDa006_Chr8_gene_1158800_mRNA	Chr8	RLK	1	Lectin_legB	L-LEC	2.3e-117
ZSDa006	ZSDa006_Chr5_gene_0744600_mRNA	Chr5	RLK	1	GUB_WAK_bind	LRK10L-2	3.3e-129
ZSDa006	ZSDa006_Chr14_gene_2074600_mRNA	Chr14	RLK_WE	1	None	LRR-XI-2	1.7e-81
ZSDa006	ZSDa006_Chr16_gene_2366200_mRNA	Chr16	RLK_WE	1	None	RLCK-IV	8.7e-128
ZSDa006	ZSDa006_Chr2_gene_0181600_mRNA	Chr2	RLK_WE	1	None	RLCK-IXa	1.4e-62
ZSDa006	ZSDa006_Chr20_gene_2988100_mRNA	Chr20	RLK_WE	1	None	PERK-1	3.8e-151
ZSDa006	ZSDa006_Chr5_gene_0615000_mRNA	Chr5	RLK	1	B_lectin#S_locus_glycop#PAN_1	SD-2b	1.3e-108
ZSDa006	ZSDa006_Chr5_gene_0656300_mRNA	Chr5	RLK	1	LRRNT_2#LRR_8#LRR_8#LRR_8#LRR_4#LRR_1#LRR_8#LRR_4#LRR_8	LRR-XI-1	4.4e-82
ZSDa006	ZSDa006_Chr2_gene_0238400_mRNA	Chr2	RLK	1	LRRNT_2#LRR_8#LRR_4#LRR_4#LRR_4#LRR_1#LRR_4#LRR_8#LRR_8#LRR_8	LRR-XI-1	1.2e-88
ZSDa006	ZSDa006_Chr12_gene_1779400_mRNA	Chr12	RLK	1	LRR_8#LRR_1#LRR_8#LRR_4#LRR_8#LRR_4#LRR_8#LRR_8#LRR_8#LRR_1#LRR_8	LRR-XI-1	1.3e-87
ZSDa006	ZSDa006_Chr15_gene_2184700_mRNA	Chr15	RLK	1	LRRNT_2#LRR_8#LRR_8#LRR_8#LRR_8#LRR_8#LRR_4#LRR_4#LRR_8#LRR_8#LRR_8	LRR-XI-1	9.6e-111
ZSDa006	ZSDa006_Chr5_gene_0738200_mRNA	Chr5	RLK	1	GUB_WAK_bind#WAK_assoc	WAK_LRK10L-1	5.2e-128
ZSDa006	ZSDa006_Chr8_gene_1312400_mRNA	Chr8	RLK	1	Stress-antifung#Stress-antifung	DLSV	4.2e-123
ZSDa006	ZSDa006_Chr8_gene_1316800_mRNA	Chr8	RLK	1	B_lectin#S_locus_glycop#PAN_2	DLSV	6.9e-128
ZSDa006	ZSDa006_Chr17_gene_2408900_mRNA	Chr17	RLK	1	LRRNT_2#LRR_8#LRR_8#LRR_1#LRR_8#LRR_8#LRR_8#LRR_8#LRR_8	LRR-XII-1	6.2e-122
ZSDa006	ZSDa006_Chr3_gene_0270100_mRNA	Chr3	RLK_WE	1	None	DLSV	1.6e-111
ZSDa006	ZSDa006_Chr17_gene_2463900_mRNA	Chr17	RLK	1	B_lectin#S_locus_glycop#PAN_2	SD-2b	5.3e-108
ZSDa006	ZSDa006_Chr13_gene_1818900_mRNA	Chr13	RLK	1	LRRNT_2#LRR_8#LRR_8#LRR_8#LRR_1#LRR_8#LRR_8#LRR_8	LRR-XI-1	4.1e-110
ZSDa006	ZSDa006_Chr5_gene_0737700_mRNA	Chr5	RLK	1	GUB_WAK_bind#WAK_assoc	LRK10L-2	5.6e-132
ZSDa006	ZSDa006_Chr2_gene_0126900_mRNA	Chr2	RLK	1	LysM#LysM	LysM	3e-97
ZSDa006	ZSDa006_Chr9_gene_1383100_mRNA	Chr9	RLK	1	LRRNT_2#LRR_4#LRR_4	LRR-II	3.3e-149
ZSDa006	ZSDa006_Chr17_gene_2500500_mRNA	Chr17	RLK_WE	1	None	LRR-XIIIa	5.6e-128
ZSDa006	ZSDa006_Chr4_gene_0410700_mRNA	Chr4	RLK	1	LRR_1#LRR_8	LRR-Xa	3.1e-134
ZSDa006	ZSDa006_Chr4_gene_0562700_mRNA	Chr4	RLK	1	EGF#EGF_CA	WAK	1e-106
ZSDa006	ZSDa006_Chr9_gene_1411800_mRNA	Chr9	RLK	1	LRRNT_2#LRR_8	LRR-VI-2	1.2e-116
ZSDa006	ZSDa006_Chr8_gene_1252700_mRNA	Chr8	RLK_WE	1	None	RLCK-Os	3e-65
ZSDa006	ZSDa006_Chr14_gene_1995100_mRNA	Chr14	RLK	1	B_lectin#PAN_2	SD-2b	2.9e-106
ZSDa006	ZSDa006_Chr2_gene_0242000_mRNA	Chr2	RLK	1	LRRNT_2#LRR_8#LRR_8#LRR_8#LRR_4#LRR_4#LRR_8#LRR_8#LRR_8#LRR_1#LRR_8	LRR-XI-1	1.1e-89
ZSDa006	ZSDa006_Chr2_gene_0244300_mRNA	Chr2	RLK	1	LRR_8#LRR_8#LRR_4#LRR_8#LRR_1#LRR_1#LRR_8#LRR_8#LRR_8	LRR-XI-1	5.8e-89
ZSDa006	ZSDa006_Chr2_gene_0241100_mRNA	Chr2	RLK	1	LRRNT_2#LRR_8#LRR_4#LRR_8#LRR_1#LRR_8#LRR_8#LRR_1#LRR_8	LRR-XI-1	1.3e-87
ZSDa006	ZSDa006_Chr19_gene_2896000_mRNA	Chr19	RLK_WE	1	None	RLCK-IXa	6.7e-112
ZSDa006	ZSDa006_Chr1_gene_0013200_mRNA	Chr1	RLK_WE	1	None	Extensin	1.2e-148
ZSDa006	ZSDa006_Chr15_gene_2147000_mRNA	Chr15	RLK	1	B_lectin#S_locus_glycop#PAN_2	DLSV	2.3e-123
ZSDa006	ZSDa006_Chr8_gene_1252000_mRNA	Chr8	RLK_WE	1	None	RLCK-Os	1.6e-150
ZSDa006	ZSDa006_Chr19_gene_2736000_mRNA	Chr19	RLK	1	LRRNT_2#LRR_1#LRR_8	LRR-II	9.6e-155
ZSDa006	ZSDa006_Chr13_gene_1812500_mRNA	Chr13	RLK	1	Lectin_legB	L-LEC	1.9e-82
ZSDa006	ZSDa006_Chr5_gene_0798600_mRNA	Chr5	RLK	1	LRRNT_2#LRR_4#LRR_8#LRR_4#LRR_4#LRR_8#LRR_8#LRR_8#LRR_1	LRR-III	5.2e-76
ZSDa006	ZSDa006_Chr1_gene_0013100_mRNA	Chr1	RLK	1	GUB_WAK_bind	LRK10L-2	4.5e-131
ZSDa006	ZSDa006_Chr15_gene_2272900_mRNA	Chr15	RLK	1	B_lectin#S_locus_glycop#PAN_2	DLSV	5e-110
ZSDa006	ZSDa006_Chr2_gene_0242700_mRNA	Chr2	RLK	1	LRR_8#LRR_8#LRR_1#LRR_8#LRR_4#LRR_4#LRR_1#LRR_4#LRR_8#LRR_1#LRR_8#LRR_8#LRR_8	LRR-XI-1	5.8e-89
ZSDa006	ZSDa006_Chr15_gene_2247300_mRNA	Chr15	RLK_WE	1	None	DLSV	1.6e-101
ZSDa006	ZSDa006_Chr12_gene_1790800_mRNA	Chr12	RLK	1	Malectin_like	CrRLK1L-1	2e-151
ZSDa006	ZSDa006_Chr13_gene_1816200_mRNA	Chr13	RLK	1	Lectin_legB	L-LEC	1.5e-110
ZSDa006	ZSDa006_Chr18_gene_2649500_mRNA	Chr18	RLK	1	LRRNT_2#LRR_8#LRR_8#LRR_8#LRR_1#LRR_8#LRR_8#Island#LRR_1#LRR_8	LRR-Xb-1	1e-125
ZSDa006	ZSDa006_Chr13_gene_1817300_mRNA	Chr13	RLK	1	Lectin_legB	L-LEC	5.6e-116
ZSDa006	ZSDa006_Chr8_gene_1312500_mRNA	Chr8	RLK	1	Stress-antifung#Stress-antifung	DLSV	1.2e-121
ZSDa006	ZSDa006_Chr17_gene_2480500_mRNA	Chr17	RLK	1	LRRNT_2#LRR_8#LRR_1#LRR_4#LRR_4#LRR_4#LRR_8#LRR_8#LRR_8#LRR_4#LRR_8	LRR-XII-1	1.9e-120
ZSDa006	ZSDa006_Chr4_gene_0418200_mRNA	Chr4	RLK	1	LRRNT_2#LRR_8#LRR_8#LRR_8#LRR_8#LRR_1#LRR_4#LRR_8	LRR-XI-1	2.8e-101
ZSDa006	ZSDa006_Chr20_gene_2940200_mRNA	Chr20	RLK_WE	1	None	RLCK-IXa	2e-49
ZSDa006	ZSDa006_Chr9_gene_1401500_mRNA	Chr9	RLK	1	LRRNT_2#LRR_8#LRR_8#LRR_8#LRR_8	LRR-VIII-1	2e-132
ZSDa006	ZSDa006_Chr14_gene_1995200_mRNA	Chr14	RLK	1	B_lectin#PAN_2	SD-2b	6.1e-108
ZSDa006	ZSDa006_Chr19_gene_2797500_mRNA	Chr19	RLK	1	Malectin_like	CrRLK1L-1	1.4e-125
ZSDa006	ZSDa006_Chr4_gene_0433100_mRNA	Chr4	RLK	1	WAK_assoc	LRK10L-2	7.2e-134
ZSDa006	ZSDa006_Chr19_gene_2860600_mRNA	Chr19	RLK	1	LRRNT_2#LRR_1#LRR_8#LRR_1#LRR_8#LRR_8#LRR_8#LRR_4#LRR_8#LRR_8#LRR_8#LRR_8	LRR-XII-1	1.7e-78
ZSDa006	ZSDa006_Chr18_gene_2616200_mRNA	Chr18	RLK	1	LRRNT_2#LRR_8#LRR_4	LRR-III	3.3e-114
ZSDa006	ZSDa006_Chr15_gene_2213600_mRNA	Chr15	RLK	1	B_lectin#S_locus_glycop#PAN_2	SD-2b	1.3e-116
ZSDa006	ZSDa006_Chr4_gene_0524500_mRNA	Chr4	RLK_WE	1	None	SD-2b	1.4e-104
ZSDa006	ZSDa006_Chr8_gene_1282200_mRNA	Chr8	RLK	1	LRR_8#LRR_8#LRR_8	LRR-VI-1	2.8e-106
ZSDa006	ZSDa006_Chr20_gene_2962800_mRNA	Chr20	RLK	1	LRR_4#LRR_8#LRR_4#Malectin	DLSV	7.6e-106
ZSDa006	ZSDa006_Chr9_gene_1403000_mRNA	Chr9	RLK	1	LRRNT_2#LRR_8#LRR_8#LRR_1	LRR-III	2.8e-111
ZSDa006	ZSDa006_Chr14_gene_2114100_mRNA	Chr14	RLK	1	LRRNT_2#LRR_8#LRR_8#LRR_8#LRR_8#LRR_1	LRR-VII-1	1e-124
ZSDa006	ZSDa006_Chr13_gene_1812600_mRNA	Chr13	RLK	1	Lectin_legB	L-LEC	1.2e-119
ZSDa006	ZSDa006_Chr8_gene_1252400_mRNA	Chr8	RLK_WE	1	None	RLCK-Os	3.6e-124
ZSDa006	ZSDa006_Chr3_gene_0358600_mRNA	Chr3	RLK	1	LRRNT_2#LRR_8#LRR_8#LRR_4#LRR_8#LRR_8#LRR_8#LRR_8#LRR_8	LRR-XI-1	2.4e-98
ZSDa006	ZSDa006_Chr19_gene_2760100_mRNA	Chr19	RLK	1	B_lectin#S_locus_glycop#PAN_2	DLSV	2.4e-121
ZSDa006	ZSDa006_Chr15_gene_2146200_mRNA	Chr15	RLK	1	B_lectin#S_locus_glycop#PAN_2	DLSV	4.3e-122
ZSDa006	ZSDa006_Chr14_gene_2093400_mRNA	Chr14	RLK_WE	1	None	RLCK-XIII	2.9e-115
ZSDa006	ZSDa006_Chr4_gene_0396900_mRNA	Chr4	RLK	1	LRR_8#LRR_8#LRR_8	LRR-IX	4.1e-77
ZSDa006	ZSDa006_Chr19_gene_2911900_mRNA	Chr19	RLK_WE	1	None	RLCK-V	1.3e-154
ZSDa006	ZSDa006_Chr5_gene_0610100_mRNA	Chr5	RLK	1	LRR_1#LRR_8#LRR_8#LRR_1#LRR_1#LRR_8#LRR_4#LRR_8#LRR_8	LRR-XI-1	2e-71
ZSDa006	ZSDa006_Chr8_gene_1188400_mRNA	Chr8	RLK	1	Malectin_like	CrRLK1L-1	1.6e-148
ZSDa006	ZSDa006_Chr5_gene_0658700_mRNA	Chr5	RLK	1	Malectin_like#LRR_4#LRR_4	LRR-I-1	5.6e-110
ZSDa006	ZSDa006_Chr1_gene_0030700_mRNA	Chr1	RLK	1	LRR_1#LRR_8#LRR_8	LRR-XI-1	1.1e-42
ZSDa006	ZSDa006_Chr19_gene_2842100_mRNA	Chr19	RLK	1	LRRNT_2#LRR_8#LRR_4#LRR_1	LRR-III	2e-115
ZSDa006	ZSDa006_Chr15_gene_2148700_mRNA	Chr15	RLK	1	B_lectin#S_locus_glycop#PAN_2	DLSV	1.9e-117
ZSDa006	ZSDa006_Chr15_gene_2274000_mRNA	Chr15	RLK	1	B_lectin#S_locus_glycop#PAN_2	DLSV	2.6e-122
ZSDa006	ZSDa006_Chr2_gene_0242400_mRNA	Chr2	RLK	1	LRRNT_2#LRR_8#LRR_1#LRR_8#LRR_1#LRR_4#LRR_8#LRR_4#LRR_8#LRR_4#LRR_1#LRR_8	LRR-XI-1	8.7e-66
ZSDa006	ZSDa006_Chr9_gene_1398300_mRNA	Chr9	RLK	1	LRRNT_2#LRR_4#LRR_8#LRR_4	LRR-VIII-1	2.5e-128
ZSDa006	ZSDa006_Chr17_gene_2480600_mRNA	Chr17	RLK	1	LRRNT_2#LRR_4#LRR_4#LRR_1#LRR_8#LRR_8#LRR_8#LRR_8	LRR-XII-1	1.6e-109
ZSDa006	ZSDa006_Chr18_gene_2656900_mRNA	Chr18	RLK	1	LRRNT_2#LRR_8	LRR-II	1.1e-148
ZSDa006	ZSDa006_Chr20_gene_2970100_mRNA	Chr20	RLK	1	LRRNT_2#LRR_8#LRR_8#LRR_8#LRR_8#LRR_8#LRR_8#LRR_8	LRR-XI-1	1.7e-101
ZSDa006	ZSDa006_Chr2_gene_0146600_mRNA	Chr2	RLK	1	LRRNT_2#LRR_8#LRR_4	LRR-III	2e-82
ZSDa006	ZSDa006_Chr4_gene_0424400_mRNA	Chr4	RLK	1	SPARK	RKF3	1.5e-103
ZSDa006	ZSDa006_Chr14_gene_2073200_mRNA	Chr14	RLK_WE	1	None	RLCK-IXa	1.3e-117
ZSDa006	ZSDa006_Chr19_gene_2771500_mRNA	Chr19	RLK	1	LRRNT_2#LRR_8#LRR_8#LRR_1#LRR_1#LRR_4#LRR_8#LRR_8#LRR_8	LRR-XII-1	1.8e-80
ZSDa006	ZSDa006_Chr13_gene_1811900_mRNA	Chr13	RLK_WE	1	None	LysM	1.6e-66
ZSDa006	ZSDa006_Chr8_gene_1243500_mRNA	Chr8	RLK	1	LRR_4#LRR_8#LRR_1	LRR-III	3.4e-92
ZSDa006	ZSDa006_Chr13_gene_1817000_mRNA	Chr13	RLK	1	Lectin_legB	L-LEC	1.8e-114
ZSDa006	ZSDa006_Chr2_gene_0245600_mRNA	Chr2	RLK	1	LRRNT_2#LRR_8#LRR_1#LRR_8#LRR_8#LRR_8#LRR_4#LRR_8	LRR-XI-1	9e-91
ZSDa006	ZSDa006_Chr5_gene_0843800_mRNA	Chr5	RLK	1	B_lectin	SD-2b	1.6e-104
ZSDa006	ZSDa006_Chr4_gene_0522900_mRNA	Chr4	RLK	1	LRRNT_2#LRR_8#LRR_4	LRR-III	7.8e-107
ZSDa006	ZSDa006_Chr12_gene_1775000_mRNA	Chr12	RLK	1	Malectin_like	CrRLK1L-1	7.1e-127
ZSDa006	ZSDa006_Chr5_gene_0847300_mRNA	Chr5	RLK	1	GUB_WAK_bind#WAK#EGF_CA	WAK	3.9e-111
ZSDa006	ZSDa006_Chr18_gene_2666200_mRNA	Chr18	RLK	1	Malectin_like#LRRNT_2#LRR_4#LRR_8	LRR-I-1	3e-113
ZSDa006	ZSDa006_Chr19_gene_2798300_mRNA	Chr19	RLK	1	Malectin_like	CrRLK1L-1	2.4e-136
ZSDa006	ZSDa006_Chr4_gene_0562500_mRNA	Chr4	RLK	1	EGF_CA	WAK	5.9e-107
ZSDa006	ZSDa006_Chr2_gene_0127800_mRNA	Chr2	RLK	1	GUB_WAK_bind#EGF_3	WAK_LRK10L-1	3.1e-125
ZSDa006	ZSDa006_Chr14_gene_2101600_mRNA	Chr14	RLK_WE	1	None	RLCK-V	2.3e-157
ZSDa006	ZSDa006_Chr8_gene_1252500_mRNA	Chr8	RLK_WE	1	None	RLCK-Os	5.7e-133
ZSDa006	ZSDa006_Chr15_gene_2148900_mRNA	Chr15	RLK	1	B_lectin#S_locus_glycop#PAN_2	DLSV	3.8e-122
ZSDa006	ZSDa006_Chr13_gene_1859300_mRNA	Chr13	RLK	1	LRR_8#Malectin	DLSV	1e-108
ZSDa006	ZSDa006_Chr3_gene_0285300_mRNA	Chr3	RLK	1	LRRNT_2#LRR_8#LRR_8#LRR_1#LRR_8#LRR_1#LRR_1#LRR_8#LRR_8	LRR-XII-1	1.7e-105
ZSDa006	ZSDa006_Chr19_gene_2797700_mRNA	Chr19	RLK	1	Malectin_like	CrRLK1L-1	5e-125
ZSDa006	ZSDa006_Chr17_gene_2505800_mRNA	Chr17	RLK_WE	1	None	WAK_LRK10L-1	8.5e-126
ZSDa006	ZSDa006_Chr15_gene_2275000_mRNA	Chr15	RLK	1	B_lectin#S_locus_glycop#PAN_2	SD-2b	1.4e-123
ZSDa006	ZSDa006_Chr11_gene_1629900_mRNA	Chr11	RLK	1	LRRNT_2#LRR_8#LRR_8#LRR_1#LRR_8#LRR_8#LRR_8#LRR_8	LRR-XI-1	1.1e-111
ZSDa006	ZSDa006_Chr13_gene_1818500_mRNA	Chr13	RLK	1	Lectin_legB	L-LEC	8.7e-117
ZSDa006	ZSDa006_Chr7_gene_1033500_mRNA	Chr7	RLK	1	Lectin_legB	L-LEC	1.7e-109
ZSDa006	ZSDa006_Chr15_gene_2273400_mRNA	Chr15	RLK	1	B_lectin#S_locus_glycop#PAN_2	DLSV	4e-128
ZSDa006	ZSDa006_Chr20_gene_2921300_mRNA	Chr20	RLK	1	LRRNT_2#LRR_8#LRR_8	LRR-III	2.2e-93
ZSDa006	ZSDa006_Chr15_gene_2148600_mRNA	Chr15	RLK	1	B_lectin#S_locus_glycop#PAN_2	DLSV	3.8e-120
ZSDa006	ZSDa006_Chr3_gene_0262300_mRNA	Chr3	RLK	1	LRRNT_2#LRR_8#LRR_1	LRR-III	2.7e-98
ZSDa006	ZSDa006_Chr2_gene_0249600_mRNA	Chr2	RLK	1	LRRNT_2#LRR_8#LRR_8#LRR_8#LRR_4#LRR_4#LRR_4#LRR_4#LRR_8#LRR_8#LRR_1#LRR_1	LRR-XI-1	5.6e-91
ZSDa006	ZSDa006_Chr19_gene_2750600_mRNA	Chr19	RLK	1	LRRNT_2#LRR_8#LRR_1#LRR_4	LRR-III	2.4e-105
ZSDa006	ZSDa006_Chr4_gene_0424500_mRNA	Chr4	RLK_WE	1	None	RKF3	7.7e-103
ZSDa006	ZSDa006_Chr13_gene_1812700_mRNA	Chr13	RLK	1	Lectin_legB	L-LEC	1.3e-116
ZSDa006	ZSDa006_Chr7_gene_1135000_mRNA	Chr7	RLK	1	B_lectin#S_locus_glycop#PAN_2	SD-2b	4.5e-102
ZSDa006	ZSDa006_Chr8_gene_1172100_mRNA	Chr8	RLK	1	Malectin_like	CrRLK1L-1	3.6e-148
ZSDa006	ZSDa006_Chr19_gene_2883800_mRNA	Chr19	RLK	1	LRRNT_2#LRR_1#LRR_8	LRR-V	6.2e-126
ZSDa006	ZSDa006_Chr9_gene_1401700_mRNA	Chr9	RLK	1	LRRNT_2#LRR_8#LRR_8#LRR_8#LRR_8	LRR-VIII-1	7.7e-132
ZSDa006	ZSDa006_Chr7_gene_1111000_mRNA	Chr7	RLK	1	LRRNT_2#LRR_8	LRR-VI-2	1.2e-109
ZSDa006	ZSDa006_Chr11_gene_1647500_mRNA	Chr11	RLK	1	LRRNT_2#LRR_4	LRR-III	1.4e-85
ZSDa006	ZSDa006_Chr5_gene_0768200_mRNA	Chr5	RLK	1	LRRNT_2#LRR_8#LRR_8#LRR_8#LRR_4#LRR_8#LRR_8#LRR_8#LRR_8#LRR_8#LRR_8	LRR-Xb-1	9.2e-125
ZSDa006	ZSDa006_Chr4_gene_0476500_mRNA	Chr4	RLK_WE	1	None	PERK-1	1.2e-148
ZSDa006	ZSDa006_Chr8_gene_1312000_mRNA	Chr8	RLK	1	Stress-antifung#Stress-antifung	DLSV	5.7e-124
ZSDa006	ZSDa006_Chr7_gene_1128300_mRNA	Chr7	RLK	1	GUB_WAK_bind#WAK#EGF_3	WAK	5e-103
ZSDa006	ZSDa006_Chr15_gene_2150200_mRNA	Chr15	RLK	1	S_locus_glycop#PAN_2	DLSV	3.8e-109
ZSDa006	ZSDa006_Chr7_gene_1127800_mRNA	Chr7	RLK	1	GUB_WAK_bind#WAK#EGF_3#EGF_CA	WAK	4.6e-106
ZSDa006	ZSDa006_Chr8_gene_1233100_mRNA	Chr8	RLK	1	LRRNT_2#LRR_8#LRR_1	LRR-III	1.5e-81
ZSDa006	ZSDa006_Chr13_gene_1816700_mRNA	Chr13	RLK	1	Lectin_legB	L-LEC	5.8e-117
ZSDa006	ZSDa006_Chr15_gene_2145400_mRNA	Chr15	RLK	1	B_lectin#S_locus_glycop#PAN_2	DLSV	3.3e-121
ZSDa006	ZSDa006_Chr11_gene_1692200_mRNA	Chr11	RLK_WE	1	None	RLCK-XVI	2.8e-145
ZSDa006	ZSDa006_Chr5_gene_0651700_mRNA	Chr5	RLK	1	S_locus_glycop#PAN_2	SD-2b	1.3e-121
ZSDa006	ZSDa006_Chr20_gene_2969300_mRNA	Chr20	RLK	1	LRRNT_2#LRR_1#LRR_8#LRR_8#LRR_8#LRR_1#LRR_8#LRR_4	LRR-XII-1	1.3e-120
ZSDa006	ZSDa006_Chr13_gene_1825200_mRNA	Chr13	RLK_WE	1	None	PERK-1	2.4e-156
ZSDa006	ZSDa006_Chr20_gene_2943200_mRNA	Chr20	RLK	1	B_lectin#S_locus_glycop#PAN_2	DLSV	2.9e-108
ZSDa006	ZSDa006_Chr17_gene_2409000_mRNA	Chr17	RLK	1	LRRNT_2#LRR_8#LRR_8#LRR_8#LRR_4#LRR_8#LRR_1#LRR_8#LRR_8	LRR-XII-1	2e-120
ZSDa006	ZSDa006_Chr7_gene_1128500_mRNA	Chr7	RLK	1	GUB_WAK_bind#WAK#EGF_3#EGF_CA	WAK	1.1e-108
ZSDa006	ZSDa006_Chr13_gene_1818200_mRNA	Chr13	RLK	1	Lectin_legB	L-LEC	1.7e-116
ZSDa006	ZSDa006_Chr17_gene_2517000_mRNA	Chr17	RLK	1	GUB_WAK_bind	LRK10L-2	8.1e-135
ZSDa006	ZSDa006_Chr5_gene_0642700_mRNA	Chr5	RLK	1	RCC1_2#RCC1_2#RCC1_2#RCC1_2#RCC1_2#TNFR_c6	CR4L	3e-108
ZSDa006	ZSDa006_Chr8_gene_1228200_mRNA	Chr8	RLK_WE	1	None	LRR-III	1.6e-72
ZSDa006	ZSDa006_Chr9_gene_1341600_mRNA	Chr9	RLK_WE	1	None	RLCK-X	1.6e-148
ZSDa006	ZSDa006_Chr15_gene_2268000_mRNA	Chr15	RLK	1	Stress-antifung#Stress-antifung	DLSV	8.3e-121
ZSDa006	ZSDa006_Chr19_gene_2869900_mRNA	Chr19	RLK	1	LRR_8#LRR_4#LRR_8#LRR_1#Malectin	DLSV	5.6e-113
ZSDa006	ZSDa006_Chr12_gene_1779300_mRNA	Chr12	RLK	1	LRR_4#LRR_1#LRR_8#LRR_8#LRR_8#LRR_8#LRR_8	LRR-XI-1	1.3e-85
ZSDa006	ZSDa006_Chr13_gene_1818100_mRNA	Chr13	RLK	1	Lectin_legB	L-LEC	3.7e-117
ZSDa006	ZSDa006_Chr8_gene_1252300_mRNA	Chr8	RLK_WE	1	None	RLCK-Os	7.6e-151
ZSDa006	ZSDa006_Chr7_gene_1018900_mRNA	Chr7	RLK	1	Stress-antifung	DLSV	4.8e-121
ZSDa006	ZSDa006_Chr9_gene_1425100_mRNA	Chr9	RLK	1	Lectin_legB	L-LEC	1.5e-121
ZSDa006	ZSDa006_Chr18_gene_2632100_mRNA	Chr18	RLK	1	LRRNT_2#LRR_1#LRR_1#LRR_4	LRR-II	1.3e-148
ZSDa006	ZSDa006_Chr15_gene_2221500_mRNA	Chr15	RLK	1	LRR_8#LRR_8#LRR_8	LRR-VI-1	4.9e-115
ZSDa006	ZSDa006_Chr14_gene_2096800_mRNA	Chr14	RLK	1	LRRNT_2#LRR_8#LRR_1#LRR_8#LRR_8#LRR_8#LRR_8	LRR-Xb-1	2e-125
ZSDa006	ZSDa006_Chr19_gene_2869600_mRNA	Chr19	RLK	1	LRR_8#LRR_4#LRR_8#Malectin	DLSV	1.6e-110
ZSDa006	ZSDa006_Chr20_gene_2991700_mRNA	Chr20	RLK	1	B_lectin#S_locus_glycop	SD-2b	7.2e-117
ZSDa006	ZSDa006_Chr4_gene_0501500_mRNA	Chr4	RLK	1	Malectin	DLSV	7.2e-108
ZSDa006	ZSDa006_Chr1_gene_0031100_mRNA	Chr1	RLK_WE	1	None	LRR-XI-1	1.2e-66
ZSDa006	ZSDa006_Chr20_gene_2954300_mRNA	Chr20	RLK	1	LRR_8#LRR_8#LRR_8#Malectin	DLSV	1.2e-106
ZSDa006	ZSDa006_Chr15_gene_2135500_mRNA	Chr15	RLK	1	LRRNT_2#LRR_8#LRR_8#LRR_8#LRR_1#LRR_8#LRR_1#LRR_1#LRR_8	LRR-XV	2.5e-125
ZSDa006	ZSDa006_Chr15_gene_2269100_mRNA	Chr15	RLK	1	Stress-antifung	DLSV	1.7e-107
ZSDa006	ZSDa006_Chr20_gene_2985000_mRNA	Chr20	RLK	1	LRR_8#LRR_8#LRR_4#Malectin	DLSV	1.1e-111
ZSDa006	ZSDa006_Chr17_gene_2527600_mRNA	Chr17	RLK_WE	1	None	PERK-1	7.8e-152
ZSDa006	ZSDa006_Chr15_gene_2146500_mRNA	Chr15	RLK	1	B_lectin#S_locus_glycop#PAN_2	DLSV	8.3e-122
ZSDa006	ZSDa006_Chr5_gene_0646100_mRNA	Chr5	RLK	1	LRRNT_2#LRR_4#LRR_8#LRR_1#LRR_4	LRR-VIII-1	2e-129
ZSDa006	ZSDa006_Chr2_gene_0245100_mRNA	Chr2	RLK	1	LRRNT_2#LRR_8#LRR_4#LRR_8#LRR_4#LRR_8#LRR_1#LRR_8	LRR-XI-1	2.5e-90
ZSDa006	ZSDa006_Chr8_gene_1316600_mRNA	Chr8	RLK	1	B_lectin#S_locus_glycop#PAN_2	DLSV	2e-126
ZSDa006	ZSDa006_Chr15_gene_2146800_mRNA	Chr15	RLK	1	B_lectin#S_locus_glycop#PAN_2	DLSV	6.1e-122
ZSDa006	ZSDa006_Chr5_gene_0794000_mRNA	Chr5	RLK	1	LRR_8	LRR-III	2.1e-102
ZSDa006	ZSDa006_Chr14_gene_2052200_mRNA	Chr14	RLK	1	LRRNT_2#LRR_8#LRR_8#LRR_8#LRR_8#LRR_8#LRR_1#LRR_8#LRR_8#LRR_8#LRR_8	LRR-XI-1	1.3e-91
ZSDa006	ZSDa006_Chr17_gene_2437600_mRNA	Chr17	RLK	1	LRRNT_2#LRR_8#LRR_8#LRR_8#LRR_4#LRR_8	LRR-XI-1	4.1e-107
ZSDa006	ZSDa006_Chr5_gene_0830600_mRNA	Chr5	RLK	1	B_lectin#S_locus_glycop#PAN_2	DLSV	2.6e-128
ZSDa006	ZSDa006_Chr5_gene_0844700_mRNA	Chr5	RLK	1	B_lectin#PAN_2	SD-2b	1.9e-106
ZSDa006	ZSDa006_Chr13_gene_1816900_mRNA	Chr13	RLK	1	Lectin_legB	L-LEC	3.8e-119
ZSDa006	ZSDa006_Chr15_gene_2274400_mRNA	Chr15	RLK	1	B_lectin#S_locus_glycop#PAN_2	SD-2b	3.9e-116
ZSDa006	ZSDa006_Chr15_gene_2164500_mRNA	Chr15	RLK_WE	1	None	PERK-1	2.6e-151
ZSDa006	ZSDa006_Chr17_gene_2425300_mRNA	Chr17	RLK	1	LRRNT_2#LRR_8#LRR_4#LRR_8#LRR_8#LRR_8#LRR_8#LRR_8#LRR_8#LRR_1#LRR_8	LRR-XII-1	5.5e-119
ZSDa006	ZSDa006_Chr16_gene_2299300_mRNA	Chr16	RLK_WE	1	None	LRR-III	1.9e-77
ZSDa006	ZSDa006_Chr12_gene_1771100_mRNA	Chr12	RLK	1	LRRNT_2#LRR_8#LRR_8#LRR_1#LRR_8	LRR-VIII-1	2.6e-131
ZSDa006	ZSDa006_Chr4_gene_0436600_mRNA	Chr4	RLK	1	GUB_WAK_bind#WAK_assoc	LRK10L-2	9.8e-130
ZSDa006	ZSDa006_Chr11_gene_1669400_mRNA	Chr11	RLK	1	LRRNT_2#LRR_8	LRR-VI-2	4.1e-101
ZSDa006	ZSDa006_Chr7_gene_1128400_mRNA	Chr7	RLK	1	GUB_WAK_bind#WAK#EGF#EGF_CA	WAK	4.8e-100
ZSDa006	ZSDa006_Chr17_gene_2504200_mRNA	Chr17	RLK	1	LRRNT_2#LRR_1#LRR_8#LRR_1	LRR-III	2e-95
ZSDa006	ZSDa006_Chr8_gene_1160000_mRNA	Chr8	RLK	1	Lectin_legB	L-LEC	3.2e-117
ZSDa006	ZSDa006_Chr18_gene_2675900_mRNA	Chr18	RLK	1	Lectin_legB	L-LEC	3.1e-117
ZSDa006	ZSDa006_Chr6_gene_0852100_mRNA	Chr6	RLK_WE	1	None	RLCK-V	5.9e-156
ZSDa006	ZSDa006_Chr5_gene_0844000_mRNA	Chr5	RLK	1	B_lectin#PAN_2	SD-2b	1.2e-108
ZSDa006	ZSDa006_Chr2_gene_0240500_mRNA	Chr2	RLK	1	LRRNT_2#LRR_8#LRR_4#LRR_8#LRR_8#LRR_8#LRR_8#LRR_8#LRR_8	LRR-XI-1	2.2e-91
ZSDa006	ZSDa006_Chr3_gene_0375300_mRNA	Chr3	RLK	1	LRRNT_2#LRR_4#LRR_1#LRR_1#LRR_8#LRR_4#LRR_8#LRR_1#LRR_8	LRR-XI-1	7.6e-87
ZSDa006	ZSDa006_Chr12_gene_1696900_mRNA	Chr12	RLK_WE	1	None	RLCK-V	1.9e-157
ZSDa006	ZSDa006_Chr8_gene_1158600_mRNA	Chr8	RLK	1	Lectin_legB	L-LEC	2e-118
ZSDa006	ZSDa006_Chr8_gene_1232000_mRNA	Chr8	RLK	1	LRR_8	LRR-III	5.4e-58
ZSDa006	ZSDa006_Chr8_gene_1318100_mRNA	Chr8	RLK	1	B_lectin#S_locus_glycop#PAN_2	SD-2b	5.6e-125
ZSDa006	ZSDa006_Chr13_gene_1817400_mRNA	Chr13	RLK	1	Lectin_legB	L-LEC	1.8e-114
ZSDa006	ZSDa006_Chr19_gene_2870000_mRNA	Chr19	RLK	1	LRR_8#LRR_4#LRR_8#Malectin	DLSV	2.1e-76
ZSDa006	ZSDa006_Chr10_gene_1534800_mRNA	Chr10	RLK	1	LRR_8#LRR_1	LRR-Xa	4.6e-96
ZSDa006	ZSDa006_Chr8_gene_1190300_mRNA	Chr8	RLK	1	Lectin_legB	L-LEC	3.4e-105
ZSDa006	ZSDa006_Chr17_gene_2437900_mRNA	Chr17	RLK	1	LRRNT_2#LRR_8#LRR_8#LRR_8#LRR_8#LRR_4#LRR_8	LRR-XI-1	2.1e-106
ZSDa006	ZSDa006_Chr13_gene_1816600_mRNA	Chr13	RLK	1	Lectin_legB	L-LEC	1e-112
ZSDa006	ZSDa006_Chr8_gene_1260300_mRNA	Chr8	RLK	1	LRRNT_2#LRR_1#LRR_8	LRR-II	3e-134
ZSDa006	ZSDa006_Chr3_gene_0285400_mRNA	Chr3	RLK	1	LRRNT_2#LRR_8#LRR_4#LRR_8#LRR_1#LRR_4#LRR_1#LRR_1#LRR_1#LRR_8	LRR-XII-1	1.9e-105
ZSDa006	ZSDa006_Chr8_gene_1161300_mRNA	Chr8	RLK_WE	1	None	PERK-1	4.5e-154
ZSDa006	ZSDa006_Chr2_gene_0245400_mRNA	Chr2	RLK	1	LRRNT_2#LRR_8#LRR_4#LRR_4#LRR_4#LRR_8#LRR_8#LRR_8#LRR_8#LRR_8	LRR-XI-1	2.4e-80
ZSDa006	ZSDa006_Chr1_gene_0116000_mRNA	Chr1	RLK	1	LRRNT_2#LRR_8#LRR_8#LRR_8#LRR_8#LRR_8#LRR_8#LRR_8	LRR-XI-1	4.7e-106
ZSDa006	ZSDa006_Chr16_gene_2349400_mRNA	Chr16	RLK	1	LRRNT_2#LRR_8#LRR_8#LRR_8#LRR_8#LRR_8#LRR_1#LRR_8	LRR-XII-1	5.9e-102
ZSDa006	ZSDa006_Chr5_gene_0729500_mRNA	Chr5	RLK_WE	1	None	PERK-1	8.4e-119
ZSDa006	ZSDa006_Chr3_gene_0318400_mRNA	Chr3	RLK_WE	1	None	RLCK-IXa	7e-54
ZSDa006	ZSDa006_Chr5_gene_0840200_mRNA	Chr5	RLK	1	LRRNT_2#LRR_8#LRR_4#LRR_1#LRR_4#LRR_8#LRR_8#LRR_8#LRR_1#Island#LRR_8#LRR_4	LRR-Xb-1	1.3e-129
ZSDa006	ZSDa006_Chr7_gene_1128200_mRNA	Chr7	RLK	1	GUB_WAK_bind#WAK#EGF#EGF_CA	WAK	7.2e-101
ZSDa006	ZSDa006_Chr2_gene_0243900_mRNA	Chr2	RLK	1	LRR_8#LRR_4#LRR_8#LRR_8#LRR_8#LRR_1#LRR_4#LRR_1#LRR_4#LRR_1#LRR_8#LRR_8#LRR_8#LRR_8#LRR_4#LRR_8	LRR-XI-1	1.9e-87
ZSDa006	ZSDa006_Chr13_gene_1816300_mRNA	Chr13	RLK	1	Lectin_legB	L-LEC	2.8e-116
ZSDa006	ZSDa006_Chr13_gene_1817200_mRNA	Chr13	RLK	1	Lectin_legB	L-LEC	2.9e-113
ZSDa006	ZSDa006_Chr7_gene_1033600_mRNA	Chr7	RLK	1	B_lectin#S_locus_glycop#PAN_2	DLSV	1.6e-121
ZSDa006	ZSDa006_Chr20_gene_2984800_mRNA	Chr20	RLK	1	LRR_8#LRR_8#LRR_8#Malectin	DLSV	2.1e-106
ZSDa006	ZSDa006_Chr9_gene_1404700_mRNA	Chr9	RLK	1	LRRNT_2#LRR_8#LRR_4#LRR_8#LRR_1#LRR_8#LRR_8#LRR_1#LRR_8	LRR-VII-1	9.1e-130
ZSDa006	ZSDa006_Chr19_gene_2740200_mRNA	Chr19	RLK	1	LRRNT_2#LRR_8#LRR_1	LRR-III	2.7e-88
ZSDa006	ZSDa006_Chr2_gene_0249500_mRNA	Chr2	RLK	1	LRRNT_2#LRR_4#LRR_8#LRR_8#LRR_8#LRR_1#LRR_4#LRR_4#LRR_8#LRR_8	LRR-XI-1	2.3e-83
ZSDa006	ZSDa006_Chr7_gene_1128100_mRNA	Chr7	RLK	1	GUB_WAK_bind#EGF_3#EGF_CA	WAK	8.1e-103
ZSDa006	ZSDa006_Chr13_gene_1817100_mRNA	Chr13	RLK	1	Lectin_legB	L-LEC	2.3e-120
ZSDa006	ZSDa006_Chr19_gene_2846400_mRNA	Chr19	RLK	1	LRR_8#LRR_4#LRR_8	LRR-VIII-1	3.7e-133
ZSDa006	ZSDa006_Chr15_gene_2146000_mRNA	Chr15	RLK	1	B_lectin#S_locus_glycop#PAN_2	DLSV	9.6e-121
ZSDa006	ZSDa006_Chr5_gene_0690900_mRNA	Chr5	RLK	1	LRRNT_2#LRR_8#LRR_4#LRR_4#LRR_8#LRR_8#LRR_4#LRR_1#LRR_8#LRR_8#LRR_1	LRR-XI-1	3.8e-111
ZSDa006	ZSDa006_Chr8_gene_1262100_mRNA	Chr8	RLK	1	LRRNT_2#LRR_8#LRR_8#LRR_8#LRR_8#LRR_1#LRR_8#LRR_1	LRR-XII-1	4e-100
ZSDa006	ZSDa006_Chr17_gene_2437300_mRNA	Chr17	RLK	1	LRRNT_2#LRR_8#LRR_8#LRR_8#LRR_8#LRR_4#LRR_4#LRR_8	LRR-XI-1	1.4e-100
ZSDa006	ZSDa006_Chr2_gene_0244800_mRNA	Chr2	RLK	1	LRRNT_2#LRR_8#LRR_4#LRR_1#LRR_8#LRR_4#LRR_4#LRR_1#LRR_8#LRR_4#LRR_1#LRR_8	LRR-XI-1	1.6e-90
ZSDa006	ZSDa006_Chr8_gene_1231400_mRNA	Chr8	RLK	1	LRRNT_2#LRR_1#LRR_8	LRR-III	3.5e-81
ZSDa006	ZSDa006_Chr15_gene_2149700_mRNA	Chr15	RLK	1	B_lectin#S_locus_glycop#PAN_2	DLSV	1e-96
ZSDa006	ZSDa006_Chr15_gene_2158100_mRNA	Chr15	RLK	1	LRR_4#LRR_8#LRR_8#Malectin	DLSV	6.5e-106
ZSDa006	ZSDa006_Chr5_gene_0798700_mRNA	Chr5	RLK	1	LRRNT_2#LRR_1#LRR_8	LRR-II	6.6e-156
ZSDa006	ZSDa006_Chr20_gene_3030400_mRNA	Chr20	RLK	1	LRRNT_2#LRR_8#LRR_1#LRR_4	LRR-III	6e-106
ZSDa006	ZSDa006_Chr11_gene_1675400_mRNA	Chr11	RLK	1	Stress-antifung#Stress-antifung	DLSV	9.7e-124
ZSDa006	ZSDa006_Chr4_gene_0562600_mRNA	Chr4	RLK	1	EGF_3#EGF_CA	WAK	5e-106
ZSDa006	ZSDa006_Chr7_gene_1097900_mRNA	Chr7	RLK	1	LRRNT_2#LRR_8#LRR_1#LRR_4	LRR-III	1.9e-115
ZSDa006	ZSDa006_Chr15_gene_2274200_mRNA	Chr15	RLK	1	B_lectin#S_locus_glycop#PAN_2	DLSV	2.9e-121
ZSDa006	ZSDa006_Chr8_gene_1252600_mRNA	Chr8	RLK_WE	1	None	RLCK-Os	2.3e-131
ZSDa006	ZSDa006_Chr15_gene_2275100_mRNA	Chr15	RLK	1	B_lectin#S_locus_glycop#PAN_2	SD-2b	5.4e-120
ZSDa006	ZSDa006_Chr5_gene_0728700_mRNA	Chr5	RLK_WE	1	None	PERK-1	2.8e-156
ZSDa006	ZSDa006_Chr18_gene_2639700_mRNA	Chr18	RLK	1	LRRNT_2#LRR_6#LRR_8#LRR_1	LRR-V	1.2e-142
ZSDa006	ZSDa006_Chr4_gene_0493400_mRNA	Chr4	RLK	1	GUB_WAK_bind#WAK_assoc	WAK_LRK10L-1	4.2e-129
ZSDa006	ZSDa006_Chr12_gene_1779600_mRNA	Chr12	RLK	1	LRR_1#LRR_8#LRR_1#LRR_8#LRR_8#LRR_8	LRR-XI-1	4.3e-88
ZSDa006	ZSDa006_Chr12_gene_1773500_mRNA	Chr12	RLK	1	LRRNT_2#LRR_8#LRR_8#LRR_8#LRR_8#LRR_8#LRR_1#LRR_8	LRR-VII-1	5.9e-125
ZSDa006	ZSDa006_Chr5_gene_0737600_mRNA	Chr5	RLK	1	GUB_WAK_bind#WAK_assoc	LRK10L-2	7.8e-133
ZSDa006	ZSDa006_Chr10_gene_1503600_mRNA	Chr10	RLK	1	LRR_4#LRR_8	LRR-VII-1	7.5e-126
ZSDa006	ZSDa006_Chr7_gene_0979400_mRNA	Chr7	RLK_WE	1	None	RLCK-V	6.4e-158
ZSDa006	ZSDa006_Chr19_gene_2788100_mRNA	Chr19	RLK	1	LRRNT_2#LRR_8#LRR_4#LRR_8#LRR_8#LRR_8#LRR_8	LRR-Xb-1	4.3e-126
ZSDa006	ZSDa006_Chr15_gene_2273500_mRNA	Chr15	RLK	1	B_lectin#S_locus_glycop#PAN_2	DLSV	1.7e-123
ZSDa006	ZSDa006_Chr20_gene_2969900_mRNA	Chr20	RLK	1	LysM	LysM	8e-104
ZSDa006	ZSDa006_Chr15_gene_2243900_mRNA	Chr15	RLK	1	GUB_WAK_bind#WAK_assoc	WAK_LRK10L-1	1.5e-113
ZSDa006	ZSDa006_Chr2_gene_0249400_mRNA	Chr2	RLK	1	LRR_8#LRR_1#LRR_1#LRR_8#LRR_1#LRR_8#LRR_4	LRR-XI-1	2e-82
ZSDa006	ZSDa006_Chr15_gene_2273800_mRNA	Chr15	RLK	1	B_lectin#S_locus_glycop#PAN_2	DLSV	8.6e-128
ZSDa006	ZSDa006_Chr15_gene_2149600_mRNA	Chr15	RLK	1	B_lectin#S_locus_glycop#PAN_2	DLSV	7.6e-124
ZSDa006	ZSDa006_Chr5_gene_0614900_mRNA	Chr5	RLK	1	B_lectin#S_locus_glycop#PAN_1	SD-2b	4.7e-109
ZSDa006	ZSDa006_Chr17_gene_2408400_mRNA	Chr17	RLK	2	Kinase#LRRNT_2#LRR_4#LRR_4#LRR_8#LRR_4#LRR_8#LRR_8#LRR_8	LRR-XII-1	2e-233
ZSDa006	ZSDa006_Chr8_gene_1251900_mRNA	Chr8	RLK_WE	1	None	RLCK-Os	9.8e-131
ZSDa006	ZSDa006_Chr12_gene_1769400_mRNA	Chr12	RLK	1	LRR_4#LRR_8#LRR_1#LRR_8	LRR-VIII-1	2.9e-117
ZSDa006	ZSDa006_Chr8_gene_1190600_mRNA	Chr8	RLK_WE	1	None	WAK	2.9e-100
ZSDa006	ZSDa006_Chr15_gene_2248400_mRNA	Chr15	RLK	1	LRRNT_2#LRR_8#LRR_8#LRR_8#LRR_8#LRR_4#LRR_8#LRR_4#LRR_8#LRR_8#LRR_8#LRR_8	LRR-XI-1	2.5e-98
ZSDa006	ZSDa006_Chr14_gene_1961200_mRNA	Chr14	RLK	1	LRR_8#LRR_8#LRR_8#LRR_4#LRR_8#LRR_8#LRR_8#LRR_8	LRR-XI-1	1.9e-106
ZSDa006	ZSDa006_Chr8_gene_1159900_mRNA	Chr8	RLK	1	Lectin_legB	L-LEC	1.7e-112
ZSDa006	ZSDa006_Chr17_gene_2445100_mRNA	Chr17	RLK	1	B_lectin#S_locus_glycop#PAN_2	SD-2b	5e-115
ZSDa006	ZSDa006_Chr10_gene_1549900_mRNA	Chr10	RLK_WE	1	None	RLCK-V	1.4e-157
ZSDa006	ZSDa006_Chr8_gene_1250200_mRNA	Chr8	RLK_WE	1	None	DLSV	3.2e-108
ZSDa006	ZSDa006_Chr17_gene_2411800_mRNA	Chr17	RLK	2	Kinase#LRRNT_2#LRR_8#LRR_8#LRR_8#LRR_8#LRR_4#LRR_4#LRR_8	LRR-XII-1	9.6e-221
ZSDa006	ZSDa006_Chr8_gene_1317800_mRNA	Chr8	RLK	1	B_lectin#S_locus_glycop#PAN_2	SD-2b	1.3e-119
ZSDa006	ZSDa006_Chr19_gene_2885000_mRNA	Chr19	RLK_WE	1	None	Extensin	5.9e-132
ZSDa006	ZSDa006_Chr15_gene_2275200_mRNA	Chr15	RLK	1	B_lectin#S_locus_glycop#PAN_2	SD-2b	1.4e-119
ZSDa006	ZSDa006_Chr15_gene_2269400_mRNA	Chr15	RLK	1	Stress-antifung#Stress-antifung	DLSV	2.4e-120
ZSDa006	ZSDa006_Chr3_gene_0287400_mRNA	Chr3	RLK	1	LRRNT_2#LRR_8#LRR_8#LRR_8#LRR_1#LRR_8#LRR_8	LRR-VII-2	1.4e-133
ZSDa006	ZSDa006_Chr19_gene_2891700_mRNA	Chr19	RLK_WE	1	None	LRR-XI-1	1.9e-76
ZSDa006	ZSDa006_Chr17_gene_2411500_mRNA	Chr17	RLK	1	LRRNT_2#LRR_8#LRR_8#LRR_8#LRR_8#LRR_8#LRR_1#LRR_8#LRR_8	LRR-XII-1	1.3e-114
ZSDa006	ZSDa006_Chr5_gene_0843900_mRNA	Chr5	RLK	1	B_lectin#PAN_2	SD-2b	2.7e-108
ZSDa006	ZSDa006_Chr10_gene_1545200_mRNA	Chr10	RLK	1	B_lectin#S_locus_glycop#PAN_2	SD-2b	2.7e-120
ZSDa006	ZSDa006_Chr15_gene_2150400_mRNA	Chr15	RLK	1	B_lectin#S_locus_glycop#PAN_2	DLSV	1.8e-120
ZSDa006	ZSDa006_Chr20_gene_3008300_mRNA	Chr20	RLK_WE	1	None	Extensin	4.8e-137
ZSDa006	ZSDa006_Chr17_gene_2517800_mRNA	Chr17	RLK	1	GUB_WAK_bind#WAK_assoc	LRK10L-2	2.8e-122
ZSDa006	ZSDa006_Chr11_gene_1653500_mRNA	Chr11	RLK	1	LRRNT_2#LRR_8#LRR_8#LRR_8#LRR_8#LRR_8#LRR_1#LRR_8	LRR-Xb-1	2.8e-130
ZSDa006	ZSDa006_Chr15_gene_2268100_mRNA	Chr15	RLK	1	Stress-antifung#Stress-antifung	DLSV	1.4e-124
ZSDa006	ZSDa006_Chr18_gene_2659800_mRNA	Chr18	RLK	1	LRRNT_2#LRR_8	LRR-VI-2	2.2e-97
ZSDa006	ZSDa006_Chr15_gene_2127200_mRNA	Chr15	RLK	1	LRRNT_2#LRR_8	LRR-III	4.1e-76
ZSDa006	ZSDa006_Chr4_gene_0488800_mRNA	Chr4	RLK	1	Stress-antifung#Stress-antifung#Stress-antifung#Stress-antifung	DLSV	3.5e-122
ZSDa006	ZSDa006_Chr15_gene_2148300_mRNA	Chr15	RLK	1	B_lectin#S_locus_glycop#PAN_2	DLSV	5.2e-120
ZSDa006	ZSDa006_Chr8_gene_1234100_mRNA	Chr8	RLK	1	LRRNT_2#LRR_1#LRR_8	LRR-II	1.9e-146
ZSDa006	ZSDa006_Chr15_gene_2140700_mRNA	Chr15	RLK	1	Malectin_like	CrRLK1L-1	1.4e-150
ZSDa006	ZSDa006_Chr17_gene_2445500_mRNA	Chr17	RLK	1	B_lectin#S_locus_glycop#PAN_2	SD-2b	2.5e-113
ZSDa006	ZSDa006_Chr17_gene_2445800_mRNA	Chr17	RLK	1	B_lectin#S_locus_glycop#PAN_1	SD-2b	1.4e-98
ZSDa006	ZSDa006_Chr7_gene_1018800_mRNA	Chr7	RLK	1	Stress-antifung	DLSV	2.8e-108
ZSDa006	ZSDa006_Chr15_gene_2183400_mRNA	Chr15	RLK_WE	1	None	RLCK-IXa	5.6e-102
ZSDa006	ZSDa006_Chr15_gene_2273200_mRNA	Chr15	RLK	1	B_lectin#S_locus_glycop#PAN_2	DLSV	1.3e-126
ZSDa006	ZSDa006_Chr20_gene_2985100_mRNA	Chr20	RLK	1	LRR_8#LRR_4#LRR_1#Malectin	DLSV	8.2e-111
ZSDa006	ZSDa006_Chr4_gene_0472700_mRNA	Chr4	RLK	1	LRRNT_2#LRR_8#LRR_8#LRR_4#LRR_1#LRR_8#LRR_8#LRR_8#LRR_8#LRR_8	LRR-XI-1	2.6e-117
ZSDa006	ZSDa006_Chr15_gene_2269000_mRNA	Chr15	RLK	1	Stress-antifung	DLSV	7.1e-106
ZSDa006	ZSDa006_Chr17_gene_2448300_mRNA	Chr17	RLK	1	LRR_4#LRR_8	LRR-II	1.2e-137
ZSDa006	ZSDa006_Chr5_gene_0738700_mRNA	Chr5	RLK	1	LRRNT_2#LRR_8#LRR_4	LRR-III	5.6e-102
ZSDa006	ZSDa006_Chr15_gene_2273100_mRNA	Chr15	RLK	1	B_lectin#S_locus_glycop#PAN_2#B_lectin#S_locus_glycop#PAN_2	DLSV	5.8e-101
ZSDa006	ZSDa006_Chr2_gene_0243700_mRNA	Chr2	RLK	1	LRRNT_2#LRR_8#LRR_4#LRR_8#LRR_8#LRR_1#LRR_1#LRR_8#LRR_4#LRR_8	LRR-XI-1	2.7e-89
ZSDa006	ZSDa006_Chr3_gene_0381100_mRNA	Chr3	RLK	1	Lectin_legB	L-LEC	3.5e-104
ZSDa006	ZSDa006_Chr20_gene_2983500_mRNA	Chr20	RLK	1	LRR_8#LRR_1#LRR_4#LRR_4#Malectin	DLSV	9.9e-109
ZSDa006	ZSDa006_Chr15_gene_2268200_mRNA	Chr15	RLK	1	Stress-antifung#Stress-antifung	DLSV	4.9e-125
ZSDa006	ZSDa006_Chr17_gene_2408000_mRNA	Chr17	RLK	1	LRR_8#LRR_8#LRR_8#LRR_1#LRR_8#LRR_8#LRR_8#LRR_8	LRR-XII-1	2.6e-101
ZSDa006	ZSDa006_Chr5_gene_0737100_mRNA	Chr5	RLK	1	LRRNT_2#LRR_8#LRR_8#LRR_1	LRR-III	4.8e-94
ZSDa006	ZSDa006_Chr7_gene_1127900_mRNA	Chr7	RLK	1	GUB_WAK_bind#WAK#EGF_3#EGF_CA	WAK	5.9e-99
ZSDa006	ZSDa006_Chr20_gene_2983800_mRNA	Chr20	RLK	1	LRR_8#LRR_8#LRR_8#Malectin	DLSV	8.5e-106
ZSDa006	ZSDa006_Chr15_gene_2251500_mRNA	Chr15	RLK	1	B_lectin#S_locus_glycop#PAN_2	DLSV	3.2e-126
ZSDa006	ZSDa006_Chr17_gene_2517200_mRNA	Chr17	RLK	1	GUB_WAK_bind#WAK_assoc	LRK10L-2	2.2e-136
ZSDa006	ZSDa006_Chr5_gene_0615100_mRNA	Chr5	RLK	1	B_lectin#S_locus_glycop#PAN_1	SD-2b	1.3e-106
ZSDa006	ZSDa006_Chr8_gene_1159000_mRNA	Chr8	RLK	1	Lectin_legB	L-LEC	1e-116
ZSDa006	ZSDa006_Chr14_gene_1950400_mRNA	Chr14	RLK_WE	1	None	RLCK-IXa	1.3e-78
ZSDa006	ZSDa006_Chr13_gene_1821800_mRNA	Chr13	RLK	1	Lectin_legB	L-LEC	1.4e-121
ZSDa006	ZSDa006_Chr5_gene_0706800_mRNA	Chr5	RLK	1	LRRNT_2#LRR_8	LRR-VI-2	2.2e-108
ZSDa006	ZSDa006_Chr7_gene_1102800_mRNA	Chr7	RLK	1	LRRNT_2#LRR_8#LRR_8#LRR_8#LRR_8#LRR_8	LRR-III	7e-100
ZSDa006	ZSDa006_Chr4_gene_0489100_mRNA	Chr4	RLK	1	Stress-antifung#Stress-antifung#Stress-antifung#Stress-antifung	DLSV	3.2e-123
ZSDa006	ZSDa006_Chr7_gene_1132900_mRNA	Chr7	RLK	1	Lectin_legB	L-LEC	2.5e-108
ZSDa006	ZSDa006_Chr15_gene_2247800_mRNA	Chr15	RLK	1	Lectin_legB	L-LEC	7.1e-120
ZSDa006	ZSDa006_Chr5_gene_0744900_mRNA	Chr5	RLK	1	GUB_WAK_bind	LRK10L-2	7.1e-103
ZSDa006	ZSDa006_Chr17_gene_2423600_mRNA	Chr17	RLK	1	LRRNT_2#LRR_8#LRR_1#LRR_8#LRR_8#LRR_8#LRR_8#LRR_8#LRR_4#LRR_8	LRR-XII-1	6.2e-119
ZSDa006	ZSDa006_Chr2_gene_0187200_mRNA	Chr2	RLK	1	LysM#LysM	LysM	1e-54
ZSDa006	ZSDa006_Chr10_gene_1442900_mRNA	Chr10	RLK	1	LRRNT_2#LRR_8#LRR_4#LRR_4#LRR_8#LRR_8	LRR-XV	7.9e-109
ZSDa006	ZSDa006_Chr17_gene_2407500_mRNA	Chr17	RLK	1	LRRNT_2#LRR_8#LRR_8#LRR_8#LRR_1#LRR_1#LRR_1#LRR_8#LRR_8	LRR-XII-1	1.1e-122
ZSDa006	ZSDa006_Chr13_gene_1817800_mRNA	Chr13	RLK	1	Lectin_legB	L-LEC	3e-116
ZSDa006	ZSDa006_Chr15_gene_2247500_mRNA	Chr15	RLK	1	Lectin_legB	L-LEC	2.1e-120
ZSDa006	ZSDa006_Chr17_gene_2407800_mRNA	Chr17	RLK	1	LRRNT_2#LRR_8#LRR_8#LRR_4#LRR_8#LRR_8#LRR_8	LRR-XII-1	2.9e-85
ZSDa006	ZSDa006_Chr13_gene_1817500_mRNA	Chr13	RLK	1	Lectin_legB	L-LEC	2.4e-117
ZSDa006	ZSDa006_Chr20_gene_2984100_mRNA	Chr20	RLK	1	LRR_8#LRR_8#LRR_4#Malectin	DLSV	2.7e-108
ZSDa006	ZSDa006_Chr9_gene_1426700_mRNA	Chr9	RLK	1	GUB_WAK_bind#RANK_CRD_2	WAK_LRK10L-1	2.5e-121
ZSDa006	ZSDa006_Chr19_gene_2744900_mRNA	Chr19	RLK	1	LRRNT_2#LRR_8#LRR_8	LRR-II	2e-148
ZSDa006	ZSDa006_Chr7_gene_0988500_mRNA	Chr7	RLK	1	Stress-antifung#Stress-antifung	DLSV	2.1e-110
ZSDa006	ZSDa006_Chr2_gene_0136100_mRNA	Chr2	RLK	1	LRRNT_2#LRR_8#LRR_4#LRR_8#LRR_1#LRR_8#LRR_8#LRR_8#LRR_8#LRR_8	LRR-XI-1	4.6e-118
ZSDa006	ZSDa006_Chr17_gene_2423900_mRNA	Chr17	RLK	1	LRRNT_2#LRR_8#LRR_1#LRR_8#LRR_4#LRR_1#LRR_4#LRR_8	LRR-XII-1	2.6e-122
ZSDa006	ZSDa006_Chr3_gene_0341800_mRNA	Chr3	RLK_WE	1	None	LRR-I-2	1.3e-143
ZSDa006	ZSDa006_Chr9_gene_1371300_mRNA	Chr9	RLK	1	LRRNT_2#LRR_8#LRR_8#LRR_8#LRR_8#LRR_1#LRR_8#LRR_8#LRR_4#LRR_8	LRR-XI-1	7.3e-95
ZSDa006	ZSDa006_Chr8_gene_1144700_mRNA	Chr8	RLK	1	LRRNT_2#LRR_8#LRR_8#LRR_4#LRR_1#LRR_8#LRR_8#LRR_8	LRR-XV	9.6e-125
ZSDa006	ZSDa006_Chr7_gene_1111800_mRNA	Chr7	RLK	1	Lectin_legB	L-LEC	2.8e-107
ZSDa006	ZSDa006_Chr12_gene_1774800_mRNA	Chr12	RLK	1	Malectin_like	CrRLK1L-1	2.6e-136
ZSDa006	ZSDa006_Chr4_gene_0495700_mRNA	Chr4	RLK	1	Stress-antifung#Stress-antifung	DLSV	1.1e-108
ZSDa006	ZSDa006_Chr15_gene_2162100_mRNA	Chr15	RLK	1	LRRNT_2#LRR_4#LRR_8#LRR_4#LRR_4#LRR_8	LRR-XI-1	5.1e-104
ZSDa006	ZSDa006_Chr2_gene_0249300_mRNA	Chr2	RLK	1	LRRNT_2#LRR_1	LRR-XI-1	7.7e-78
ZSDa006	ZSDa006_Chr5_gene_0765000_mRNA	Chr5	RLK	1	LRRNT_2#LRR_4#LRR_8#LRR_1#LRR_8#LRRNT_2#LRR_8	LRR-IX	3.9e-142
ZSDa006	ZSDa006_Chr7_gene_0985700_mRNA	Chr7	RLK	1	Malectin_like	CrRLK1L-1	2.3e-137
ZSDa006	ZSDa006_Chr2_gene_0214300_mRNA	Chr2	RLK	1	LRRNT_2#LRR_8	LRR-VI-2	2.6e-95
ZSDa006	ZSDa006_Chr15_gene_2274500_mRNA	Chr15	RLK	1	B_lectin#S_locus_glycop#PAN_2	SD-2b	3.6e-116
ZSDa015	ZSDa015_Chr20_gene_203820_mRNA	Chr20	RLK	1	LRRNT_2#LRR_8	LRR-VI-2	9.1e-107
ZSDa015	ZSDa015_Chr15_gene_165010_mRNA	Chr15	RLK	1	B_lectin#S_locus_glycop#PAN_2	DLSV	3.7e-112
ZSDa015	ZSDa015_Chr17_gene_326550_mRNA	Chr17	RLK	1	LRRNT_2#LRR_8#LRR_8#LRR_8#LRR_8#LRR_4#LRR_4#LRR_8	LRR-XI-1	9.1e-101
ZSDa015	ZSDa015_Chr13_gene_260040_mRNA	Chr13	RLK	1	Lectin_legB	L-LEC	1e-115
ZSDa015	ZSDa015_Chr15_gene_163800_mRNA	Chr15	RLK	1	B_lectin#S_locus_glycop#PAN_2	DLSV	7.2e-128
ZSDa015	ZSDa015_Chr20_gene_214430_mRNA	Chr20	RLK	1	B_lectin#S_locus_glycop#PAN_2	DLSV	2.3e-124
ZSDa015	ZSDa015_Chr5_gene_122580_mRNA	Chr5	RLK	1	LRRNT_2#LRR_8#LRR_8#LRR_8#LRR_4#LRR_8#LRR_8#LRR_8#LRR_8#LRR_8#LRR_8	LRR-Xb-1	1.1e-124
ZSDa015	ZSDa015_Chr5_gene_127930_mRNA	Chr5	RLK	1	Malectin_like#LRR_8#LRR_4	LRR-I-1	5.2e-110
ZSDa015	ZSDa015_Chr17_gene_314720_mRNA	Chr17	RLK	1	GUB_WAK_bind	LRK10L-2	4.5e-136
ZSDa015	ZSDa015_Chr8_gene_48460_mRNA	Chr8	RLK	1	Stress-antifung#Stress-antifung	DLSV	5.6e-124
ZSDa015	ZSDa015_Chr2_gene_4960_mRNA	Chr2	RLK	1	LRRNT_2#LRR_8#LRR_8#LRR_4#LRR_8#LRR_1#LRR_8#LRR_1#LRR_8	LRR-XI-1	5e-90
ZSDa015	ZSDa015_Chr15_gene_157090_mRNA	Chr15	RLK	1	Lectin_legB	L-LEC	1.4e-119
ZSDa015	ZSDa015_Chr2_gene_12830_mRNA	Chr2	RLK	1	LRRNT_2#LRR_8#LRR_8#LRR_8#LRR_8#LRR_1#LRR_8#LRR_8#LRR_8#LRR_8#LRR_1#LRR_8	LRR-XI-1	6e-84
ZSDa015	ZSDa015_Chr7_gene_280470_mRNA	Chr7	RLK	1	GUB_WAK_bind#WAK#EGF_3#EGF_CA	WAK	8.7e-104
ZSDa015	ZSDa015_Chr4_gene_178130_mRNA	Chr4	RLK	1	Stress-antifung#Stress-antifung#Stress-antifung#Stress-antifung	DLSV	3.1e-123
ZSDa015	ZSDa015_Chr20_gene_211200_mRNA	Chr20	RLK	1	LRR_8#LRR_8#LRR_4#Malectin	DLSV	2.9e-108
ZSDa015	ZSDa015_Chr2_gene_5050_mRNA	Chr2	RLK	1	LRR_8#LRR_8#LRR_8#LRR_1#LRR_4#LRR_4#LRR_8#LRR_1#LRR_1#LRR_4	LRR-XI-1	5.9e-83
ZSDa015	ZSDa015_Chr13_gene_252990_mRNA	Chr13	RLK	1	Lectin_legB	L-LEC	1.5e-121
ZSDa015	ZSDa015_Chr5_gene_110070_mRNA	Chr5	RLK_WE	1	None	PERK-1	2.9e-151
ZSDa015	ZSDa015_Chr9_gene_337190_mRNA	Chr9	RLK	1	LRRNT_2#LRR_8#LRR_8#LRR_8#LRR_8	LRR-VIII-1	2.1e-132
ZSDa015	ZSDa015_Chr14_gene_87630_mRNA	Chr14	RLK_WE	1	None	IRE1	2e-139
ZSDa015	ZSDa015_Chr9_gene_334340_mRNA	Chr9	RLK_WE	1	None	RLCK-X	1.6e-148
ZSDa015	ZSDa015_Chr3_gene_33040_mRNA	Chr3	RLK	1	LRRNT_2#LRR_8#LRR_1	LRR-III	2.8e-98
ZSDa015	ZSDa015_Chr8_gene_51240_mRNA	Chr8	RLK_WE	1	None	RLCK-Os	9.1e-133
ZSDa015	ZSDa015_Chr5_gene_111320_mRNA	Chr5	RLK	1	LRRNT_2#LRR_8#LRR_8#LRR_1	LRR-III	1.9e-111
ZSDa015	ZSDa015_Chr17_gene_320930_mRNA	Chr17	RLK	1	LRRNT_2#LRR_8#LRR_8#LRR_8#LRR_8#LRR_4#LRR_8#LRR_4#LRR_8	LRR-XII-1	2.9e-85
ZSDa015	ZSDa015_Chr4_gene_174140_mRNA	Chr4	RLK	1	EGF_3#EGF_CA	WAK	5.2e-106
ZSDa015	ZSDa015_Chr13_gene_259860_mRNA	Chr13	RLK	1	Lectin_legB	L-LEC	1.9e-116
ZSDa015	ZSDa015_Chr14_gene_90150_mRNA	Chr14	RLK	1	LRRNT_2#LRR_4#LRR_4#LRR_1#LRR_8#LRR_1#LRR_8#LRR_8	LRR-XI-1	3.9e-101
ZSDa015	ZSDa015_Chr3_gene_39370_mRNA	Chr3	RLK	1	LRRNT_2#LRR_4#LRR_1#LRR_1#LRR_8#LRR_4#LRR_8#LRR_1#LRR_8	LRR-XI-1	5.5e-87
ZSDa015	ZSDa015_Chr13_gene_252800_mRNA	Chr13	RLK	1	LRRNT_2#LRR_8#LRR_8#LRR_1#LRR_8#LRR_8#LRR_8#LRR_8#LRR_8	LRR-XI-1	1.4e-119
ZSDa015	ZSDa015_Chr7_gene_298970_mRNA	Chr7	RLK_WE	1	None	RLCK-V	6.4e-158
ZSDa015	ZSDa015_Chr3_gene_37500_mRNA	Chr3	RLK_WE	1	None	LRR-I-2	2.4e-143
ZSDa015	ZSDa015_Chr17_gene_313820_mRNA	Chr17	RLK	1	LRRNT_2#LRR_8#LRR_8#LRR_1#LRR_8#LRR_1#LRR_8#LRR_8#LRR_8#LRR_1	LRR-XI-1	2.8e-100
ZSDa015	ZSDa015_Chr19_gene_153200_mRNA	Chr19	RLK	1	LRRNT_2#LRR_8#LRR_1	LRR-III	2.5e-88
ZSDa015	ZSDa015_Chr16_gene_59480_mRNA	Chr16	RLK	1	GUB_WAK_bind	LRK10L-2	1.1e-131
ZSDa015	ZSDa015_Chr18_gene_266660_mRNA	Chr18	RLK	1	LRRNT_2#LRR_8#LRR_8#LRRNT_2#LRR_8	LRR-IX	3.3e-150
ZSDa015	ZSDa015_Chr8_gene_49950_mRNA	Chr8	RLK	1	LRR_8#LRR_8	LRR-VI-1	2e-105
ZSDa015	ZSDa015_Chr5_gene_121080_mRNA	Chr5	RLK	1	LRR_8	LRR-III	3.4e-102
ZSDa015	ZSDa015_Chr17_gene_318020_mRNA	Chr17	RLK	1	B_lectin#S_locus_glycop#PAN_2	SD-2b	5.3e-108
ZSDa015	ZSDa015_Chr4_gene_189730_mRNA	Chr4	RLK	1	LRRNT_2#LRR_8#LRR_8#LRR_4#LRR_1#LRR_8#LRR_8#LRR_8#LRR_8#LRR_8	LRR-XI-1	2.6e-117
ZSDa015	ZSDa015_Chr15_gene_163830_mRNA	Chr15	RLK	1	B_lectin#S_locus_glycop#PAN_2	DLSV	2.3e-125
ZSDa015	ZSDa015_Chr9_gene_336660_mRNA	Chr9	RLK	1	LRRNT_2#LRR_8	LRR-VI-2	1.1e-117
ZSDa015	ZSDa015_Chr15_gene_163720_mRNA	Chr15	RLK	1	B_lectin#S_locus_glycop#PAN_2	SD-2b	2.9e-121
ZSDa015	ZSDa015_Chr9_gene_337030_mRNA	Chr9	RLK	1	LRRNT_2#LRR_8#LRR_4#LRR_8#LRR_1#LRR_8#LRR_8#LRR_1#LRR_8	LRR-VII-1	9.2e-130
ZSDa015	ZSDa015_Chr2_gene_5400_mRNA	Chr2	RLK	1	LRR_8#LRR_4#LRR_8#LRR_1#LRR_8#LRR_1#LRR_8#LRR_1#LRR_8#LRR_1#LRR_8#LRR_1#LRR_8#LRR_8#LRR_8#LRR_8#LRR_1#LRR_8	LRR-XI-1	4.7e-87
ZSDa015	ZSDa015_Chr17_gene_320170_mRNA	Chr17	RLK	1	LRR_8#LRR_4#LRR_1#LRR_4#LRR_8	LRR-XII-1	2.1e-123
ZSDa015	ZSDa015_Chr15_gene_169820_mRNA	Chr15	RLK	1	B_lectin#S_locus_glycop#PAN_2	DLSV	1.5e-117
ZSDa015	ZSDa015_Chr20_gene_209650_mRNA	Chr20	RLK	1	LRR_8#LRR_1#LRR_8#LRR_1	LRR-XI-1	8.4e-112
ZSDa015	ZSDa015_Chr8_gene_55290_mRNA	Chr8	RLK	1	Lectin_legB	L-LEC	2.5e-107
ZSDa015	ZSDa015_Chr2_gene_12840_mRNA	Chr2	RLK	1	LRRNT_2#LRR_8#LRR_8#LRR_8#LRR_8#LRR_4	LRR-XI-1	1.2e-82
ZSDa015	ZSDa015_Chr4_gene_183120_mRNA	Chr4	RLK	1	LRR_8#LRR_8#LRR_8	LRR-IX	3e-122
ZSDa015	ZSDa015_Chr8_gene_48510_mRNA	Chr8	RLK	1	Stress-antifung#Stress-antifung	DLSV	2.4e-122
ZSDa015	ZSDa015_Chr7_gene_288680_mRNA	Chr7	RLK	1	Malectin_like	CrRLK1L-1	1.4e-137
ZSDa015	ZSDa015_Chr2_gene_5230_mRNA	Chr2	RLK	1	LRRNT_2#LRR_4#LRR_8#LRR_4#LRR_1#LRR_8#LRR_1#LRR_8#LRR_1#LRR_8#LRR_8#LRR_1#LRR_8#LRR_8#LRR_4#LRR_8	LRR-XI-1	3.6e-89
ZSDa015	ZSDa015_Chr20_gene_207390_mRNA	Chr20	RLK	1	B_lectin#S_locus_glycop#PAN_2	DLSV	3e-108
ZSDa015	ZSDa015_Chr15_gene_160290_mRNA	Chr15	RLK	1	LRRNT_2#LRR_8#LRR_8#LRR_8#LRR_8#LRR_4#LRR_1#LRR_8#LRR_8#LRR_8	LRR-XI-1	9.2e-112
ZSDa015	ZSDa015_Chr15_gene_162550_mRNA	Chr15	RLK	1	B_lectin#S_locus_glycop#PAN_2	DLSV	8.9e-121
ZSDa015	ZSDa015_Chr7_gene_280480_mRNA	Chr7	RLK	1	GUB_WAK_bind#WAK#EGF_3#EGF_CA	WAK	8.2e-99
ZSDa015	ZSDa015_Chr16_gene_71340_mRNA	Chr16	RLK_WE	1	None	RLCK-XI	1.8e-104
ZSDa015	ZSDa015_Chr1_gene_215120_mRNA	Chr1	RLK_WE	1	None	RLCK-XVI	1.7e-144
ZSDa015	ZSDa015_Chr8_gene_48520_mRNA	Chr8	RLK	1	Stress-antifung#Stress-antifung	DLSV	7.3e-123
ZSDa015	ZSDa015_Chr15_gene_170330_mRNA	Chr15	RLK	1	LRR_4#LRR_8#LRR_8#Malectin	DLSV	5.9e-106
ZSDa015	ZSDa015_Chr8_gene_58000_mRNA	Chr8	RLK	1	LRRNT_2#LRR_8#LRR_8#LRR_4#LRR_1#LRR_8#LRR_8#LRR_4#LRR_1	LRR-XV	9.7e-125
ZSDa015	ZSDa015_Chr13_gene_260020_mRNA	Chr13	RLK	1	Lectin_legB	L-LEC	8.8e-118
ZSDa015	ZSDa015_Chr8_gene_30230_mRNA	Chr8	RLK	1	Glyco_hydro_2_N	L-LEC	2.8e-108
ZSDa015	ZSDa015_Chr5_gene_128340_mRNA	Chr5	RLK	1	S_locus_glycop#PAN_2	SD-2b	2.5e-121
ZSDa015	ZSDa015_Chr15_gene_170960_mRNA	Chr15	RLK	1	B_lectin#S_locus_glycop#PAN_2	DLSV	5.5e-121
ZSDa015	ZSDa015_Chr20_gene_211860_mRNA	Chr20	RLK	1	LRRNT_2#LRR_8#LRR_8#LRR_8#LRR_8#LRR_8#LRR_8#LRR_1	LRR-XI-1	7.5e-102
ZSDa015	ZSDa015_Chr17_gene_320920_mRNA	Chr17	RLK	2	LRR_8	LRR-XII-1	2.2e-218
ZSDa015	ZSDa015_Chr16_gene_59520_mRNA	Chr16	RLK	1	GUB_WAK_bind	LRK10L-2	6.5e-131
ZSDa015	ZSDa015_Chr15_gene_168680_mRNA	Chr15	RLK_WE	1	None	RLCK-IXa	3.9e-115
ZSDa015	ZSDa015_Chr3_gene_44340_mRNA	Chr3	RLK	1	LRRNT_2#LRR_4#LRR_1	LRR-III	5.8e-78
ZSDa015	ZSDa015_Chr16_gene_58460_mRNA	Chr16	RLK	1	LRRNT_2#LRR_4#LRR_8	LRR-XIIIa	5.4e-133
ZSDa015	ZSDa015_Chr8_gene_51210_mRNA	Chr8	RLK_WE	1	None	RLCK-Os	6.2e-64
ZSDa015	ZSDa015_Chr17_gene_325940_mRNA	Chr17	RLK	1	LRR_8#LRR_8	LRR-VII-2	2.1e-65
ZSDa015	ZSDa015_Chr15_gene_170860_mRNA	Chr15	RLK	1	B_lectin#S_locus_glycop#PAN_2	DLSV	8.3e-123
ZSDa015	ZSDa015_Chr17_gene_314830_mRNA	Chr17	RLK	1	GUB_WAK_bind	LRK10L-2	5.9e-135
ZSDa015	ZSDa015_Chr15_gene_163670_mRNA	Chr15	RLK	1	B_lectin#S_locus_glycop#PAN_2	SD-2b	1.2e-123
ZSDa015	ZSDa015_Chr17_gene_323180_mRNA	Chr17	RLK	1	LRRNT_2#LRR_8#LRR_1	LRR-III	2e-98
ZSDa015	ZSDa015_Chr19_gene_147030_mRNA	Chr19	RLK	1	SPARK	RKF3	3.7e-108
ZSDa015	ZSDa015_Chr12_gene_75480_mRNA	Chr12	RLK	1	Malectin_like	CrRLK1L-1	1.1e-140
ZSDa015	ZSDa015_Chr5_gene_118010_mRNA	Chr5	RLK	1	B_lectin#S_locus_glycop#PAN_2	SD-2b	2.2e-108
ZSDa015	ZSDa015_Chr2_gene_11790_mRNA	Chr2	RLK	1	LRRNT_2#LRR_8#LRR_8#LRR_8	LRR-XIV	2.9e-144
ZSDa015	ZSDa015_Chr2_gene_5370_mRNA	Chr2	RLK	1	LRRNT_2#LRR_8#LRR_4#LRR_4#LRR_8#LRR_1#LRR_8#LRR_8#LRR_1#LRR_8	LRR-XI-1	1.7e-86
ZSDa015	ZSDa015_Chr10_gene_244020_mRNA	Chr10	RLK	1	LRRNT_2#LRR_8#LRR_4#LRR_4#LRR_8#LRR_8	LRR-XV	8e-109
ZSDa015	ZSDa015_Chr2_gene_13460_mRNA	Chr2	RLK	1	LRRNT_2#LRR_4#LRR_1#LRR_8#LRR_8#LRR_8#LRR_1#LRR_8#LRR_8#LRR_8#LRR_8	LRR-XI-1	1.2e-111
ZSDa015	ZSDa015_Chr7_gene_280490_mRNA	Chr7	RLK	1	GUB_WAK_bind#WAK#EGF_3#EGF_CA	WAK	1.9e-105
ZSDa015	ZSDa015_Chr9_gene_338280_mRNA	Chr9	RLK	1	LRRNT_2#LRR_4#LRR_4	LRR-II	3.3e-149
ZSDa015	ZSDa015_Chr7_gene_289680_mRNA	Chr7	RLK	1	B_lectin#S_locus_glycop#PAN_1	SD-2b	1.6e-101
ZSDa015	ZSDa015_Chr7_gene_295830_mRNA	Chr7	RLK	1	Lectin_legB	L-LEC	1.8e-109
ZSDa015	ZSDa015_Chr5_gene_110210_mRNA	Chr5	RLK	1	GUB_WAK_bind#Rhabdo_ncap_2	LRK10L-2	3.1e-126
ZSDa015	ZSDa015_Chr10_gene_245970_mRNA	Chr10	RLK	1	LRR_1#LRR_8	LRR-Xa	5.6e-96
ZSDa015	ZSDa015_Chr3_gene_39410_mRNA	Chr3	RLK	1	LRRNT_2#LRR_8#LRR_1	LRR-III	6.8e-87
ZSDa015	ZSDa015_Chr15_gene_156140_mRNA	Chr15	RLK	1	Stress-antifung#Stress-antifung	DLSV	4.6e-121
ZSDa015	ZSDa015_Chr13_gene_259930_mRNA	Chr13	RLK	1	Lectin_legB	L-LEC	3e-113
ZSDa015	ZSDa015_Chr14_gene_88270_mRNA	Chr14	RLK	1	LRRNT_2#LRR_8#LRR_1#LRR_8#LRR_8#LRR_8#LRR_8	LRR-Xb-1	2.2e-125
ZSDa015	ZSDa015_Chr8_gene_48200_mRNA	Chr8	RLK	1	B_lectin#S_locus_glycop#PAN_2	SD-2b	2.1e-121
ZSDa015	ZSDa015_Chr12_gene_81390_mRNA	Chr12	RLK	1	LRRNT_2#LRR_8#Trypan_PARP	LRR-VI-2	6.7e-109
ZSDa015	ZSDa015_Chr13_gene_260140_mRNA	Chr13	RLK	1	LRRNT_2#LRR_4#LRR_8#LRR_8#LRR_8	LRR-XIV	5.6e-144
ZSDa015	ZSDa015_Chr15_gene_161450_mRNA	Chr15	RLK_WE	1	None	PERK-1	3.5e-151
ZSDa015	ZSDa015_Chr10_gene_238960_mRNA	Chr10	RLK	1	LRRNT_2#LRR_8#LRR_8	LRR-III	6.2e-90
ZSDa015	ZSDa015_Chr13_gene_259900_mRNA	Chr13	RLK	1	Lectin_legB	L-LEC	1.2e-117
ZSDa015	ZSDa015_Chr15_gene_156190_mRNA	Chr15	RLK	1	Stress-antifung	DLSV	1.9e-93
ZSDa015	ZSDa015_Chr4_gene_186660_mRNA	Chr4	RLK	1	LRR_8#LRR_1#LRR_1#LRR_8#LRR_1#LRR_8#LRR_8#LRR_1#LRR_8	LRR-XI-1	6.8e-97
ZSDa015	ZSDa015_Chr17_gene_320960_mRNA	Chr17	RLK	1	LRRNT_2#LRR_8#LRR_8#LRR_8#LRR_1#LRR_8#LRR_1#LRR_8	LRR-XII-1	7.8e-122
ZSDa015	ZSDa015_Chr17_gene_318830_mRNA	Chr17	RLK	1	LRRNT_2#LRR_8#LRR_1#LRR_4#LRR_4#LRR_4#LRR_8#LRR_8#LRR_8#LRR_8#LRR_8#LRR_8	LRR-XII-1	9.8e-120
ZSDa015	ZSDa015_Chr2_gene_5410_mRNA	Chr2	RLK	1	LRRNT_2#LRR_4#LRR_8#LRR_4#LRR_4#LRR_1#LRR_8#LRR_8#LRR_8#LRR_8	LRR-XI-1	2.2e-90
ZSDa015	ZSDa015_Chr20_gene_211110_mRNA	Chr20	RLK	1	LRR_8#LRR_4#LRR_4#Malectin	DLSV	2.8e-106
ZSDa015	ZSDa015_Chr15_gene_163820_mRNA	Chr15	RLK	1	B_lectin#S_locus_glycop#PAN_2	DLSV	4.9e-123
ZSDa015	ZSDa015_Chr13_gene_259950_mRNA	Chr13	RLK	1	Lectin_legB	L-LEC	3.8e-114
ZSDa015	ZSDa015_Chr17_gene_328340_mRNA	Chr17	RLK_WE	1	None	SD-2b	4.2e-101
ZSDa015	ZSDa015_Chr5_gene_126710_mRNA	Chr5	RLK	1	LRR_8#LRR_4	LRR-III	3e-101
ZSDa015	ZSDa015_Chr12_gene_75490_mRNA	Chr12	RLK	1	Malectin_like	CrRLK1L-1	2.6e-136
ZSDa015	ZSDa015_Chr15_gene_170950_mRNA	Chr15	RLK	1	B_lectin#S_locus_glycop#PAN_2	DLSV	8.7e-123
ZSDa015	ZSDa015_Chr5_gene_105240_mRNA	Chr5	RLK	1	B_lectin	SD-2b	1.8e-108
ZSDa015	ZSDa015_Chr5_gene_124480_mRNA	Chr5	RLK_WE	1	None	PERK-1	2.7e-125
ZSDa015	ZSDa015_Chr4_gene_191870_mRNA	Chr4	RLK	1	WAK_assoc	LRK10L-2	1.1e-84
ZSDa015	ZSDa015_Chr19_gene_135120_mRNA	Chr19	RLK	1	LRR_8#LRR_4#LRR_8	LRR-VIII-1	4.2e-133
ZSDa015	ZSDa015_Chr16_gene_59500_mRNA	Chr16	RLK	1	GUB_WAK_bind	LRK10L-2	2.9e-102
ZSDa015	ZSDa015_Chr15_gene_155930_mRNA	Chr15	RLK	1	B_lectin#S_locus_glycop#PAN_2	SD-2b	1.1e-119
ZSDa015	ZSDa015_Chr15_gene_170890_mRNA	Chr15	RLK	1	B_lectin#S_locus_glycop#PAN_2	DLSV	2.7e-122
ZSDa015	ZSDa015_Chr6_gene_227840_mRNA	Chr6	RLK	1	LRRNT_2#LRR_8#LRR_1#LRR_4	LRR-III	1.7e-32
ZSDa015	ZSDa015_Chr2_gene_5000_mRNA	Chr2	RLK	1	LRRNT_2#LRR_4#LRR_4#LRR_4#LRR_1#LRR_8#LRR_4#LRR_4#LRR_1#LRR_8#LRR_8#LRR_1#LRR_8	LRR-XI-1	1.7e-90
ZSDa015	ZSDa015_Chr14_gene_93230_mRNA	Chr14	RLK	1	B_lectin#PAN_2	SD-2b	8.4e-104
ZSDa015	ZSDa015_Chr17_gene_319210_mRNA	Chr17	RLK	1	B_lectin#S_locus_glycop#PAN_2	SD-2b	2.7e-113
ZSDa015	ZSDa015_Chr5_gene_109160_mRNA	Chr5	RLK	1	LRRNT_2#LRR_4#LRR_8#LRR_1#LRR_8#LRRNT_2#LRR_8	LRR-IX	3.9e-142
ZSDa015	ZSDa015_Chr8_gene_51170_mRNA	Chr8	RLK_WE	1	None	RLCK-Os	1.6e-134
ZSDa015	ZSDa015_Chr5_gene_112340_mRNA	Chr5	RLK	1	LRRNT_2#LRR_8	LRR-VI-2	5e-109
ZSDa015	ZSDa015_Chr8_gene_25260_mRNA	Chr8	RLK	1	LRRNT_2#LRR_8#LRR_8#LRR_8#LRR_8#LRR_1#LRR_8#LRR_1	LRR-XII-1	3.7e-100
ZSDa015	ZSDa015_Chr14_gene_93260_mRNA	Chr14	RLK	1	B_lectin#PAN_2	SD-2b	4.3e-105
ZSDa015	ZSDa015_Chr4_gene_186010_mRNA	Chr4	RLK_WE	1	None	RLCK-XI	9.6e-115
ZSDa015	ZSDa015_Chr5_gene_124430_mRNA	Chr5	RLK_WE	1	None	PERK-1	5.2e-118
ZSDa015	ZSDa015_Chr9_gene_337200_mRNA	Chr9	RLK	1	LRRNT_2#LRR_8#LRR_8#LRR_8#LRR_8	LRR-VIII-1	2e-132
ZSDa015	ZSDa015_Chr5_gene_114020_mRNA	Chr5	RLK	1	B_lectin#PAN_1	SD-2b	9.9e-118
ZSDa015	ZSDa015_Chr18_gene_272850_mRNA	Chr18	RLK	1	LRRNT_2#LRR_8	LRR-II	1.1e-148
ZSDa015	ZSDa015_Chr5_gene_110630_mRNA	Chr5	RLK	1	GUB_WAK_bind#WAK_assoc	LRK10L-2	2.6e-134
ZSDa015	ZSDa015_Chr15_gene_165240_mRNA	Chr15	RLK	1	LRRNT_2#LRR_8	LRR-XIIIa	7.8e-130
ZSDa015	ZSDa015_Chr4_gene_174120_mRNA	Chr4	RLK	1	GUB_WAK_bind#EGF#EGF_CA	WAK	1.2e-106
ZSDa015	ZSDa015_Chr13_gene_259980_mRNA	Chr13	RLK	1	Lectin_legB	L-LEC	2.4e-119
ZSDa015	ZSDa015_Chr20_gene_208070_mRNA	Chr20	RLK	1	B_lectin#S_locus_glycop#PAN_2	DLSV	3.3e-120
ZSDa015	ZSDa015_Chr15_gene_163840_mRNA	Chr15	RLK	1	B_lectin#S_locus_glycop#PAN_2	DLSV	3e-125
ZSDa015	ZSDa015_Chr16_gene_63560_mRNA	Chr16	RLK_WE	1	None	LRK10L-2	7.3e-125
ZSDa015	ZSDa015_Chr7_gene_297070_mRNA	Chr7	RLK_WE	1	None	RLCK-IXa	5.5e-121
ZSDa015	ZSDa015_Chr17_gene_326530_mRNA	Chr17	RLK	1	LRR_8#LRR_4#LRR_8	LRR-XI-1	7.6e-105
ZSDa015	ZSDa015_Chr2_gene_4800_mRNA	Chr2	RLK	1	LRRNT_2#LRR_8#LRR_8#LRR_8#LRR_1#LRR_8#LRR_4#LRR_4#LRR_1#LRR_8#LRR_8#LRR_1#LRR_8	LRR-XI-1	1.1e-93
ZSDa015	ZSDa015_Chr18_gene_279120_mRNA	Chr18	RLK	1	LRRNT_2#LRR_8#LRR_1#LRR_8#LRR_8#LRR_4#LRR_8#LRR_8	LRR-XIIIb	2.9e-155
ZSDa015	ZSDa015_Chr11_gene_310140_mRNA	Chr11	RLK	1	LRRNT_2#LRR_8#LRR_8#LRR_1#LRR_8#LRR_8#LRR_8#LRR_8	LRR-XI-1	1.2e-111
ZSDa015	ZSDa015_Chr15_gene_156180_mRNA	Chr15	RLK	1	Stress-antifung	DLSV	1.1e-106
ZSDa015	ZSDa015_Chr8_gene_22220_mRNA	Chr8	RLK	1	B_lectin#S_locus_glycop#PAN_2	SD-2b	4.3e-125
ZSDa015	ZSDa015_Chr19_gene_134130_mRNA	Chr19	RLK	1	LRR_8#LRR_4#LRR_8#LRR_1#Malectin	DLSV	2.7e-112
ZSDa015	ZSDa015_Chr19_gene_134160_mRNA	Chr19	RLK	1	LRR_8#LRR_1#LRR_1#LRR_8#Malectin	DLSV	2.7e-98
ZSDa015	ZSDa015_Chr10_gene_240650_mRNA	Chr10	RLK	1	LRR_4#LRR_8	LRR-VII-1	7.5e-126
ZSDa015	ZSDa015_Chr5_gene_110610_mRNA	Chr5	RLK	1	GUB_WAK_bind#WAK_assoc	LRK10L-2	8.9e-132
ZSDa015	ZSDa015_Chr13_gene_260050_mRNA	Chr13	RLK	1	Lectin_legB	L-LEC	9.8e-117
ZSDa015	ZSDa015_Chr10_gene_238130_mRNA	Chr10	RLK_WE	1	None	RLCK-V	1.4e-157
ZSDa015	ZSDa015_Chr17_gene_327380_mRNA	Chr17	RLK	1	LRRNT_2#LRR_8#LRR_1#LRR_8#LRR_8#LRR_8#LRR_8#LRR_8#LRR_4#LRR_8	LRR-XII-1	4.2e-121
ZSDa015	ZSDa015_Chr16_gene_59470_mRNA	Chr16	RLK	1	GUB_WAK_bind	LRK10L-2	9.5e-104
ZSDa015	ZSDa015_Chr18_gene_270730_mRNA	Chr18	RLK	1	LRRNT_2#LRR_8#LRR_8#LRR_1	LRR-III	5.3e-91
ZSDa015	ZSDa015_Chr13_gene_252570_mRNA	Chr13	RLK	1	Lectin_legB	L-LEC	1.2e-119
ZSDa015	ZSDa015_Chr15_gene_162510_mRNA	Chr15	RLK	1	B_lectin#S_locus_glycop#PAN_2	DLSV	1.3e-117
ZSDa015	ZSDa015_Chr17_gene_326060_mRNA	Chr17	RLK	1	B_lectin#S_locus_glycop#PAN_1	SD-2b	1.2e-98
ZSDa015	ZSDa015_Chr4_gene_183130_mRNA	Chr4	RLK	1	LRR_8#LRR_8#LRR_8	LRR-IX	3.7e-77
ZSDa015	ZSDa015_Chr12_gene_80990_mRNA	Chr12	RLK	1	Malectin_like	CrRLK1L-1	2e-151
ZSDa015	ZSDa015_Chr20_gene_205890_mRNA	Chr20	RLK	1	LRRNT_2#LRR_1#LRR_8#LRR_8#LRR_8#LRR_1#LRR_8#LRR_4	LRR-XII-1	3.5e-121
ZSDa015	ZSDa015_Chr3_gene_40840_mRNA	Chr3	RLK_WE	1	None	DLSV	1e-111
ZSDa015	ZSDa015_Chr4_gene_181750_mRNA	Chr4	RLK	1	SPARK	RKF3	6.6e-103
ZSDa015	ZSDa015_Chr15_gene_163770_mRNA	Chr15	RLK	1	B_lectin#S_locus_glycop#PAN_2	DLSV	8.1e-128
ZSDa015	ZSDa015_Chr15_gene_165150_mRNA	Chr15	RLK	1	Lectin_legB	L-LEC	7e-120
ZSDa015	ZSDa015_Chr17_gene_328190_mRNA	Chr17	RLK	1	LRRNT_2#LRR_8#LRR_8#LRR_8#LRR_4#LRR_8#LRR_8#LRR_8	LRR-XII-1	4.8e-120
ZSDa015	ZSDa015_Chr8_gene_51290_mRNA	Chr8	RLK_WE	1	None	RLCK-Os	1.1e-150
ZSDa015	ZSDa015_Chr8_gene_22230_mRNA	Chr8	RLK	1	B_lectin#S_locus_glycop#PAN_2	SD-2b	1e-124
ZSDa015	ZSDa015_Chr15_gene_170970_mRNA	Chr15	RLK	1	B_lectin#S_locus_glycop#PAN_2	DLSV	1.1e-122
ZSDa015	ZSDa015_Chr11_gene_311290_mRNA	Chr11	RLK	1	LRRNT_2#LRR_8	LRR-III	5.5e-89
ZSDa015	ZSDa015_Chr12_gene_75300_mRNA	Chr12	RLK	1	LRR_4#LRR_8#LRR_8#LRR_8#LRR_8#LRR_8#LRR_8	LRR-XI-1	2.4e-85
ZSDa015	ZSDa015_Chr2_gene_13450_mRNA	Chr2	RLK	1	LRRNT_2#LRR_1#LRR_8#LRR_8#LRR_8#LRR_8#LRR_8#LRR_8#LRR_4#LRR_8	LRR-XI-1	3.6e-89
ZSDa015	ZSDa015_Chr19_gene_133220_mRNA	Chr19	RLK_WE	1	None	Extensin	6e-132
ZSDa015	ZSDa015_Chr3_gene_44230_mRNA	Chr3	RLK_WE	1	None	URK-2	3.5e-102
ZSDa015	ZSDa015_Chr4_gene_181290_mRNA	Chr4	RLK_WE	1	None	RLCK-V	1e-155
ZSDa015	ZSDa015_Chr1_gene_216480_mRNA	Chr1	RLK	1	LRRNT_2#LRR_1#LRR_1	LRR-VI-2	1.7e-100
ZSDa015	ZSDa015_Chr7_gene_297060_mRNA	Chr7	RLK_WE	1	None	RLCK-IXa	1.3e-118
ZSDa015	ZSDa015_Chr19_gene_152000_mRNA	Chr19	RLK	1	B_lectin#S_locus_glycop#PAN_2	DLSV	5.9e-122
ZSDa015	ZSDa015_Chr17_gene_326090_mRNA	Chr17	RLK	1	B_lectin#S_locus_glycop#PAN_2	SD-2b	5.1e-115
ZSDa015	ZSDa015_Chr12_gene_75290_mRNA	Chr12	RLK	1	LRR_8#LRR_1#LRR_8#LRR_8#LRR_4#LRR_8#LRR_4#LRR_8#LRR_8#LRR_8#LRR_1#LRR_8	LRR-XI-1	1.7e-87
ZSDa015	ZSDa015_Chr19_gene_140730_mRNA	Chr19	RLK	1	LRRNT_2#LRR_8#LRR_4	LRR-III	2.5e-105
ZSDa015	ZSDa015_Chr15_gene_162450_mRNA	Chr15	RLK	1	B_lectin#S_locus_glycop#PAN_2	DLSV	2.4e-122
ZSDa015	ZSDa015_Chr17_gene_327440_mRNA	Chr17	RLK	1	LRR_4#LRR_8	LRR-VI-1	2.7e-100
ZSDa015	ZSDa015_Chr17_gene_327320_mRNA	Chr17	RLK	1	LRRNT_2#LRR_8#LRR_8#LRR_8#LRR_8#LRR_8#LRR_8#LRR_1#LRR_8	LRR-XII-1	7.9e-121
ZSDa015	ZSDa015_Chr4_gene_187030_mRNA	Chr4	RLK	1	LRRNT_2#LRR_8#LRR_4	LRR-III	7.9e-107
ZSDa015	ZSDa015_Chr18_gene_268650_mRNA	Chr18	RLK	1	B_lectin#S_locus_glycop#PAN_1	SD-2b	2.7e-108
ZSDa015	ZSDa015_Chr13_gene_260080_mRNA	Chr13	RLK	1	LRRNT_2#LRR_8#LRR_8#LRR_8#LRR_1#LRR_8#LRR_8#LRR_8	LRR-XI-1	4.1e-110
ZSDa015	ZSDa015_Chr15_gene_163680_mRNA	Chr15	RLK	1	B_lectin#S_locus_glycop#PAN_2	SD-2b	1.4e-119
ZSDa015	ZSDa015_Chr2_gene_4970_mRNA	Chr2	RLK	1	LRRNT_2#LRR_8#LRR_1#LRR_8#LRR_1#LRR_4#LRR_8#LRR_8#LRR_8	LRR-XI-1	2.2e-90
ZSDa015	ZSDa015_Chr15_gene_170910_mRNA	Chr15	RLK	1	B_lectin#S_locus_glycop#PAN_2	DLSV	9e-122
ZSDa015	ZSDa015_Chr13_gene_252550_mRNA	Chr13	RLK	1	Lectin_legB	L-LEC	1.2e-116
ZSDa015	ZSDa015_Chr19_gene_145030_mRNA	Chr19	RLK_WE	1	None	LRR-XI-1	1.2e-76
ZSDa015	ZSDa015_Chr19_gene_139610_mRNA	Chr19	RLK	1	LRRNT_2#LRR_8#LRR_8#LRR_1#LRR_1#LRR_4#LRR_8#LRR_8#LRR_8	LRR-XII-1	6e-96
ZSDa015	ZSDa015_Chr13_gene_260030_mRNA	Chr13	RLK	1	Lectin_legB	L-LEC	6.4e-116
ZSDa015	ZSDa015_Chr5_gene_127720_mRNA	Chr5	RLK	1	LRR_4#LRR_8	LRR-XI-2	1.3e-97
ZSDa015	ZSDa015_Chr17_gene_320970_mRNA	Chr17	RLK	1	LRRNT_2#LRR_4#LRR_8#LRR_8#LRR_4#LRR_8#LRR_8#LRR_8	LRR-XII-1	7.8e-86
ZSDa015	ZSDa015_Chr18_gene_273840_mRNA	Chr18	RLK	1	LRRNT_2#LRR_6#LRR_8#LRR_1	LRR-V	1.3e-142
ZSDa015	ZSDa015_Chr13_gene_252560_mRNA	Chr13	RLK	1	Lectin_legB	L-LEC	1.5e-115
ZSDa015	ZSDa015_Chr17_gene_325960_mRNA	Chr17	RLK	1	LRR_4#LRR_8	LRR-II	1.2e-137
ZSDa015	ZSDa015_Chr15_gene_155940_mRNA	Chr15	RLK	1	B_lectin#S_locus_glycop#PAN_2	SD-2b	3.4e-116
ZSDa015	ZSDa015_Chr8_gene_49580_mRNA	Chr8	RLK	1	LRRNT_2#LRR_4#LRR_4	LRR-III	3.4e-70
ZSDa015	ZSDa015_Chr19_gene_134180_mRNA	Chr19	RLK	1	LRR_8#LRR_4#LRR_8#Malectin	DLSV	2.7e-112
ZSDa015	ZSDa015_Chr15_gene_162480_mRNA	Chr15	RLK	1	B_lectin#S_locus_glycop#PAN_2	DLSV	2e-121
ZSDa015	ZSDa015_Chr8_gene_22280_mRNA	Chr8	RLK	1	B_lectin#S_locus_glycop#PAN_2	DLSV	1.6e-125
ZSDa015	ZSDa015_Chr4_gene_177980_mRNA	Chr4	RLK_WE	1	None	PERK-1	1e-77
ZSDa015	ZSDa015_Chr12_gene_79680_mRNA	Chr12	RLK_WE	1	None	Extensin	6.3e-146
ZSDa015	ZSDa015_Chr8_gene_57210_mRNA	Chr8	RLK	1	Lectin_legB	L-LEC	1.1e-118
ZSDa015	ZSDa015_Chr8_gene_31650_mRNA	Chr8	RLK	1	Lectin_legB	L-LEC	1.6e-112
ZSDa015	ZSDa015_Chr11_gene_306130_mRNA	Chr11	RLK	1	LRR_1#LRR_4#LRR_4	LRR-III	3.3e-83
ZSDa015	ZSDa015_Chr15_gene_163070_mRNA	Chr15	RLK	1	LRRNT_2#LRR_8#LRR_8#LRR_8#LRR_1#LRR_8#LRR_1#LRR_8#LRR_4	LRR-XV	2.6e-125
ZSDa015	ZSDa015_Chr8_gene_26840_mRNA	Chr8	RLK	1	LRRNT_2#LRR_8#LRR_1	LRR-III	7.5e-82
ZSDa015	ZSDa015_Chr15_gene_162490_mRNA	Chr15	RLK	1	S_locus_glycop#PAN_2	DLSV	1.1e-118
ZSDa015	ZSDa015_Chr15_gene_165870_mRNA	Chr15	RLK	1	Malectin_like#LRR_8	LRR-I-1	1.6e-105
ZSDa015	ZSDa015_Chr19_gene_140990_mRNA	Chr19	RLK	1	LRRNT_2#LRR_8#LRR_8	LRR-II	1.6e-148
ZSDa015	ZSDa015_Chr8_gene_48470_mRNA	Chr8	RLK	1	Stress-antifung#Stress-antifung	DLSV	4.7e-124
ZSDa015	ZSDa015_Chr17_gene_326070_mRNA	Chr17	RLK	1	B_lectin#S_locus_glycop#PAN_1	SD-2b	4.9e-99
ZSDa015	ZSDa015_Chr16_gene_63550_mRNA	Chr16	RLK	1	GUB_WAK_bind	LRK10L-2	1.7e-128
ZSDa015	ZSDa015_Chr5_gene_107570_mRNA	Chr5	RLK	1	LRRNT_2#LRR_1#LRR_8	LRR-II	5e-156
ZSDa015	ZSDa015_Chr15_gene_166880_mRNA	Chr15	RLK	1	B_lectin#S_locus_glycop#PAN_2	SD-2b	2.4e-116
ZSDa015	ZSDa015_Chr13_gene_260390_mRNA	Chr13	RLK_WE	1	None	PERK-1	2.5e-156
ZSDa015	ZSDa015_Chr4_gene_192860_mRNA	Chr4	RLK	1	LRRNT_2#LRR_8#LRR_8#LRR_8#LRR_8#LRR_1#LRR_4#LRR_8	LRR-XI-1	2.8e-101
ZSDa015	ZSDa015_Chr5_gene_128090_mRNA	Chr5	RLK	1	LRRNT_2#LRR_8#LRR_8#LRR_8#LRR_1#LRR_8#LRR_4#LRR_8	LRR-XI-1	1.4e-82
ZSDa015	ZSDa015_Chr17_gene_321440_mRNA	Chr17	RLK	1	LRRNT_2#LRR_1#LRR_8	LRR-II	1.5e-152
ZSDa015	ZSDa015_Chr7_gene_291350_mRNA	Chr7	RLK	1	LRRNT_2#LRR_8#LRR_8#LRR_8#LRR_8#LRR_8	LRR-III	7e-100
ZSDa015	ZSDa015_Chr8_gene_27240_mRNA	Chr8	RLK	2	LRRNT_2#LRR_8#LRR_8	LRR-III	7.9e-74
ZSDa015	ZSDa015_Chr11_gene_311300_mRNA	Chr11	RLK	1	LRRNT_2#LRR_8#LRR_8#LRR_8#LRR_8#LRR_8#LRR_1#LRR_8	LRR-Xb-1	2.7e-130
ZSDa015	ZSDa015_Chr5_gene_126860_mRNA	Chr5	RLK	1	LRRNT_2#LRR_8#LRR_1#LRR_1#LRR_8#LRR_1#LRR_8#LRR_8#LRR_8	LRR-XII-1	4.4e-121
ZSDa015	ZSDa015_Chr7_gene_295820_mRNA	Chr7	RLK	1	B_lectin#S_locus_glycop#PAN_2	DLSV	2.6e-122
ZSDa015	ZSDa015_Chr9_gene_341680_mRNA	Chr9	RLK	1	LRR_8#LRR_1#LRR_1	LRR-V	5.9e-119
ZSDa015	ZSDa015_Chr15_gene_169670_mRNA	Chr15	RLK	1	LRRNT_2#LRR_8#LRR_8#LRR_8#LRR_1#LRR_4#LRR_6#LRR_8	LRR-III	2.8e-83
ZSDa015	ZSDa015_Chr5_gene_122720_mRNA	Chr5	RLK_WE	1	None	URK-2	8.1e-99
ZSDa015	ZSDa015_Chr13_gene_260850_mRNA	Chr13	RLK	1	LRRNT_2#LRR_8#LRR_8#LRR_8#LRR_1#LRR_8#LRR_8#LRR_8#LRR_8	LRR-Xb-2	1.6e-118
ZSDa015	ZSDa015_Chr15_gene_164090_mRNA	Chr15	RLK	1	Stress-antifung#Stress-antifung	DLSV	4.9e-125
ZSDa015	ZSDa015_Chr19_gene_153370_mRNA	Chr19	RLK	1	LRR_4#LRR_8#LRR_4#LRR_4#LRR_8#LRR_8	LRR-III	1.6e-75
ZSDa015	ZSDa015_Chr15_gene_160310_mRNA	Chr15	RLK	1	LRRNT_2#LRR_8#LRR_1#LRR_8#LRR_4#LRR_8	LRR-XI-1	1.2e-88
ZSDa015	ZSDa015_Chr16_gene_59460_mRNA	Chr16	RLK	1	GUB_WAK_bind	LRK10L-2	3.9e-127
ZSDa015	ZSDa015_Chr17_gene_320760_mRNA	Chr17	RLK	2	Kinase#LRRNT_2#LRR_8#LRR_8#LRR_8#LRR_8#LRR_8#LRR_8	LRR-XII-1	3.5e-220
ZSDa015	ZSDa015_Chr3_gene_34090_mRNA	Chr3	RLK	1	LRRNT_2#LRR_8#LRR_8#LRR_1#LRR_8#LRR_1#LRR_1#LRR_8#LRR_8	LRR-XII-1	1.7e-105
ZSDa015	ZSDa015_Chr15_gene_160270_mRNA	Chr15	RLK	1	LRRNT_2#LRR_8#LRR_8#LRR_8#LRR_8#LRR_4#LRR_4#LRR_8#LRR_8#LRR_8	LRR-XI-1	5.9e-94
ZSDa015	ZSDa015_Chr15_gene_155970_mRNA	Chr15	RLK	1	B_lectin#S_locus_glycop#PAN_2	DLSV	3.3e-105
ZSDa015	ZSDa015_Chr17_gene_319200_mRNA	Chr17	RLK	1	B_lectin#S_locus_glycop#PAN_2	SD-2b	1.7e-108
ZSDa015	ZSDa015_Chr4_gene_181340_mRNA	Chr4	RLK	1	WAK_assoc	LRK10L-2	7e-134
ZSDa015	ZSDa015_Chr15_gene_158440_mRNA	Chr15	RLK	1	LRR_8#LRR_8#LRR_8	LRR-VI-1	3.8e-115
ZSDa015	ZSDa015_Chr14_gene_98530_mRNA	Chr14	RLK_WE	1	None	RLCK-IXa	1.3e-116
ZSDa015	ZSDa015_Chr2_gene_13440_mRNA	Chr2	RLK	1	LRRNT_2#LRR_1#LRR_4#LRR_8#LRR_8#LRR_8#LRR_1#LRR_8#LRR_8#LRR_8#LRR_4	LRR-XI-1	1.1e-90
ZSDa015	ZSDa015_Chr5_gene_117660_mRNA	Chr5	RLK	1	LRR_1#LRR_8#LRR_8#LRR_4#LRR_8#LRR_1#LRR_4#LRR_8	LRR-XI-1	5.2e-71
ZSDa015	ZSDa015_Chr8_gene_57170_mRNA	Chr8	RLK	1	Lectin_legB	L-LEC	8.3e-118
ZSDa015	ZSDa015_Chr20_gene_206050_mRNA	Chr20	RLK_WE	1	None	RLCK-V	1.2e-158
ZSDa015	ZSDa015_Chr14_gene_100000_mRNA	Chr14	RLK	1	SPARK	URK-1	1.9e-147
ZSDa015	ZSDa015_Chr2_gene_12290_mRNA	Chr2	RLK	1	LysM#LysM	LysM	3e-97
ZSDa015	ZSDa015_Chr15_gene_163870_mRNA	Chr15	RLK	1	B_lectin#S_locus_glycop#PAN_2	DLSV	5e-113
ZSDa015	ZSDa015_Chr3_gene_43100_mRNA	Chr3	RLK	1	LRRNT_2#LRR_8	LRR-III	8.9e-87
ZSDa015	ZSDa015_Chr2_gene_5040_mRNA	Chr2	RLK	1	LRRNT_2#LRR_8#LRR_4#LRR_8#LRR_8#LRR_8#LRR_8#LRR_1#LRR_8#LRR_8#LRR_8#LRR_8	LRR-XI-1	1.2e-87
ZSDa015	ZSDa015_Chr4_gene_181760_mRNA	Chr4	RLK_WE	1	None	RKF3	1.5e-103
ZSDa015	ZSDa015_Chr20_gene_211230_mRNA	Chr20	RLK	1	LRR_8#LRR_8#LRR_8#Malectin	DLSV	4.2e-106
ZSDa015	ZSDa015_Chr18_gene_264680_mRNA	Chr18	RLK	1	LRRNT_2#LRR_8	LRR-VI-2	6e-98
ZSDa015	ZSDa015_Chr15_gene_157340_mRNA	Chr15	RLK	1	GUB_WAK_bind#WAK_assoc	WAK_LRK10L-1	8.3e-114
ZSDa015	ZSDa015_Chr17_gene_326540_mRNA	Chr17	RLK	1	LRRNT_2#LRR_8#LRR_8#LRR_8#LRR_1#LRR_1#LRR_8#LRR_8#LRR_8#LRR_8	LRR-XI-1	2.1e-105
ZSDa015	ZSDa015_Chr2_gene_13420_mRNA	Chr2	RLK	1	LRRNT_2#LRR_8#LRR_4#LRR_4#LRR_4#LRR_1#LRR_4#LRR_8#LRR_8#LRR_8	LRR-XI-1	1.2e-88
ZSDa015	ZSDa015_Chr8_gene_51220_mRNA	Chr8	RLK_WE	1	None	RLCK-Os	2.4e-131
ZSDa015	ZSDa015_Chr9_gene_337300_mRNA	Chr9	RLK	1	LRRNT_2#LRR_4#LRR_8#LRR_4	LRR-VIII-1	2.6e-128
ZSDa015	ZSDa015_Chr2_gene_5160_mRNA	Chr2	RLK	1	LRR_8#LRR_8#LRR_8#LRR_1#LRR_4#LRR_4#LRR_4#LRR_8#LRR_1#LRR_4#LRR_4#LRR_8#LRR_8#LRR_8#LRR_4#LRR_8	LRR-XI-1	1.8e-88
ZSDa015	ZSDa015_Chr17_gene_326490_mRNA	Chr17	RLK	1	LRRNT_2#LRR_8#LRR_8#LRR_8#LRR_1#LRR_1#LRR_4#LRR_8	LRR-XI-1	2.1e-106
ZSDa015	ZSDa015_Chr12_gene_75310_mRNA	Chr12	RLK	1	LRR_8#LRR_8#LRR_8#LRR_1#LRR_4#LRR_1	LRR-XI-1	7.1e-85
ZSDa015	ZSDa015_Chr13_gene_252540_mRNA	Chr13	RLK	1	LysM#LysM	LysM	1.8e-77
ZSDa015	ZSDa015_Chr10_gene_247970_mRNA	Chr10	RLK	1	Lectin_legB	L-LEC	7.9e-120
ZSDa015	ZSDa015_Chr2_gene_9060_mRNA	Chr2	RLK_WE	1	None	RLCK-IXa	1.4e-62
ZSDa015	ZSDa015_Chr4_gene_188820_mRNA	Chr4	RLK	1	Stress-antifung#Stress-antifung#Stress-antifung#Stress-antifung	DLSV	3.5e-122
ZSDa015	ZSDa015_Chr4_gene_188100_mRNA	Chr4	RLK	1	Malectin	DLSV	7.3e-108
ZSDa015	ZSDa015_Chr5_gene_126360_mRNA	Chr5	RLK	1	LRRNT_2#LRR_8#LRR_4#LRR_4#LRR_8#LRR_8#LRR_4#LRR_1#LRR_8#LRR_8#LRR_1	LRR-XI-1	1.8e-110
ZSDa015	ZSDa015_Chr10_gene_247080_mRNA	Chr10	RLK	1	LRR_8#LRR_1#LRR_8#LRR_8	LRR-XI-1	3.3e-111
ZSDa015	ZSDa015_Chr5_gene_110230_mRNA	Chr5	RLK	1	GUB_WAK_bind	LRK10L-2	1.6e-117
ZSDa015	ZSDa015_Chr11_gene_306800_mRNA	Chr11	RLK_WE	1	None	RLCK-XVI	3.7e-145
ZSDa015	ZSDa015_Chr15_gene_165180_mRNA	Chr15	RLK_WE	1	None	DLSV	6.2e-103
ZSDa015	ZSDa015_Chr15_gene_163850_mRNA	Chr15	RLK	1	B_lectin#S_locus_glycop#PAN_2	DLSV	1.6e-126
ZSDa015	ZSDa015_Chr1_gene_220790_mRNA	Chr1	RLK	1	LRRNT_2#LRR_8#LRR_8#LRR_8#LRR_8#LRR_8#LRR_8#LRR_8	LRR-XI-1	4.6e-106
ZSDa015	ZSDa015_Chr1_gene_225430_mRNA	Chr1	RLK	1	LRRNT_2#LRR_1#LRR_4#LRR_8#LRR_4#LRR_8#LRR_4#LRR_8#LRR_1	LRR-XIIIb	4.3e-151
ZSDa015	ZSDa015_Chr16_gene_64820_mRNA	Chr16	RLK	1	LRRNT_2#LRR_8#LRR_8#LRR_1	LRR-V	1.1e-143
ZSDa015	ZSDa015_Chr12_gene_75500_mRNA	Chr12	RLK	1	Malectin_like	CrRLK1L-1	1.9e-140
ZSDa015	ZSDa015_Chr5_gene_118470_mRNA	Chr5	RLK	1	LRRNT_2#LRR_4#LRR_4	LRR-III	6.6e-108
ZSDa015	ZSDa015_Chr2_gene_15120_mRNA	Chr2	RLK	1	LRRNT_2#LRR_8#LRR_4#LRR_8#LRR_1#LRR_8#LRR_8#LRR_8#LRR_8#LRR_1#LRR_8	LRR-XI-1	1.5e-108
ZSDa015	ZSDa015_Chr1_gene_215810_mRNA	Chr1	RLK_WE	1	None	Extensin	3.5e-148
ZSDa015	ZSDa015_Chr5_gene_118020_mRNA	Chr5	RLK	1	S_locus_glycop#PAN_2	SD-2b	5.5e-106
ZSDa015	ZSDa015_Chr14_gene_96200_mRNA	Chr14	RLK	1	LRRNT_2#LRR_8#LRR_8#LRR_1	LRR-IV	1e-132
ZSDa015	ZSDa015_Chr4_gene_178580_mRNA	Chr4	RLK_WE	1	None	RLCK-V	2.1e-158
ZSDa015	ZSDa015_Chr8_gene_26790_mRNA	Chr8	RLK	1	LRRNT_2#LRR_8	LRR-II	1.1e-146
ZSDa015	ZSDa015_Chr8_gene_26990_mRNA	Chr8	RLK_WE	1	None	LRR-III	1e-75
ZSDa015	ZSDa015_Chr4_gene_174130_mRNA	Chr4	RLK	1	EGF#EGF_CA	WAK	2e-106
ZSDa015	ZSDa015_Chr15_gene_163410_mRNA	Chr15	RLK	1	LRRNT_2#LRR_8	LRR-III	4.4e-76
ZSDa015	ZSDa015_Chr18_gene_273250_mRNA	Chr18	RLK	1	LRRNT_2#LRR_8#LRR_8#LRR_8#LRR_1#LRR_8#LRR_8#Island#LRR_1#LRR_8	LRR-Xb-1	1.1e-125
ZSDa015	ZSDa015_Chr14_gene_98450_mRNA	Chr14	RLK_WE	1	None	LRR-XI-2	2.6e-81
ZSDa015	ZSDa015_Chr14_gene_96040_mRNA	Chr14	RLK	1	LRR_8#LRR_1	LRR-III	1.3e-99
ZSDa015	ZSDa015_Chr4_gene_182410_mRNA	Chr4	RLK	1	LRR_1#LRR_8	LRR-Xa	7.1e-134
ZSDa015	ZSDa015_Chr18_gene_271710_mRNA	Chr18	RLK	1	Lectin_legB	L-LEC	5.3e-118
ZSDa015	ZSDa015_Chr5_gene_110220_mRNA	Chr5	RLK	1	GUB_WAK_bind	LRK10L-2	2.8e-128
ZSDa015	ZSDa015_Chr15_gene_165160_mRNA	Chr15	RLK	1	Lectin_legB	L-LEC	6.2e-121
ZSDa015	ZSDa015_Chr15_gene_170870_mRNA	Chr15	RLK	1	B_lectin#S_locus_glycop#PAN_2	DLSV	2.1e-100
ZSDa015	ZSDa015_Chr4_gene_174150_mRNA	Chr4	RLK	1	GUB_WAK_bind#EGF_CA	WAK	6e-107
ZSDa015	ZSDa015_Chr13_gene_252580_mRNA	Chr13	RLK	1	Lectin_legB	L-LEC	7.5e-117
ZSDa015	ZSDa015_Chr18_gene_272200_mRNA	Chr18	RLK	1	Malectin_like#LRRNT_2#LRR_4#LRR_8	LRR-I-1	5e-113
ZSDa015	ZSDa015_Chr9_gene_335890_mRNA	Chr9	RLK	1	GUB_WAK_bind#RANK_CRD_2	WAK_LRK10L-1	2.5e-121
ZSDa015	ZSDa015_Chr13_gene_259970_mRNA	Chr13	RLK	1	Lectin_legB	L-LEC	1.2e-114
ZSDa015	ZSDa015_Chr2_gene_5360_mRNA	Chr2	RLK	1	LRRNT_2#LRR_8#LRR_4#LRR_1#LRR_8#LRR_4#LRR_8#LRR_8#LRR_8#LRR_8#LRR_8	LRR-XI-1	5.5e-90
ZSDa015	ZSDa015_Chr7_gene_280190_mRNA	Chr7	RLK	1	Lectin_legB	L-LEC	8.4e-109
ZSDa015	ZSDa015_Chr17_gene_315660_mRNA	Chr17	RLK_WE	1	None	LRR-XIIIa	4.9e-128
ZSDa015	ZSDa015_Chr19_gene_144790_mRNA	Chr19	RLK_WE	1	None	RLCK-IXa	4.3e-112
ZSDa015	ZSDa015_Chr5_gene_123090_mRNA	Chr5	RLK	1	Malectin_like#LRR_4	LRR-I-1	3.5e-104
ZSDa015	ZSDa015_Chr15_gene_157060_mRNA	Chr15	RLK	1	LRRNT_2#LRR_8#LRR_8#LRR_4#LRR_8#LRR_4#LRR_8#LRR_4#LRR_8#LRR_8#LRR_1#LRR_8#LRR_8	LRR-XI-1	2.3e-98
ZSDa015	ZSDa015_Chr5_gene_124520_mRNA	Chr5	RLK_WE	1	None	PERK-1	2.2e-156
ZSDa015	ZSDa015_Chr17_gene_320200_mRNA	Chr17	RLK	1	LRRNT_2#LRR_8#LRR_8#LRR_4#LRR_1#LRR_4#LRR_8	LRR-XII-1	7.4e-85
ZSDa015	ZSDa015_Chr8_gene_23270_mRNA	Chr8	RLK	1	Lectin_legB	L-LEC	2.4e-118
ZSDa015	ZSDa015_Chr15_gene_162580_mRNA	Chr15	RLK	1	B_lectin#S_locus_glycop#PAN_2	DLSV	1.1e-122
ZSDa015	ZSDa015_Chr2_gene_13430_mRNA	Chr2	RLK	1	LRRNT_2#LRR_8#LRR_8#LRR_1#LRR_8#LRR_1#LRR_8#LRR_8#LRR_4#LRR_1#LRR_8	LRR-XI-1	9.7e-66
ZSDa015	ZSDa015_Chr7_gene_281430_mRNA	Chr7	RLK	1	LRRNT_2#LRR_8	LRR-VI-2	4.4e-109
ZSDa015	ZSDa015_Chr5_gene_108190_mRNA	Chr5	RLK	1	LysM	LysM	4.7e-99
ZSDa015	ZSDa015_Chr13_gene_260010_mRNA	Chr13	RLK	1	Lectin_legB	L-LEC	7.8e-117
ZSDa015	ZSDa015_Chr15_gene_170920_mRNA	Chr15	RLK	1	B_lectin#S_locus_glycop#PAN_2	DLSV	1.2e-121
ZSDa015	ZSDa015_Chr11_gene_311050_mRNA	Chr11	RLK	1	LRRNT_2#LRR_4	LRR-III	1.9e-85
ZSDa015	ZSDa015_Chr5_gene_120180_mRNA	Chr5	RLK	1	LRRNT_2#LRR_8#LRR_4#LRR_8#LRRNT_2#LRR_4	LRR-IX	7.6e-166
ZSDa015	ZSDa015_Chr2_gene_13410_mRNA	Chr2	RLK	1	LRRNT_2#LRR_8#LRR_4#LRR_4#LRR_8#LRR_8#LRR_1#LRR_8#LRR_8#LRR_8#LRR_8#LRR_8	LRR-XI-1	2e-88
ZSDa015	ZSDa015_Chr20_gene_208800_mRNA	Chr20	RLK	1	LRRNT_2#LRR_8#LRR_1#LRR_4	LRR-III	7.2e-106
ZSDa015	ZSDa015_Chr19_gene_134120_mRNA	Chr19	RLK	1	LRR_8#LRR_4#LRR_8#Malectin	DLSV	1.3e-69
ZSDa015	ZSDa015_Chr4_gene_175110_mRNA	Chr4	RLK	1	Lectin_legB	L-LEC	4.8e-117
ZSDa015	ZSDa015_Chr17_gene_328200_mRNA	Chr17	RLK	1	LRRNT_2#LRR_8#LRR_8#LRR_1#LRR_8#LRR_8#LRR_8#LRR_8#LRR_8	LRR-XII-1	6.2e-122
ZSDa015	ZSDa015_Chr20_gene_211220_mRNA	Chr20	RLK	1	LRR_8#LRR_8#LRR_8#Malectin	DLSV	6.3e-107
ZSDa015	ZSDa015_Chr2_gene_5010_mRNA	Chr2	RLK	1	LRR_4#LRR_8#LRR_4#LRR_8#LRR_8#LRR_1#LRR_4#LRR_4#LRR_8#LRR_1#LRR_8#LRR_8#LRR_8	LRR-XI-1	1.9e-80
ZSDa015	ZSDa015_Chr13_gene_259920_mRNA	Chr13	RLK	1	Lectin_legB	L-LEC	1.3e-120
ZSDa015	ZSDa015_Chr5_gene_124020_mRNA	Chr5	RLK	1	GUB_WAK_bind#WAK_assoc	WAK_LRK10L-1	7.3e-129
ZSDa015	ZSDa015_Chr10_gene_238950_mRNA	Chr10	RLK	1	LRR_1#LRR_8#LRR_1#LRR_8	LRR-VI-1	9.7e-103
ZSDa015	ZSDa015_Chr5_gene_110550_mRNA	Chr5	RLK	1	LRRNT_2#LRR_8#LRR_4	LRR-III	3.5e-102
ZSDa015	ZSDa015_Chr11_gene_306550_mRNA	Chr11	RLK	1	LRRNT_2#LRR_1#LRR_1#LRR_8#LRR_8#LRR_8#LRR_8#LRR_4#LRR_8#LRR_8#LRR_8#LRR_8	LRR-XI-1	3.5e-93
ZSDa015	ZSDa015_Chr5_gene_114360_mRNA	Chr5	RLK	1	LysM#LysM	LysM	1.9e-88
ZSDa015	ZSDa015_Chr15_gene_170880_mRNA	Chr15	RLK	1	B_lectin#S_locus_glycop#PAN_2	DLSV	1.4e-106
ZSDa015	ZSDa015_Chr20_gene_211240_mRNA	Chr20	RLK	1	LRR_8#LRR_1#LRR_4#LRR_4#Malectin	DLSV	3.7e-102
ZSDa015	ZSDa015_Chr15_gene_163810_mRNA	Chr15	RLK	1	B_lectin#S_locus_glycop#PAN_2	DLSV	6.4e-124
ZSDa015	ZSDa015_Chr13_gene_253000_mRNA	Chr13	RLK	1	Lectin_legB	L-LEC	4.1e-70
ZSDa015	ZSDa015_Chr20_gene_211140_mRNA	Chr20	RLK	1	LRR_8#LRR_8#LRR_8#Malectin	DLSV	1e-105
ZSDa015	ZSDa015_Chr16_gene_59440_mRNA	Chr16	RLK	1	GUB_WAK_bind	LRK10L-2	3.1e-104
ZSDa015	ZSDa015_Chr15_gene_163860_mRNA	Chr15	RLK	1	B_lectin#S_locus_glycop#PAN_2	DLSV	2.1e-127
ZSDa015	ZSDa015_Chr8_gene_51260_mRNA	Chr8	RLK_WE	1	None	RLCK-Os	3.3e-151
ZSDa015	ZSDa015_Chr7_gene_280460_mRNA	Chr7	RLK	1	GUB_WAK_bind#WAK#EGF#EGF_CA	WAK	6.1e-101
ZSDa015	ZSDa015_Chr9_gene_329510_mRNA	Chr9	RLK	1	Lectin_legB	L-LEC	1.5e-120
ZSDa015	ZSDa015_Chr19_gene_133290_mRNA	Chr19	RLK	1	LRRNT_2#LRR_1#LRR_8	LRR-V	6.6e-126
ZSDa015	ZSDa015_Chr13_gene_259880_mRNA	Chr13	RLK	1	Lectin_legB	L-LEC	2e-116
ZSDa015	ZSDa015_Chr5_gene_126010_mRNA	Chr5	RLK_WE	1	None	Extensin	1e-150
ZSDa015	ZSDa015_Chr19_gene_134140_mRNA	Chr19	RLK	1	LRR_4#LRR_4#LRR_8#LRR_1#Malectin	DLSV	6.5e-111
ZSDa015	ZSDa015_Chr9_gene_339190_mRNA	Chr9	RLK_WE	1	None	RLCK-IXa	5.2e-58
ZSDa015	ZSDa015_Chr14_gene_95510_mRNA	Chr14	RLK_WE	1	None	RLCK-IXa	2e-78
ZSDa015	ZSDa015_Chr20_gene_204870_mRNA	Chr20	RLK_WE	1	None	PERK-1	3.8e-151
ZSDa015	ZSDa015_Chr15_gene_164080_mRNA	Chr15	RLK	1	Stress-antifung#Stress-antifung	DLSV	8.2e-125
ZSDa015	ZSDa015_Chr13_gene_259910_mRNA	Chr13	RLK	1	Lectin_legB	L-LEC	1.8e-114
ZSDa015	ZSDa015_Chr18_gene_271700_mRNA	Chr18	RLK	1	Lectin_legB	L-LEC	1.1e-119
ZSDa015	ZSDa015_Chr19_gene_141020_mRNA	Chr19	RLK	1	LRRNT_2#LRR_8#LRR_8	LRR-II	2.1e-115
ZSDa015	ZSDa015_Chr8_gene_51180_mRNA	Chr8	RLK_WE	1	None	RLCK-Os	8.9e-146
ZSDa015	ZSDa015_Chr14_gene_96400_mRNA	Chr14	RLK	1	LRRNT_2#LRR_8#LRR_1#LRR_8#LRR_4#LRR_8#LRR_4#LRR_8#LRR_1#LRR_8#LRR_8#LRR_8	LRR-VII-3	9.2e-114
ZSDa015	ZSDa015_Chr12_gene_80200_mRNA	Chr12	RLK	1	B_lectin#S_locus_glycop#PAN_2	SD-2b	2.1e-94
ZSDa015	ZSDa015_Chr3_gene_34180_mRNA	Chr3	RLK	1	LRRNT_2#LRR_8#LRR_8#LRR_8#LRR_1#LRR_8#LRR_8	LRR-VII-2	1.1e-133
ZSDa015	ZSDa015_Chr15_gene_166900_mRNA	Chr15	RLK	1	B_lectin#S_locus_glycop#PAN_2	SD-2b	4.6e-119
ZSDa015	ZSDa015_Chr7_gene_291010_mRNA	Chr7	RLK	1	Lectin_legB	L-LEC	2.8e-107
ZSDa015	ZSDa015_Chr11_gene_305620_mRNA	Chr11	RLK	1	LRRNT_2#LRR_8	LRR-VI-2	6.6e-101
ZSDa015	ZSDa015_Chr12_gene_73960_mRNA	Chr12	RLK	1	Lectin_legB	L-LEC	2.1e-117
ZSDa015	ZSDa015_Chr15_gene_156150_mRNA	Chr15	RLK	1	Stress-antifung#Stress-antifung	DLSV	4.6e-121
ZSDa015	ZSDa015_Chr8_gene_57110_mRNA	Chr8	RLK_WE	1	None	PERK-1	4.6e-154
ZSDa015	ZSDa015_Chr7_gene_290950_mRNA	Chr7	RLK	1	RCC1_2#RCC1_2#RCC1_2#RCC1_2	CR4L	9.6e-115
ZSDa015	ZSDa015_Chr7_gene_291600_mRNA	Chr7	RLK	1	LRRNT_2#LRR_8#LRR_1#LRR_4	LRR-III	6.4e-115
ZSDa015	ZSDa015_Chr2_gene_5330_mRNA	Chr2	RLK	1	LRRNT_2#LRR_8#LRR_1#LRR_8#LRR_1#LRR_4#LRR_8#LRR_8#LRR_8	LRR-XI-1	4.3e-90
ZSDa015	ZSDa015_Chr19_gene_153380_mRNA	Chr19	RLK	1	LRRNT_2#LRR_1#LRR_8	LRR-II	9.7e-155
ZSDa015	ZSDa015_Chr9_gene_341630_mRNA	Chr9	RLK	1	LRR_8#LRR_1	LRR-III	2.9e-99
ZSDa015	ZSDa015_Chr2_gene_5170_mRNA	Chr2	RLK	1	LRRNT_2#LRR_8#LRR_4#LRR_4#LRR_8#LRR_1#LRR_8#LRR_8	LRR-XI-1	4e-87
ZSDa015	ZSDa015_Chr8_gene_25840_mRNA	Chr8	RLK_WE	1	None	DLSV	3.2e-108
ZSDa015	ZSDa015_Chr5_gene_117370_mRNA	Chr5	RLK	1	B_lectin#S_locus_glycop#PAN_1	SD-2b	1.1e-106
ZSDa015	ZSDa015_Chr4_gene_189470_mRNA	Chr4	RLK_WE	1	None	PERK-1	1e-148
ZSDa015	ZSDa015_Chr15_gene_155950_mRNA	Chr15	RLK	1	B_lectin#S_locus_glycop#PAN_2	SD-2b	2.5e-116
ZSDa015	ZSDa015_Chr8_gene_51190_mRNA	Chr8	RLK_WE	2	None	RLCK-Os	1.5e-116
ZSDa015	ZSDa015_Chr3_gene_46190_mRNA	Chr3	RLK	1	LRRNT_2#LRR_8#LRR_8#LRR_4#LRR_8#LRR_4#LRR_1#LRR_8#LRR_8#LRR_8	LRR-XI-1	7.3e-98
ZSDa015	ZSDa015_Chr15_gene_156170_mRNA	Chr15	RLK	1	Stress-antifung	DLSV	2.7e-106
ZSDa015	ZSDa015_Chr15_gene_170850_mRNA	Chr15	RLK	1	B_lectin#S_locus_glycop#PAN_2	DLSV	2.4e-121
ZSDa015	ZSDa015_Chr5_gene_128080_mRNA	Chr5	RLK	1	RCC1_2#RCC1_2#RCC1_2#RCC1_2	CR4L	9.3e-106
ZSDa015	ZSDa015_Chr14_gene_96950_mRNA	Chr14	RLK	1	GUB_WAK_bind	URK-3	6.5e-49
ZSDa015	ZSDa015_Chr4_gene_187200_mRNA	Chr4	RLK	1	LRRNT_2#LRR_4#LRR_4#LRR_8#LRR_4#LRR_8#LRR_8#LRR_1#Island#LRR_1#LRR_8	LRR-Xb-1	6.3e-123
ZSDa015	ZSDa015_Chr15_gene_161570_mRNA	Chr15	RLK	1	LRRNT_2#LRR_4#LRR_8#LRR_4#LRR_4#LRR_8	LRR-XI-1	5.2e-104
ZSDa015	ZSDa015_Chr17_gene_314790_mRNA	Chr17	RLK	1	GUB_WAK_bind#WAK_assoc	LRK10L-2	3.2e-124
ZSDa015	ZSDa015_Chr17_gene_318860_mRNA	Chr17	RLK	1	LRRNT_2#LRR_8#LRR_1#LRR_1#LRR_8#LRR_8#LRR_8#LRR_8#LRR_8#LRR_4#LRR_8	LRR-XII-1	1.1e-110
ZSDa015	ZSDa015_Chr5_gene_120530_mRNA	Chr5	RLK	1	LRRNT_2#LRR_4#LRR_8#LRR_1	LRR-V	5.3e-143
ZSDa015	ZSDa015_Chr7_gene_280450_mRNA	Chr7	RLK	1	GUB_WAK_bind#WAK#EGF_3#EGF_CA	WAK	1.1e-108
ZSDa015	ZSDa015_Chr18_gene_263620_mRNA	Chr18	RLK	1	LRRNT_2#LRR_8#LRR_1#LRR_8#LRR_4#LRR_4#LRR_8#LRR_4	LRR-XII-1	1.7e-77
ZSDa015	ZSDa015_Chr13_gene_260060_mRNA	Chr13	RLK	1	Lectin_legB	L-LEC	5.2e-117
ZSDa015	ZSDa015_Chr7_gene_298520_mRNA	Chr7	RLK	1	Stress-antifung#Stress-antifung	DLSV	2.2e-110
ZSDa015	ZSDa015_Chr9_gene_337140_mRNA	Chr9	RLK	1	LRRNT_2#LRR_8#LRR_8#LRR_1	LRR-III	1.3e-110
ZSDa015	ZSDa015_Chr2_gene_19180_mRNA	Chr2	RLK	1	LRRNT_2#LRR_8#LRR_4	LRR-III	4e-82
ZSDa015	ZSDa015_Chr8_gene_56710_mRNA	Chr8	RLK	1	Malectin_like	CrRLK1L-1	4.4e-149
ZSDa015	ZSDa015_Chr13_gene_259990_mRNA	Chr13	RLK	1	Lectin_legB	L-LEC	3e-116
ZSDa015	ZSDa015_Chr4_gene_188840_mRNA	Chr4	RLK	1	Stress-antifung#Stress-antifung#Stress-antifung#Stress-antifung	DLSV	4.3e-119
ZSDa015	ZSDa015_Chr19_gene_137860_mRNA	Chr19	RLK	1	LysM	LysM	2.1e-81
ZSDa015	ZSDa015_Chr4_gene_188580_mRNA	Chr4	RLK	1	LysM	LysM	3.9e-95
ZSDa015	ZSDa015_Chr16_gene_59490_mRNA	Chr16	RLK	1	GUB_WAK_bind#DUF2963	LRK10L-2	1.1e-130
ZSDa015	ZSDa015_Chr5_gene_115830_mRNA	Chr5	RLK	1	LRRNT_2#LRR_4#LRR_8#LRR_1#LRR_4	LRR-VIII-1	1.5e-129
ZSDa015	ZSDa015_Chr16_gene_70640_mRNA	Chr16	RLK_WE	1	None	RLCK-IV	1.4e-127
ZSDa015	ZSDa015_Chr4_gene_188390_mRNA	Chr4	RLK	1	Stress-antifung#Stress-antifung	DLSV	4.8e-109
ZSDa015	ZSDa015_Chr2_gene_5020_mRNA	Chr2	RLK	1	LRRNT_2#LRR_8#LRR_8#LRR_4#LRR_8#LRR_8#LRR_1#LRR_8#LRR_8#LRR_4#LRR_8	LRR-XI-1	6.6e-90
ZSDa015	ZSDa015_Chr19_gene_138600_mRNA	Chr19	RLK	1	LRRNT_2#LRR_8#LRR_8#LRR_8#LRR_8#LRR_8	LRR-Xb-1	4e-127
ZSDa015	ZSDa015_Chr3_gene_47120_mRNA	Chr3	RLK	1	Lectin_legB	L-LEC	3.5e-104
ZSDa015	ZSDa015_Chr19_gene_137980_mRNA	Chr19	RLK	1	Malectin_like	CrRLK1L-1	2.7e-125
ZSDa015	ZSDa015_Chr15_gene_156130_mRNA	Chr15	RLK	1	Stress-antifung#Stress-antifung	DLSV	1e-125
ZSDa015	ZSDa015_Chr4_gene_175870_mRNA	Chr4	RLK	1	LRRNT_2#LRR_8#LRR_4#LRR_8#LRR_1#LRR_8#LRR_8#LRR_8#LRR_8#LRR_8	LRR-XI-1	7.3e-97
ZSDa015	ZSDa015_Chr20_gene_211130_mRNA	Chr20	RLK	1	LRR_8#LRR_4#LRR_1#Malectin	DLSV	1.4e-110
ZSDa015	ZSDa015_Chr15_gene_156160_mRNA	Chr15	RLK	1	Stress-antifung#Stress-antifung	DLSV	9.8e-75
ZSDa015	ZSDa015_Chr12_gene_75280_mRNA	Chr12	RLK	1	LRR_8#LRR_8#LRR_8#LRR_4#LRR_8	LRR-XI-1	1.4e-85
ZSDa015	ZSDa015_Chr8_gene_48230_mRNA	Chr8	RLK	1	B_lectin#S_locus_glycop#PAN_2	DLSV	1.1e-121
ZSDa015	ZSDa015_Chr20_gene_213700_mRNA	Chr20	RLK_WE	1	None	RLCK-IXa	2e-49
ZSDa015	ZSDa015_Chr8_gene_48540_mRNA	Chr8	RLK	1	Stress-antifung#Stress-antifung	DLSV	1.6e-119
ZSDa015	ZSDa015_Chr5_gene_118700_mRNA	Chr5	RLK	1	B_lectin#PAN_2	SD-2b	3e-104
ZSDa015	ZSDa015_Chr15_gene_163740_mRNA	Chr15	RLK	1	B_lectin#S_locus_glycop#PAN_2	SD-2b	1.4e-123
ZSDa015	ZSDa015_Chr13_gene_259890_mRNA	Chr13	RLK	1	Lectin_legB	L-LEC	4.5e-112
ZSDa015	ZSDa015_Chr2_gene_5120_mRNA	Chr2	RLK	1	LRRNT_2#LRR_8#LRR_8#LRR_8#LRR_8#LRR_1#LRR_8#LRR_4#LRR_1#LRR_8#LRR_8#LRR_8	LRR-XI-1	8.4e-90
ZSDa015	ZSDa015_Chr2_gene_11660_mRNA	Chr2	RLK_WE	1	None	RLCK-V	2e-148
ZSDa015	ZSDa015_Chr5_gene_119670_mRNA	Chr5	RLK	1	LRRNT_2#LRR_1#LRR_8	LRR-II	1.7e-156
ZSDa015	ZSDa015_Chr13_gene_259670_mRNA	Chr13	RLK_WE	1	None	LysM	1.6e-66
ZSDa015	ZSDa015_Chr8_gene_57200_mRNA	Chr8	RLK	1	Lectin_legB	L-LEC	1.5e-116
ZSDa015	ZSDa015_Chr8_gene_31620_mRNA	Chr8	RLK	1	LRR_4#LRR_8#LRR_1#LRR_8#LRR_4#LRR_8#LRR_8#LRR_1	LRR-XI-1	2.4e-109
ZSDa015	ZSDa015_Chr14_gene_95000_mRNA	Chr14	RLK_WE	1	None	Extensin	1.7e-146
ZSDa015	ZSDa015_Chr15_gene_170840_mRNA	Chr15	RLK	1	B_lectin#S_locus_glycop#PAN_2	DLSV	4.7e-118
ZSDa015	ZSDa015_Chr7_gene_280900_mRNA	Chr7	RLK	1	Malectin_like	CrRLK1L-1	5.5e-149
ZSDa015	ZSDa015_Chr11_gene_312380_mRNA	Chr11	RLK	1	Stress-antifung#Stress-antifung	DLSV	1.1e-123
ZSDa015	ZSDa015_Chr2_gene_5320_mRNA	Chr2	RLK	1	LRRNT_2#LRR_8#LRR_4#LRR_4#LRR_8#LRR_8#LRR_8#LRR_8	LRR-XI-1	1.5e-89
ZSDa015	ZSDa015_Chr8_gene_51300_mRNA	Chr8	RLK_WE	1	None	RLCK-Os	6.8e-131
ZSDa015	ZSDa015_Chr3_gene_33810_mRNA	Chr3	RLK	1	LRRNT_2#LRR_4#LRR_8#LRR_8#LRR_8#LRR_8#LRR_8#LRR_8	LRR-XI-1	6.2e-98
ZSDa015	ZSDa015_Chr19_gene_138010_mRNA	Chr19	RLK	1	Malectin_like	CrRLK1L-1	2.3e-125
ZSDa015	ZSDa015_Chr2_gene_14720_mRNA	Chr2	RLK	1	LRRNT_2#LRR_8	LRR-VI-2	2.9e-95
ZSDa015	ZSDa015_Chr8_gene_50870_mRNA	Chr8	RLK	1	LRRNT_2#LRR_1#LRR_8	LRR-II	1.1e-134
ZSDa015	ZSDa015_Chr8_gene_31640_mRNA	Chr8	RLK	1	Lectin_legB	L-LEC	1.8e-117
ZSDa015	ZSDa015_Chr17_gene_324600_mRNA	Chr17	RLK	1	Lectin_legB	L-LEC	5.9e-114
ZSDa015	ZSDa015_Chr20_gene_208320_mRNA	Chr20	RLK	1	LRRNT_2#LRR_8#LRR_8	LRR-III	1.4e-57
ZSDa015	ZSDa015_Chr15_gene_170980_mRNA	Chr15	RLK	1	B_lectin#S_locus_glycop#PAN_2	DLSV	6.2e-122
ZSDa015	ZSDa015_Chr4_gene_191550_mRNA	Chr4	RLK	1	LRRNT_2#LRR_8#LRR_8#LRR_8#LRRNT_2#LRR_8	LRR-IX	4.5e-151
ZSDa015	ZSDa015_Chr4_gene_192790_mRNA	Chr4	RLK	1	LRRNT_2#LRR_8#LRR_8#LRR_8#LRR_8#LRR_1#LRR_1#LRR_8#LRR_1#LRR_1#LRR_4	LRR-XI-1	1.7e-101
ZSDa015	ZSDa015_Chr18_gene_270510_mRNA	Chr18	RLK	1	LRRNT_2#LRR_1#LRR_8#LRR_8#LRR_8#LRR_8#LRR_8#LRR_1	LRR-XII-1	2.2e-110
ZSDa015	ZSDa015_Chr12_gene_75720_mRNA	Chr12	RLK	1	LRRNT_2#LRR_8#LRR_8#LRR_8#LRR_8	LRR-VIII-1	2.7e-131
ZSDa015	ZSDa015_Chr2_gene_12220_mRNA	Chr2	RLK	1	GUB_WAK_bind#EGF_3	WAK_LRK10L-1	3.2e-125
ZSDa015	ZSDa015_Chr13_gene_258680_mRNA	Chr13	RLK	1	LRRNT_2#LRR_8#LRR_4#LRR_8#LRR_8#LRR_4#LRR_8#LRR_4#LRR_8#LRR_8	LRR-XII-1	9.7e-82
ZSDa015	ZSDa015_Chr14_gene_104020_mRNA	Chr14	RLK	1	LRR_8#LRR_8#LRR_8#LRR_4#LRR_8#LRR_8#LRR_8#LRR_8	LRR-XI-1	3.7e-106
ZSDa015	ZSDa015_Chr3_gene_43830_mRNA	Chr3	RLK_WE	1	None	RLCK-IXa	2e-88
ZSDa015	ZSDa015_Chr16_gene_66880_mRNA	Chr16	RLK_WE	1	None	LRR-III	7e-78
ZSDa015	ZSDa015_Chr2_gene_16500_mRNA	Chr2	RLK	1	LysM#LysM	LysM	1e-54
ZSDa015	ZSDa015_Chr5_gene_130320_mRNA	Chr5	RLK	1	LRRNT_2#LRR_8#LRR_1	LRR-Xa	1.6e-118
ZSDa015	ZSDa015_Chr5_gene_105840_mRNA	Chr5	RLK	1	LRRNT_2#LRR_4	LRR-III	9.8e-75
ZSDa015	ZSDa015_Chr2_gene_12850_mRNA	Chr2	RLK	1	LRRNT_2#LRR_1	LRR-XI-1	3.8e-77
ZSDa015	ZSDa015_Chr5_gene_117380_mRNA	Chr5	RLK	1	B_lectin#S_locus_glycop#PAN_1	SD-2b	1.3e-108
ZSDa015	ZSDa015_Chr17_gene_315340_mRNA	Chr17	RLK_WE	1	None	WAK_LRK10L-1	1e-125
ZSDa015	ZSDa015_Chr8_gene_55380_mRNA	Chr8	RLK	1	Malectin_like	CrRLK1L-1	1.6e-148
ZSDa015	ZSDa015_Chr2_gene_5210_mRNA	Chr2	RLK	1	LRRNT_2#LRR_8#LRR_4#LRR_1#LRR_8#LRR_4#LRR_8#LRR_1#LRR_8#LRR_4#LRR_1#LRR_8	LRR-XI-1	1e-89
ZSDa015	ZSDa015_Chr7_gene_296750_mRNA	Chr7	RLK	1	Stress-antifung#Stress-antifung	DLSV	2.4e-123
ZSDa015	ZSDa015_Chr9_gene_329910_mRNA	Chr9	RLK	1	Malectin_like	CrRLK1L-1	9e-148
ZSDa015	ZSDa015_Chr7_gene_286960_mRNA	Chr7	RLK	1	Stress-antifung	DLSV	8.8e-126
ZSDa015	ZSDa015_Chr19_gene_138510_mRNA	Chr19	RLK	1	Stress-antifung#Stress-antifung	DLSV	8.1e-107
ZSDa015	ZSDa015_Chr5_gene_123350_mRNA	Chr5	RLK	1	LRR_8#LRR_8#LRR_8#LRR_1#LRR_8#LRR_8#LRR_1#LRR_8	LRR-XII-1	1.9e-116
ZSDa015	ZSDa015_Chr8_gene_51280_mRNA	Chr8	RLK_WE	1	None	RLCK-Os	4.1e-126
ZSDa015	ZSDa015_Chr15_gene_165000_mRNA	Chr15	RLK	1	B_lectin#S_locus_glycop#PAN_2	DLSV	3.3e-126
ZSDa015	ZSDa015_Chr15_gene_170810_mRNA	Chr15	RLK	1	B_lectin#S_locus_glycop#PAN_2	DLSV	1.7e-122
ZSDa015	ZSDa015_Chr4_gene_188550_mRNA	Chr4	RLK	1	GUB_WAK_bind#WAK_assoc	WAK_LRK10L-1	1.6e-128
ZSDa015	ZSDa015_Chr5_gene_117360_mRNA	Chr5	RLK	1	B_lectin#S_locus_glycop#PAN_2	SD-2b	7.8e-109
ZSDa015	ZSDa015_Chr8_gene_48480_mRNA	Chr8	RLK	1	Stress-antifung#Stress-antifung	DLSV	4e-123
ZSDa015	ZSDa015_Chr13_gene_259850_mRNA	Chr13	RLK	1	Lectin_legB	L-LEC	1.5e-110
ZSDa015	ZSDa015_Chr8_gene_48490_mRNA	Chr8	RLK	1	Stress-antifung#Stress-antifung	DLSV	1.2e-123
ZSDa015	ZSDa015_Chr17_gene_320060_mRNA	Chr17	RLK	1	LRRNT_2#LRR_8#LRR_4#LRR_8#LRR_8#LRR_8#LRR_8#LRR_8#LRR_8#LRR_1#LRR_8	LRR-XII-1	1.5e-119
ZSDa015	ZSDa015_Chr15_gene_163710_mRNA	Chr15	RLK	1	B_lectin#S_locus_glycop#PAN_2	SD-2b	5.8e-120
ZSDa015	ZSDa015_Chr18_gene_274260_mRNA	Chr18	RLK	1	LRRNT_2#LRR_8#LRR_4	LRR-II	1.3e-148
ZSDa015	ZSDa015_Chr8_gene_26180_mRNA	Chr8	RLK	1	LRR_4#LRR_8#LRR_1	LRR-III	3.4e-92
ZSDa015	ZSDa015_Chr9_gene_335840_mRNA	Chr9	RLK	1	lci#B_lectin#S_locus_glycop#PAN_4	SD-2b	8.7e-112
ZSDa015	ZSDa015_Chr5_gene_108050_mRNA	Chr5	RLK	1	Lectin_C	C-LEC	6.1e-140
ZSDa015	ZSDa015_Chr19_gene_155100_mRNA	Chr19	RLK	1	LRR_8#LRR_8#LRR_8#Malectin	DLSV	4e-38
ZSDa015	ZSDa015_Chr16_gene_62510_mRNA	Chr16	RLK	1	LRRNT_2#LRR_8#LRR_8#LRR_8#LRR_8#LRR_8#LRR_1#LRR_8	LRR-XII-1	2.3e-102
ZSDa015	ZSDa015_Chr13_gene_259940_mRNA	Chr13	RLK	1	Lectin_legB	L-LEC	3.9e-117
ZSDa015	ZSDa015_Chr20_gene_205840_mRNA	Chr20	RLK	1	LysM	LysM	8.1e-104
ZSDa015	ZSDa015_Chr15_gene_170730_mRNA	Chr15	RLK	1	B_lectin#S_locus_glycop#PAN_2	DLSV	1.1e-120
ZSDa015	ZSDa015_Chr5_gene_105290_mRNA	Chr5	RLK	1	LRR_1#LRR_4#LRR_4#LRR_1	LRR-V	5.2e-102
ZSDa015	ZSDa015_Chr9_gene_338570_mRNA	Chr9	RLK_WE	1	None	LRR-I-2	1e-122
ZSDa015	ZSDa015_Chr5_gene_111930_mRNA	Chr5	RLK	1	LRRNT_2#LRR_8#LRR_8#LRR_8#LRR_8#LRR_1#LRR_8#LRR_1#LRR_8	LRR-XI-1	2.7e-113
ZSDa015	ZSDa015_Chr8_gene_48500_mRNA	Chr8	RLK	1	Stress-antifung#Stress-antifung	DLSV	1.1e-123
ZSDa015	ZSDa015_Chr2_gene_5340_mRNA	Chr2	RLK	1	LRRNT_2#LRR_8#LRR_4#LRR_1#LRR_8#LRR_8#LRR_8#LRR_8#LRR_1#LRR_8	LRR-XI-1	2.5e-90
ZSDa015	ZSDa015_Chr8_gene_26960_mRNA	Chr8	RLK	1	LRRNT_2#LRR_1#LRR_8	LRR-III	1.6e-82
ZSDa015	ZSDa015_Chr2_gene_5030_mRNA	Chr2	RLK	1	LRRNT_2#LRR_8#LRR_4#LRR_4#LRR_8#LRR_8#LRR_8#LRR_8#LRR_1#LRR_8	LRR-XI-1	2.6e-86
ZSDa015	ZSDa015_Chr17_gene_320770_mRNA	Chr17	RLK	2	Kinase#LRRNT_2#LRR_8#LRR_8#LRR_8#LRR_8#LRR_8#LRR_8	LRR-XII-1	1.3e-221
ZSDa015	ZSDa015_Chr16_gene_72260_mRNA	Chr16	RLK	1	Lectin_legB	L-LEC	1.9e-107
ZSDa015	ZSDa015_Chr8_gene_26930_mRNA	Chr8	RLK	1	LRRNT_2#LRR_8#LRR_1	LRR-III	2.3e-76
ZSDa015	ZSDa015_Chr5_gene_105480_mRNA	Chr5	RLK	1	LRRNT_2#LRR_8#LRR_4#LRR_1#LRR_4#LRR_8#LRR_8#LRR_8#LRR_1#Island#LRR_8	LRR-Xb-1	6.2e-129
ZSDa015	ZSDa015_Chr12_gene_75020_mRNA	Chr12	RLK	1	RCC1_2#RCC1_2#RCC1_2#RCC1_2	CR4L	2.9e-111
ZSDa015	ZSDa015_Chr8_gene_48530_mRNA	Chr8	RLK	1	Stress-antifung#Stress-antifung	DLSV	3e-107
ZSDa015	ZSDa015_Chr14_gene_87310_mRNA	Chr14	RLK	1	LRRNT_2#LRR_8#LRR_8#LRR_8#LRR_8#LRR_1	LRR-VII-1	1.1e-124
ZSDa015	ZSDa015_Chr2_gene_19660_mRNA	Chr2	RLK	1	LRRNT_2#LRR_8#LRR_4#LRR_8#LRR_1#LRR_8#LRR_8#LRR_8#LRR_8#LRR_8	LRR-XI-1	4.7e-118
ZSDa015	ZSDa015_Chr19_gene_136720_mRNA	Chr19	RLK_WE	1	None	LysM	1.3e-97
ZSDa015	ZSDa015_Chr15_gene_162530_mRNA	Chr15	RLK	1	B_lectin#S_locus_glycop#PAN_2	DLSV	1.7e-122
ZSDa015	ZSDa015_Chr2_gene_4980_mRNA	Chr2	RLK	1	LRRNT_2#LRR_8#LRR_4#LRR_8#LRR_8#LRR_8#LRR_4#LRR_1#LRR_8	LRR-XI-1	7.2e-90
ZSDa015	ZSDa015_Chr12_gene_85890_mRNA	Chr12	RLK_WE	1	None	RLCK-V	9.2e-158
ZSDa015	ZSDa015_Chr17_gene_326080_mRNA	Chr17	RLK	1	B_lectin#S_locus_glycop#PAN_4	SD-2b	1.5e-105
ZSDa015	ZSDa015_Chr15_gene_170940_mRNA	Chr15	RLK	1	B_lectin#S_locus_glycop#PAN_2	DLSV	5.8e-122
ZSDa015	ZSDa015_Chr5_gene_105270_mRNA	Chr5	RLK	1	B_lectin	SD-2b	1.7e-104
ZSDa015	ZSDa015_Chr14_gene_97090_mRNA	Chr14	RLK_WE	1	None	RLCK-V	4e-158
ZSDa015	ZSDa015_Chr15_gene_162500_mRNA	Chr15	RLK	1	B_lectin#S_locus_glycop#PAN_2	DLSV	4.3e-104
ZSDa015	ZSDa015_Chr5_gene_110670_mRNA	Chr5	RLK	1	LRRNT_2#LRR_8#LRR_8#LRR_8	LRR-III	3.3e-94
ZSDa015	ZSDa015_Chr5_gene_118570_mRNA	Chr5	RLK	1	GUB_WAK_bind#WAK#EGF_CA	WAK	3.4e-111
ZSDa015	ZSDa015_Chr17_gene_327260_mRNA	Chr17	RLK	1	LRRNT_2#LRR_4#LRR_8#LRR_8#LRR_4#LRR_4#LRR_8#LRR_4#LRR_8	LRR-XII-1	6.8e-117
ZSDa015	ZSDa015_Chr15_gene_170740_mRNA	Chr15	RLK	1	B_lectin#S_locus_glycop#PAN_2	DLSV	3.7e-120
ZSDa015	ZSDa015_Chr19_gene_137930_mRNA	Chr19	RLK	1	Malectin_like	CrRLK1L-1	2.4e-136
ZSDa015	ZSDa015_Chr19_gene_149830_mRNA	Chr19	RLK	1	Malectin_like	CrRLK1L-1	9e-125
ZSDa015	ZSDa015_Chr19_gene_146530_mRNA	Chr19	RLK	1	LRRNT_2#LRR_1#LRR_8#LRR_1#LRR_8#LRR_8#LRR_8#LRR_4#LRR_8#LRR_8#LRR_8#LRR_4	LRR-XII-1	2.1e-80
ZSDa015	ZSDa015_Chr17_gene_314820_mRNA	Chr17	RLK	1	GUB_WAK_bind#WAK_assoc	LRK10L-2	9.9e-137
ZSDa015	ZSDa015_Chr3_gene_34100_mRNA	Chr3	RLK	1	LRRNT_2#LRR_8#LRR_4#LRR_8#LRR_1#LRR_4#LRR_1#LRR_1#LRR_1#LRR_8	LRR-XII-1	1.9e-105
ZSDa015	ZSDa015_Chr15_gene_170720_mRNA	Chr15	RLK	1	B_lectin#S_locus_glycop#PAN_2	DLSV	3.2e-124
ZSDa015	ZSDa015_Chr8_gene_57190_mRNA	Chr8	RLK	1	Lectin_legB	L-LEC	3.8e-119
ZSDa015	ZSDa015_Chr5_gene_128910_mRNA	Chr5	RLK	1	RCC1_2#RCC1_2#RCC1_2#RCC1_2#RCC1_2#TNFR_c6	CR4L	2.9e-108
ZSDa015	ZSDa015_Chr4_gene_186970_mRNA	Chr4	RLK_WE	1	None	SD-2b	6.2e-105
ZSDa015	ZSDa015_Chr15_gene_160890_mRNA	Chr15	RLK	1	B_lectin#S_locus_glycop#PAN_2	DLSV	2.1e-122
ZSDa015	ZSDa015_Chr14_gene_88320_mRNA	Chr14	RLK_WE	1	None	RLCK-XIII	1.6e-115
ZSDa015	ZSDa015_Chr5_gene_117390_mRNA	Chr5	RLK	1	B_lectin#S_locus_glycop#PAN_1	SD-2b	6.1e-109
ZSDa015	ZSDa015_Chr15_gene_163780_mRNA	Chr15	RLK	1	B_lectin#S_locus_glycop#PAN_2	DLSV	2.3e-122
ZSDa015	ZSDa015_Chr7_gene_296740_mRNA	Chr7	RLK	1	Stress-antifung	DLSV	2.6e-107
ZSDa015	ZSDa015_Chr15_gene_157890_mRNA	Chr15	RLK	1	LRRNT_2#LRR_8#LRR_8#LRR_8#LRR_4#LRR_4	LRR-XI-1	3.7e-85
ZSDa015	ZSDa015_Chr17_gene_323250_mRNA	Chr17	RLK	1	LRRNT_2#LRR_1#LRR_8#LRR_1	LRR-III	2.4e-95
ZSDa015	ZSDa015_Chr9_gene_336250_mRNA	Chr9	RLK	1	Malectin_like	CrRLK1L-1	2.1e-146
ZSDa015	ZSDa015_Chr16_gene_65410_mRNA	Chr16	RLK	1	LRRNT_2#LRR_4#LRR_4#LRR_1#LRR_4#LRR_8#LRR_4#LRR_8#LRR_8#LRR_1#Island#LRR_8	LRR-Xb-1	6.3e-128
ZSDa015	ZSDa015_Chr8_gene_48190_mRNA	Chr8	RLK	1	S_locus_glycop#PAN_2	SD-2b	1.7e-122
ZSDa015	ZSDa015_Chr2_gene_5420_mRNA	Chr2	RLK	1	LRRNT_2#LRR_8#LRR_8#LRR_4#LRR_4#LRR_4#LRR_8#LRR_4#LRR_1#LRR_8#LRR_4#LRR_8	LRR-XI-1	6.6e-91
ZSDa015	ZSDa015_Chr9_gene_332210_mRNA	Chr9	RLK	1	LRRNT_2#LRR_8#LRR_8#LRR_8#LRR_8#LRR_1#LRR_8#LRR_1#LRR_8#LRR_1#LRR_8	LRR-XI-1	6.4e-94
ZSDa015	ZSDa015_Chr8_gene_47930_mRNA	Chr8	RLK	1	LRRNT_2#LRR_1#LRR_8#LRR_4	LRR-V	2.6e-116
ZSDa015	ZSDa015_Chr9_gene_330250_mRNA	Chr9	RLK	1	LRRNT_2#LRR_8#LRR_8#LRR_8#LRR_8	LRR-III	5.6e-93
ZSDa015	ZSDa015_Chr2_gene_5220_mRNA	Chr2	RLK	1	LRR_8#LRR_8#LRR_8#LRR_1#LRR_4#LRR_4#LRR_8#LRR_1#LRR_4#LRR_8#LRR_4#LRR_1#LRR_8#LRR_8#LRR_8	LRR-XI-1	6.9e-90
ZSDa015	ZSDa015_Chr18_gene_278030_mRNA	Chr18	RLK	1	Lectin_legB	L-LEC	2.5e-119
ZSDa015	ZSDa015_Chr20_gene_210660_mRNA	Chr20	RLK	1	B_lectin#S_locus_glycop	SD-2b	7.1e-117
ZSDa015	ZSDa015_Chr20_gene_211150_mRNA	Chr20	RLK	1	LRR_8#LRR_1#LRR_4#LRR_8#Malectin	DLSV	2e-35
ZSDa015	ZSDa015_Chr5_gene_117040_mRNA	Chr5	RLK_WE	1	None	LRR-Xb-1	1.8e-101
ZSDa015	ZSDa015_Chr10_gene_239460_mRNA	Chr10	RLK	2	LRR_8#LRR_8	LRR-VIII-1	9.8e-254
ZSDa015	ZSDa015_Chr8_gene_48160_mRNA	Chr8	RLK	1	B_lectin#S_locus_glycop#PAN_2	SD-2b	1.3e-119
ZSDa015	ZSDa015_Chr15_gene_163730_mRNA	Chr15	RLK	1	B_lectin#S_locus_glycop#PAN_2	SD-2b	2.2e-123
ZSDa015	ZSDa015_Chr17_gene_320780_mRNA	Chr17	RLK	1	LRRNT_2#LRR_8#LRR_8#LRR_8#LRR_8#LRR_8#LRR_8#LRR_1#LRR_8	LRR-XII-1	1.1e-113
ZSDa015	ZSDa015_Chr2_gene_8960_mRNA	Chr2	RLK	1	LRRNT_2#LRR_8#LRR_4#LRR_4#LRR_8#LRR_8#LRR_8#LRR_8#LRR_8#LRR_8	LRR-XI-1	4.2e-88
ZSDa015	ZSDa015_Chr20_gene_203860_mRNA	Chr20	RLK_WE	1	None	Extensin	4.8e-137
ZSDa015	ZSDa015_Chr18_gene_266880_mRNA	Chr18	RLK	1	LRRNT_2#LRR_8#LRR_4	LRR-III	3.4e-114
ZSDa015	ZSDa015_Chr19_gene_135360_mRNA	Chr19	RLK	1	LRRNT_2#LRR_8#LRR_4#LRR_1	LRR-III	2.4e-115
ZSDa015	ZSDa015_Chr16_gene_63740_mRNA	Chr16	RLK_WE	1	None	RLCK-X	7e-155
ZSDa015	ZSDa015_Chr13_gene_259870_mRNA	Chr13	RLK	1	Lectin_legB	L-LEC	2.3e-112
ZSDa015	ZSDa015_Chr5_gene_110600_mRNA	Chr5	RLK	1	GUB_WAK_bind#WAK_assoc	LRK10L-2	7.1e-130
ZSDa015	ZSDa015_Chr7_gene_280210_mRNA	Chr7	RLK	1	B_lectin#S_locus_glycop#PAN_2	SD-2b	1.1e-104
ZSDa015	ZSDa015_Chr8_gene_48220_mRNA	Chr8	RLK	1	B_lectin#S_locus_glycop#PAN_2	DLSV	2e-127
ZSDa015	ZSDa015_Chr5_gene_105970_mRNA	Chr5	RLK	1	B_lectin#S_locus_glycop#PAN_2	DLSV	2.6e-128
ZSDa015	ZSDa015_Chr10_gene_245480_mRNA	Chr10	RLK	1	B_lectin#S_locus_glycop#PAN_2	SD-2b	8.6e-120
ZSDa015	ZSDa015_Chr7_gene_289670_mRNA	Chr7	RLK	1	B_lectin#S_locus_glycop#PAN_2	SD-2b	1e-102
ZSDa015	ZSDa015_Chr8_gene_48170_mRNA	Chr8	RLK	1	B_lectin#S_locus_glycop#PAN_2	SD-2b	3.3e-120
ZSDa015	ZSDa015_Chr8_gene_57180_mRNA	Chr8	RLK	1	Lectin_legB#Lectin_legB	L-LEC	1.1e-118
ZSDa015	ZSDa015_Chr14_gene_99000_mRNA	Chr14	RLK	1	LRRNT_2#LRR_4#LRR_8	LRR-Xa	2e-136
ZSDa015	ZSDa015_Chr7_gene_282130_mRNA	Chr7	RLK	1	Malectin_like	CrRLK1L-1	2e-153
ZSDa015	ZSDa015_Chr13_gene_260000_mRNA	Chr13	RLK	1	Lectin_legB	L-LEC	1.9e-116
ZSDa015	ZSDa015_Chr19_gene_146520_mRNA	Chr19	RLK	1	LRRNT_2#LRR_1#LRR_8#LRR_1#LRR_8#LRR_8#LRR_8#LRR_4#LRR_8#LRR_8#LRR_8#LRR_4	LRR-XII-1	1.9e-78
ZSDa015	ZSDa015_Chr12_gene_75440_mRNA	Chr12	RLK	1	LRRNT_2#LRR_1#LRR_8#LRR_1	LRR-III	1.7e-117
ZSDa015	ZSDa015_Chr19_gene_131890_mRNA	Chr19	RLK_WE	1	None	RLCK-V	1.3e-154
ZSDa015	ZSDa015_Chr6_gene_202260_mRNA	Chr6	RLK_WE	1	None	RLCK-V	5.9e-156
ZSDa015	ZSDa015_Chr12_gene_81870_mRNA	Chr12	RLK	1	LRR_4#LRR_8#LRR_1#LRR_8	LRR-VIII-1	3.9e-114
ZSDa015	ZSDa015_Chr15_gene_164100_mRNA	Chr15	RLK	1	Stress-antifung#Stress-antifung	DLSV	3e-124
ZSDa015	ZSDa015_Chr17_gene_320190_mRNA	Chr17	RLK	1	LRRNT_2#LRR_4#LRR_1#LRR_8#LRR_8#LRR_8#LRR_8#LRR_8#LRR_1#LRR_8	LRR-XII-1	1e-119
ZSDa015	ZSDa015_Chr15_gene_155580_mRNA	Chr15	RLK	1	Malectin_like	CrRLK1L-1	2.5e-153
ZSDa015	ZSDa015_Chr17_gene_322020_mRNA	Chr17	RLK_WE	1	None	PERK-1	2.6e-152
ZSDa015	ZSDa015_Chr1_gene_215800_mRNA	Chr1	RLK	1	GUB_WAK_bind	LRK10L-2	1.9e-130
ZSDa015	ZSDa015_Chr13_gene_259960_mRNA	Chr13	RLK	1	Lectin_legB	L-LEC	1.4e-117
ZSDa015	ZSDa015_Chr2_gene_5240_mRNA	Chr2	RLK	1	LRRNT_2#LRR_8#LRR_4#LRR_4#LRR_8#LRR_4#LRR_8#LRR_1#LRR_8	LRR-XI-1	4.2e-87
ZSDa015	ZSDa015_Chr14_gene_93240_mRNA	Chr14	RLK	1	B_lectin#PAN_2	SD-2b	6.1e-108
ZSDa015	ZSDa015_Chr5_gene_107580_mRNA	Chr5	RLK	1	LRRNT_2#LRR_1#LRR_8#LRR_4#LRR_4#LRR_8#LRR_8#LRR_8#LRR_1	LRR-III	5.2e-76
ZSDa015	ZSDa015_Chr2_gene_5430_mRNA	Chr2	RLK	1	LRRNT_2#LRR_8#LRR_8#LRR_1#LRR_8#LRR_1#LRR_4#LRR_4#LRR_4#LRR_1#LRR_8#LRR_1#LRR_1#LRR_8	LRR-XI-1	2.9e-89
ZSDa015	ZSDa015_Chr20_gene_211120_mRNA	Chr20	RLK	1	LRR_8#LRR_8#LRR_4#Malectin	DLSV	1.2e-111
ZSDa015	ZSDa015_Chr15_gene_162780_mRNA	Chr15	RLK	1	Malectin_like	CrRLK1L-1	1.5e-150
ZSDa015	ZSDa015_Chr16_gene_59530_mRNA	Chr16	RLK	1	GUB_WAK_bind	LRK10L-2	2.6e-114
ZSDa015	ZSDa015_Chr15_gene_155920_mRNA	Chr15	RLK	1	B_lectin#S_locus_glycop#PAN_2	SD-2b	1.2e-109
ZSDa015	ZSDa015_Chr15_gene_163790_mRNA	Chr15	RLK	1	B_lectin#S_locus_glycop#PAN_2#B_lectin#S_locus_glycop#PAN_2	DLSV	2.1e-105
ZSDa015	ZSDa015_Chr15_gene_171000_mRNA	Chr15	RLK	1	B_lectin#S_locus_glycop#PAN_2	DLSV	9.2e-122
ZSDa015	ZSDa015_Chr15_gene_164110_mRNA	Chr15	RLK	1	Stress-antifung#Stress-antifung	DLSV	5.6e-121
ZSDa015	ZSDa015_Chr16_gene_60890_mRNA	Chr16	RLK_WE	1	None	RLCK-XI	1.1e-120
ZSDa015	ZSDa015_Chr15_gene_157080_mRNA	Chr15	RLK	1	Lectin_legB	L-LEC	2.2e-119
ZSDa015	ZSDa015_Chr16_gene_59450_mRNA	Chr16	RLK	1	GUB_WAK_bind	LRK10L-2	3.6e-130
ZSDa015	ZSDa015_Chr17_gene_320790_mRNA	Chr17	RLK	1	RVT_1#LRRNT_2#LRR_8#LRR_8#LRR_8#LRR_8#LRR_4#LRR_8#LRR_8	LRR-XII-1	2.5e-113
ZSDa015	ZSDa015_Chr12_gene_75590_mRNA	Chr12	RLK	1	LRRNT_2#LRR_8#LRR_8#LRR_8#LRR_8#LRR_8#LRR_1#LRR_8	LRR-VII-1	6.3e-125
ZSDa015	ZSDa015_Chr8_gene_30150_mRNA	Chr8	RLK	1	Bact_lectin	L-LEC	1.6e-107
ZSDa015	ZSDa015_Chr18_gene_271690_mRNA	Chr18	RLK	1	Lectin_legB	L-LEC	3.1e-117
ZSDa015	ZSDa015_Chr19_gene_145040_mRNA	Chr19	RLK_WE	1	None	LRR-XI-1	1.1e-74
ZSDa018	ZSDa018_Chr18_gene_280780_mRNA	Chr18	RLK	1	Malectin_like#LRRNT_2#LRR_4#LRR_8	LRR-I-1	3.1e-113
ZSDa018	ZSDa018_Chr20_gene_291210_mRNA	Chr20	RLK	1	LRR_8#LRR_8#LRR_8#Malectin	DLSV	4e-107
ZSDa018	ZSDa018_Chr9_gene_210360_mRNA	Chr9	RLK_WE	1	None	RLCK-X	1.6e-148
ZSDa018	ZSDa018_Chr11_gene_168250_mRNA	Chr11	RLK	1	LRRNT_2#LRR_8	LRR-VI-2	8.9e-102
ZSDa018	ZSDa018_Chr16_gene_148620_mRNA	Chr16	RLK	1	GUB_WAK_bind#DUF4222	LRK10L-2	4.1e-130
ZSDa018	ZSDa018_Chr18_gene_299370_mRNA	Chr18	RLK	1	LRRNT_2#LRR_8#LRR_4	LRR-III	3.5e-114
ZSDa018	ZSDa018_Chr8_gene_154300_mRNA	Chr8	RLK_WE	1	None	RLCK-Os	1.3e-132
ZSDa018	ZSDa018_Chr5_gene_272090_mRNA	Chr5	RLK	1	B_lectin#S_locus_glycop#PAN_2	DLSV	2.7e-128
ZSDa018	ZSDa018_Chr13_gene_234400_mRNA	Chr13	RLK	1	Lectin_legB	L-LEC	6.4e-114
ZSDa018	ZSDa018_Chr8_gene_157510_mRNA	Chr8	RLK	1	Malectin_like	CrRLK1L-1	1.7e-148
ZSDa018	ZSDa018_Chr15_gene_175380_mRNA	Chr15	RLK	1	Stress-antifung#Stress-antifung	DLSV	3e-124
ZSDa018	ZSDa018_Chr1_gene_56920_mRNA	Chr1	RLK	2	GUB_WAK_bind#EGF_CA	WAK	4.4e-72
ZSDa018	ZSDa018_Chr5_gene_260280_mRNA	Chr5	RLK	1	B_lectin#S_locus_glycop#PAN_2	SD-2b	1e-104
ZSDa018	ZSDa018_Chr2_gene_80830_mRNA	Chr2	RLK	1	LRRNT_2#LRR_1#LRR_8#LRR_8#LRR_8#LRR_8#LRR_8#LRR_8#LRR_4#LRR_8	LRR-XI-1	3.7e-89
ZSDa018	ZSDa018_Chr17_gene_7040_mRNA	Chr17	RLK_WE	1	None	PERK-1	8.4e-131
ZSDa018	ZSDa018_Chr2_gene_72990_mRNA	Chr2	RLK	1	LRRNT_2#LRR_8#LRR_4#LRR_4#LRR_8#LRR_8#LRR_8#LRR_8#LRR_1#LRR_8	LRR-XI-1	1.3e-87
ZSDa018	ZSDa018_Chr17_gene_9110_mRNA	Chr17	RLK	1	LRRNT_2#LRR_4#LRR_8#LRR_8#LRR_4#LRR_4#LRR_8#LRR_4#LRR_8	LRR-XII-1	1.7e-116
ZSDa018	ZSDa018_Chr7_gene_311810_mRNA	Chr7	RLK	1	B_lectin#S_locus_glycop#PAN_2	SD-2b	9.8e-103
ZSDa018	ZSDa018_Chr5_gene_255770_mRNA	Chr5	RLK	1	LRRNT_2#LRR_8#LRR_8#LRR_8#LRR_4#LRR_8#LRR_8#LRR_8#LRR_8#LRR_8#LRR_8	LRR-Xb-1	1.1e-124
ZSDa018	ZSDa018_Chr5_gene_250290_mRNA	Chr5	RLK	1	Malectin_like#LRR_8#LRR_4	LRR-I-1	3.6e-53
ZSDa018	ZSDa018_Chr5_gene_272810_mRNA	Chr5	RLK	1	LRR_1#LRR_4#LRR_4#LRR_1	LRR-V	5.4e-102
ZSDa018	ZSDa018_Chr8_gene_88070_mRNA	Chr8	RLK	1	B_lectin#S_locus_glycop#PAN_2	SD-2b	1e-124
ZSDa018	ZSDa018_Chr13_gene_234520_mRNA	Chr13	RLK	1	Lectin_legB	L-LEC	2.8e-120
ZSDa018	ZSDa018_Chr17_gene_5650_mRNA	Chr17	RLK_WE	1	None	LRR-XIIIa	2.2e-127
ZSDa018	ZSDa018_Chr2_gene_79680_mRNA	Chr2	RLK	1	LRRNT_2#LRR_8	LRR-VI-2	1.7e-94
ZSDa018	ZSDa018_Chr4_gene_35220_mRNA	Chr4	RLK	1	LRRNT_2#LRR_8#LRR_8#LRR_4#LRR_1#LRR_8#LRR_8#LRR_8#LRR_8#LRR_8	LRR-XI-1	2.7e-117
ZSDa018	ZSDa018_Chr12_gene_199590_mRNA	Chr12	RLK	1	LRR_4#LRR_1#LRR_8#LRR_8#LRR_8#LRR_8#LRR_8	LRR-XI-1	2.3e-85
ZSDa018	ZSDa018_Chr14_gene_340300_mRNA	Chr14	RLK	1	LRR_8#LRR_8#LRR_8#LRR_4#LRR_8#LRR_8#LRR_8#LRR_8	LRR-XI-1	3.8e-106
ZSDa018	ZSDa018_Chr11_gene_161390_mRNA	Chr11	RLK	1	Stress-antifung#Stress-antifung	DLSV	2e-122
ZSDa018	ZSDa018_Chr17_gene_13550_mRNA	Chr17	RLK	1	GUB_WAK_bind#WAK_assoc	LRK10L-2	1.1e-114
ZSDa018	ZSDa018_Chr5_gene_250020_mRNA	Chr5	RLK	1	RCC1_2#RCC1_2#RCC1_2#RCC1_2	CR4L	9.7e-106
ZSDa018	ZSDa018_Chr16_gene_145040_mRNA	Chr16	RLK_WE	1	None	RLCK-IV	9e-128
ZSDa018	ZSDa018_Chr5_gene_259620_mRNA	Chr5	RLK	1	B_lectin#PAN_2	SD-2b	9.1e-106
ZSDa018	ZSDa018_Chr16_gene_141660_mRNA	Chr16	RLK	1	GUB_WAK_bind	LRK10L-2	1e-127
ZSDa018	ZSDa018_Chr17_gene_320_mRNA	Chr17	RLK	1	LRRNT_2#LRR_4#LRR_8#LRR_8#LRR_4#LRR_8#LRR_8#LRR_8	LRR-XII-1	6.8e-86
ZSDa018	ZSDa018_Chr9_gene_214290_mRNA	Chr9	RLK	1	LRRNT_2#LRR_4#LRR_4	LRR-II	3.4e-149
ZSDa018	ZSDa018_Chr14_gene_323500_mRNA	Chr14	RLK	1	LRRNT_2#LRR_8#LRR_1#LRR_8#LRR_8#LRR_8#LRR_8	LRR-Xb-1	1e-125
ZSDa018	ZSDa018_Chr13_gene_242340_mRNA	Chr13	RLK	1	Lectin_legB	L-LEC	3e-115
ZSDa018	ZSDa018_Chr15_gene_175000_mRNA	Chr15	RLK	1	B_lectin#S_locus_glycop#PAN_2	SD-2b	1.3e-123
ZSDa018	ZSDa018_Chr4_gene_41810_mRNA	Chr4	RLK	1	LRR_8#LRR_8#LRR_8	LRR-IX	3.1e-122
ZSDa018	ZSDa018_Chr8_gene_92850_mRNA	Chr8	RLK	2	LRRNT_2#LRR_8#LRR_8	LRR-III	8.1e-74
ZSDa018	ZSDa018_Chr15_gene_181730_mRNA	Chr15	RLK	1	B_lectin#S_locus_glycop#PAN_2	DLSV	8.8e-124
ZSDa018	ZSDa018_Chr8_gene_151470_mRNA	Chr8	RLK	1	Stress-antifung#Stress-antifung	DLSV	1.3e-123
ZSDa018	ZSDa018_Chr20_gene_290640_mRNA	Chr20	RLK	1	B_lectin#S_locus_glycop	SD-2b	1.2e-116
ZSDa018	ZSDa018_Chr15_gene_176280_mRNA	Chr15	RLK	1	B_lectin#S_locus_glycop#PAN_2	DLSV	3e-112
ZSDa018	ZSDa018_Chr14_gene_332040_mRNA	Chr14	RLK	1	LRRNT_2#LRR_8#LRR_8#LRR_1	LRR-IV	1.2e-131
ZSDa018	ZSDa018_Chr4_gene_47220_mRNA	Chr4	RLK_WE	1	None	PERK-1	2.6e-77
ZSDa018	ZSDa018_Chr15_gene_183930_mRNA	Chr15	RLK	1	Stress-antifung#Stress-antifung	DLSV	8.8e-118
ZSDa018	ZSDa018_Chr9_gene_208170_mRNA	Chr9	RLK	1	LRRNT_2#LRR_8#LRR_8#LRR_8#LRR_8#LRR_1#LRR_8#LRR_1#LRR_8#LRR_1#LRR_8	LRR-XI-1	6.5e-94
ZSDa018	ZSDa018_Chr5_gene_260930_mRNA	Chr5	RLK	1	B_lectin#S_locus_glycop#PAN_1	SD-2b	1.2e-106
ZSDa018	ZSDa018_Chr2_gene_80820_mRNA	Chr2	RLK	1	LRRNT_2#LRR_4#LRR_1#LRR_8#LRR_8#LRR_8#LRR_1#LRR_8#LRR_8#LRR_8#LRR_8	LRR-XI-1	1.2e-111
ZSDa018	ZSDa018_Chr5_gene_265790_mRNA	Chr5	RLK	1	LRRNT_2#LRR_8	LRR-VI-2	8.5e-109
ZSDa018	ZSDa018_Chr5_gene_269850_mRNA	Chr5	RLK	1	LysM	LysM	4.9e-99
ZSDa018	ZSDa018_Chr16_gene_141210_mRNA	Chr16	RLK	1	GUB_WAK_bind	LRK10L-2	3.8e-59
ZSDa018	ZSDa018_Chr19_gene_118360_mRNA	Chr19	RLK	1	Malectin_like	CrRLK1L-1	3.6e-126
ZSDa018	ZSDa018_Chr15_gene_180720_mRNA	Chr15	RLK	1	B_lectin#S_locus_glycop#PAN_2	DLSV	9.7e-118
ZSDa018	ZSDa018_Chr8_gene_88060_mRNA	Chr8	RLK	1	B_lectin#S_locus_glycop#PAN_2	SD-2b	4.4e-125
ZSDa018	ZSDa018_Chr8_gene_154410_mRNA	Chr8	RLK_WE	1	None	RLCK-Os	1.1e-150
ZSDa018	ZSDa018_Chr20_gene_291890_mRNA	Chr20	RLK	1	LRRNT_2#LRR_8#LRR_8#LRR_8#LRR_8#LRR_8#LRR_8#LRR_1	LRR-XI-1	7.8e-102
ZSDa018	ZSDa018_Chr7_gene_303240_mRNA	Chr7	RLK	1	GUB_WAK_bind#WAK#EGF_3#EGF_CA	WAK	1.1e-108
ZSDa018	ZSDa018_Chr17_gene_10320_mRNA	Chr17	RLK	1	B_lectin#S_locus_glycop#PAN_4	SD-2b	4.5e-105
ZSDa018	ZSDa018_Chr13_gene_242360_mRNA	Chr13	RLK	1	LysM#LysM	LysM	2e-76
ZSDa018	ZSDa018_Chr2_gene_80870_mRNA	Chr2	RLK	1	LRRNT_2#LRR_8#LRR_4#LRR_4#LRR_4#LRR_1#LRR_4#LRR_8#LRR_8#LRR_8	LRR-XI-1	1.3e-88
ZSDa018	ZSDa018_Chr8_gene_150850_mRNA	Chr8	RLK	1	LRRNT_2#LRR_1#LRR_8#LRR_4	LRR-V	1.5e-116
ZSDa018	ZSDa018_Chr2_gene_73390_mRNA	Chr2	RLK	1	LRRNT_2#LRR_4#LRR_4#LRR_8#LRR_4#LRR_8#LRR_8#LRR_1#LRR_4#LRR_1#LRR_1#LRR_8#LRR_8#LRR_1#LRR_1	LRR-XI-1	4.2e-92
ZSDa018	ZSDa018_Chr18_gene_281250_mRNA	Chr18	RLK	1	Lectin_legB	L-LEC	3.2e-117
ZSDa018	ZSDa018_Chr9_gene_213230_mRNA	Chr9	RLK	1	LRRNT_2#LRR_8#LRR_8#LRR_8#LRR_8	LRR-VIII-1	2.1e-132
ZSDa018	ZSDa018_Chr5_gene_264120_mRNA	Chr5	RLK	1	B_lectin#PAN_1	SD-2b	4.7e-118
ZSDa018	ZSDa018_Chr10_gene_26890_mRNA	Chr10	RLK	1	B_lectin#S_locus_glycop#PAN_2	SD-2b	2.8e-120
ZSDa018	ZSDa018_Chr5_gene_253840_mRNA	Chr5	RLK_WE	1	None	PERK-1	2.7e-125
ZSDa018	ZSDa018_Chr8_gene_154400_mRNA	Chr8	RLK_WE	1	None	RLCK-Os	1.8e-126
ZSDa018	ZSDa018_Chr2_gene_73160_mRNA	Chr2	RLK_WE	1	None	LRR-XI-1	8.8e-66
ZSDa018	ZSDa018_Chr17_gene_1220_mRNA	Chr17	RLK	1	LRRNT_2#LRR_8#LRR_4#LRR_8#LRR_8#LRR_8#LRR_8#LRR_8#LRR_8#LRR_1#LRR_8	LRR-XII-1	1.7e-118
ZSDa018	ZSDa018_Chr5_gene_263840_mRNA	Chr5	RLK	1	LysM#LysM	LysM	1.9e-85
ZSDa018	ZSDa018_Chr15_gene_175060_mRNA	Chr15	RLK	1	B_lectin#S_locus_glycop#PAN_2	DLSV	6.5e-124
ZSDa018	ZSDa018_Chr17_gene_1120_mRNA	Chr17	RLK	1	LRRNT_2#LRR_8#LRR_1#LRR_8#LRR_4#LRR_1#LRR_8#LRR_8	LRR-XII-1	9.7e-124
ZSDa018	ZSDa018_Chr3_gene_104030_mRNA	Chr3	RLK	1	LRRNT_2#LRR_4#LRR_1#LRR_1#LRR_8#LRR_4#LRR_8#LRR_1#LRR_8	LRR-XI-1	2.5e-87
ZSDa018	ZSDa018_Chr17_gene_9860_mRNA	Chr17	RLK	1	LRRNT_2#LRR_8#LRR_8#LRR_8#LRR_1#LRR_8#LRR_1#LRR_1#LRR_8	LRR-XI-1	4.5e-106
ZSDa018	ZSDa018_Chr8_gene_151400_mRNA	Chr8	RLK	1	Stress-antifung#Stress-antifung	DLSV	7.5e-123
ZSDa018	ZSDa018_Chr16_gene_141290_mRNA	Chr16	RLK	1	GUB_WAK_bind	LRK10L-2	8.8e-103
ZSDa018	ZSDa018_Chr14_gene_331530_mRNA	Chr14	RLK_WE	1	None	RLCK-IXa	8.4e-79
ZSDa018	ZSDa018_Chr8_gene_154340_mRNA	Chr8	RLK_WE	1	None	RLCK-Os	2.4e-131
ZSDa018	ZSDa018_Chr16_gene_141750_mRNA	Chr16	RLK	1	GUB_WAK_bind	LRK10L-2	3.7e-125
ZSDa018	ZSDa018_Chr14_gene_332740_mRNA	Chr14	RLK	1	GUB_WAK_bind	URK-3	1.2e-48
ZSDa018	ZSDa018_Chr17_gene_13440_mRNA	Chr17	RLK	1	LRRNT_2#LRR_1#LRR_8#LRR_1	LRR-III	3.2e-95
ZSDa018	ZSDa018_Chr19_gene_129960_mRNA	Chr19	RLK	1	Malectin_like	CrRLK1L-1	2.5e-136
ZSDa018	ZSDa018_Chr9_gene_213070_mRNA	Chr9	RLK	1	LRRNT_2#LRR_8#LRR_4#LRR_8#LRR_1#LRR_8#LRR_8#LRR_1#LRR_8	LRR-VII-1	9.5e-130
ZSDa018	ZSDa018_Chr15_gene_183760_mRNA	Chr15	RLK	1	B_lectin#S_locus_glycop#PAN_2	SD-2b	2.6e-116
ZSDa018	ZSDa018_Chr13_gene_242070_mRNA	Chr13	RLK	1	LRRNT_2#LRR_8#LRR_8#LRR_1#LRR_8#LRR_8#LRR_8#LRR_8#LRR_8	LRR-XI-1	1.5e-119
ZSDa018	ZSDa018_Chr8_gene_151460_mRNA	Chr8	RLK	1	Stress-antifung#Stress-antifung	DLSV	6.7e-123
ZSDa018	ZSDa018_Chr2_gene_73000_mRNA	Chr2	RLK	1	LRRNT_2#LRR_8#LRR_8#LRR_4#LRR_4#LRR_4#LRR_8#LRR_4#LRR_1#LRR_8#LRR_4#LRR_8	LRR-XI-1	6.8e-91
ZSDa018	ZSDa018_Chr13_gene_234470_mRNA	Chr13	RLK	1	Lectin_legB	L-LEC	1.4e-117
ZSDa018	ZSDa018_Chr13_gene_242320_mRNA	Chr13	RLK	1	Lectin_legB	L-LEC	1.4e-114
ZSDa018	ZSDa018_Chr7_gene_303000_mRNA	Chr7	RLK	1	B_lectin#S_locus_glycop#PAN_2	SD-2b	3.2e-104
ZSDa018	ZSDa018_Chr3_gene_98810_mRNA	Chr3	RLK	1	LRRNT_2#LRR_4#LRR_8#LRR_8#LRR_8#LRR_8#LRR_8#LRR_8	LRR-XI-1	2.2e-97
ZSDa018	ZSDa018_Chr15_gene_184870_mRNA	Chr15	RLK	1	Lectin_legB	L-LEC	1.5e-119
ZSDa018	ZSDa018_Chr16_gene_141740_mRNA	Chr16	RLK	1	GUB_WAK_bind	LRK10L-2	6e-128
ZSDa018	ZSDa018_Chr8_gene_96560_mRNA	Chr8	RLK	1	Lectin_legB	L-LEC	1.8e-117
ZSDa018	ZSDa018_Chr17_gene_1090_mRNA	Chr17	RLK	1	LRRNT_2#LRR_4#LRR_1#LRR_8#LRR_8#LRR_8#LRR_8#LRR_8#LRR_1#LRR_8	LRR-XII-1	6e-120
ZSDa018	ZSDa018_Chr5_gene_272610_mRNA	Chr5	RLK	1	LRRNT_2#LRR_8#LRR_4#LRR_1#LRR_4#LRR_8#LRR_8#LRR_8#LRR_1#Island#LRR_8	LRR-Xb-1	1.3e-129
ZSDa018	ZSDa018_Chr8_gene_159150_mRNA	Chr8	RLK	1	Lectin_legB	L-LEC	5.4e-72
ZSDa018	ZSDa018_Chr15_gene_183750_mRNA	Chr15	RLK	1	B_lectin#S_locus_glycop#PAN_2	SD-2b	2e-116
ZSDa018	ZSDa018_Chr15_gene_174930_mRNA	Chr15	RLK	1	B_lectin#S_locus_glycop#PAN_2	SD-2b	1.3e-123
ZSDa018	ZSDa018_Chr13_gene_234050_mRNA	Chr13	RLK_WE	1	None	PERK-1	2.5e-156
ZSDa018	ZSDa018_Chr5_gene_255270_mRNA	Chr5	RLK	1	Malectin_like#LRR_4	LRR-I-1	3.1e-104
ZSDa018	ZSDa018_Chr15_gene_175130_mRNA	Chr15	RLK	1	B_lectin#S_locus_glycop#PAN_2	DLSV	1.5e-110
ZSDa018	ZSDa018_Chr8_gene_91100_mRNA	Chr8	RLK	1	LRRNT_2#LRR_8#LRR_8#LRR_8#LRR_8#LRR_1#LRR_8#LRR_1	LRR-XII-1	5.2e-100
ZSDa018	ZSDa018_Chr13_gene_242310_mRNA	Chr13	RLK	1	Lectin_legB	L-LEC	1.8e-119
ZSDa018	ZSDa018_Chr19_gene_126300_mRNA	Chr19	RLK	1	LRR_8#LRR_4#LRR_8#Malectin	DLSV	2.5e-112
ZSDa018	ZSDa018_Chr15_gene_174970_mRNA	Chr15	RLK	1	B_lectin#S_locus_glycop#PAN_2	SD-2b	3.7e-119
ZSDa018	ZSDa018_Chr16_gene_138460_mRNA	Chr16	RLK	1	LRRNT_2#LRR_8#LRR_8#LRR_8#LRR_8#LRR_8#LRR_1#LRR_8	LRR-XII-1	2.4e-102
ZSDa018	ZSDa018_Chr15_gene_179820_mRNA	Chr15	RLK_WE	1	None	RLCK-IXa	1.3e-90
ZSDa018	ZSDa018_Chr15_gene_175070_mRNA	Chr15	RLK	1	B_lectin#S_locus_glycop#PAN_2	DLSV	9.7e-127
ZSDa018	ZSDa018_Chr4_gene_46510_mRNA	Chr4	RLK_WE	1	None	RLCK-V	2.1e-158
ZSDa018	ZSDa018_Chr8_gene_96540_mRNA	Chr8	RLK	1	LRR_4#LRR_8#LRR_1#LRR_8#LRR_4#LRR_8#LRR_8#LRR_1	LRR-XI-1	2.5e-109
ZSDa018	ZSDa018_Chr15_gene_176420_mRNA	Chr15	RLK	1	Lectin_legB	L-LEC	7.3e-120
ZSDa018	ZSDa018_Chr4_gene_43670_mRNA	Chr4	RLK_WE	1	None	RLCK-V	1.1e-155
ZSDa018	ZSDa018_Chr7_gene_311820_mRNA	Chr7	RLK	1	B_lectin#S_locus_glycop#PAN_1	SD-2b	4.5e-102
ZSDa018	ZSDa018_Chr2_gene_80860_mRNA	Chr2	RLK	1	LRRNT_2#LRR_8#LRR_4#LRR_4#LRR_8#LRR_8#LRR_1#LRR_8#LRR_8#LRR_8#LRR_8#LRR_8	LRR-XI-1	4e-88
ZSDa018	ZSDa018_Chr12_gene_199730_mRNA	Chr12	RLK	1	LRRNT_2#LRR_1#LRR_8#LRR_1	LRR-III	1.7e-117
ZSDa018	ZSDa018_Chr9_gene_217620_mRNA	Chr9	RLK	1	LRR_8#LRR_1	LRR-III	2.9e-99
ZSDa018	ZSDa018_Chr2_gene_73060_mRNA	Chr2	RLK	1	LRRNT_2#LRR_8#LRR_4#LRR_4#LRR_8#LRR_8#LRR_8#LRR_8#LRR_1#LRR_8	LRR-XI-1	4.7e-87
ZSDa018	ZSDa018_Chr16_gene_141780_mRNA	Chr16	RLK_WE	1	None	LRK10L-2	6.8e-108
ZSDa018	ZSDa018_Chr20_gene_283560_mRNA	Chr20	RLK	1	LRRNT_2#LRR_8	LRR-VI-2	6.8e-107
ZSDa018	ZSDa018_Chr14_gene_322490_mRNA	Chr14	RLK	1	LRRNT_2#LRR_8#LRR_8#LRR_8#LRR_8#LRR_1	LRR-VII-1	1.1e-124
ZSDa018	ZSDa018_Chr20_gene_283600_mRNA	Chr20	RLK_WE	1	None	Extensin	5e-137
ZSDa018	ZSDa018_Chr2_gene_81350_mRNA	Chr2	RLK	1	LRRNT_2#LRR_4	LRR-XI-1	9.4e-78
ZSDa018	ZSDa018_Chr3_gene_107500_mRNA	Chr3	RLK	1	LRRNT_2#LRR_8	LRR-III	9.2e-87
ZSDa018	ZSDa018_Chr2_gene_75080_mRNA	Chr2	RLK	1	LRRNT_2#LRR_8	LRR-III	1.9e-82
ZSDa018	ZSDa018_Chr20_gene_291090_mRNA	Chr20	RLK	1	LRR_8#LRR_8#LRR_1#Malectin	DLSV	2.5e-111
ZSDa018	ZSDa018_Chr15_gene_175040_mRNA	Chr15	RLK	1	B_lectin#S_locus_glycop#PAN_2	DLSV	6.3e-122
ZSDa018	ZSDa018_Chr7_gene_303270_mRNA	Chr7	RLK	1	GUB_WAK_bind#WAK#EGF_3#EGF_CA	WAK	8.5e-99
ZSDa018	ZSDa018_Chr15_gene_176270_mRNA	Chr15	RLK	1	B_lectin#S_locus_glycop#PAN_2	DLSV	3.4e-126
ZSDa018	ZSDa018_Chr13_gene_234640_mRNA	Chr13	RLK	1	Lectin_legB	L-LEC	1.5e-110
ZSDa018	ZSDa018_Chr13_gene_234390_mRNA	Chr13	RLK	1	Lectin_legB	L-LEC	3.9e-117
ZSDa018	ZSDa018_Chr14_gene_334890_mRNA	Chr14	RLK	1	LRRNT_2#LRR_4#LRR_8	LRR-Xa	2.1e-136
ZSDa018	ZSDa018_Chr15_gene_181980_mRNA	Chr15	RLK	1	B_lectin#S_locus_glycop#PAN_2	DLSV	5.6e-121
ZSDa018	ZSDa018_Chr5_gene_255630_mRNA	Chr5	RLK_WE	1	None	URK-2	8.1e-99
ZSDa018	ZSDa018_Chr10_gene_21050_mRNA	Chr10	RLK	2	LRR_8#LRR_8	LRR-VIII-1	1e-253
ZSDa018	ZSDa018_Chr20_gene_285650_mRNA	Chr20	RLK	2	LRRNT_2#LRR_1#LRR_8#LRR_8#LRR_8#LRR_8#LRR_8#LRR_4	LRR-XII-1	6.1e-100
ZSDa018	ZSDa018_Chr17_gene_9870_mRNA	Chr17	RLK	1	LRRNT_2#LRR_8#LRR_8#LRR_8#LRR_4#LRR_8	LRR-XI-1	1.3e-104
ZSDa018	ZSDa018_Chr15_gene_175080_mRNA	Chr15	RLK	1	B_lectin#S_locus_glycop#PAN_2	DLSV	5e-123
ZSDa018	ZSDa018_Chr16_gene_141730_mRNA	Chr16	RLK	1	GUB_WAK_bind	LRK10L-2	4.8e-115
ZSDa018	ZSDa018_Chr15_gene_183290_mRNA	Chr15	RLK	1	Malectin_like	CrRLK1L-1	2.6e-153
ZSDa018	ZSDa018_Chr4_gene_36240_mRNA	Chr4	RLK	1	Stress-antifung#Stress-antifung#Stress-antifung#Stress-antifung	DLSV	3.6e-122
ZSDa018	ZSDa018_Chr18_gene_299590_mRNA	Chr18	RLK	1	LRRNT_2#LRR_8#LRR_8#LRRNT_2#LRR_8	LRR-IX	3.4e-150
ZSDa018	ZSDa018_Chr15_gene_189240_mRNA	Chr15	RLK	1	LRRNT_2#LRR_4#LRR_8#LRR_4#LRR_4#LRR_8	LRR-XI-1	5.3e-104
ZSDa018	ZSDa018_Chr19_gene_130030_mRNA	Chr19	RLK	1	Malectin_like	CrRLK1L-1	5.6e-125
ZSDa018	ZSDa018_Chr19_gene_126250_mRNA	Chr19	RLK	1	LRR_8#LRR_4#LRR_8#Malectin	DLSV	5.8e-113
ZSDa018	ZSDa018_Chr8_gene_159070_mRNA	Chr8	RLK_WE	1	None	PERK-1	4.7e-154
ZSDa018	ZSDa018_Chr19_gene_130540_mRNA	Chr19	RLK	1	Stress-antifung#Stress-antifung	DLSV	5.2e-107
ZSDa018	ZSDa018_Chr3_gene_105360_mRNA	Chr3	RLK_WE	1	None	DLSV	1.6e-111
ZSDa018	ZSDa018_Chr15_gene_183720_mRNA	Chr15	RLK	1	B_lectin#S_locus_glycop#PAN_2	SD-2b	1.2e-109
ZSDa018	ZSDa018_Chr4_gene_36480_mRNA	Chr4	RLK	1	LysM	LysM	4.1e-95
ZSDa018	ZSDa018_Chr1_gene_58850_mRNA	Chr1	RLK	1	GUB_WAK_bind	LRK10L-2	2.5e-129
ZSDa018	ZSDa018_Chr17_gene_6490_mRNA	Chr17	RLK	1	GUB_WAK_bind#WAK_assoc	LRK10L-2	5.3e-135
ZSDa018	ZSDa018_Chr3_gene_102290_mRNA	Chr3	RLK_WE	1	None	LRR-I-2	2.5e-143
ZSDa018	ZSDa018_Chr8_gene_92620_mRNA	Chr8	RLK	1	LRRNT_2#LRR_1#LRR_8	LRR-III	8.8e-82
ZSDa018	ZSDa018_Chr2_gene_69340_mRNA	Chr2	RLK_WE	1	None	RLCK-IXa	5.3e-114
ZSDa018	ZSDa018_Chr15_gene_181950_mRNA	Chr15	RLK	1	B_lectin#S_locus_glycop#PAN_2	DLSV	6.2e-121
ZSDa018	ZSDa018_Chr5_gene_266850_mRNA	Chr5	RLK	1	LRRNT_2#LRR_8#LRR_8#LRR_1	LRR-III	1.9e-111
ZSDa018	ZSDa018_Chr2_gene_81370_mRNA	Chr2	RLK	1	LRRNT_2#LRR_8#LRR_8#LRR_8#LRR_8#LRR_8#LRR_1#LRR_8	LRR-XI-1	5.3e-75
ZSDa018	ZSDa018_Chr5_gene_251450_mRNA	Chr5	RLK	1	LRRNT_2#LRR_8#LRR_1#LRR_1#LRR_8#LRR_1#LRR_8#LRR_8#LRR_8	LRR-XII-1	4e-121
ZSDa018	ZSDa018_Chr8_gene_151100_mRNA	Chr8	RLK	1	B_lectin#S_locus_glycop#PAN_2	SD-2b	1.2e-119
ZSDa018	ZSDa018_Chr11_gene_162430_mRNA	Chr11	RLK	1	LRRNT_2#LRR_8#LRR_8#LRR_8#LRR_8#LRR_8#LRR_1#LRR_8	LRR-Xb-1	3.2e-130
ZSDa018	ZSDa018_Chr4_gene_43190_mRNA	Chr4	RLK	1	SPARK	RKF3	8.6e-103
ZSDa018	ZSDa018_Chr3_gene_104070_mRNA	Chr3	RLK	1	LRRNT_2#LRR_8#LRR_1	LRR-III	7e-87
ZSDa018	ZSDa018_Chr13_gene_234360_mRNA	Chr13	RLK	1	LRRNT_2#LRR_8#LRR_8#LRR_8#LRR_8#LRR_8#LRR_8	LRR-XI-1	4.2e-110
ZSDa018	ZSDa018_Chr15_gene_181990_mRNA	Chr15	RLK	1	B_lectin#S_locus_glycop#PAN_2	DLSV	8.7e-122
ZSDa018	ZSDa018_Chr12_gene_192060_mRNA	Chr12	RLK	1	B_lectin#S_locus_glycop#PAN_2	SD-2b	6.5e-95
ZSDa018	ZSDa018_Chr16_gene_141320_mRNA	Chr16	RLK	1	GUB_WAK_bind	LRK10L-2	4.7e-80
ZSDa018	ZSDa018_Chr16_gene_137260_mRNA	Chr16	RLK_WE	1	None	RLCK-X	1e-154
ZSDa018	ZSDa018_Chr8_gene_154380_mRNA	Chr8	RLK_WE	1	None	RLCK-Os	3.4e-151
ZSDa018	ZSDa018_Chr5_gene_267480_mRNA	Chr5	RLK	1	LRRNT_2#LRR_8#LRR_8#LRR_8	LRR-III	3.4e-94
ZSDa018	ZSDa018_Chr8_gene_89100_mRNA	Chr8	RLK	1	Lectin_legB	L-LEC	4.8e-118
ZSDa018	ZSDa018_Chr18_gene_281260_mRNA	Chr18	RLK	1	Lectin_legB	L-LEC	5.5e-118
ZSDa018	ZSDa018_Chr9_gene_212260_mRNA	Chr9	RLK	1	Malectin_like	CrRLK1L-1	2.2e-146
ZSDa018	ZSDa018_Chr13_gene_234430_mRNA	Chr13	RLK	1	Lectin_legB	L-LEC	1.1e-116
ZSDa018	ZSDa018_Chr7_gene_303260_mRNA	Chr7	RLK	1	GUB_WAK_bind#WAK#EGF_3#EGF_CA	WAK	7.8e-104
ZSDa018	ZSDa018_Chr8_gene_151160_mRNA	Chr8	RLK	1	B_lectin#S_locus_glycop#PAN_2	DLSV	2.1e-127
ZSDa018	ZSDa018_Chr18_gene_273800_mRNA	Chr18	RLK	1	LRRNT_2#LRR_8#LRR_1#LRR_8#LRR_8#LRR_4#LRR_8#LRR_8	LRR-XIIIb	4e-155
ZSDa018	ZSDa018_Chr3_gene_99090_mRNA	Chr3	RLK	1	LRRNT_2#LRR_8#LRR_8#LRR_1#LRR_8#LRR_1#LRR_1#LRR_8#LRR_8	LRR-XII-1	2.4e-105
ZSDa018	ZSDa018_Chr2_gene_81430_mRNA	Chr2	RLK	1	LRR_8#LRR_1#LRR_1#LRR_8#LRR_1#LRR_8#LRR_4	LRR-XI-1	5.1e-82
ZSDa018	ZSDa018_Chr7_gene_304140_mRNA	Chr7	RLK	1	LRRNT_2#LRR_8	LRR-VI-2	1.7e-109
ZSDa018	ZSDa018_Chr16_gene_141280_mRNA	Chr16	RLK	1	GUB_WAK_bind	LRK10L-2	4.2e-98
ZSDa018	ZSDa018_Chr20_gene_285810_mRNA	Chr20	RLK_WE	1	None	RLCK-V	1.2e-158
ZSDa018	ZSDa018_Chr13_gene_234410_mRNA	Chr13	RLK	1	Lectin_legB	L-LEC	5.9e-116
ZSDa018	ZSDa018_Chr8_gene_91650_mRNA	Chr8	RLK_WE	1	None	DLSV	3.3e-108
ZSDa018	ZSDa018_Chr13_gene_234600_mRNA	Chr13	RLK	1	Lectin_legB	L-LEC	2.3e-116
ZSDa018	ZSDa018_Chr5_gene_267530_mRNA	Chr5	RLK	1	GUB_WAK_bind#WAK_assoc	LRK10L-2	2.6e-129
ZSDa018	ZSDa018_Chr16_gene_143500_mRNA	Chr16	RLK	1	Lectin_legB	L-LEC	9.3e-108
ZSDa018	ZSDa018_Chr17_gene_15360_mRNA	Chr17	RLK	1	LRRNT_2#LRR_1#LRR_8	LRR-II	1.9e-152
ZSDa018	ZSDa018_Chr18_gene_297550_mRNA	Chr18	RLK	1	B_lectin#S_locus_glycop#PAN_1	SD-2b	3.4e-108
ZSDa018	ZSDa018_Chr1_gene_56820_mRNA	Chr1	RLK	1	GUB_WAK_bind#WAK#FXa_inhibition#EGF_CA	WAK	2.7e-103
ZSDa018	ZSDa018_Chr17_gene_9020_mRNA	Chr17	RLK	1	LRRNT_2#LRR_8#LRR_8#LRR_8#LRR_8#LRR_8#LRR_8#LRR_1#LRR_8	LRR-XII-1	6.3e-121
ZSDa018	ZSDa018_Chr19_gene_115520_mRNA	Chr19	RLK	1	SPARK	RKF3	3.8e-108
ZSDa018	ZSDa018_Chr15_gene_178140_mRNA	Chr15	RLK	1	B_lectin#S_locus_glycop#PAN_2	SD-2b	4.9e-119
ZSDa018	ZSDa018_Chr5_gene_267520_mRNA	Chr5	RLK	1	GUB_WAK_bind#WAK_assoc	LRK10L-2	2.6e-134
ZSDa018	ZSDa018_Chr15_gene_191070_mRNA	Chr15	RLK	1	LRRNT_2#LRR_8	LRR-III	3.2e-76
ZSDa018	ZSDa018_Chr17_gene_350_mRNA	Chr17	RLK	1	LRRNT_2#LRR_8#LRR_8#LRR_8#LRR_8#LRR_4#LRR_8#LRR_8#LRR_8	LRR-XII-1	3e-85
ZSDa018	ZSDa018_Chr17_gene_3350_mRNA	Chr17	RLK	1	B_lectin#S_locus_glycop#PAN_2	SD-2b	5.5e-108
ZSDa018	ZSDa018_Chr17_gene_9880_mRNA	Chr17	RLK	1	LRRNT_2#LRR_8#LRR_8#LRR_8#LRR_1#LRR_1#LRR_4#LRR_8	LRR-XI-1	2.2e-106
ZSDa018	ZSDa018_Chr18_gene_295570_mRNA	Chr18	RLK	1	LRRNT_2#LRR_8#LRR_8#LRR_1	LRR-III	6.4e-91
ZSDa018	ZSDa018_Chr14_gene_325410_mRNA	Chr14	RLK	1	LRRNT_2#LRR_4#LRR_4#LRR_1#LRR_8#LRR_1#LRR_8#LRR_8	LRR-XI-1	4e-101
ZSDa018	ZSDa018_Chr11_gene_167740_mRNA	Chr11	RLK	1	LRR_1#LRR_4#LRR_4	LRR-III	3.4e-83
ZSDa018	ZSDa018_Chr19_gene_128840_mRNA	Chr19	RLK_WE	1	None	LysM	1.3e-97
ZSDa018	ZSDa018_Chr17_gene_10290_mRNA	Chr17	RLK	1	B_lectin#S_locus_glycop#PAN_2	SD-2b	5.2e-115
ZSDa018	ZSDa018_Chr8_gene_151140_mRNA	Chr8	RLK	1	B_lectin#S_locus_glycop#PAN_2	SD-2b	5.7e-121
ZSDa018	ZSDa018_Chr2_gene_81400_mRNA	Chr2	RLK	1	LRRNT_2#LRR_8#LRR_8#LRR_8#LRR_8	LRR-XI-1	1.4e-75
ZSDa018	ZSDa018_Chr14_gene_334360_mRNA	Chr14	RLK_WE	1	None	RLCK-IXa	2.6e-116
ZSDa018	ZSDa018_Chr2_gene_69360_mRNA	Chr2	RLK_WE	1	None	RLCK-IXa	1.4e-62
ZSDa018	ZSDa018_Chr10_gene_22190_mRNA	Chr10	RLK	1	LRR_4#LRR_8	LRR-VII-1	6.5e-126
ZSDa018	ZSDa018_Chr15_gene_190170_mRNA	Chr15	RLK	1	B_lectin#S_locus_glycop#PAN_2	DLSV	6.9e-102
ZSDa018	ZSDa018_Chr5_gene_261250_mRNA	Chr5	RLK_WE	1	None	LRR-Xb-1	1.9e-101
ZSDa018	ZSDa018_Chr15_gene_184840_mRNA	Chr15	RLK	1	LRRNT_2#LRR_8#LRR_4#LRR_8#LRR_8#LRR_4#LRR_8#LRR_4#LRR_8#LRR_8#LRR_1#LRR_8#LRR_8	LRR-XI-1	2.4e-98
ZSDa018	ZSDa018_Chr16_gene_141310_mRNA	Chr16	RLK	1	GUB_WAK_bind	LRK10L-2	2.1e-79
ZSDa018	ZSDa018_Chr5_gene_260640_mRNA	Chr5	RLK	1	LRR_1#LRR_8#LRR_8#LRR_4#LRR_8#LRR_8#LRR_8#LRR_8	LRR-XI-1	5.4e-71
ZSDa018	ZSDa018_Chr5_gene_250200_mRNA	Chr5	RLK	1	Malectin_like#LRR_1#LRR_8	LRR-I-1	3.7e-110
ZSDa018	ZSDa018_Chr5_gene_253880_mRNA	Chr5	RLK_WE	1	None	PERK-1	9.7e-118
ZSDa018	ZSDa018_Chr15_gene_181970_mRNA	Chr15	RLK	1	B_lectin#S_locus_glycop#PAN_2	DLSV	1.5e-121
ZSDa018	ZSDa018_Chr19_gene_114970_mRNA	Chr19	RLK	1	LRRNT_2#LRR_1#LRR_8#LRR_1#LRR_8#LRR_8#LRR_8#LRR_4#LRR_8#LRR_8#LRR_8#LRR_8	LRR-XII-1	4.1e-78
ZSDa018	ZSDa018_Chr19_gene_113260_mRNA	Chr19	RLK_WE	1	None	RLCK-IXa	2.7e-112
ZSDa018	ZSDa018_Chr2_gene_72980_mRNA	Chr2	RLK	1	LRRNT_2#LRR_4#LRR_8#LRR_4#LRR_4#LRR_1#LRR_8#LRR_8#LRR_8	LRR-XI-1	3.8e-90
ZSDa018	ZSDa018_Chr15_gene_175050_mRNA	Chr15	RLK	1	B_lectin#S_locus_glycop#PAN_2#B_lectin#S_locus_glycop#PAN_2	DLSV	2.1e-105
ZSDa018	ZSDa018_Chr5_gene_260290_mRNA	Chr5	RLK	1	B_lectin#S_locus_glycop#PAN_2	SD-2b	6.4e-108
ZSDa018	ZSDa018_Chr19_gene_126260_mRNA	Chr19	RLK	1	LRR_8#LRR_4#LRR_4#LRR_8#LRR_1#Malectin	DLSV	1.1e-97
ZSDa018	ZSDa018_Chr9_gene_211900_mRNA	Chr9	RLK	1	GUB_WAK_bind#RANK_CRD_2	WAK_LRK10L-1	2.6e-121
ZSDa018	ZSDa018_Chr8_gene_154320_mRNA	Chr8	RLK_WE	1	None	RLCK-Os	3.8e-64
ZSDa018	ZSDa018_Chr17_gene_340_mRNA	Chr17	RLK	2	LRR_8	LRR-XII-1	9.5e-218
ZSDa018	ZSDa018_Chr8_gene_151450_mRNA	Chr8	RLK	1	Stress-antifung#Stress-antifung	DLSV	6.7e-124
ZSDa018	ZSDa018_Chr5_gene_258650_mRNA	Chr5	RLK	1	LRRNT_2#LRR_1#LRR_8	LRR-II	1.8e-156
ZSDa018	ZSDa018_Chr2_gene_73120_mRNA	Chr2	RLK	1	LRRNT_2#LRR_4#LRR_4#LRR_4#LRR_1#LRR_8#LRR_4#LRR_8#LRR_1#LRR_4#LRR_8#LRR_4#LRR_1#LRR_8	LRR-XI-1	3.3e-90
ZSDa018	ZSDa018_Chr2_gene_77810_mRNA	Chr2	RLK	1	LysM#LysM	LysM	1e-54
ZSDa018	ZSDa018_Chr8_gene_151510_mRNA	Chr8	RLK	1	Stress-antifung#Stress-antifung	DLSV	2.1e-120
ZSDa018	ZSDa018_Chr20_gene_288800_mRNA	Chr20	RLK	1	LRRNT_2#LRR_8#LRR_1#LRR_4	LRR-III	1.3e-105
ZSDa018	ZSDa018_Chr19_gene_113510_mRNA	Chr19	RLK_WE	1	None	LRR-XI-1	1.6e-75
[truncated: 2,121 more rows]

## Sheet: TableS2
ZSDa005_Chr10_gene_39280_mRNA	WGD/SD
ZSDa005_Chr3_gene_332390_mRNA	Dispersed
ZSDa005_Chr13_gene_294250_mRNA	Proximal
ZSDa005_Chr8_gene_121620_mRNA	Proximal
ZSDa005_Chr15_gene_275460_mRNA	Proximal
ZSDa005_Chr8_gene_133810_mRNA	WGD/SD
ZSDa005_Chr4_gene_8190_mRNA	WGD/SD
ZSDa005_Chr17_gene_57940_mRNA	Tandem
ZSDa005_Chr5_gene_96870_mRNA	WGD/SD
ZSDa005_Chr9_gene_29830_mRNA	WGD/SD
ZSDa005_Chr20_gene_108650_mRNA	Dispersed
ZSDa005_Chr19_gene_239330_mRNA	WGD/SD
ZSDa005_Chr15_gene_260430_mRNA	Proximal
ZSDa005_Chr2_gene_144610_mRNA	Tandem
ZSDa005_Chr4_gene_7020_mRNA	Dispersed
ZSDa005_Chr4_gene_2670_mRNA	Dispersed
ZSDa005_Chr15_gene_260320_mRNA	Tandem
ZSDa005_Chr8_gene_130450_mRNA	Tandem
ZSDa005_Chr16_gene_289380_mRNA	Proximal
ZSDa005_Chr13_gene_316070_mRNA	Proximal
ZSDa005_Chr15_gene_260450_mRNA	WGD/SD
ZSDa005_Chr5_gene_157990_mRNA	Dispersed
ZSDa005_Chr8_gene_135740_mRNA	Tandem
ZSDa005_Chr8_gene_121570_mRNA	Dispersed
ZSDa005_Chr17_gene_57030_mRNA	WGD/SD
ZSDa005_Chr19_gene_250350_mRNA	Tandem
ZSDa005_Chr5_gene_99890_mRNA	WGD/SD
ZSDa005_Chr17_gene_56610_mRNA	Tandem
ZSDa005_Chr2_gene_152430_mRNA	Proximal
ZSDa005_Chr18_gene_82570_mRNA	Dispersed
ZSDa005_Chr12_gene_226790_mRNA	WGD/SD
ZSDa005_Chr19_gene_242470_mRNA	Dispersed
ZSDa005_Chr15_gene_261750_mRNA	Tandem
ZSDa005_Chr15_gene_276420_mRNA	Dispersed
ZSDa005_Chr16_gene_289370_mRNA	Tandem
ZSDa005_Chr4_gene_11130_mRNA	Tandem
ZSDa005_Chr4_gene_5720_mRNA	Dispersed
ZSDa005_Chr15_gene_267480_mRNA	Tandem
ZSDa005_Chr7_gene_195010_mRNA	Proximal
ZSDa005_Chr9_gene_27080_mRNA	Proximal
ZSDa005_Chr17_gene_57860_mRNA	Dispersed
ZSDa005_Chr8_gene_127600_mRNA	Tandem
ZSDa005_Chr2_gene_148590_mRNA	Proximal
ZSDa005_Chr13_gene_315630_mRNA	Tandem
ZSDa005_Chr5_gene_166670_mRNA	Dispersed
ZSDa005_Chr13_gene_294070_mRNA	Tandem
ZSDa005_Chr14_gene_177230_mRNA	Dispersed
ZSDa005_Chr5_gene_158700_mRNA	Dispersed
ZSDa005_Chr19_gene_238140_mRNA	Tandem
ZSDa005_Chr17_gene_64630_mRNA	Proximal
ZSDa005_Chr17_gene_65960_mRNA	Proximal
ZSDa005_Chr8_gene_130420_mRNA	Proximal
ZSDa005_Chr19_gene_250340_mRNA	Tandem
ZSDa005_Chr16_gene_288030_mRNA	WGD/SD
ZSDa005_Chr19_gene_248670_mRNA	Dispersed
ZSDa005_Chr16_gene_277530_mRNA	Tandem
ZSDa005_Chr19_gene_241820_mRNA	WGD/SD
ZSDa005_Chr5_gene_93480_mRNA	Proximal
ZSDa005_Chr5_gene_95580_mRNA	Dispersed
ZSDa005_Chr15_gene_261970_mRNA	Dispersed
ZSDa005_Chr15_gene_269400_mRNA	Proximal
ZSDa005_Chr20_gene_113010_mRNA	Dispersed
ZSDa005_Chr20_gene_106390_mRNA	WGD/SD
ZSDa005_Chr2_gene_144090_mRNA	Proximal
ZSDa005_Chr8_gene_127260_mRNA	Tandem
ZSDa005_Chr19_gene_245020_mRNA	Dispersed
ZSDa005_Chr2_gene_152350_mRNA	Proximal
ZSDa005_Chr5_gene_167160_mRNA	WGD/SD
ZSDa005_Chr5_gene_89710_mRNA	Proximal
ZSDa005_Chr16_gene_289450_mRNA	Tandem
ZSDa005_Chr13_gene_294150_mRNA	Proximal
ZSDa005_Chr13_gene_294090_mRNA	Tandem
ZSDa005_Chr5_gene_97330_mRNA	Tandem
ZSDa005_Chr16_gene_289410_mRNA	Tandem
ZSDa005_Chr4_gene_5410_mRNA	Proximal
ZSDa005_Chr17_gene_57070_mRNA	Tandem
ZSDa005_Chr5_gene_96990_mRNA	WGD/SD
ZSDa005_Chr2_gene_152500_mRNA	Proximal
ZSDa005_Chr3_gene_327030_mRNA	WGD/SD
ZSDa005_Chr15_gene_267450_mRNA	Tandem
ZSDa005_Chr17_gene_56450_mRNA	Dispersed
ZSDa005_Chr11_gene_220580_mRNA	WGD/SD
ZSDa005_Chr8_gene_130480_mRNA	Tandem
ZSDa005_Chr19_gene_244820_mRNA	Dispersed
ZSDa005_Chr5_gene_162810_mRNA	WGD/SD
ZSDa005_Chr8_gene_127280_mRNA	WGD/SD
ZSDa005_Chr5_gene_158710_mRNA	Dispersed
ZSDa005_Chr16_gene_289490_mRNA	Tandem
ZSDa005_Chr10_gene_46140_mRNA	Dispersed
ZSDa005_Chr4_gene_20240_mRNA	Tandem
ZSDa005_Chr2_gene_152390_mRNA	Proximal
ZSDa005_Chr19_gene_241750_mRNA	Dispersed
ZSDa005_Chr20_gene_107150_mRNA	Tandem
ZSDa005_Chr5_gene_102180_mRNA	Dispersed
ZSDa005_Chr20_gene_107160_mRNA	Tandem
ZSDa005_Chr8_gene_117060_mRNA	WGD/SD
ZSDa005_Chr14_gene_173480_mRNA	Dispersed
ZSDa005_Chr20_gene_107110_mRNA	Tandem
ZSDa005_Chr20_gene_107030_mRNA	Tandem
ZSDa005_Chr5_gene_164290_mRNA	Dispersed
ZSDa005_Chr5_gene_162310_mRNA	WGD/SD
ZSDa005_Chr5_gene_160860_mRNA	Dispersed
ZSDa005_Chr13_gene_294220_mRNA	Proximal
ZSDa005_Chr15_gene_270430_mRNA	Tandem
ZSDa005_Chr17_gene_65940_mRNA	Tandem
ZSDa005_Chr15_gene_270440_mRNA	Tandem
ZSDa005_Chr18_gene_72200_mRNA	Dispersed
ZSDa005_Chr7_gene_198230_mRNA	Tandem
ZSDa005_Chr19_gene_250860_mRNA	Dispersed
ZSDa005_Chr16_gene_289430_mRNA	Tandem
ZSDa005_Chr15_gene_260340_mRNA	Tandem
ZSDa005_Chr7_gene_198480_mRNA	Tandem
ZSDa005_Chr15_gene_260420_mRNA	Tandem
ZSDa005_Chr15_gene_263580_mRNA	Dispersed
ZSDa005_Chr2_gene_152140_mRNA	Proximal
ZSDa005_Chr14_gene_186040_mRNA	Dispersed
ZSDa005_Chr4_gene_6150_mRNA	WGD/SD
ZSDa005_Chr13_gene_316100_mRNA	Tandem
ZSDa005_Chr8_gene_131720_mRNA	Dispersed
ZSDa005_Chr5_gene_95180_mRNA	WGD/SD
ZSDa005_Chr13_gene_294180_mRNA	Proximal
ZSDa005_Chr2_gene_144080_mRNA	Tandem
ZSDa005_Chr15_gene_275770_mRNA	Dispersed
ZSDa005_Chr7_gene_204620_mRNA	Tandem
ZSDa005_Chr14_gene_183460_mRNA	WGD/SD
ZSDa005_Chr15_gene_269220_mRNA	Proximal
ZSDa005_Chr14_gene_177870_mRNA	Dispersed
ZSDa005_Chr4_gene_2360_mRNA	Dispersed
ZSDa005_Chr15_gene_267220_mRNA	Proximal
ZSDa005_Chr8_gene_121750_mRNA	Proximal
ZSDa005_Chr15_gene_265990_mRNA	Dispersed
ZSDa005_Chr2_gene_152170_mRNA	Proximal
ZSDa005_Chr7_gene_187560_mRNA	WGD/SD
ZSDa005_Chr20_gene_112960_mRNA	Dispersed
ZSDa005_Chr2_gene_144060_mRNA	Dispersed
ZSDa005_Chr18_gene_74190_mRNA	WGD/SD
ZSDa005_Chr8_gene_127190_mRNA	WGD/SD
ZSDa005_Chr10_gene_44540_mRNA	Dispersed
ZSDa005_Chr8_gene_127560_mRNA	Tandem
ZSDa005_Chr15_gene_261740_mRNA	Tandem
ZSDa005_Chr8_gene_127570_mRNA	Tandem
ZSDa005_Chr5_gene_164150_mRNA	Dispersed
ZSDa005_Chr4_gene_1440_mRNA	Dispersed
ZSDa005_Chr5_gene_163510_mRNA	Dispersed
ZSDa005_Chr5_gene_160480_mRNA	Dispersed
ZSDa005_Chr16_gene_289360_mRNA	Tandem
ZSDa005_Chr16_gene_285470_mRNA	Dispersed
ZSDa005_Chr5_gene_91900_mRNA	WGD/SD
ZSDa005_Chr14_gene_176700_mRNA	Dispersed
ZSDa005_Chr17_gene_56640_mRNA	Proximal
ZSDa005_Chr7_gene_197090_mRNA	WGD/SD
ZSDa005_Chr5_gene_96250_mRNA	Dispersed
ZSDa005_Chr2_gene_152260_mRNA	Proximal
ZSDa005_Chr20_gene_107660_mRNA	Dispersed
ZSDa005_Chr4_gene_7240_mRNA	WGD/SD
ZSDa005_Chr7_gene_187570_mRNA	Tandem
ZSDa005_Chr8_gene_118080_mRNA	WGD/SD
ZSDa005_Chr16_gene_285490_mRNA	Dispersed
ZSDa005_Chr12_gene_233050_mRNA	Tandem
ZSDa005_Chr15_gene_275550_mRNA	Proximal
ZSDa005_Chr11_gene_221510_mRNA	Dispersed
ZSDa005_Chr15_gene_267500_mRNA	Tandem
ZSDa005_Chr5_gene_89280_mRNA	Dispersed
ZSDa005_Chr11_gene_221760_mRNA	WGD/SD
ZSDa005_Chr19_gene_242380_mRNA	Dispersed
ZSDa005_Chr7_gene_199620_mRNA	Dispersed
ZSDa005_Chr15_gene_269380_mRNA	Proximal
ZSDa005_Chr20_gene_111360_mRNA	Dispersed
ZSDa005_Chr15_gene_267350_mRNA	Tandem
ZSDa005_Chr8_gene_127250_mRNA	Tandem
ZSDa005_Chr16_gene_282640_mRNA	Proximal
ZSDa005_Chr20_gene_113840_mRNA	WGD/SD
ZSDa005_Chr9_gene_22310_mRNA	Dispersed
ZSDa005_Chr11_gene_212290_mRNA	Dispersed
ZSDa005_Chr2_gene_145230_mRNA	Dispersed
ZSDa005_Chr2_gene_144620_mRNA	Tandem
ZSDa005_Chr13_gene_294270_mRNA	Proximal
ZSDa005_Chr2_gene_140800_mRNA	Dispersed
ZSDa005_Chr7_gene_189090_mRNA	Dispersed
ZSDa005_Chr9_gene_31920_mRNA	Dispersed
ZSDa005_Chr5_gene_97460_mRNA	WGD/SD
ZSDa005_Chr15_gene_269370_mRNA	Proximal
ZSDa005_Chr15_gene_267250_mRNA	Proximal
ZSDa005_Chr17_gene_66570_mRNA	Proximal
ZSDa005_Chr15_gene_260480_mRNA	Tandem
ZSDa005_Chr3_gene_325690_mRNA	Dispersed
ZSDa005_Chr3_gene_330290_mRNA	Dispersed
ZSDa005_Chr8_gene_121790_mRNA	Proximal
ZSDa005_Chr4_gene_11120_mRNA	Tandem
ZSDa005_Chr15_gene_267230_mRNA	Proximal
ZSDa005_Chr17_gene_56430_mRNA	Dispersed
ZSDa005_Chr1_gene_342360_mRNA	WGD/SD
ZSDa005_Chr18_gene_80940_mRNA	WGD/SD
ZSDa005_Chr15_gene_260330_mRNA	Tandem
ZSDa005_Chr15_gene_262570_mRNA	Dispersed
ZSDa005_Chr17_gene_60400_mRNA	WGD/SD
ZSDa005_Chr15_gene_275500_mRNA	Tandem
ZSDa005_Chr10_gene_36990_mRNA	Dispersed
ZSDa005_Chr19_gene_248910_mRNA	Tandem
ZSDa005_Chr2_gene_145860_mRNA	Dispersed
ZSDa005_Chr14_gene_177570_mRNA	WGD/SD
ZSDa005_Chr15_gene_260700_mRNA	Tandem
ZSDa005_Chr8_gene_135210_mRNA	Dispersed
ZSDa005_Chr13_gene_294040_mRNA	Proximal
ZSDa005_Chr2_gene_137220_mRNA	WGD/SD
ZSDa005_Chr9_gene_22350_mRNA	WGD/SD
ZSDa005_Chr15_gene_261920_mRNA	Dispersed
ZSDa005_Chr8_gene_127520_mRNA	Proximal
ZSDa005_Chr15_gene_260370_mRNA	WGD/SD
ZSDa005_Chr2_gene_152310_mRNA	Proximal
ZSDa005_Chr5_gene_102240_mRNA	Tandem
ZSDa005_Chr3_gene_319880_mRNA	WGD/SD
ZSDa005_Chr4_gene_12920_mRNA	WGD/SD
ZSDa005_Chr10_gene_38120_mRNA	Dispersed
ZSDa005_Chr15_gene_267400_mRNA	Dispersed
ZSDa005_Chr14_gene_177420_mRNA	Dispersed
ZSDa005_Chr5_gene_102210_mRNA	Proximal
ZSDa005_Chr8_gene_125840_mRNA	Dispersed
ZSDa005_Chr17_gene_53500_mRNA	WGD/SD
ZSDa005_Chr8_gene_125850_mRNA	Proximal
ZSDa005_Chr15_gene_266840_mRNA	Dispersed
ZSDa005_Chr8_gene_122010_mRNA	Dispersed
ZSDa005_Chr19_gene_241880_mRNA	Proximal
ZSDa005_Chr13_gene_294190_mRNA	Proximal
ZSDa005_Chr17_gene_59920_mRNA	Dispersed
ZSDa005_Chr5_gene_93270_mRNA	Dispersed
ZSDa005_Chr5_gene_90390_mRNA	Tandem
ZSDa005_Chr8_gene_130500_mRNA	Tandem
ZSDa005_Chr4_gene_16270_mRNA	Tandem
ZSDa005_Chr8_gene_117100_mRNA	WGD/SD
ZSDa005_Chr9_gene_34710_mRNA	WGD/SD
ZSDa005_Chr8_gene_135770_mRNA	Tandem
ZSDa005_Chr11_gene_221080_mRNA	Dispersed
ZSDa005_Chr1_gene_347340_mRNA	Dispersed
ZSDa005_Chr8_gene_128690_mRNA	Dispersed
ZSDa005_Chr14_gene_178330_mRNA	Dispersed
ZSDa005_Chr5_gene_158850_mRNA	Dispersed
ZSDa005_Chr15_gene_273440_mRNA	Dispersed
ZSDa005_Chr9_gene_33990_mRNA	WGD/SD
ZSDa005_Chr15_gene_275540_mRNA	Proximal
ZSDa005_Chr2_gene_148570_mRNA	WGD/SD
ZSDa005_Chr15_gene_260710_mRNA	Tandem
ZSDa005_Chr2_gene_148670_mRNA	Dispersed
ZSDa005_Chr8_gene_126960_mRNA	Dispersed
ZSDa005_Chr16_gene_282560_mRNA	Dispersed
ZSDa005_Chr15_gene_270700_mRNA	Dispersed
ZSDa005_Chr8_gene_127580_mRNA	Tandem
ZSDa005_Chr15_gene_269420_mRNA	WGD/SD
ZSDa005_Chr13_gene_295380_mRNA	Dispersed
ZSDa005_Chr14_gene_175130_mRNA	Dispersed
ZSDa005_Chr13_gene_294080_mRNA	Tandem
ZSDa005_Chr8_gene_135730_mRNA	Tandem
ZSDa005_Chr2_gene_152480_mRNA	Proximal
ZSDa005_Chr12_gene_228460_mRNA	Dispersed
ZSDa005_Chr5_gene_96920_mRNA	Proximal
ZSDa005_Chr5_gene_160100_mRNA	WGD/SD
ZSDa005_Chr15_gene_267180_mRNA	Proximal
ZSDa005_Chr15_gene_269390_mRNA	Proximal
ZSDa005_Chr9_gene_28000_mRNA	Dispersed
ZSDa005_Chr2_gene_152300_mRNA	Proximal
ZSDa005_Chr15_gene_267260_mRNA	Proximal
ZSDa005_Chr4_gene_20230_mRNA	Tandem
ZSDa005_Chr15_gene_267300_mRNA	Proximal
ZSDa005_Chr8_gene_133930_mRNA	Dispersed
ZSDa005_Chr7_gene_198470_mRNA	Tandem
ZSDa005_Chr15_gene_275520_mRNA	Tandem
ZSDa005_Chr15_gene_267210_mRNA	Proximal
ZSDa005_Chr8_gene_117070_mRNA	Tandem
ZSDa005_Chr17_gene_53570_mRNA	WGD/SD
ZSDa005_Chr2_gene_152250_mRNA	Proximal
ZSDa005_Chr9_gene_27070_mRNA	WGD/SD
ZSDa005_Chr4_gene_5690_mRNA	Dispersed
ZSDa005_Chr4_gene_1370_mRNA	WGD/SD
ZSDa005_Chr9_gene_24890_mRNA	WGD/SD
ZSDa005_Chr8_gene_124250_mRNA	Dispersed
ZSDa005_Chr5_gene_159120_mRNA	Dispersed
ZSDa005_Chr17_gene_55030_mRNA	Dispersed
ZSDa005_Chr18_gene_80490_mRNA	Proximal
ZSDa005_Chr3_gene_329770_mRNA	WGD/SD
ZSDa005_Chr19_gene_235860_mRNA	WGD/SD
ZSDa005_Chr17_gene_63740_mRNA	Dispersed
ZSDa005_Chr8_gene_123970_mRNA	Dispersed
ZSDa005_Chr15_gene_269410_mRNA	Proximal
ZSDa005_Chr11_gene_212520_mRNA	Dispersed
ZSDa005_Chr2_gene_145740_mRNA	WGD/SD
ZSDa005_Chr5_gene_163790_mRNA	Dispersed
ZSDa005_Chr15_gene_261900_mRNA	Tandem
ZSDa005_Chr2_gene_152470_mRNA	Proximal
ZSDa005_Chr8_gene_130510_mRNA	Tandem
ZSDa005_Chr15_gene_263600_mRNA	Dispersed
ZSDa005_Chr13_gene_294240_mRNA	Proximal
ZSDa005_Chr18_gene_70230_mRNA	Dispersed
ZSDa005_Chr1_gene_339050_mRNA	Dispersed
ZSDa005_Chr7_gene_198490_mRNA	Tandem
ZSDa005_Chr4_gene_19290_mRNA	Dispersed
ZSDa005_Chr11_gene_213620_mRNA	Dispersed
ZSDa005_Chr12_gene_232840_mRNA	Tandem
ZSDa005_Chr2_gene_152380_mRNA	Proximal
ZSDa005_Chr16_gene_289480_mRNA	Tandem
ZSDa005_Chr2_gene_149890_mRNA	Dispersed
ZSDa005_Chr19_gene_240670_mRNA	WGD/SD
ZSDa005_Chr16_gene_277520_mRNA	Tandem
ZSDa005_Chr15_gene_267360_mRNA	Tandem
ZSDa005_Chr12_gene_227180_mRNA	WGD/SD
ZSDa005_Chr14_gene_180130_mRNA	Tandem
ZSDa005_Chr19_gene_248920_mRNA	Tandem
ZSDa005_Chr5_gene_90400_mRNA	Tandem
ZSDa005_Chr15_gene_271820_mRNA	WGD/SD
ZSDa005_Chr17_gene_51640_mRNA	Dispersed
ZSDa005_Chr13_gene_293980_mRNA	WGD/SD
ZSDa005_Chr8_gene_130090_mRNA	Dispersed
ZSDa005_Chr15_gene_274590_mRNA	WGD/SD
ZSDa005_Chr13_gene_294170_mRNA	Proximal
ZSDa005_Chr4_gene_12430_mRNA	Tandem
ZSDa005_Chr7_gene_194660_mRNA	Tandem
ZSDa005_Chr15_gene_275510_mRNA	Tandem
ZSDa005_Chr9_gene_26920_mRNA	WGD/SD
ZSDa005_Chr15_gene_260310_mRNA	WGD/SD
ZSDa005_Chr5_gene_156610_mRNA	WGD/SD
ZSDa005_Chr20_gene_110120_mRNA	Dispersed
ZSDa005_Chr19_gene_257440_mRNA	WGD/SD
ZSDa005_Chr15_gene_268800_mRNA	Dispersed
ZSDa005_Chr17_gene_64600_mRNA	Proximal
ZSDa005_Chr19_gene_253820_mRNA	Tandem
ZSDa005_Chr7_gene_196590_mRNA	Dispersed
ZSDa005_Chr7_gene_198510_mRNA	Proximal
ZSDa005_Chr8_gene_127630_mRNA	Proximal
ZSDa005_Chr8_gene_127290_mRNA	Tandem
ZSDa005_Chr10_gene_45680_mRNA	WGD/SD
ZSDa005_Chr15_gene_260400_mRNA	Tandem
ZSDa005_Chr19_gene_241910_mRNA	Proximal
ZSDa005_Chr8_gene_129050_mRNA	WGD/SD
ZSDa005_Chr15_gene_269190_mRNA	Tandem
ZSDa005_Chr4_gene_16430_mRNA	Dispersed
ZSDa005_Chr14_gene_180120_mRNA	Tandem
ZSDa005_Chr2_gene_145300_mRNA	Dispersed
ZSDa005_Chr14_gene_185410_mRNA	Dispersed
ZSDa005_Chr12_gene_232830_mRNA	Tandem
ZSDa005_Chr8_gene_125820_mRNA	WGD/SD
ZSDa005_Chr19_gene_237210_mRNA	Dispersed
ZSDa005_Chr5_gene_101980_mRNA	WGD/SD
ZSDa005_Chr14_gene_176560_mRNA	Dispersed
ZSDa005_Chr15_gene_260410_mRNA	Tandem
ZSDa005_Chr15_gene_269430_mRNA	Proximal
ZSDa005_Chr7_gene_189430_mRNA	WGD/SD
ZSDa005_Chr5_gene_99880_mRNA	WGD/SD
ZSDa005_Chr8_gene_130460_mRNA	Proximal
ZSDa005_Chr8_gene_120070_mRNA	WGD/SD
ZSDa005_Chr13_gene_294140_mRNA	Proximal
ZSDa005_Chr2_gene_152700_mRNA	Tandem
ZSDa005_Chr13_gene_293740_mRNA	Dispersed
ZSDa005_Chr17_gene_57060_mRNA	Proximal
ZSDa005_Chr17_gene_58850_mRNA	Tandem
ZSDa005_Chr16_gene_290500_mRNA	Dispersed
ZSDa005_Chr2_gene_144100_mRNA	Proximal
ZSDa005_Chr17_gene_66770_mRNA	Tandem
ZSDa005_Chr12_gene_232740_mRNA	Dispersed
ZSDa005_Chr16_gene_289420_mRNA	Proximal
ZSDa005_Chr7_gene_198220_mRNA	Tandem
ZSDa005_Chr4_gene_5450_mRNA	Proximal
ZSDa005_Chr15_gene_267520_mRNA	Proximal
ZSDa005_Chr14_gene_175050_mRNA	Dispersed
ZSDa005_Chr9_gene_25920_mRNA	Dispersed
ZSDa005_Chr13_gene_294100_mRNA	Tandem
ZSDa005_Chr16_gene_289350_mRNA	Tandem
ZSDa005_Chr13_gene_294060_mRNA	Tandem
ZSDa005_Chr15_gene_269460_mRNA	Proximal
ZSDa005_Chr17_gene_61140_mRNA	WGD/SD
ZSDa005_Chr4_gene_12420_mRNA	Tandem
ZSDa005_Chr8_gene_127590_mRNA	Tandem
ZSDa005_Chr14_gene_174480_mRNA	WGD/SD
ZSDa005_Chr15_gene_269200_mRNA	Tandem
ZSDa005_Chr15_gene_260440_mRNA	Tandem
ZSDa005_Chr5_gene_166330_mRNA	WGD/SD
ZSDa005_Chr5_gene_165780_mRNA	Dispersed
ZSDa005_Chr17_gene_60540_mRNA	Proximal
ZSDa005_Chr14_gene_185340_mRNA	Dispersed
ZSDa005_Chr2_gene_152210_mRNA	Proximal
ZSDa005_Chr2_gene_152400_mRNA	Proximal
ZSDa005_Chr15_gene_260460_mRNA	Tandem
ZSDa005_Chr2_gene_144050_mRNA	Proximal
ZSDa005_Chr6_gene_299050_mRNA	WGD/SD
ZSDa005_Chr20_gene_112800_mRNA	Dispersed
ZSDa005_Chr8_gene_127220_mRNA	Tandem
ZSDa005_Chr18_gene_83070_mRNA	Tandem
ZSDa005_Chr3_gene_324180_mRNA	Dispersed
ZSDa005_Chr3_gene_330180_mRNA	Dispersed
ZSDa005_Chr15_gene_266260_mRNA	Dispersed
ZSDa005_Chr19_gene_238130_mRNA	Tandem
ZSDa005_Chr20_gene_107020_mRNA	Tandem
ZSDa005_Chr10_gene_39760_mRNA	Dispersed
ZSDa005_Chr20_gene_107050_mRNA	Tandem
ZSDa005_Chr18_gene_76990_mRNA	Dispersed
ZSDa005_Chr5_gene_158460_mRNA	Dispersed
ZSDa005_Chr13_gene_294260_mRNA	Proximal
ZSDa005_Chr15_gene_275580_mRNA	Proximal
ZSDa005_Chr2_gene_152130_mRNA	Dispersed
ZSDa005_Chr4_gene_20260_mRNA	Tandem
ZSDa005_Chr13_gene_294120_mRNA	Tandem
ZSDa005_Chr15_gene_267340_mRNA	Proximal
ZSDa005_Chr5_gene_97320_mRNA	Tandem
ZSDa005_Chr17_gene_55140_mRNA	Dispersed
ZSDa005_Chr8_gene_135670_mRNA	WGD/SD
ZSDa005_Chr13_gene_294460_mRNA	Tandem
ZSDa005_Chr10_gene_50080_mRNA	Dispersed
ZSDa005_Chr8_gene_127620_mRNA	Tandem
ZSDa005_Chr15_gene_267470_mRNA	Proximal
ZSDa005_Chr17_gene_66730_mRNA	Proximal
ZSDa005_Chr12_gene_226310_mRNA	WGD/SD
ZSDa005_Chr18_gene_68460_mRNA	Dispersed
ZSDa005_Chr20_gene_112640_mRNA	Dispersed
ZSDa005_Chr15_gene_270410_mRNA	Dispersed
ZSDa005_Chr4_gene_20250_mRNA	Tandem
ZSDa005_Chr17_gene_64940_mRNA	Tandem
ZSDa005_Chr13_gene_294200_mRNA	Proximal
ZSDa005_Chr16_gene_284050_mRNA	WGD/SD
ZSDa005_Chr1_gene_341530_mRNA	Dispersed
ZSDa005_Chr20_gene_115070_mRNA	WGD/SD
ZSDa005_Chr5_gene_99260_mRNA	WGD/SD
ZSDa005_Chr8_gene_130400_mRNA	Proximal
ZSDa005_Chr7_gene_193800_mRNA	Dispersed
ZSDa005_Chr9_gene_27590_mRNA	WGD/SD
ZSDa005_Chr12_gene_222260_mRNA	WGD/SD
ZSDa005_Chr4_gene_11810_mRNA	WGD/SD
ZSDa005_Chr1_gene_335880_mRNA	Dispersed
ZSDa005_Chr10_gene_41310_mRNA	Dispersed
ZSDa005_Chr11_gene_211390_mRNA	Dispersed
ZSDa005_Chr4_gene_18550_mRNA	Tandem
ZSDa005_Chr10_gene_46150_mRNA	Dispersed
ZSDa005_Chr20_gene_103320_mRNA	Dispersed
ZSDa005_Chr17_gene_62720_mRNA	Dispersed
ZSDa005_Chr20_gene_115030_mRNA	Dispersed
ZSDa005_Chr7_gene_189670_mRNA	WGD/SD
ZSDa005_Chr7_gene_198200_mRNA	WGD/SD
ZSDa005_Chr6_gene_312290_mRNA	WGD/SD
ZSDa005_Chr15_gene_269180_mRNA	Tandem
ZSDa005_Chr15_gene_269440_mRNA	Tandem
ZSDa005_Chr5_gene_96930_mRNA	Tandem
ZSDa005_Chr15_gene_267440_mRNA	Proximal
ZSDa005_Chr15_gene_274690_mRNA	WGD/SD
ZSDa005_Chr17_gene_58990_mRNA	WGD/SD
ZSDa005_Chr15_gene_260380_mRNA	Tandem
ZSDa005_Chr17_gene_58080_mRNA	Dispersed
ZSDa005_Chr17_gene_66760_mRNA	Tandem
ZSDa005_Chr18_gene_76080_mRNA	Dispersed
ZSDa005_Chr17_gene_52220_mRNA	WGD/SD
ZSDa005_Chr10_gene_46960_mRNA	WGD/SD
ZSDa005_Chr13_gene_294230_mRNA	Proximal
ZSDa005_Chr17_gene_66540_mRNA	Proximal
ZSDa005_Chr2_gene_144600_mRNA	Tandem
ZSDa005_Chr5_gene_90110_mRNA	Tandem
ZSDa005_Chr3_gene_320940_mRNA	WGD/SD
ZSDa005_Chr7_gene_198530_mRNA	Proximal
ZSDa005_Chr13_gene_315640_mRNA	Tandem
ZSDa005_Chr12_gene_233060_mRNA	Tandem
ZSDa005_Chr5_gene_162350_mRNA	Proximal
ZSDa005_Chr20_gene_104410_mRNA	WGD/SD
ZSDa005_Chr13_gene_316090_mRNA	Tandem
ZSDa005_Chr3_gene_333020_mRNA	WGD/SD
ZSDa005_Chr17_gene_65870_mRNA	Dispersed
ZSDa005_Chr5_gene_162410_mRNA	Tandem
ZSDa005_Chr4_gene_12880_mRNA	Dispersed
ZSDa005_Chr19_gene_256090_mRNA	Dispersed
ZSDa005_Chr8_gene_136560_mRNA	WGD/SD
ZSDa005_Chr16_gene_286410_mRNA	Dispersed
ZSDa005_Chr13_gene_315830_mRNA	WGD/SD
ZSDa005_Chr13_gene_294130_mRNA	Proximal
ZSDa005_Chr12_gene_234410_mRNA	WGD/SD
ZSDa005_Chr7_gene_189030_mRNA	WGD/SD
ZSDa005_Chr9_gene_27140_mRNA	WGD/SD
ZSDa005_Chr19_gene_238100_mRNA	Tandem
ZSDa005_Chr13_gene_316120_mRNA	Tandem
ZSDa005_Chr5_gene_90730_mRNA	Dispersed
ZSDa005_Chr7_gene_206380_mRNA	Dispersed
ZSDa005_Chr12_gene_232850_mRNA	Tandem
ZSDa005_Chr18_gene_81940_mRNA	Dispersed
ZSDa005_Chr2_gene_137710_mRNA	Dispersed
ZSDa005_Chr15_gene_267390_mRNA	Proximal
ZSDa005_Chr13_gene_294160_mRNA	Proximal
ZSDa005_Chr2_gene_152730_mRNA	Proximal
ZSDa005_Chr3_gene_325730_mRNA	Dispersed
ZSDa005_Chr17_gene_56600_mRNA	Tandem
ZSDa005_Chr18_gene_83060_mRNA	Tandem
ZSDa005_Chr2_gene_142640_mRNA	Dispersed
ZSDa005_Chr15_gene_276070_mRNA	WGD/SD
ZSDa005_Chr17_gene_58020_mRNA	Proximal
ZSDa005_Chr18_gene_71990_mRNA	Dispersed
ZSDa005_Chr16_gene_285330_mRNA	WGD/SD
ZSDa005_Chr15_gene_267430_mRNA	Proximal
ZSDa005_Chr15_gene_267420_mRNA	Proximal
ZSDa005_Chr2_gene_153190_mRNA	Dispersed
ZSDa005_Chr5_gene_98320_mRNA	Dispersed
ZSDa005_Chr16_gene_289440_mRNA	Proximal
ZSDa005_Chr12_gene_233330_mRNA	WGD/SD
ZSDa005_Chr18_gene_68260_mRNA	WGD/SD
ZSDa005_Chr15_gene_261890_mRNA	WGD/SD
ZSDa005_Chr8_gene_120970_mRNA	WGD/SD
ZSDa005_Chr3_gene_320650_mRNA	Dispersed
ZSDa005_Chr8_gene_135760_mRNA	Tandem
ZSDa005_Chr2_gene_152510_mRNA	Proximal
ZSDa005_Chr7_gene_193790_mRNA	Dispersed
ZSDa005_Chr9_gene_25480_mRNA	Dispersed
ZSDa005_Chr17_gene_65950_mRNA	Dispersed
ZSDa005_Chr12_gene_232610_mRNA	WGD/SD
ZSDa005_Chr20_gene_107140_mRNA	Tandem
ZSDa005_Chr8_gene_120640_mRNA	WGD/SD
ZSDa005_Chr5_gene_159950_mRNA	WGD/SD
ZSDa005_Chr17_gene_60470_mRNA	Dispersed
ZSDa005_Chr4_gene_5380_mRNA	Proximal
ZSDa005_Chr2_gene_144070_mRNA	Tandem
ZSDa005_Chr15_gene_275490_mRNA	Tandem
ZSDa005_Chr20_gene_107010_mRNA	Tandem
ZSDa005_Chr9_gene_28420_mRNA	WGD/SD
ZSDa005_Chr19_gene_237290_mRNA	Dispersed
ZSDa005_Chr11_gene_212510_mRNA	Dispersed
ZSDa005_Chr19_gene_257430_mRNA	WGD/SD
ZSDa005_Chr19_gene_243580_mRNA	Dispersed
ZSDa005_Chr4_gene_5870_mRNA	Dispersed
ZSDa005_Chr14_gene_169280_mRNA	Dispersed
ZSDa005_Chr18_gene_83080_mRNA	WGD/SD
ZSDa005_Chr12_gene_232890_mRNA	WGD/SD
ZSDa005_Chr7_gene_198930_mRNA	WGD/SD
ZSDa005_Chr19_gene_238110_mRNA	Tandem
ZSDa005_Chr18_gene_75310_mRNA	Dispersed
ZSDa005_Chr15_gene_267190_mRNA	Proximal
ZSDa005_Chr8_gene_121650_mRNA	Proximal
ZSDa005_Chr8_gene_127610_mRNA	WGD/SD
ZSDa005_Chr5_gene_168240_mRNA	Dispersed
ZSDa005_Chr9_gene_28360_mRNA	Dispersed
ZSDa005_Chr16_gene_284630_mRNA	Dispersed
ZSDa005_Chr17_gene_53450_mRNA	Dispersed
ZSDa005_Chr7_gene_195000_mRNA	Proximal
ZSDa005_Chr5_gene_89730_mRNA	Proximal
ZSDa005_Chr19_gene_239070_mRNA	WGD/SD
ZSDa005_Chr8_gene_121770_mRNA	Proximal
ZSDa005_Chr8_gene_130410_mRNA	Proximal
ZSDa005_Chr5_gene_101620_mRNA	Dispersed
ZSDa005_Chr17_gene_58840_mRNA	Tandem
ZSDa005_Chr5_gene_96910_mRNA	Tandem
ZSDa005_Chr13_gene_316080_mRNA	Dispersed
ZSDa005_Chr15_gene_260470_mRNA	Tandem
ZSDa005_Chr15_gene_260720_mRNA	Tandem
ZSDa005_Chr1_gene_341540_mRNA	Dispersed
ZSDa005_Chr16_gene_278280_mRNA	Dispersed
ZSDa005_Chr13_gene_293290_mRNA	Dispersed
ZSDa005_Chr5_gene_90380_mRNA	Tandem
ZSDa005_Chr16_gene_289550_mRNA	Tandem
ZSDa005_Chr20_gene_107090_mRNA	Tandem
ZSDa005_Chr3_gene_329160_mRNA	Dispersed
ZSDa005_Chr9_gene_27230_mRNA	Dispersed
ZSDa005_Chr17_gene_56620_mRNA	Tandem
ZSDa005_Chr8_gene_135780_mRNA	Tandem
ZSDa005_Chr15_gene_267460_mRNA	Proximal
ZSDa005_Chr14_gene_180150_mRNA	Proximal
ZSDa005_Chr4_gene_15790_mRNA	Dispersed
ZSDa005_Chr15_gene_267490_mRNA	Tandem
ZSDa005_Chr17_gene_60580_mRNA	Proximal
ZSDa005_Chr4_gene_7540_mRNA	Tandem
ZSDa005_Chr17_gene_64930_mRNA	Tandem
ZSDa005_Chr15_gene_269170_mRNA	WGD/SD
ZSDa005_Chr15_gene_271240_mRNA	Dispersed
ZSDa005_Chr15_gene_260730_mRNA	Tandem
ZSDa005_Chr4_gene_4830_mRNA	Dispersed
ZSDa005_Chr3_gene_320950_mRNA	Tandem
ZSDa005_Chr14_gene_186370_mRNA	Dispersed
ZSDa005_Chr15_gene_269470_mRNA	Tandem
ZSDa005_Chr2_gene_142210_mRNA	Dispersed
ZSDa005_Chr17_gene_61480_mRNA	Dispersed
ZSDa005_Chr13_gene_294110_mRNA	Tandem
ZSDa005_Chr5_gene_93520_mRNA	Proximal
ZSDa005_Chr5_gene_102230_mRNA	Tandem
ZSDa005_Chr12_gene_233070_mRNA	Tandem
ZSDa005_Chr20_gene_113980_mRNA	WGD/SD
ZSDa005_Chr19_gene_257260_mRNA	Dispersed
ZSDa005_Chr4_gene_4580_mRNA	Dispersed
ZSDa005_Chr1_gene_340850_mRNA	WGD/SD
ZSDa005_Chr12_gene_227930_mRNA	WGD/SD
ZSDa005_Chr16_gene_278910_mRNA	Dispersed
ZSDa005_Chr9_gene_34310_mRNA	WGD/SD
ZSDa005_Chr17_gene_59470_mRNA	Dispersed
ZSDa005_Chr5_gene_168130_mRNA	Proximal
ZSDa005_Chr8_gene_130440_mRNA	Tandem
ZSDa005_Chr17_gene_57080_mRNA	Tandem
ZSDa005_Chr5_gene_99400_mRNA	Dispersed
ZSDa005_Chr5_gene_97310_mRNA	Proximal
ZSDa005_Chr4_gene_7190_mRNA	WGD/SD
ZSDa005_Chr17_gene_66690_mRNA	WGD/SD
ZSDa005_Chr20_gene_109930_mRNA	Dispersed
ZSDa005_Chr20_gene_109470_mRNA	WGD/SD
ZSDa005_Chr17_gene_66740_mRNA	Proximal
ZSDa005_Chr15_gene_273950_mRNA	Dispersed
ZSDa005_Chr5_gene_101490_mRNA	Dispersed
ZSDa005_Chr17_gene_60570_mRNA	WGD/SD
ZSDa005_Chr7_gene_200310_mRNA	Dispersed
ZSDa005_Chr18_gene_81540_mRNA	Dispersed
ZSDa005_Chr3_gene_321040_mRNA	Dispersed
ZSDa006_Chr17_gene_2423500_mRNA	Tandem
ZSDa006_Chr15_gene_2280300_mRNA	Dispersed
ZSDa006_Chr2_gene_0256800_mRNA	Dispersed
ZSDa006_Chr17_gene_2407600_mRNA	Tandem
ZSDa006_Chr12_gene_1774900_mRNA	Tandem
ZSDa006_Chr16_gene_2367700_mRNA	WGD/SD
ZSDa006_Chr15_gene_2247600_mRNA	Tandem
ZSDa006_Chr4_gene_0531700_mRNA	Tandem
ZSDa006_Chr13_gene_1817600_mRNA	Proximal
ZSDa006_Chr7_gene_1113100_mRNA	WGD/SD
ZSDa006_Chr17_gene_2477900_mRNA	Dispersed
ZSDa006_Chr13_gene_1816400_mRNA	Proximal
ZSDa006_Chr10_gene_1518200_mRNA	Dispersed
ZSDa006_Chr9_gene_1368200_mRNA	WGD/SD
ZSDa006_Chr15_gene_2232200_mRNA	Dispersed
ZSDa006_Chr5_gene_0823200_mRNA	WGD/SD
ZSDa006_Chr15_gene_2145700_mRNA	Proximal
ZSDa006_Chr8_gene_1158700_mRNA	Tandem
ZSDa006_Chr1_gene_0002500_mRNA	WGD/SD
ZSDa006_Chr20_gene_2983700_mRNA	WGD/SD
ZSDa006_Chr15_gene_2167400_mRNA	Dispersed
ZSDa006_Chr20_gene_2965700_mRNA	Dispersed
ZSDa006_Chr17_gene_2425200_mRNA	Dispersed
ZSDa006_Chr18_gene_2550900_mRNA	Dispersed
ZSDa006_Chr15_gene_2274600_mRNA	WGD/SD
ZSDa006_Chr12_gene_1804200_mRNA	WGD/SD
ZSDa006_Chr8_gene_1316700_mRNA	WGD/SD
ZSDa006_Chr4_gene_0545200_mRNA	WGD/SD
ZSDa006_Chr11_gene_1688300_mRNA	Dispersed
ZSDa006_Chr12_gene_1774600_mRNA	Proximal
ZSDa006_Chr15_gene_2147500_mRNA	Proximal
ZSDa006_Chr13_gene_1812000_mRNA	Tandem
ZSDa006_Chr13_gene_1817900_mRNA	Tandem
ZSDa006_Chr17_gene_2445700_mRNA	Tandem
ZSDa006_Chr18_gene_2551000_mRNA	Dispersed
ZSDa006_Chr12_gene_1781500_mRNA	WGD/SD
ZSDa006_Chr2_gene_0210300_mRNA	Dispersed
ZSDa006_Chr5_gene_0723500_mRNA	Dispersed
ZSDa006_Chr17_gene_2445600_mRNA	Tandem
ZSDa006_Chr5_gene_0843500_mRNA	Dispersed
ZSDa006_Chr8_gene_1230200_mRNA	Proximal
ZSDa006_Chr4_gene_0562800_mRNA	Tandem
ZSDa006_Chr2_gene_0241500_mRNA	Proximal
ZSDa006_Chr11_gene_1680600_mRNA	Dispersed
ZSDa006_Chr4_gene_0519700_mRNA	Dispersed
ZSDa006_Chr3_gene_0277400_mRNA	Dispersed
ZSDa006_Chr2_gene_0244600_mRNA	Proximal
ZSDa006_Chr12_gene_1779200_mRNA	Tandem
ZSDa006_Chr15_gene_2274700_mRNA	Tandem
ZSDa006_Chr1_gene_0044900_mRNA	WGD/SD
ZSDa006_Chr15_gene_2245500_mRNA	Dispersed
ZSDa006_Chr2_gene_0242800_mRNA	Proximal
ZSDa006_Chr4_gene_0491900_mRNA	Dispersed
ZSDa006_Chr20_gene_2921500_mRNA	Dispersed
ZSDa006_Chr5_gene_0806500_mRNA	WGD/SD
ZSDa006_Chr5_gene_0765500_mRNA	Dispersed
ZSDa006_Chr2_gene_0238200_mRNA	Tandem
ZSDa006_Chr13_gene_1818300_mRNA	Tandem
ZSDa006_Chr14_gene_2058000_mRNA	WGD/SD
ZSDa006_Chr8_gene_1312100_mRNA	Tandem
ZSDa006_Chr4_gene_0397000_mRNA	Tandem
ZSDa006_Chr8_gene_1312200_mRNA	Tandem
ZSDa006_Chr5_gene_0602600_mRNA	Proximal
ZSDa006_Chr15_gene_2251600_mRNA	Tandem
ZSDa006_Chr2_gene_0237700_mRNA	Proximal
ZSDa006_Chr12_gene_1775600_mRNA	WGD/SD
ZSDa006_Chr15_gene_2247700_mRNA	Tandem
ZSDa006_Chr15_gene_2150300_mRNA	Tandem
ZSDa006_Chr13_gene_1817700_mRNA	Proximal
ZSDa006_Chr17_gene_2445900_mRNA	Tandem
ZSDa006_Chr14_gene_2107900_mRNA	Dispersed
ZSDa006_Chr16_gene_2329400_mRNA	WGD/SD
ZSDa006_Chr16_gene_2396300_mRNA	WGD/SD
ZSDa006_Chr8_gene_1311700_mRNA	Proximal
ZSDa006_Chr19_gene_2799400_mRNA	Dispersed
ZSDa006_Chr15_gene_2269300_mRNA	Proximal
ZSDa006_Chr8_gene_1253400_mRNA	Proximal
ZSDa006_Chr16_gene_2384200_mRNA	Dispersed
ZSDa006_Chr9_gene_1376900_mRNA	Dispersed
ZSDa006_Chr15_gene_2273600_mRNA	Tandem
ZSDa006_Chr18_gene_2619500_mRNA	WGD/SD
ZSDa006_Chr15_gene_2149500_mRNA	Proximal
ZSDa006_Chr5_gene_0747700_mRNA	WGD/SD
ZSDa006_Chr2_gene_0238600_mRNA	Proximal
ZSDa006_Chr4_gene_0481100_mRNA	Dispersed
ZSDa006_Chr2_gene_0181400_mRNA	WGD/SD
ZSDa006_Chr18_gene_2567500_mRNA	Dispersed
ZSDa006_Chr8_gene_1312600_mRNA	Tandem
ZSDa006_Chr15_gene_2268900_mRNA	Tandem
ZSDa006_Chr4_gene_0493000_mRNA	Dispersed
ZSDa006_Chr3_gene_0326300_mRNA	Dispersed
ZSDa006_Chr8_gene_1228700_mRNA	Proximal
ZSDa006_Chr5_gene_0758700_mRNA	Dispersed
ZSDa006_Chr8_gene_1158900_mRNA	Tandem
ZSDa006_Chr20_gene_2924400_mRNA	Tandem
ZSDa006_Chr16_gene_2390500_mRNA	Tandem
ZSDa006_Chr8_gene_1187300_mRNA	Dispersed
ZSDa006_Chr5_gene_0744400_mRNA	WGD/SD
ZSDa006_Chr15_gene_2268600_mRNA	Tandem
ZSDa006_Chr14_gene_2104100_mRNA	Dispersed
ZSDa006_Chr6_gene_0958200_mRNA	WGD/SD
ZSDa006_Chr15_gene_2273900_mRNA	Tandem
ZSDa006_Chr18_gene_2587100_mRNA	Dispersed
ZSDa006_Chr4_gene_0433900_mRNA	WGD/SD
ZSDa006_Chr19_gene_2789300_mRNA	Dispersed
ZSDa006_Chr1_gene_0024800_mRNA	WGD/SD
ZSDa006_Chr20_gene_2984700_mRNA	Tandem
ZSDa006_Chr19_gene_2798200_mRNA	Tandem
ZSDa006_Chr7_gene_1134900_mRNA	WGD/SD
ZSDa006_Chr8_gene_1230600_mRNA	Proximal
ZSDa006_Chr7_gene_0971300_mRNA	WGD/SD
ZSDa006_Chr18_gene_2548100_mRNA	WGD/SD
ZSDa006_Chr16_gene_2363800_mRNA	Dispersed
ZSDa006_Chr2_gene_0243300_mRNA	Proximal
ZSDa006_Chr5_gene_0844100_mRNA	Tandem
ZSDa006_Chr8_gene_1290200_mRNA	Dispersed
ZSDa006_Chr17_gene_2537600_mRNA	Dispersed
ZSDa006_Chr15_gene_2147100_mRNA	Tandem
ZSDa006_Chr2_gene_0237900_mRNA	Dispersed
ZSDa006_Chr8_gene_1311900_mRNA	Tandem
ZSDa006_Chr8_gene_1160200_mRNA	WGD/SD
ZSDa006_Chr3_gene_0376100_mRNA	Dispersed
ZSDa006_Chr19_gene_2853400_mRNA	Dispersed
ZSDa006_Chr5_gene_0697300_mRNA	Dispersed
ZSDa006_Chr15_gene_2268700_mRNA	Tandem
ZSDa006_Chr8_gene_1253300_mRNA	Proximal
ZSDa006_Chr5_gene_0753900_mRNA	Dispersed
ZSDa006_Chr14_gene_2120900_mRNA	WGD/SD
ZSDa006_Chr19_gene_2891800_mRNA	Tandem
ZSDa006_Chr10_gene_1532900_mRNA	Dispersed
ZSDa006_Chr2_gene_0240800_mRNA	Proximal
ZSDa006_Chr12_gene_1806400_mRNA	WGD/SD
ZSDa006_Chr5_gene_0677200_mRNA	Dispersed
ZSDa006_Chr13_gene_1820400_mRNA	Dispersed
ZSDa006_Chr5_gene_0814000_mRNA	WGD/SD
ZSDa006_Chr10_gene_1532600_mRNA	Dispersed
ZSDa006_Chr5_gene_0713900_mRNA	Dispersed
ZSDa006_Chr13_gene_1812400_mRNA	Tandem
ZSDa006_Chr12_gene_1700100_mRNA	Dispersed
ZSDa006_Chr19_gene_2736200_mRNA	WGD/SD
ZSDa006_Chr8_gene_1317200_mRNA	Tandem
ZSDa006_Chr8_gene_1318000_mRNA	WGD/SD
ZSDa006_Chr8_gene_1317100_mRNA	WGD/SD
ZSDa006_Chr20_gene_2984900_mRNA	Tandem
ZSDa006_Chr5_gene_0603000_mRNA	Proximal
ZSDa006_Chr15_gene_2147200_mRNA	Tandem
ZSDa006_Chr4_gene_0488600_mRNA	Tandem
ZSDa006_Chr2_gene_0139100_mRNA	Dispersed
ZSDa006_Chr15_gene_2273700_mRNA	Tandem
ZSDa006_Chr5_gene_0670400_mRNA	Dispersed
ZSDa006_Chr8_gene_1312300_mRNA	WGD/SD
ZSDa006_Chr5_gene_0832800_mRNA	Dispersed
ZSDa006_Chr15_gene_2147400_mRNA	Proximal
ZSDa006_Chr5_gene_0737900_mRNA	Proximal
ZSDa006_Chr8_gene_1225100_mRNA	Dispersed
ZSDa006_Chr20_gene_3013500_mRNA	Dispersed
ZSDa006_Chr9_gene_1417400_mRNA	WGD/SD
ZSDa006_Chr2_gene_0238300_mRNA	Tandem
ZSDa006_Chr5_gene_0656400_mRNA	Dispersed
ZSDa006_Chr5_gene_0745000_mRNA	Tandem
ZSDa006_Chr2_gene_0249800_mRNA	Proximal
ZSDa006_Chr15_gene_2234800_mRNA	Dispersed
ZSDa006_Chr17_gene_2506300_mRNA	WGD/SD
ZSDa006_Chr15_gene_2172200_mRNA	Dispersed
ZSDa006_Chr9_gene_1419100_mRNA	Dispersed
ZSDa006_Chr13_gene_1816800_mRNA	Proximal
ZSDa006_Chr8_gene_1297400_mRNA	WGD/SD
ZSDa006_Chr15_gene_2146900_mRNA	Tandem
ZSDa006_Chr16_gene_2379100_mRNA	Dispersed
ZSDa006_Chr14_gene_2114600_mRNA	Dispersed
ZSDa006_Chr7_gene_1098900_mRNA	Dispersed
ZSDa006_Chr5_gene_0683200_mRNA	WGD/SD
ZSDa006_Chr13_gene_1816500_mRNA	Proximal
ZSDa006_Chr17_gene_2529100_mRNA	Dispersed
ZSDa006_Chr17_gene_2406800_mRNA	WGD/SD
ZSDa006_Chr2_gene_0137200_mRNA	Dispersed
ZSDa006_Chr9_gene_1409700_mRNA	WGD/SD
ZSDa006_Chr15_gene_2213100_mRNA	Dispersed
ZSDa006_Chr17_gene_2507100_mRNA	Dispersed
ZSDa006_Chr9_gene_1428200_mRNA	WGD/SD
ZSDa006_Chr18_gene_2675800_mRNA	WGD/SD
ZSDa006_Chr8_gene_1317400_mRNA	Tandem
ZSDa006_Chr17_gene_2423400_mRNA	Tandem
ZSDa006_Chr2_gene_0183100_mRNA	Dispersed
ZSDa006_Chr18_gene_2675500_mRNA	Proximal
ZSDa006_Chr1_gene_0095100_mRNA	Dispersed
ZSDa006_Chr14_gene_1995800_mRNA	Proximal
ZSDa006_Chr5_gene_0616400_mRNA	WGD/SD
ZSDa006_Chr14_gene_2117800_mRNA	Dispersed
ZSDa006_Chr14_gene_2062800_mRNA	WGD/SD
ZSDa006_Chr4_gene_0420300_mRNA	Dispersed
ZSDa006_Chr10_gene_1498200_mRNA	Dispersed
ZSDa006_Chr5_gene_0594000_mRNA	Dispersed
ZSDa006_Chr11_gene_1653300_mRNA	Dispersed
ZSDa006_Chr17_gene_2451400_mRNA	Proximal
ZSDa006_Chr4_gene_0441000_mRNA	Dispersed
ZSDa006_Chr15_gene_2268300_mRNA	Tandem
ZSDa006_Chr8_gene_1253600_mRNA	Proximal
ZSDa006_Chr5_gene_0681100_mRNA	WGD/SD
ZSDa006_Chr5_gene_0622200_mRNA	Dispersed
ZSDa006_Chr17_gene_2424000_mRNA	Tandem
ZSDa006_Chr5_gene_0785500_mRNA	WGD/SD
ZSDa006_Chr10_gene_1522500_mRNA	WGD/SD
ZSDa006_Chr19_gene_2817200_mRNA	WGD/SD
ZSDa006_Chr9_gene_1324800_mRNA	WGD/SD
ZSDa006_Chr18_gene_2684300_mRNA	Dispersed
ZSDa006_Chr5_gene_0789400_mRNA	Dispersed
ZSDa006_Chr13_gene_1819300_mRNA	Proximal
ZSDa006_Chr17_gene_2518700_mRNA	Proximal
ZSDa006_Chr4_gene_0545300_mRNA	Dispersed
ZSDa006_Chr14_gene_2044200_mRNA	Dispersed
ZSDa006_Chr15_gene_2175400_mRNA	Dispersed
ZSDa006_Chr7_gene_1013500_mRNA	Proximal
ZSDa006_Chr17_gene_2422500_mRNA	Dispersed
ZSDa006_Chr15_gene_2273300_mRNA	Tandem
ZSDa006_Chr8_gene_1321600_mRNA	Dispersed
ZSDa006_Chr7_gene_1036900_mRNA	WGD/SD
ZSDa006_Chr1_gene_0030300_mRNA	Proximal
ZSDa006_Chr19_gene_2869800_mRNA	Tandem
ZSDa006_Chr19_gene_2869500_mRNA	Tandem
ZSDa006_Chr13_gene_1832200_mRNA	Dispersed
ZSDa006_Chr15_gene_2148200_mRNA	Proximal
ZSDa006_Chr12_gene_1785200_mRNA	WGD/SD
ZSDa006_Chr8_gene_1232500_mRNA	Proximal
ZSDa006_Chr7_gene_1132600_mRNA	Dispersed
ZSDa006_Chr15_gene_2275300_mRNA	WGD/SD
ZSDa006_Chr5_gene_0663500_mRNA	Dispersed
ZSDa006_Chr13_gene_1859000_mRNA	Proximal
ZSDa006_Chr4_gene_0531800_mRNA	Tandem
ZSDa006_Chr14_gene_1959600_mRNA	Dispersed
ZSDa006_Chr7_gene_1013300_mRNA	WGD/SD
ZSDa006_Chr3_gene_0327900_mRNA	Dispersed
ZSDa006_Chr15_gene_2145300_mRNA	Tandem
ZSDa006_Chr13_gene_1818600_mRNA	Tandem
ZSDa006_Chr17_gene_2448500_mRNA	Dispersed
ZSDa006_Chr17_gene_2451000_mRNA	Proximal
ZSDa006_Chr7_gene_1121000_mRNA	WGD/SD
ZSDa006_Chr20_gene_2924500_mRNA	Tandem
ZSDa006_Chr3_gene_0308300_mRNA	Dispersed
ZSDa006_Chr16_gene_2390400_mRNA	Tandem
ZSDa006_Chr17_gene_2539300_mRNA	Dispersed
ZSDa006_Chr20_gene_3009000_mRNA	WGD/SD
ZSDa006_Chr8_gene_1158800_mRNA	Tandem
ZSDa006_Chr5_gene_0744600_mRNA	Proximal
ZSDa006_Chr14_gene_2074600_mRNA	Dispersed
ZSDa006_Chr16_gene_2366200_mRNA	Dispersed
ZSDa006_Chr2_gene_0181600_mRNA	Proximal
ZSDa006_Chr20_gene_2988100_mRNA	WGD/SD
ZSDa006_Chr5_gene_0615000_mRNA	Tandem
ZSDa006_Chr5_gene_0656300_mRNA	Dispersed
ZSDa006_Chr2_gene_0238400_mRNA	Proximal
ZSDa006_Chr12_gene_1779400_mRNA	Tandem
ZSDa006_Chr15_gene_2184700_mRNA	Dispersed
ZSDa006_Chr5_gene_0738200_mRNA	WGD/SD
ZSDa006_Chr8_gene_1312400_mRNA	Tandem
ZSDa006_Chr8_gene_1316800_mRNA	Tandem
ZSDa006_Chr17_gene_2408900_mRNA	Tandem
ZSDa006_Chr3_gene_0270100_mRNA	WGD/SD
ZSDa006_Chr17_gene_2463900_mRNA	Dispersed
ZSDa006_Chr13_gene_1818900_mRNA	Proximal
ZSDa006_Chr5_gene_0737700_mRNA	Tandem
ZSDa006_Chr2_gene_0126900_mRNA	Dispersed
ZSDa006_Chr9_gene_1383100_mRNA	Dispersed
ZSDa006_Chr17_gene_2500500_mRNA	Dispersed
ZSDa006_Chr4_gene_0410700_mRNA	WGD/SD
ZSDa006_Chr4_gene_0562700_mRNA	Tandem
ZSDa006_Chr9_gene_1411800_mRNA	WGD/SD
ZSDa006_Chr8_gene_1252700_mRNA	Proximal
ZSDa006_Chr14_gene_1995100_mRNA	Tandem
ZSDa006_Chr2_gene_0242000_mRNA	Proximal
ZSDa006_Chr2_gene_0244300_mRNA	Proximal
ZSDa006_Chr2_gene_0241100_mRNA	Dispersed
ZSDa006_Chr19_gene_2896000_mRNA	WGD/SD
ZSDa006_Chr1_gene_0013200_mRNA	Dispersed
ZSDa006_Chr15_gene_2147000_mRNA	Tandem
ZSDa006_Chr8_gene_1252000_mRNA	Tandem
ZSDa006_Chr19_gene_2736000_mRNA	WGD/SD
ZSDa006_Chr13_gene_1812500_mRNA	Tandem
ZSDa006_Chr5_gene_0798600_mRNA	WGD/SD
ZSDa006_Chr1_gene_0013100_mRNA	Dispersed
ZSDa006_Chr15_gene_2272900_mRNA	Tandem
ZSDa006_Chr2_gene_0242700_mRNA	Dispersed
ZSDa006_Chr15_gene_2247300_mRNA	Dispersed
ZSDa006_Chr12_gene_1790800_mRNA	WGD/SD
ZSDa006_Chr13_gene_1816200_mRNA	Proximal
ZSDa006_Chr18_gene_2649500_mRNA	Dispersed
ZSDa006_Chr13_gene_1817300_mRNA	Proximal
ZSDa006_Chr8_gene_1312500_mRNA	Tandem
ZSDa006_Chr17_gene_2480500_mRNA	Dispersed
ZSDa006_Chr4_gene_0418200_mRNA	WGD/SD
ZSDa006_Chr20_gene_2940200_mRNA	WGD/SD
ZSDa006_Chr9_gene_1401500_mRNA	WGD/SD
ZSDa006_Chr14_gene_1995200_mRNA	Tandem
ZSDa006_Chr19_gene_2797500_mRNA	Proximal
ZSDa006_Chr4_gene_0433100_mRNA	Dispersed
ZSDa006_Chr19_gene_2860600_mRNA	Dispersed
ZSDa006_Chr18_gene_2616200_mRNA	Dispersed
ZSDa006_Chr15_gene_2213600_mRNA	Dispersed
ZSDa006_Chr4_gene_0524500_mRNA	WGD/SD
ZSDa006_Chr8_gene_1282200_mRNA	WGD/SD
ZSDa006_Chr20_gene_2962800_mRNA	Dispersed
ZSDa006_Chr9_gene_1403000_mRNA	WGD/SD
ZSDa006_Chr14_gene_2114100_mRNA	Dispersed
ZSDa006_Chr13_gene_1812600_mRNA	Dispersed
ZSDa006_Chr8_gene_1252400_mRNA	Tandem
ZSDa006_Chr3_gene_0358600_mRNA	Dispersed
ZSDa006_Chr19_gene_2760100_mRNA	Dispersed
ZSDa006_Chr15_gene_2146200_mRNA	Proximal
ZSDa006_Chr14_gene_2093400_mRNA	Dispersed
ZSDa006_Chr4_gene_0396900_mRNA	Tandem
ZSDa006_Chr19_gene_2911900_mRNA	WGD/SD
ZSDa006_Chr5_gene_0610100_mRNA	Tandem
ZSDa006_Chr8_gene_1188400_mRNA	Dispersed
ZSDa006_Chr5_gene_0658700_mRNA	Dispersed
ZSDa006_Chr1_gene_0030700_mRNA	Proximal
ZSDa006_Chr19_gene_2842100_mRNA	WGD/SD
ZSDa006_Chr15_gene_2148700_mRNA	Proximal
ZSDa006_Chr15_gene_2274000_mRNA	WGD/SD
ZSDa006_Chr2_gene_0242400_mRNA	Proximal
ZSDa006_Chr9_gene_1398300_mRNA	WGD/SD
ZSDa006_Chr17_gene_2480600_mRNA	Dispersed
ZSDa006_Chr18_gene_2656900_mRNA	Dispersed
ZSDa006_Chr20_gene_2970100_mRNA	WGD/SD
ZSDa006_Chr2_gene_0146600_mRNA	Dispersed
ZSDa006_Chr4_gene_0424400_mRNA	Tandem
ZSDa006_Chr14_gene_2073200_mRNA	Dispersed
ZSDa006_Chr19_gene_2771500_mRNA	Dispersed
ZSDa006_Chr13_gene_1811900_mRNA	Tandem
ZSDa006_Chr8_gene_1243500_mRNA	WGD/SD
ZSDa006_Chr13_gene_1817000_mRNA	Proximal
ZSDa006_Chr2_gene_0245600_mRNA	Proximal
ZSDa006_Chr5_gene_0843800_mRNA	Tandem
ZSDa006_Chr4_gene_0522900_mRNA	WGD/SD
ZSDa006_Chr12_gene_1775000_mRNA	Tandem
ZSDa006_Chr5_gene_0847300_mRNA	WGD/SD
ZSDa006_Chr18_gene_2666200_mRNA	Dispersed
ZSDa006_Chr19_gene_2798300_mRNA	WGD/SD
ZSDa006_Chr4_gene_0562500_mRNA	Tandem
ZSDa006_Chr2_gene_0127800_mRNA	Dispersed
ZSDa006_Chr14_gene_2101600_mRNA	Dispersed
ZSDa006_Chr8_gene_1252500_mRNA	Tandem
ZSDa006_Chr15_gene_2148900_mRNA	Proximal
ZSDa006_Chr13_gene_1859300_mRNA	Proximal
ZSDa006_Chr3_gene_0285300_mRNA	WGD/SD
ZSDa006_Chr19_gene_2797700_mRNA	Proximal
ZSDa006_Chr17_gene_2505800_mRNA	WGD/SD
ZSDa006_Chr15_gene_2275000_mRNA	Tandem
ZSDa006_Chr11_gene_1629900_mRNA	Dispersed
ZSDa006_Chr13_gene_1818500_mRNA	Tandem
ZSDa006_Chr7_gene_1033500_mRNA	Dispersed
ZSDa006_Chr15_gene_2273400_mRNA	Tandem
ZSDa006_Chr20_gene_2921300_mRNA	Dispersed
ZSDa006_Chr15_gene_2148600_mRNA	Proximal
ZSDa006_Chr3_gene_0262300_mRNA	WGD/SD
ZSDa006_Chr2_gene_0249600_mRNA	Tandem
ZSDa006_Chr19_gene_2750600_mRNA	WGD/SD
ZSDa006_Chr4_gene_0424500_mRNA	Tandem
ZSDa006_Chr13_gene_1812700_mRNA	Proximal
ZSDa006_Chr7_gene_1135000_mRNA	Tandem
ZSDa006_Chr8_gene_1172100_mRNA	Dispersed
ZSDa006_Chr19_gene_2883800_mRNA	Dispersed
ZSDa006_Chr9_gene_1401700_mRNA	Proximal
ZSDa006_Chr7_gene_1111000_mRNA	Dispersed
ZSDa006_Chr11_gene_1647500_mRNA	Dispersed
ZSDa006_Chr5_gene_0768200_mRNA	Dispersed
ZSDa006_Chr4_gene_0476500_mRNA	Dispersed
ZSDa006_Chr8_gene_1312000_mRNA	WGD/SD
ZSDa006_Chr7_gene_1128300_mRNA	Tandem
ZSDa006_Chr15_gene_2150200_mRNA	Proximal
ZSDa006_Chr7_gene_1127800_mRNA	Tandem
ZSDa006_Chr8_gene_1233100_mRNA	Proximal
ZSDa006_Chr13_gene_1816700_mRNA	Proximal
ZSDa006_Chr15_gene_2145400_mRNA	Tandem
ZSDa006_Chr11_gene_1692200_mRNA	WGD/SD
ZSDa006_Chr5_gene_0651700_mRNA	Dispersed
ZSDa006_Chr20_gene_2969300_mRNA	Dispersed
ZSDa006_Chr13_gene_1825200_mRNA	Dispersed
ZSDa006_Chr20_gene_2943200_mRNA	Dispersed
ZSDa006_Chr17_gene_2409000_mRNA	Tandem
ZSDa006_Chr7_gene_1128500_mRNA	Tandem
ZSDa006_Chr13_gene_1818200_mRNA	Tandem
ZSDa006_Chr17_gene_2517000_mRNA	WGD/SD
ZSDa006_Chr5_gene_0642700_mRNA	Dispersed
ZSDa006_Chr8_gene_1228200_mRNA	Proximal
ZSDa006_Chr9_gene_1341600_mRNA	WGD/SD
ZSDa006_Chr15_gene_2268000_mRNA	Tandem
ZSDa006_Chr19_gene_2869900_mRNA	Tandem
ZSDa006_Chr12_gene_1779300_mRNA	Tandem
ZSDa006_Chr13_gene_1818100_mRNA	Tandem
ZSDa006_Chr8_gene_1252300_mRNA	Tandem
ZSDa006_Chr7_gene_1018900_mRNA	Tandem
ZSDa006_Chr9_gene_1425100_mRNA	WGD/SD
ZSDa006_Chr18_gene_2632100_mRNA	Proximal
ZSDa006_Chr15_gene_2221500_mRNA	WGD/SD
ZSDa006_Chr14_gene_2096800_mRNA	WGD/SD
ZSDa006_Chr19_gene_2869600_mRNA	Tandem
ZSDa006_Chr20_gene_2991700_mRNA	Dispersed
ZSDa006_Chr4_gene_0501500_mRNA	WGD/SD
ZSDa006_Chr1_gene_0031100_mRNA	Proximal
ZSDa006_Chr20_gene_2954300_mRNA	Dispersed
ZSDa006_Chr15_gene_2135500_mRNA	WGD/SD
ZSDa006_Chr15_gene_2269100_mRNA	WGD/SD
ZSDa006_Chr20_gene_2985000_mRNA	Tandem
ZSDa006_Chr17_gene_2527600_mRNA	WGD/SD
ZSDa006_Chr15_gene_2146500_mRNA	Tandem
ZSDa006_Chr5_gene_0646100_mRNA	WGD/SD
ZSDa006_Chr2_gene_0245100_mRNA	Proximal
ZSDa006_Chr8_gene_1316600_mRNA	WGD/SD
ZSDa006_Chr15_gene_2146800_mRNA	Tandem
ZSDa006_Chr5_gene_0794000_mRNA	WGD/SD
ZSDa006_Chr14_gene_2052200_mRNA	Dispersed
ZSDa006_Chr17_gene_2437600_mRNA	Proximal
ZSDa006_Chr5_gene_0830600_mRNA	Dispersed
ZSDa006_Chr5_gene_0844700_mRNA	Proximal
ZSDa006_Chr13_gene_1816900_mRNA	Proximal
ZSDa006_Chr15_gene_2274400_mRNA	Tandem
ZSDa006_Chr15_gene_2164500_mRNA	WGD/SD
ZSDa006_Chr17_gene_2425300_mRNA	Dispersed
ZSDa006_Chr16_gene_2299300_mRNA	WGD/SD
ZSDa006_Chr12_gene_1771100_mRNA	WGD/SD
ZSDa006_Chr4_gene_0436600_mRNA	Dispersed
ZSDa006_Chr11_gene_1669400_mRNA	WGD/SD
ZSDa006_Chr7_gene_1128400_mRNA	Tandem
ZSDa006_Chr17_gene_2504200_mRNA	WGD/SD
ZSDa006_Chr8_gene_1160000_mRNA	Tandem
ZSDa006_Chr18_gene_2675900_mRNA	WGD/SD
ZSDa006_Chr6_gene_0852100_mRNA	WGD/SD
ZSDa006_Chr5_gene_0844000_mRNA	Tandem
ZSDa006_Chr2_gene_0240500_mRNA	Dispersed
ZSDa006_Chr3_gene_0375300_mRNA	Dispersed
ZSDa006_Chr12_gene_1696900_mRNA	WGD/SD
ZSDa006_Chr8_gene_1158600_mRNA	Tandem
ZSDa006_Chr8_gene_1232000_mRNA	Proximal
ZSDa006_Chr8_gene_1318100_mRNA	Tandem
ZSDa006_Chr13_gene_1817400_mRNA	Proximal
ZSDa006_Chr19_gene_2870000_mRNA	Tandem
ZSDa006_Chr10_gene_1534800_mRNA	WGD/SD
ZSDa006_Chr8_gene_1190300_mRNA	WGD/SD
ZSDa006_Chr17_gene_2437900_mRNA	Proximal
ZSDa006_Chr13_gene_1816600_mRNA	Proximal
ZSDa006_Chr8_gene_1260300_mRNA	Dispersed
ZSDa006_Chr3_gene_0285400_mRNA	Tandem
ZSDa006_Chr8_gene_1161300_mRNA	WGD/SD
ZSDa006_Chr2_gene_0245400_mRNA	Proximal
ZSDa006_Chr1_gene_0116000_mRNA	Dispersed
ZSDa006_Chr16_gene_2349400_mRNA	Dispersed
ZSDa006_Chr5_gene_0729500_mRNA	Tandem
ZSDa006_Chr3_gene_0318400_mRNA	WGD/SD
ZSDa006_Chr5_gene_0840200_mRNA	WGD/SD
ZSDa006_Chr7_gene_1128200_mRNA	Tandem
ZSDa006_Chr2_gene_0243900_mRNA	Proximal
ZSDa006_Chr13_gene_1816300_mRNA	Proximal
ZSDa006_Chr13_gene_1817200_mRNA	Proximal
ZSDa006_Chr7_gene_1033600_mRNA	Dispersed
ZSDa006_Chr20_gene_2984800_mRNA	Tandem
ZSDa006_Chr9_gene_1404700_mRNA	Dispersed
ZSDa006_Chr19_gene_2740200_mRNA	Dispersed
ZSDa006_Chr2_gene_0249500_mRNA	Tandem
ZSDa006_Chr7_gene_1128100_mRNA	Tandem
ZSDa006_Chr13_gene_1817100_mRNA	Proximal
ZSDa006_Chr19_gene_2846400_mRNA	WGD/SD
ZSDa006_Chr15_gene_2146000_mRNA	Proximal
ZSDa006_Chr5_gene_0690900_mRNA	Dispersed
ZSDa006_Chr8_gene_1262100_mRNA	WGD/SD
ZSDa006_Chr17_gene_2437300_mRNA	WGD/SD
ZSDa006_Chr2_gene_0244800_mRNA	Proximal
ZSDa006_Chr8_gene_1231400_mRNA	Proximal
ZSDa006_Chr15_gene_2149700_mRNA	Tandem
ZSDa006_Chr15_gene_2158100_mRNA	Dispersed
ZSDa006_Chr5_gene_0798700_mRNA	WGD/SD
ZSDa006_Chr20_gene_3030400_mRNA	WGD/SD
ZSDa006_Chr11_gene_1675400_mRNA	Dispersed
ZSDa006_Chr4_gene_0562600_mRNA	Tandem
ZSDa006_Chr7_gene_1097900_mRNA	WGD/SD
ZSDa006_Chr15_gene_2274200_mRNA	Proximal
ZSDa006_Chr8_gene_1252600_mRNA	Tandem
ZSDa006_Chr15_gene_2275100_mRNA	Tandem
ZSDa006_Chr5_gene_0728700_mRNA	WGD/SD
ZSDa006_Chr18_gene_2639700_mRNA	WGD/SD
ZSDa006_Chr4_gene_0493400_mRNA	Dispersed
ZSDa006_Chr12_gene_1779600_mRNA	Proximal
ZSDa006_Chr12_gene_1773500_mRNA	Dispersed
ZSDa006_Chr5_gene_0737600_mRNA	Tandem
ZSDa006_Chr10_gene_1503600_mRNA	Dispersed
ZSDa006_Chr7_gene_0979400_mRNA	WGD/SD
ZSDa006_Chr19_gene_2788100_mRNA	WGD/SD
ZSDa006_Chr15_gene_2273500_mRNA	Tandem
ZSDa006_Chr20_gene_2969900_mRNA	Dispersed
ZSDa006_Chr15_gene_2243900_mRNA	Dispersed
ZSDa006_Chr2_gene_0249400_mRNA	Tandem
ZSDa006_Chr15_gene_2273800_mRNA	Tandem
ZSDa006_Chr15_gene_2149600_mRNA	Tandem
ZSDa006_Chr5_gene_0614900_mRNA	Tandem
ZSDa006_Chr17_gene_2408400_mRNA	WGD/SD
ZSDa006_Chr8_gene_1251900_mRNA	Tandem
ZSDa006_Chr12_gene_1769400_mRNA	WGD/SD
ZSDa006_Chr8_gene_1190600_mRNA	WGD/SD
ZSDa006_Chr15_gene_2248400_mRNA	Dispersed
ZSDa006_Chr14_gene_1961200_mRNA	Dispersed
ZSDa006_Chr8_gene_1159900_mRNA	Tandem
ZSDa006_Chr17_gene_2445100_mRNA	Proximal
ZSDa006_Chr10_gene_1549900_mRNA	WGD/SD
ZSDa006_Chr8_gene_1250200_mRNA	WGD/SD
ZSDa006_Chr17_gene_2411800_mRNA	Proximal
ZSDa006_Chr8_gene_1317800_mRNA	Proximal
ZSDa006_Chr19_gene_2885000_mRNA	Dispersed
ZSDa006_Chr15_gene_2275200_mRNA	Tandem
ZSDa006_Chr15_gene_2269400_mRNA	Dispersed
ZSDa006_Chr3_gene_0287400_mRNA	Dispersed
ZSDa006_Chr19_gene_2891700_mRNA	Tandem
ZSDa006_Chr17_gene_2411500_mRNA	Proximal
ZSDa006_Chr5_gene_0843900_mRNA	Tandem
ZSDa006_Chr10_gene_1545200_mRNA	Dispersed
ZSDa006_Chr15_gene_2150400_mRNA	Tandem
ZSDa006_Chr20_gene_3008300_mRNA	Dispersed
ZSDa006_Chr17_gene_2517800_mRNA	Proximal
ZSDa006_Chr11_gene_1653500_mRNA	WGD/SD
ZSDa006_Chr15_gene_2268100_mRNA	Tandem
ZSDa006_Chr18_gene_2659800_mRNA	WGD/SD
ZSDa006_Chr15_gene_2127200_mRNA	Dispersed
ZSDa006_Chr4_gene_0488800_mRNA	Tandem
ZSDa006_Chr15_gene_2148300_mRNA	Dispersed
ZSDa006_Chr8_gene_1234100_mRNA	Dispersed
ZSDa006_Chr15_gene_2140700_mRNA	Dispersed
ZSDa006_Chr17_gene_2445500_mRNA	Tandem
ZSDa006_Chr17_gene_2445800_mRNA	Tandem
ZSDa006_Chr7_gene_1018800_mRNA	Tandem
ZSDa006_Chr15_gene_2183400_mRNA	Dispersed
ZSDa006_Chr15_gene_2273200_mRNA	WGD/SD
ZSDa006_Chr20_gene_2985100_mRNA	Tandem
ZSDa006_Chr4_gene_0472700_mRNA	Dispersed
ZSDa006_Chr15_gene_2269000_mRNA	Tandem
ZSDa006_Chr17_gene_2448300_mRNA	Dispersed
ZSDa006_Chr5_gene_0738700_mRNA	WGD/SD
ZSDa006_Chr15_gene_2273100_mRNA	Tandem
ZSDa006_Chr2_gene_0243700_mRNA	Proximal
ZSDa006_Chr3_gene_0381100_mRNA	WGD/SD
ZSDa006_Chr20_gene_2983500_mRNA	Proximal
ZSDa006_Chr15_gene_2268200_mRNA	Tandem
ZSDa006_Chr17_gene_2408000_mRNA	Tandem
ZSDa006_Chr5_gene_0737100_mRNA	WGD/SD
ZSDa006_Chr7_gene_1127900_mRNA	Tandem
ZSDa006_Chr20_gene_2983800_mRNA	Tandem
ZSDa006_Chr15_gene_2251500_mRNA	Tandem
ZSDa006_Chr17_gene_2517200_mRNA	Proximal
ZSDa006_Chr5_gene_0615100_mRNA	Tandem
ZSDa006_Chr8_gene_1159000_mRNA	Tandem
ZSDa006_Chr14_gene_1950400_mRNA	Dispersed
ZSDa006_Chr13_gene_1821800_mRNA	Dispersed
ZSDa006_Chr5_gene_0706800_mRNA	WGD/SD
ZSDa006_Chr7_gene_1102800_mRNA	WGD/SD
ZSDa006_Chr4_gene_0489100_mRNA	Tandem
ZSDa006_Chr7_gene_1132900_mRNA	WGD/SD
ZSDa006_Chr15_gene_2247800_mRNA	Tandem
ZSDa006_Chr5_gene_0744900_mRNA	Tandem
ZSDa006_Chr17_gene_2423600_mRNA	Proximal
ZSDa006_Chr2_gene_0187200_mRNA	Dispersed
ZSDa006_Chr10_gene_1442900_mRNA	Dispersed
ZSDa006_Chr17_gene_2407500_mRNA	Tandem
ZSDa006_Chr13_gene_1817800_mRNA	Tandem
ZSDa006_Chr15_gene_2247500_mRNA	WGD/SD
ZSDa006_Chr17_gene_2407800_mRNA	Proximal
ZSDa006_Chr13_gene_1817500_mRNA	Proximal
ZSDa006_Chr20_gene_2984100_mRNA	Proximal
ZSDa006_Chr9_gene_1426700_mRNA	Dispersed
ZSDa006_Chr19_gene_2744900_mRNA	Dispersed
ZSDa006_Chr7_gene_0988500_mRNA	Dispersed
ZSDa006_Chr2_gene_0136100_mRNA	Dispersed
ZSDa006_Chr17_gene_2423900_mRNA	Tandem
ZSDa006_Chr3_gene_0341800_mRNA	Dispersed
ZSDa006_Chr9_gene_1371300_mRNA	Dispersed
ZSDa006_Chr8_gene_1144700_mRNA	WGD/SD
ZSDa006_Chr7_gene_1111800_mRNA	Dispersed
ZSDa006_Chr12_gene_1774800_mRNA	Tandem
ZSDa006_Chr4_gene_0495700_mRNA	Dispersed
ZSDa006_Chr15_gene_2162100_mRNA	WGD/SD
ZSDa006_Chr2_gene_0249300_mRNA	Tandem
ZSDa006_Chr5_gene_0765000_mRNA	Dispersed
ZSDa006_Chr7_gene_0985700_mRNA	Dispersed
ZSDa006_Chr2_gene_0214300_mRNA	Dispersed
ZSDa006_Chr15_gene_2274500_mRNA	Tandem
ZSDa015_Chr20_gene_203820_mRNA	WGD/SD
ZSDa015_Chr15_gene_165010_mRNA	Tandem
ZSDa015_Chr17_gene_326550_mRNA	Tandem
ZSDa015_Chr13_gene_260040_mRNA	Tandem
ZSDa015_Chr15_gene_163800_mRNA	Tandem
ZSDa015_Chr20_gene_214430_mRNA	Dispersed
ZSDa015_Chr5_gene_122580_mRNA	Dispersed
ZSDa015_Chr5_gene_127930_mRNA	Dispersed
ZSDa015_Chr17_gene_314720_mRNA	Dispersed
ZSDa015_Chr8_gene_48460_mRNA	Tandem
ZSDa015_Chr2_gene_4960_mRNA	Tandem
ZSDa015_Chr15_gene_157090_mRNA	Tandem
ZSDa015_Chr2_gene_12830_mRNA	Tandem
ZSDa015_Chr7_gene_280470_mRNA	Tandem
ZSDa015_Chr4_gene_178130_mRNA	Tandem
ZSDa015_Chr20_gene_211200_mRNA	WGD/SD
ZSDa015_Chr2_gene_5050_mRNA	Proximal
ZSDa015_Chr13_gene_252990_mRNA	Tandem
ZSDa015_Chr5_gene_110070_mRNA	WGD/SD
ZSDa015_Chr9_gene_337190_mRNA	WGD/SD
ZSDa015_Chr14_gene_87630_mRNA	Dispersed
ZSDa015_Chr9_gene_334340_mRNA	WGD/SD
ZSDa015_Chr3_gene_33040_mRNA	WGD/SD
ZSDa015_Chr8_gene_51240_mRNA	Proximal
ZSDa015_Chr5_gene_111320_mRNA	Dispersed
ZSDa015_Chr17_gene_320930_mRNA	Proximal
ZSDa015_Chr4_gene_174140_mRNA	Tandem
ZSDa015_Chr13_gene_259860_mRNA	Proximal
ZSDa015_Chr14_gene_90150_mRNA	WGD/SD
ZSDa015_Chr3_gene_39370_mRNA	Dispersed
ZSDa015_Chr13_gene_252800_mRNA	Proximal
ZSDa015_Chr7_gene_298970_mRNA	WGD/SD
ZSDa015_Chr3_gene_37500_mRNA	Dispersed
ZSDa015_Chr17_gene_313820_mRNA	Dispersed
ZSDa015_Chr19_gene_153200_mRNA	Dispersed
ZSDa015_Chr16_gene_59480_mRNA	Tandem
ZSDa015_Chr18_gene_266660_mRNA	Dispersed
ZSDa015_Chr8_gene_49950_mRNA	WGD/SD
ZSDa015_Chr5_gene_121080_mRNA	WGD/SD
ZSDa015_Chr17_gene_318020_mRNA	Dispersed
ZSDa015_Chr4_gene_189730_mRNA	Dispersed
ZSDa015_Chr15_gene_163830_mRNA	WGD/SD
ZSDa015_Chr9_gene_336660_mRNA	WGD/SD
ZSDa015_Chr15_gene_163720_mRNA	Tandem
ZSDa015_Chr9_gene_337030_mRNA	Dispersed
ZSDa015_Chr2_gene_5400_mRNA	Proximal
ZSDa015_Chr17_gene_320170_mRNA	Tandem
ZSDa015_Chr15_gene_169820_mRNA	Dispersed
ZSDa015_Chr20_gene_209650_mRNA	Dispersed
ZSDa015_Chr8_gene_55290_mRNA	WGD/SD
ZSDa015_Chr2_gene_12840_mRNA	Tandem
ZSDa015_Chr4_gene_183120_mRNA	Tandem
ZSDa015_Chr8_gene_48510_mRNA	WGD/SD
ZSDa015_Chr7_gene_288680_mRNA	Dispersed
ZSDa015_Chr2_gene_5230_mRNA	Dispersed
ZSDa015_Chr20_gene_207390_mRNA	Dispersed
ZSDa015_Chr15_gene_160290_mRNA	Proximal
ZSDa015_Chr15_gene_162550_mRNA	Proximal
ZSDa015_Chr7_gene_280480_mRNA	Tandem
ZSDa015_Chr16_gene_71340_mRNA	Dispersed
ZSDa015_Chr1_gene_215120_mRNA	WGD/SD
ZSDa015_Chr8_gene_48520_mRNA	WGD/SD
ZSDa015_Chr15_gene_170330_mRNA	Dispersed
ZSDa015_Chr8_gene_58000_mRNA	WGD/SD
ZSDa015_Chr13_gene_260020_mRNA	Tandem
ZSDa015_Chr8_gene_30230_mRNA	Dispersed
ZSDa015_Chr5_gene_128340_mRNA	Dispersed
ZSDa015_Chr15_gene_170960_mRNA	Proximal
ZSDa015_Chr20_gene_211860_mRNA	WGD/SD
ZSDa015_Chr17_gene_320920_mRNA	Proximal
ZSDa015_Chr16_gene_59520_mRNA	Tandem
ZSDa015_Chr15_gene_168680_mRNA	Dispersed
ZSDa015_Chr3_gene_44340_mRNA	Dispersed
ZSDa015_Chr16_gene_58460_mRNA	Dispersed
ZSDa015_Chr8_gene_51210_mRNA	Proximal
ZSDa015_Chr17_gene_325940_mRNA	Dispersed
ZSDa015_Chr15_gene_170860_mRNA	Tandem
ZSDa015_Chr17_gene_314830_mRNA	WGD/SD
ZSDa015_Chr15_gene_163670_mRNA	WGD/SD
ZSDa015_Chr17_gene_323180_mRNA	WGD/SD
ZSDa015_Chr19_gene_147030_mRNA	Dispersed
ZSDa015_Chr12_gene_75480_mRNA	WGD/SD
ZSDa015_Chr5_gene_118010_mRNA	Proximal
ZSDa015_Chr2_gene_11790_mRNA	WGD/SD
ZSDa015_Chr2_gene_5370_mRNA	Proximal
ZSDa015_Chr10_gene_244020_mRNA	Dispersed
ZSDa015_Chr2_gene_13460_mRNA	Proximal
ZSDa015_Chr7_gene_280490_mRNA	Tandem
ZSDa015_Chr9_gene_338280_mRNA	Dispersed
ZSDa015_Chr7_gene_289680_mRNA	Tandem
ZSDa015_Chr7_gene_295830_mRNA	Dispersed
ZSDa015_Chr5_gene_110210_mRNA	WGD/SD
ZSDa015_Chr10_gene_245970_mRNA	WGD/SD
ZSDa015_Chr3_gene_39410_mRNA	Dispersed
ZSDa015_Chr15_gene_156140_mRNA	Proximal
ZSDa015_Chr13_gene_259930_mRNA	Proximal
ZSDa015_Chr14_gene_88270_mRNA	Dispersed
ZSDa015_Chr8_gene_48200_mRNA	Tandem
ZSDa015_Chr12_gene_81390_mRNA	WGD/SD
ZSDa015_Chr13_gene_260140_mRNA	WGD/SD
ZSDa015_Chr15_gene_161450_mRNA	WGD/SD
ZSDa015_Chr10_gene_238960_mRNA	Dispersed
ZSDa015_Chr13_gene_259900_mRNA	Proximal
ZSDa015_Chr15_gene_156190_mRNA	Tandem
ZSDa015_Chr4_gene_186660_mRNA	Tandem
ZSDa015_Chr17_gene_320960_mRNA	Tandem
ZSDa015_Chr17_gene_318830_mRNA	Proximal
ZSDa015_Chr2_gene_5410_mRNA	Proximal
ZSDa015_Chr20_gene_211110_mRNA	Tandem
ZSDa015_Chr15_gene_163820_mRNA	Tandem
ZSDa015_Chr13_gene_259950_mRNA	Proximal
ZSDa015_Chr17_gene_328340_mRNA	WGD/SD
ZSDa015_Chr5_gene_126710_mRNA	WGD/SD
ZSDa015_Chr12_gene_75490_mRNA	Tandem
ZSDa015_Chr15_gene_170950_mRNA	Tandem
ZSDa015_Chr5_gene_105240_mRNA	Tandem
ZSDa015_Chr5_gene_124480_mRNA	Proximal
ZSDa015_Chr4_gene_191870_mRNA	Dispersed
ZSDa015_Chr19_gene_135120_mRNA	WGD/SD
ZSDa015_Chr16_gene_59500_mRNA	Tandem
ZSDa015_Chr15_gene_155930_mRNA	Tandem
ZSDa015_Chr15_gene_170890_mRNA	Tandem
ZSDa015_Chr6_gene_227840_mRNA	WGD/SD
ZSDa015_Chr2_gene_5000_mRNA	Dispersed
ZSDa015_Chr14_gene_93230_mRNA	Proximal
ZSDa015_Chr17_gene_319210_mRNA	Tandem
ZSDa015_Chr5_gene_109160_mRNA	Dispersed
ZSDa015_Chr8_gene_51170_mRNA	Proximal
ZSDa015_Chr5_gene_112340_mRNA	WGD/SD
ZSDa015_Chr8_gene_25260_mRNA	WGD/SD
ZSDa015_Chr14_gene_93260_mRNA	Proximal
ZSDa015_Chr4_gene_186010_mRNA	WGD/SD
ZSDa015_Chr5_gene_124430_mRNA	Tandem
ZSDa015_Chr9_gene_337200_mRNA	Proximal
ZSDa015_Chr5_gene_114020_mRNA	Dispersed
ZSDa015_Chr18_gene_272850_mRNA	Dispersed
ZSDa015_Chr5_gene_110630_mRNA	Tandem
ZSDa015_Chr15_gene_165240_mRNA	Dispersed
ZSDa015_Chr4_gene_174120_mRNA	Tandem
ZSDa015_Chr13_gene_259980_mRNA	Proximal
ZSDa015_Chr20_gene_208070_mRNA	Dispersed
ZSDa015_Chr15_gene_163840_mRNA	Tandem
ZSDa015_Chr16_gene_63560_mRNA	Proximal
ZSDa015_Chr7_gene_297070_mRNA	Tandem
ZSDa015_Chr17_gene_326530_mRNA	Tandem
ZSDa015_Chr2_gene_4800_mRNA	Tandem
ZSDa015_Chr18_gene_279120_mRNA	Dispersed
ZSDa015_Chr11_gene_310140_mRNA	Dispersed
ZSDa015_Chr15_gene_156180_mRNA	Tandem
ZSDa015_Chr8_gene_22220_mRNA	WGD/SD
ZSDa015_Chr19_gene_134130_mRNA	Tandem
ZSDa015_Chr19_gene_134160_mRNA	Tandem
ZSDa015_Chr10_gene_240650_mRNA	Dispersed
ZSDa015_Chr5_gene_110610_mRNA	Tandem
ZSDa015_Chr13_gene_260050_mRNA	Tandem
ZSDa015_Chr10_gene_238130_mRNA	WGD/SD
ZSDa015_Chr17_gene_327380_mRNA	Proximal
ZSDa015_Chr16_gene_59470_mRNA	Tandem
ZSDa015_Chr18_gene_270730_mRNA	WGD/SD
ZSDa015_Chr13_gene_252570_mRNA	Dispersed
ZSDa015_Chr15_gene_162510_mRNA	Tandem
ZSDa015_Chr17_gene_326060_mRNA	Tandem
ZSDa015_Chr4_gene_183130_mRNA	Tandem
ZSDa015_Chr12_gene_80990_mRNA	Proximal
ZSDa015_Chr20_gene_205890_mRNA	Dispersed
ZSDa015_Chr3_gene_40840_mRNA	WGD/SD
ZSDa015_Chr4_gene_181750_mRNA	Tandem
ZSDa015_Chr15_gene_163770_mRNA	Tandem
ZSDa015_Chr15_gene_165150_mRNA	WGD/SD
ZSDa015_Chr17_gene_328190_mRNA	WGD/SD
ZSDa015_Chr8_gene_51290_mRNA	Tandem
ZSDa015_Chr8_gene_22230_mRNA	Tandem
ZSDa015_Chr15_gene_170970_mRNA	Tandem
ZSDa015_Chr11_gene_311290_mRNA	Dispersed
ZSDa015_Chr12_gene_75300_mRNA	Tandem
ZSDa015_Chr2_gene_13450_mRNA	Dispersed
ZSDa015_Chr19_gene_133220_mRNA	Dispersed
ZSDa015_Chr3_gene_44230_mRNA	Dispersed
ZSDa015_Chr4_gene_181290_mRNA	WGD/SD
ZSDa015_Chr1_gene_216480_mRNA	WGD/SD
ZSDa015_Chr7_gene_297060_mRNA	Tandem
ZSDa015_Chr19_gene_152000_mRNA	WGD/SD
ZSDa015_Chr17_gene_326090_mRNA	Tandem
ZSDa015_Chr12_gene_75290_mRNA	Tandem
ZSDa015_Chr19_gene_140730_mRNA	WGD/SD
ZSDa015_Chr15_gene_162450_mRNA	Proximal
ZSDa015_Chr17_gene_327440_mRNA	Dispersed
ZSDa015_Chr17_gene_327320_mRNA	Tandem
ZSDa015_Chr4_gene_187030_mRNA	WGD/SD
ZSDa015_Chr18_gene_268650_mRNA	Dispersed
ZSDa015_Chr13_gene_260080_mRNA	Proximal
ZSDa015_Chr15_gene_163680_mRNA	Tandem
ZSDa015_Chr2_gene_4970_mRNA	Tandem
ZSDa015_Chr15_gene_170910_mRNA	Proximal
ZSDa015_Chr13_gene_252550_mRNA	Tandem
ZSDa015_Chr19_gene_145030_mRNA	Tandem
ZSDa015_Chr19_gene_139610_mRNA	Dispersed
ZSDa015_Chr13_gene_260030_mRNA	Tandem
ZSDa015_Chr5_gene_127720_mRNA	Dispersed
ZSDa015_Chr17_gene_320970_mRNA	Tandem
ZSDa015_Chr18_gene_273840_mRNA	WGD/SD
ZSDa015_Chr13_gene_252560_mRNA	Tandem
ZSDa015_Chr17_gene_325960_mRNA	Dispersed
ZSDa015_Chr15_gene_155940_mRNA	Tandem
ZSDa015_Chr8_gene_49580_mRNA	Dispersed
ZSDa015_Chr19_gene_134180_mRNA	Tandem
ZSDa015_Chr15_gene_162480_mRNA	Proximal
ZSDa015_Chr8_gene_22280_mRNA	WGD/SD
ZSDa015_Chr4_gene_177980_mRNA	Dispersed
ZSDa015_Chr12_gene_79680_mRNA	Dispersed
ZSDa015_Chr8_gene_57210_mRNA	Tandem
ZSDa015_Chr8_gene_31650_mRNA	Dispersed
ZSDa015_Chr11_gene_306130_mRNA	Dispersed
ZSDa015_Chr15_gene_163070_mRNA	WGD/SD
ZSDa015_Chr8_gene_26840_mRNA	Proximal
ZSDa015_Chr15_gene_162490_mRNA	Proximal
ZSDa015_Chr15_gene_165870_mRNA	Dispersed
ZSDa015_Chr19_gene_140990_mRNA	Proximal
ZSDa015_Chr8_gene_48470_mRNA	WGD/SD
ZSDa015_Chr17_gene_326070_mRNA	Tandem
ZSDa015_Chr16_gene_63550_mRNA	Proximal
ZSDa015_Chr5_gene_107570_mRNA	WGD/SD
ZSDa015_Chr15_gene_166880_mRNA	Dispersed
ZSDa015_Chr13_gene_260390_mRNA	Dispersed
ZSDa015_Chr4_gene_192860_mRNA	WGD/SD
ZSDa015_Chr5_gene_128090_mRNA	Dispersed
ZSDa015_Chr17_gene_321440_mRNA	Dispersed
ZSDa015_Chr7_gene_291350_mRNA	WGD/SD
ZSDa015_Chr8_gene_27240_mRNA	Dispersed
ZSDa015_Chr11_gene_311300_mRNA	Dispersed
ZSDa015_Chr5_gene_126860_mRNA	WGD/SD
ZSDa015_Chr7_gene_295820_mRNA	Dispersed
ZSDa015_Chr9_gene_341680_mRNA	Dispersed
ZSDa015_Chr15_gene_169670_mRNA	Dispersed
ZSDa015_Chr5_gene_122720_mRNA	Dispersed
ZSDa015_Chr13_gene_260850_mRNA	Dispersed
ZSDa015_Chr15_gene_164090_mRNA	Tandem
ZSDa015_Chr19_gene_153370_mRNA	WGD/SD
ZSDa015_Chr15_gene_160310_mRNA	Proximal
ZSDa015_Chr16_gene_59460_mRNA	Tandem
ZSDa015_Chr17_gene_320760_mRNA	Proximal
ZSDa015_Chr3_gene_34090_mRNA	WGD/SD
ZSDa015_Chr15_gene_160270_mRNA	Proximal
ZSDa015_Chr15_gene_155970_mRNA	Proximal
ZSDa015_Chr17_gene_319200_mRNA	Tandem
ZSDa015_Chr4_gene_181340_mRNA	Dispersed
ZSDa015_Chr15_gene_158440_mRNA	WGD/SD
ZSDa015_Chr14_gene_98530_mRNA	Dispersed
ZSDa015_Chr2_gene_13440_mRNA	Tandem
ZSDa015_Chr5_gene_117660_mRNA	Tandem
ZSDa015_Chr8_gene_57170_mRNA	Tandem
ZSDa015_Chr20_gene_206050_mRNA	WGD/SD
ZSDa015_Chr14_gene_100000_mRNA	Dispersed
ZSDa015_Chr2_gene_12290_mRNA	Dispersed
ZSDa015_Chr15_gene_163870_mRNA	Tandem
ZSDa015_Chr3_gene_43100_mRNA	Dispersed
ZSDa015_Chr2_gene_5040_mRNA	Proximal
ZSDa015_Chr4_gene_181760_mRNA	Tandem
ZSDa015_Chr20_gene_211230_mRNA	Tandem
ZSDa015_Chr18_gene_264680_mRNA	WGD/SD
ZSDa015_Chr15_gene_157340_mRNA	Dispersed
ZSDa015_Chr17_gene_326540_mRNA	Tandem
ZSDa015_Chr2_gene_13420_mRNA	Proximal
ZSDa015_Chr8_gene_51220_mRNA	Proximal
ZSDa015_Chr9_gene_337300_mRNA	WGD/SD
ZSDa015_Chr2_gene_5160_mRNA	Proximal
ZSDa015_Chr17_gene_326490_mRNA	WGD/SD
ZSDa015_Chr12_gene_75310_mRNA	Tandem
ZSDa015_Chr13_gene_252540_mRNA	Tandem
ZSDa015_Chr10_gene_247970_mRNA	Dispersed
ZSDa015_Chr2_gene_9060_mRNA	WGD/SD
ZSDa015_Chr4_gene_188820_mRNA	Tandem
ZSDa015_Chr4_gene_188100_mRNA	WGD/SD
ZSDa015_Chr5_gene_126360_mRNA	Dispersed
ZSDa015_Chr10_gene_247080_mRNA	Dispersed
ZSDa015_Chr5_gene_110230_mRNA	Tandem
ZSDa015_Chr11_gene_306800_mRNA	WGD/SD
ZSDa015_Chr15_gene_165180_mRNA	Dispersed
ZSDa015_Chr15_gene_163850_mRNA	Tandem
ZSDa015_Chr1_gene_220790_mRNA	Dispersed
ZSDa015_Chr1_gene_225430_mRNA	Dispersed
ZSDa015_Chr16_gene_64820_mRNA	Dispersed
ZSDa015_Chr12_gene_75500_mRNA	Tandem
ZSDa015_Chr5_gene_118470_mRNA	Dispersed
ZSDa015_Chr2_gene_15120_mRNA	Dispersed
ZSDa015_Chr1_gene_215810_mRNA	Dispersed
ZSDa015_Chr5_gene_118020_mRNA	Proximal
ZSDa015_Chr14_gene_96200_mRNA	Dispersed
ZSDa015_Chr4_gene_178580_mRNA	WGD/SD
ZSDa015_Chr8_gene_26790_mRNA	Dispersed
ZSDa015_Chr8_gene_26990_mRNA	Proximal
ZSDa015_Chr4_gene_174130_mRNA	Tandem
ZSDa015_Chr15_gene_163410_mRNA	Dispersed
ZSDa015_Chr18_gene_273250_mRNA	Dispersed
ZSDa015_Chr14_gene_98450_mRNA	Dispersed
ZSDa015_Chr14_gene_96040_mRNA	WGD/SD
ZSDa015_Chr4_gene_182410_mRNA	WGD/SD
ZSDa015_Chr18_gene_271710_mRNA	Tandem
ZSDa015_Chr5_gene_110220_mRNA	Tandem
ZSDa015_Chr15_gene_165160_mRNA	Tandem
ZSDa015_Chr15_gene_170870_mRNA	Proximal
ZSDa015_Chr4_gene_174150_mRNA	Tandem
ZSDa015_Chr13_gene_252580_mRNA	Proximal
ZSDa015_Chr18_gene_272200_mRNA	Dispersed
ZSDa015_Chr9_gene_335890_mRNA	Dispersed
ZSDa015_Chr13_gene_259970_mRNA	Proximal
ZSDa015_Chr2_gene_5360_mRNA	Proximal
ZSDa015_Chr7_gene_280190_mRNA	WGD/SD
ZSDa015_Chr17_gene_315660_mRNA	Dispersed
ZSDa015_Chr19_gene_144790_mRNA	Dispersed
ZSDa015_Chr5_gene_123090_mRNA	Dispersed
ZSDa015_Chr15_gene_157060_mRNA	Dispersed
ZSDa015_Chr5_gene_124520_mRNA	Tandem
ZSDa015_Chr17_gene_320200_mRNA	Proximal
ZSDa015_Chr8_gene_23270_mRNA	WGD/SD
ZSDa015_Chr15_gene_162580_mRNA	Proximal
ZSDa015_Chr2_gene_13430_mRNA	Tandem
ZSDa015_Chr7_gene_281430_mRNA	Dispersed
ZSDa015_Chr5_gene_108190_mRNA	WGD/SD
ZSDa015_Chr13_gene_260010_mRNA	Tandem
ZSDa015_Chr15_gene_170920_mRNA	Proximal
ZSDa015_Chr11_gene_311050_mRNA	Dispersed
ZSDa015_Chr5_gene_120180_mRNA	Dispersed
ZSDa015_Chr2_gene_13410_mRNA	Proximal
ZSDa015_Chr20_gene_208800_mRNA	WGD/SD
ZSDa015_Chr19_gene_134120_mRNA	Tandem
ZSDa015_Chr4_gene_175110_mRNA	Dispersed
ZSDa015_Chr17_gene_328200_mRNA	Tandem
ZSDa015_Chr20_gene_211220_mRNA	Tandem
ZSDa015_Chr2_gene_5010_mRNA	Proximal
ZSDa015_Chr13_gene_259920_mRNA	Proximal
ZSDa015_Chr5_gene_124020_mRNA	WGD/SD
ZSDa015_Chr10_gene_238950_mRNA	Dispersed
ZSDa015_Chr5_gene_110550_mRNA	WGD/SD
ZSDa015_Chr11_gene_306550_mRNA	Dispersed
ZSDa015_Chr5_gene_114360_mRNA	Dispersed
ZSDa015_Chr15_gene_170880_mRNA	Proximal
ZSDa015_Chr20_gene_211240_mRNA	Tandem
ZSDa015_Chr15_gene_163810_mRNA	Tandem
ZSDa015_Chr13_gene_253000_mRNA	Tandem
ZSDa015_Chr20_gene_211140_mRNA	Tandem
ZSDa015_Chr16_gene_59440_mRNA	Tandem
ZSDa015_Chr15_gene_163860_mRNA	Tandem
ZSDa015_Chr8_gene_51260_mRNA	Tandem
ZSDa015_Chr7_gene_280460_mRNA	Tandem
ZSDa015_Chr9_gene_329510_mRNA	WGD/SD
ZSDa015_Chr19_gene_133290_mRNA	Dispersed
ZSDa015_Chr13_gene_259880_mRNA	Proximal
ZSDa015_Chr5_gene_126010_mRNA	Dispersed
ZSDa015_Chr19_gene_134140_mRNA	Tandem
ZSDa015_Chr9_gene_339190_mRNA	WGD/SD
ZSDa015_Chr14_gene_95510_mRNA	Dispersed
ZSDa015_Chr20_gene_204870_mRNA	WGD/SD
ZSDa015_Chr15_gene_164080_mRNA	Tandem
ZSDa015_Chr13_gene_259910_mRNA	Proximal
ZSDa015_Chr18_gene_271700_mRNA	Tandem
ZSDa015_Chr19_gene_141020_mRNA	Proximal
ZSDa015_Chr8_gene_51180_mRNA	Proximal
ZSDa015_Chr14_gene_96400_mRNA	Dispersed
ZSDa015_Chr12_gene_80200_mRNA	WGD/SD
ZSDa015_Chr3_gene_34180_mRNA	Dispersed
ZSDa015_Chr15_gene_166900_mRNA	Dispersed
ZSDa015_Chr7_gene_291010_mRNA	Dispersed
ZSDa015_Chr11_gene_305620_mRNA	WGD/SD
ZSDa015_Chr12_gene_73960_mRNA	WGD/SD
ZSDa015_Chr15_gene_156150_mRNA	WGD/SD
ZSDa015_Chr8_gene_57110_mRNA	WGD/SD
ZSDa015_Chr7_gene_290950_mRNA	WGD/SD
ZSDa015_Chr7_gene_291600_mRNA	WGD/SD
ZSDa015_Chr2_gene_5330_mRNA	Tandem
ZSDa015_Chr19_gene_153380_mRNA	WGD/SD
ZSDa015_Chr9_gene_341630_mRNA	WGD/SD
ZSDa015_Chr2_gene_5170_mRNA	Proximal
ZSDa015_Chr8_gene_25840_mRNA	WGD/SD
ZSDa015_Chr5_gene_117370_mRNA	Tandem
ZSDa015_Chr4_gene_189470_mRNA	Dispersed
ZSDa015_Chr15_gene_155950_mRNA	Tandem
ZSDa015_Chr8_gene_51190_mRNA	Proximal
ZSDa015_Chr3_gene_46190_mRNA	Dispersed
ZSDa015_Chr15_gene_156170_mRNA	WGD/SD
ZSDa015_Chr15_gene_170850_mRNA	Proximal
ZSDa015_Chr5_gene_128080_mRNA	Dispersed
ZSDa015_Chr14_gene_96950_mRNA	Dispersed
ZSDa015_Chr4_gene_187200_mRNA	Dispersed
ZSDa015_Chr15_gene_161570_mRNA	WGD/SD
ZSDa015_Chr17_gene_314790_mRNA	Proximal
ZSDa015_Chr17_gene_318860_mRNA	Proximal
ZSDa015_Chr5_gene_120530_mRNA	WGD/SD
ZSDa015_Chr7_gene_280450_mRNA	Tandem
ZSDa015_Chr18_gene_263620_mRNA	Dispersed
ZSDa015_Chr13_gene_260060_mRNA	Tandem
ZSDa015_Chr7_gene_298520_mRNA	Dispersed
ZSDa015_Chr9_gene_337140_mRNA	WGD/SD
ZSDa015_Chr2_gene_19180_mRNA	Dispersed
ZSDa015_Chr8_gene_56710_mRNA	Dispersed
ZSDa015_Chr13_gene_259990_mRNA	Tandem
ZSDa015_Chr4_gene_188840_mRNA	Tandem
ZSDa015_Chr19_gene_137860_mRNA	Dispersed
ZSDa015_Chr4_gene_188580_mRNA	Dispersed
ZSDa015_Chr16_gene_59490_mRNA	Tandem
ZSDa015_Chr5_gene_115830_mRNA	Dispersed
ZSDa015_Chr16_gene_70640_mRNA	Dispersed
ZSDa015_Chr4_gene_188390_mRNA	Dispersed
ZSDa015_Chr2_gene_5020_mRNA	Dispersed
ZSDa015_Chr19_gene_138600_mRNA	Dispersed
ZSDa015_Chr3_gene_47120_mRNA	WGD/SD
ZSDa015_Chr19_gene_137980_mRNA	Proximal
ZSDa015_Chr15_gene_156130_mRNA	Proximal
ZSDa015_Chr4_gene_175870_mRNA	Tandem
ZSDa015_Chr20_gene_211130_mRNA	Tandem
ZSDa015_Chr15_gene_156160_mRNA	Proximal
ZSDa015_Chr12_gene_75280_mRNA	Tandem
ZSDa015_Chr8_gene_48230_mRNA	Tandem
ZSDa015_Chr20_gene_213700_mRNA	WGD/SD
ZSDa015_Chr8_gene_48540_mRNA	Proximal
ZSDa015_Chr5_gene_118700_mRNA	Proximal
ZSDa015_Chr15_gene_163740_mRNA	Proximal
ZSDa015_Chr13_gene_259890_mRNA	Proximal
ZSDa015_Chr2_gene_5120_mRNA	Proximal
ZSDa015_Chr2_gene_11660_mRNA	Dispersed
ZSDa015_Chr5_gene_119670_mRNA	WGD/SD
ZSDa015_Chr13_gene_259670_mRNA	Tandem
ZSDa015_Chr8_gene_57200_mRNA	Tandem
ZSDa015_Chr8_gene_31620_mRNA	WGD/SD
ZSDa015_Chr14_gene_95000_mRNA	Dispersed
ZSDa015_Chr15_gene_170840_mRNA	Proximal
ZSDa015_Chr7_gene_280900_mRNA	WGD/SD
ZSDa015_Chr11_gene_312380_mRNA	Dispersed
ZSDa015_Chr2_gene_5320_mRNA	Tandem
ZSDa015_Chr8_gene_51300_mRNA	Tandem
ZSDa015_Chr3_gene_33810_mRNA	Dispersed
ZSDa015_Chr19_gene_138010_mRNA	Proximal
ZSDa015_Chr2_gene_14720_mRNA	Dispersed
ZSDa015_Chr8_gene_50870_mRNA	Dispersed
ZSDa015_Chr8_gene_31640_mRNA	Dispersed
ZSDa015_Chr17_gene_324600_mRNA	Dispersed
ZSDa015_Chr20_gene_208320_mRNA	Dispersed
ZSDa015_Chr15_gene_170980_mRNA	Proximal
ZSDa015_Chr4_gene_191550_mRNA	Dispersed
ZSDa015_Chr4_gene_192790_mRNA	Dispersed
ZSDa015_Chr18_gene_270510_mRNA	Dispersed
ZSDa015_Chr12_gene_75720_mRNA	WGD/SD
ZSDa015_Chr2_gene_12220_mRNA	Dispersed
ZSDa015_Chr13_gene_258680_mRNA	Dispersed
ZSDa015_Chr14_gene_104020_mRNA	Dispersed
ZSDa015_Chr3_gene_43830_mRNA	WGD/SD
ZSDa015_Chr16_gene_66880_mRNA	Dispersed
ZSDa015_Chr2_gene_16500_mRNA	Dispersed
ZSDa015_Chr5_gene_130320_mRNA	WGD/SD
ZSDa015_Chr5_gene_105840_mRNA	Dispersed
ZSDa015_Chr2_gene_12850_mRNA	Tandem
ZSDa015_Chr5_gene_117380_mRNA	Tandem
ZSDa015_Chr17_gene_315340_mRNA	WGD/SD
ZSDa015_Chr8_gene_55380_mRNA	Dispersed
ZSDa015_Chr2_gene_5210_mRNA	Dispersed
ZSDa015_Chr7_gene_296750_mRNA	Proximal
ZSDa015_Chr9_gene_329910_mRNA	WGD/SD
ZSDa015_Chr7_gene_286960_mRNA	Tandem
ZSDa015_Chr19_gene_138510_mRNA	Dispersed
ZSDa015_Chr5_gene_123350_mRNA	Dispersed
ZSDa015_Chr8_gene_51280_mRNA	Tandem
ZSDa015_Chr15_gene_165000_mRNA	Tandem
ZSDa015_Chr15_gene_170810_mRNA	Proximal
ZSDa015_Chr4_gene_188550_mRNA	WGD/SD
ZSDa015_Chr5_gene_117360_mRNA	Tandem
ZSDa015_Chr8_gene_48480_mRNA	Tandem
ZSDa015_Chr13_gene_259850_mRNA	Proximal
ZSDa015_Chr8_gene_48490_mRNA	Tandem
ZSDa015_Chr17_gene_320060_mRNA	Dispersed
ZSDa015_Chr15_gene_163710_mRNA	Tandem
ZSDa015_Chr18_gene_274260_mRNA	WGD/SD
ZSDa015_Chr8_gene_26180_mRNA	WGD/SD
ZSDa015_Chr9_gene_335840_mRNA	WGD/SD
ZSDa015_Chr5_gene_108050_mRNA	Dispersed
ZSDa015_Chr19_gene_155100_mRNA	Dispersed
ZSDa015_Chr16_gene_62510_mRNA	Dispersed
ZSDa015_Chr13_gene_259940_mRNA	Proximal
ZSDa015_Chr20_gene_205840_mRNA	Dispersed
ZSDa015_Chr15_gene_170730_mRNA	Dispersed
ZSDa015_Chr5_gene_105290_mRNA	Dispersed
ZSDa015_Chr9_gene_338570_mRNA	Dispersed
ZSDa015_Chr5_gene_111930_mRNA	Dispersed
ZSDa015_Chr8_gene_48500_mRNA	Tandem
ZSDa015_Chr2_gene_5340_mRNA	Proximal
ZSDa015_Chr8_gene_26960_mRNA	Proximal
ZSDa015_Chr2_gene_5030_mRNA	Dispersed
ZSDa015_Chr17_gene_320770_mRNA	Proximal
ZSDa015_Chr16_gene_72260_mRNA	Dispersed
ZSDa015_Chr8_gene_26930_mRNA	Proximal
ZSDa015_Chr5_gene_105480_mRNA	WGD/SD
ZSDa015_Chr12_gene_75020_mRNA	WGD/SD
ZSDa015_Chr8_gene_48530_mRNA	Tandem
ZSDa015_Chr14_gene_87310_mRNA	Dispersed
ZSDa015_Chr2_gene_19660_mRNA	Dispersed
ZSDa015_Chr19_gene_136720_mRNA	WGD/SD
ZSDa015_Chr15_gene_162530_mRNA	Proximal
ZSDa015_Chr2_gene_4980_mRNA	Proximal
ZSDa015_Chr12_gene_85890_mRNA	WGD/SD
ZSDa015_Chr17_gene_326080_mRNA	Tandem
ZSDa015_Chr15_gene_170940_mRNA	Tandem
ZSDa015_Chr5_gene_105270_mRNA	Tandem
ZSDa015_Chr14_gene_97090_mRNA	Dispersed
ZSDa015_Chr15_gene_162500_mRNA	Tandem
ZSDa015_Chr5_gene_110670_mRNA	WGD/SD
ZSDa015_Chr5_gene_118570_mRNA	WGD/SD
ZSDa015_Chr17_gene_327260_mRNA	Dispersed
ZSDa015_Chr15_gene_170740_mRNA	Proximal
ZSDa015_Chr19_gene_137930_mRNA	WGD/SD
ZSDa015_Chr19_gene_149830_mRNA	Tandem
ZSDa015_Chr19_gene_146530_mRNA	Tandem
ZSDa015_Chr17_gene_314820_mRNA	Proximal
ZSDa015_Chr3_gene_34100_mRNA	Tandem
ZSDa015_Chr15_gene_170720_mRNA	Proximal
ZSDa015_Chr8_gene_57190_mRNA	Tandem
ZSDa015_Chr5_gene_128910_mRNA	Dispersed
ZSDa015_Chr4_gene_186970_mRNA	WGD/SD
ZSDa015_Chr15_gene_160890_mRNA	Dispersed
ZSDa015_Chr14_gene_88320_mRNA	Dispersed
ZSDa015_Chr5_gene_117390_mRNA	Tandem
ZSDa015_Chr15_gene_163780_mRNA	WGD/SD
ZSDa015_Chr7_gene_296740_mRNA	Tandem
ZSDa015_Chr15_gene_157890_mRNA	Dispersed
ZSDa015_Chr17_gene_323250_mRNA	WGD/SD
ZSDa015_Chr9_gene_336250_mRNA	Dispersed
ZSDa015_Chr16_gene_65410_mRNA	WGD/SD
ZSDa015_Chr8_gene_48190_mRNA	Tandem
ZSDa015_Chr2_gene_5420_mRNA	Proximal
ZSDa015_Chr9_gene_332210_mRNA	Dispersed
ZSDa015_Chr8_gene_47930_mRNA	Dispersed
ZSDa015_Chr9_gene_330250_mRNA	WGD/SD
ZSDa015_Chr2_gene_5220_mRNA	Proximal
ZSDa015_Chr18_gene_278030_mRNA	Dispersed
ZSDa015_Chr20_gene_210660_mRNA	Dispersed
ZSDa015_Chr20_gene_211150_mRNA	Tandem
ZSDa015_Chr5_gene_117040_mRNA	Dispersed
ZSDa015_Chr10_gene_239460_mRNA	Tandem
ZSDa015_Chr8_gene_48160_mRNA	WGD/SD
ZSDa015_Chr15_gene_163730_mRNA	Tandem
ZSDa015_Chr17_gene_320780_mRNA	Proximal
ZSDa015_Chr2_gene_8960_mRNA	Dispersed
ZSDa015_Chr20_gene_203860_mRNA	Dispersed
ZSDa015_Chr18_gene_266880_mRNA	Dispersed
ZSDa015_Chr19_gene_135360_mRNA	WGD/SD
ZSDa015_Chr16_gene_63740_mRNA	WGD/SD
ZSDa015_Chr13_gene_259870_mRNA	Proximal
ZSDa015_Chr5_gene_110600_mRNA	Proximal
ZSDa015_Chr7_gene_280210_mRNA	Dispersed
ZSDa015_Chr8_gene_48220_mRNA	WGD/SD
ZSDa015_Chr5_gene_105970_mRNA	Dispersed
ZSDa015_Chr10_gene_245480_mRNA	Dispersed
ZSDa015_Chr7_gene_289670_mRNA	WGD/SD
ZSDa015_Chr8_gene_48170_mRNA	Proximal
ZSDa015_Chr8_gene_57180_mRNA	Tandem
ZSDa015_Chr14_gene_99000_mRNA	WGD/SD
ZSDa015_Chr7_gene_282130_mRNA	WGD/SD
ZSDa015_Chr13_gene_260000_mRNA	Tandem
ZSDa015_Chr19_gene_146520_mRNA	Tandem
ZSDa015_Chr12_gene_75440_mRNA	WGD/SD
ZSDa015_Chr19_gene_131890_mRNA	WGD/SD
ZSDa015_Chr6_gene_202260_mRNA	WGD/SD
ZSDa015_Chr12_gene_81870_mRNA	WGD/SD
ZSDa015_Chr15_gene_164100_mRNA	Tandem
ZSDa015_Chr17_gene_320190_mRNA	Proximal
ZSDa015_Chr15_gene_155580_mRNA	Dispersed
ZSDa015_Chr17_gene_322020_mRNA	WGD/SD
ZSDa015_Chr1_gene_215800_mRNA	Dispersed
ZSDa015_Chr13_gene_259960_mRNA	Proximal
ZSDa015_Chr2_gene_5240_mRNA	Dispersed
ZSDa015_Chr14_gene_93240_mRNA	Proximal
ZSDa015_Chr5_gene_107580_mRNA	WGD/SD
ZSDa015_Chr2_gene_5430_mRNA	Proximal
ZSDa015_Chr20_gene_211120_mRNA	Tandem
ZSDa015_Chr15_gene_162780_mRNA	Dispersed
ZSDa015_Chr16_gene_59530_mRNA	Tandem
ZSDa015_Chr15_gene_155920_mRNA	WGD/SD
ZSDa015_Chr15_gene_163790_mRNA	Tandem
ZSDa015_Chr15_gene_171000_mRNA	Tandem
ZSDa015_Chr15_gene_164110_mRNA	Tandem
ZSDa015_Chr16_gene_60890_mRNA	WGD/SD
ZSDa015_Chr15_gene_157080_mRNA	Tandem
ZSDa015_Chr16_gene_59450_mRNA	Tandem
ZSDa015_Chr17_gene_320790_mRNA	Proximal
ZSDa015_Chr12_gene_75590_mRNA	Dispersed
ZSDa015_Chr8_gene_30150_mRNA	Dispersed
ZSDa015_Chr18_gene_271690_mRNA	WGD/SD
ZSDa015_Chr19_gene_145040_mRNA	Tandem
ZSDa018_Chr18_gene_280780_mRNA	Dispersed
ZSDa018_Chr20_gene_291210_mRNA	Tandem
ZSDa018_Chr9_gene_210360_mRNA	WGD/SD
ZSDa018_Chr11_gene_168250_mRNA	WGD/SD
ZSDa018_Chr16_gene_148620_mRNA	Proximal
ZSDa018_Chr18_gene_299370_mRNA	Dispersed
ZSDa018_Chr8_gene_154300_mRNA	Proximal
ZSDa018_Chr5_gene_272090_mRNA	Dispersed
ZSDa018_Chr13_gene_234400_mRNA	Tandem
ZSDa018_Chr8_gene_157510_mRNA	Dispersed
ZSDa018_Chr15_gene_175380_mRNA	WGD/SD
ZSDa018_Chr1_gene_56920_mRNA	Dispersed
ZSDa018_Chr5_gene_260280_mRNA	Proximal
ZSDa018_Chr2_gene_80830_mRNA	Dispersed
ZSDa018_Chr17_gene_7040_mRNA	Dispersed
ZSDa018_Chr2_gene_72990_mRNA	Proximal
ZSDa018_Chr17_gene_9110_mRNA	Dispersed
ZSDa018_Chr7_gene_311810_mRNA	WGD/SD
ZSDa018_Chr5_gene_255770_mRNA	Dispersed
ZSDa018_Chr5_gene_250290_mRNA	Dispersed
ZSDa018_Chr5_gene_272810_mRNA	Dispersed
ZSDa018_Chr8_gene_88070_mRNA	Tandem
ZSDa018_Chr13_gene_234520_mRNA	Proximal
ZSDa018_Chr17_gene_5650_mRNA	Dispersed
ZSDa018_Chr2_gene_79680_mRNA	Dispersed
ZSDa018_Chr4_gene_35220_mRNA	Dispersed
ZSDa018_Chr12_gene_199590_mRNA	Tandem
ZSDa018_Chr14_gene_340300_mRNA	Dispersed
ZSDa018_Chr11_gene_161390_mRNA	Dispersed
ZSDa018_Chr17_gene_13550_mRNA	Dispersed
ZSDa018_Chr5_gene_250020_mRNA	Dispersed
ZSDa018_Chr16_gene_145040_mRNA	Dispersed
ZSDa018_Chr5_gene_259620_mRNA	Proximal
ZSDa018_Chr16_gene_141660_mRNA	Dispersed
ZSDa018_Chr17_gene_320_mRNA	Proximal
ZSDa018_Chr9_gene_214290_mRNA	Dispersed
ZSDa018_Chr14_gene_323500_mRNA	Dispersed
ZSDa018_Chr13_gene_242340_mRNA	Proximal
ZSDa018_Chr15_gene_175000_mRNA	Proximal
ZSDa018_Chr4_gene_41810_mRNA	Tandem
ZSDa018_Chr8_gene_92850_mRNA	Dispersed
ZSDa018_Chr15_gene_181730_mRNA	Tandem
ZSDa018_Chr8_gene_151470_mRNA	Tandem
ZSDa018_Chr20_gene_290640_mRNA	Dispersed
ZSDa018_Chr15_gene_176280_mRNA	Tandem
ZSDa018_Chr14_gene_332040_mRNA	Dispersed
ZSDa018_Chr4_gene_47220_mRNA	Dispersed
ZSDa018_Chr15_gene_183930_mRNA	Proximal
ZSDa018_Chr9_gene_208170_mRNA	Dispersed
ZSDa018_Chr5_gene_260930_mRNA	Tandem
ZSDa018_Chr2_gene_80820_mRNA	Proximal
ZSDa018_Chr5_gene_265790_mRNA	WGD/SD
ZSDa018_Chr5_gene_269850_mRNA	WGD/SD
ZSDa018_Chr16_gene_141210_mRNA	WGD/SD
ZSDa018_Chr19_gene_118360_mRNA	Tandem
ZSDa018_Chr15_gene_180720_mRNA	Dispersed
ZSDa018_Chr8_gene_88060_mRNA	WGD/SD
ZSDa018_Chr8_gene_154410_mRNA	Tandem
ZSDa018_Chr20_gene_291890_mRNA	WGD/SD
ZSDa018_Chr7_gene_303240_mRNA	Tandem
ZSDa018_Chr17_gene_10320_mRNA	Tandem
ZSDa018_Chr13_gene_242360_mRNA	Tandem
ZSDa018_Chr2_gene_80870_mRNA	Proximal
ZSDa018_Chr8_gene_150850_mRNA	Dispersed
ZSDa018_Chr2_gene_73390_mRNA	Tandem
ZSDa018_Chr18_gene_281250_mRNA	WGD/SD
ZSDa018_Chr9_gene_213230_mRNA	Proximal
ZSDa018_Chr5_gene_264120_mRNA	Proximal
ZSDa018_Chr10_gene_26890_mRNA	Dispersed
ZSDa018_Chr5_gene_253840_mRNA	Proximal
ZSDa018_Chr8_gene_154400_mRNA	Tandem
ZSDa018_Chr2_gene_73160_mRNA	Tandem
ZSDa018_Chr17_gene_1220_mRNA	Dispersed
ZSDa018_Chr5_gene_263840_mRNA	Dispersed
ZSDa018_Chr15_gene_175060_mRNA	Tandem
ZSDa018_Chr17_gene_1120_mRNA	Tandem
ZSDa018_Chr3_gene_104030_mRNA	Dispersed
ZSDa018_Chr17_gene_9860_mRNA	Tandem
ZSDa018_Chr8_gene_151400_mRNA	WGD/SD
ZSDa018_Chr16_gene_141290_mRNA	WGD/SD
ZSDa018_Chr14_gene_331530_mRNA	Dispersed
ZSDa018_Chr8_gene_154340_mRNA	Proximal
ZSDa018_Chr16_gene_141750_mRNA	Proximal
ZSDa018_Chr14_gene_332740_mRNA	Dispersed
ZSDa018_Chr17_gene_13440_mRNA	WGD/SD
ZSDa018_Chr19_gene_129960_mRNA	WGD/SD
ZSDa018_Chr9_gene_213070_mRNA	Dispersed
ZSDa018_Chr15_gene_183760_mRNA	Tandem
ZSDa018_Chr13_gene_242070_mRNA	WGD/SD
ZSDa018_Chr8_gene_151460_mRNA	WGD/SD
ZSDa018_Chr2_gene_73000_mRNA	Proximal
ZSDa018_Chr13_gene_234470_mRNA	Proximal
ZSDa018_Chr13_gene_242320_mRNA	Proximal
ZSDa018_Chr7_gene_303000_mRNA	Dispersed
ZSDa018_Chr3_gene_98810_mRNA	Dispersed
ZSDa018_Chr15_gene_184870_mRNA	Tandem
ZSDa018_Chr16_gene_141740_mRNA	WGD/SD
ZSDa018_Chr8_gene_96560_mRNA	Tandem
ZSDa018_Chr17_gene_1090_mRNA	Tandem
ZSDa018_Chr5_gene_272610_mRNA	WGD/SD
ZSDa018_Chr8_gene_159150_mRNA	Tandem
ZSDa018_Chr15_gene_183750_mRNA	Tandem
ZSDa018_Chr15_gene_174930_mRNA	WGD/SD
ZSDa018_Chr13_gene_234050_mRNA	Dispersed
ZSDa018_Chr5_gene_255270_mRNA	Dispersed
ZSDa018_Chr15_gene_175130_mRNA	Tandem
ZSDa018_Chr8_gene_91100_mRNA	WGD/SD
ZSDa018_Chr13_gene_242310_mRNA	Dispersed
ZSDa018_Chr19_gene_126300_mRNA	Tandem
ZSDa018_Chr15_gene_174970_mRNA	Tandem
ZSDa018_Chr16_gene_138460_mRNA	Dispersed
ZSDa018_Chr15_gene_179820_mRNA	Dispersed
ZSDa018_Chr15_gene_175070_mRNA	Tandem
ZSDa018_Chr4_gene_46510_mRNA	WGD/SD
ZSDa018_Chr8_gene_96540_mRNA	WGD/SD
ZSDa018_Chr15_gene_176420_mRNA	WGD/SD
ZSDa018_Chr4_gene_43670_mRNA	WGD/SD
ZSDa018_Chr7_gene_311820_mRNA	Tandem
ZSDa018_Chr2_gene_80860_mRNA	Proximal
ZSDa018_Chr12_gene_199730_mRNA	WGD/SD
ZSDa018_Chr9_gene_217620_mRNA	WGD/SD
ZSDa018_Chr2_gene_73060_mRNA	Proximal
ZSDa018_Chr16_gene_141780_mRNA	Proximal
ZSDa018_Chr20_gene_283560_mRNA	WGD/SD
ZSDa018_Chr14_gene_322490_mRNA	Dispersed
ZSDa018_Chr20_gene_283600_mRNA	Dispersed
ZSDa018_Chr2_gene_81350_mRNA	Tandem
ZSDa018_Chr3_gene_107500_mRNA	Dispersed
ZSDa018_Chr2_gene_75080_mRNA	Dispersed
ZSDa018_Chr20_gene_291090_mRNA	Tandem
ZSDa018_Chr15_gene_175040_mRNA	Tandem
ZSDa018_Chr7_gene_303270_mRNA	Tandem
ZSDa018_Chr15_gene_176270_mRNA	Tandem
ZSDa018_Chr13_gene_234640_mRNA	Proximal
ZSDa018_Chr13_gene_234390_mRNA	Tandem
ZSDa018_Chr14_gene_334890_mRNA	WGD/SD
ZSDa018_Chr15_gene_181980_mRNA	WGD/SD
ZSDa018_Chr5_gene_255630_mRNA	Dispersed
ZSDa018_Chr10_gene_21050_mRNA	Tandem
ZSDa018_Chr20_gene_285650_mRNA	Dispersed
ZSDa018_Chr17_gene_9870_mRNA	Proximal
ZSDa018_Chr15_gene_175080_mRNA	Proximal
ZSDa018_Chr16_gene_141730_mRNA	WGD/SD
ZSDa018_Chr15_gene_183290_mRNA	Dispersed
ZSDa018_Chr4_gene_36240_mRNA	Tandem
ZSDa018_Chr18_gene_299590_mRNA	Dispersed
ZSDa018_Chr15_gene_189240_mRNA	WGD/SD
ZSDa018_Chr19_gene_130030_mRNA	Proximal
ZSDa018_Chr19_gene_126250_mRNA	Tandem
ZSDa018_Chr8_gene_159070_mRNA	WGD/SD
ZSDa018_Chr19_gene_130540_mRNA	Dispersed
ZSDa018_Chr3_gene_105360_mRNA	WGD/SD
ZSDa018_Chr15_gene_183720_mRNA	WGD/SD
ZSDa018_Chr4_gene_36480_mRNA	Dispersed
ZSDa018_Chr1_gene_58850_mRNA	Dispersed
ZSDa018_Chr17_gene_6490_mRNA	Proximal
ZSDa018_Chr3_gene_102290_mRNA	Dispersed
ZSDa018_Chr8_gene_92620_mRNA	Proximal
ZSDa018_Chr2_gene_69340_mRNA	Proximal
ZSDa018_Chr15_gene_181950_mRNA	Proximal
ZSDa018_Chr5_gene_266850_mRNA	Dispersed
ZSDa018_Chr2_gene_81370_mRNA	Proximal
ZSDa018_Chr5_gene_251450_mRNA	WGD/SD
ZSDa018_Chr8_gene_151100_mRNA	WGD/SD
ZSDa018_Chr11_gene_162430_mRNA	Dispersed
ZSDa018_Chr4_gene_43190_mRNA	Tandem
ZSDa018_Chr3_gene_104070_mRNA	Dispersed
ZSDa018_Chr13_gene_234360_mRNA	Proximal
ZSDa018_Chr15_gene_181990_mRNA	Tandem
ZSDa018_Chr12_gene_192060_mRNA	WGD/SD
ZSDa018_Chr16_gene_141320_mRNA	WGD/SD
ZSDa018_Chr16_gene_137260_mRNA	WGD/SD
ZSDa018_Chr8_gene_154380_mRNA	Tandem
ZSDa018_Chr5_gene_267480_mRNA	WGD/SD
ZSDa018_Chr8_gene_89100_mRNA	WGD/SD
ZSDa018_Chr18_gene_281260_mRNA	Tandem
ZSDa018_Chr9_gene_212260_mRNA	Dispersed
ZSDa018_Chr13_gene_234430_mRNA	Tandem
ZSDa018_Chr7_gene_303260_mRNA	Tandem
ZSDa018_Chr8_gene_151160_mRNA	WGD/SD
ZSDa018_Chr18_gene_273800_mRNA	Dispersed
ZSDa018_Chr3_gene_99090_mRNA	WGD/SD
ZSDa018_Chr2_gene_81430_mRNA	Proximal
ZSDa018_Chr7_gene_304140_mRNA	Dispersed
ZSDa018_Chr16_gene_141280_mRNA	WGD/SD
ZSDa018_Chr20_gene_285810_mRNA	WGD/SD
ZSDa018_Chr13_gene_234410_mRNA	Tandem
ZSDa018_Chr8_gene_91650_mRNA	WGD/SD
ZSDa018_Chr13_gene_234600_mRNA	Proximal
ZSDa018_Chr5_gene_267530_mRNA	Proximal
ZSDa018_Chr16_gene_143500_mRNA	Dispersed
ZSDa018_Chr17_gene_15360_mRNA	Dispersed
ZSDa018_Chr18_gene_297550_mRNA	Dispersed
ZSDa018_Chr1_gene_56820_mRNA	Dispersed
ZSDa018_Chr17_gene_9020_mRNA	Tandem
ZSDa018_Chr19_gene_115520_mRNA	Dispersed
ZSDa018_Chr15_gene_178140_mRNA	Dispersed
ZSDa018_Chr5_gene_267520_mRNA	Tandem
ZSDa018_Chr15_gene_191070_mRNA	Dispersed
ZSDa018_Chr17_gene_350_mRNA	Proximal
ZSDa018_Chr17_gene_3350_mRNA	Dispersed
ZSDa018_Chr17_gene_9880_mRNA	Proximal
ZSDa018_Chr18_gene_295570_mRNA	WGD/SD
ZSDa018_Chr14_gene_325410_mRNA	Dispersed
ZSDa018_Chr11_gene_167740_mRNA	Dispersed
ZSDa018_Chr19_gene_128840_mRNA	WGD/SD
ZSDa018_Chr17_gene_10290_mRNA	Proximal
ZSDa018_Chr8_gene_151140_mRNA	Tandem
ZSDa018_Chr2_gene_81400_mRNA	Tandem
ZSDa018_Chr14_gene_334360_mRNA	Dispersed
ZSDa018_Chr2_gene_69360_mRNA	Proximal
ZSDa018_Chr10_gene_22190_mRNA	Dispersed
ZSDa018_Chr15_gene_190170_mRNA	Tandem
ZSDa018_Chr5_gene_261250_mRNA	Dispersed
ZSDa018_Chr15_gene_184840_mRNA	Dispersed
ZSDa018_Chr16_gene_141310_mRNA	Dispersed
ZSDa018_Chr5_gene_260640_mRNA	Tandem
ZSDa018_Chr5_gene_250200_mRNA	Dispersed
ZSDa018_Chr5_gene_253880_mRNA	Tandem
ZSDa018_Chr15_gene_181970_mRNA	WGD/SD
ZSDa018_Chr19_gene_114970_mRNA	Tandem
ZSDa018_Chr19_gene_113260_mRNA	Dispersed
ZSDa018_Chr2_gene_72980_mRNA	Proximal
ZSDa018_Chr15_gene_175050_mRNA	Tandem
ZSDa018_Chr5_gene_260290_mRNA	Proximal
ZSDa018_Chr19_gene_126260_mRNA	Tandem
ZSDa018_Chr9_gene_211900_mRNA	Dispersed
ZSDa018_Chr8_gene_154320_mRNA	Proximal
ZSDa018_Chr17_gene_340_mRNA	Proximal
ZSDa018_Chr8_gene_151450_mRNA	WGD/SD
ZSDa018_Chr5_gene_258650_mRNA	WGD/SD
ZSDa018_Chr2_gene_73120_mRNA	Proximal
ZSDa018_Chr2_gene_77810_mRNA	Dispersed
ZSDa018_Chr8_gene_151510_mRNA	Proximal
ZSDa018_Chr20_gene_288800_mRNA	WGD/SD
ZSDa018_Chr19_gene_113510_mRNA	Tandem
ZSDa018_Chr5_gene_272220_mRNA	Dispersed
[truncated: 2,120 more rows]

## Sheet: TableS3
Name	OG
ZSDa005_Chr15_gene_267190_mRNA	1
ZSDa005_Chr15_gene_267260_mRNA	1
ZSDa005_Chr15_gene_267300_mRNA	1
ZSDa005_Chr15_gene_267340_mRNA	1
ZSDa005_Chr15_gene_267360_mRNA	1
ZSDa005_Chr15_gene_267390_mRNA	1
ZSDa005_Chr15_gene_267430_mRNA	1
ZSDa005_Chr15_gene_267450_mRNA	1
ZSDa005_Chr15_gene_267460_mRNA	1
ZSDa005_Chr15_gene_267470_mRNA	1
ZSDa005_Chr15_gene_267490_mRNA	1
ZSDa005_Chr15_gene_267500_mRNA	1
ZSDa005_Chr15_gene_267520_mRNA	1
ZSDa006_Chr15_gene_2146500_mRNA	1
ZSDa006_Chr15_gene_2146800_mRNA	1
ZSDa006_Chr15_gene_2146900_mRNA	1
ZSDa006_Chr15_gene_2147100_mRNA	1
ZSDa006_Chr15_gene_2147200_mRNA	1
ZSDa006_Chr15_gene_2148200_mRNA	1
ZSDa006_Chr15_gene_2148600_mRNA	1
ZSDa006_Chr15_gene_2148700_mRNA	1
ZSDa006_Chr15_gene_2148900_mRNA	1
ZSDa006_Chr15_gene_2149500_mRNA	1
ZSDa006_Chr15_gene_2150200_mRNA	1
ZSDa015_Chr15_gene_170730_mRNA	1
ZSDa015_Chr15_gene_170810_mRNA	1
ZSDa015_Chr15_gene_170840_mRNA	1
ZSDa015_Chr15_gene_170850_mRNA	1
ZSDa015_Chr15_gene_170860_mRNA	1
ZSDa015_Chr15_gene_170890_mRNA	1
ZSDa015_Chr15_gene_170910_mRNA	1
ZSDa015_Chr15_gene_170920_mRNA	1
ZSDa015_Chr15_gene_170940_mRNA	1
ZSDa015_Chr15_gene_170960_mRNA	1
ZSDa015_Chr15_gene_170970_mRNA	1
ZSDa015_Chr15_gene_170980_mRNA	1
ZSDa015_Chr15_gene_171000_mRNA	1
ZSDa018_Chr15_gene_181750_mRNA	1
ZSDa018_Chr15_gene_181780_mRNA	1
ZSDa018_Chr15_gene_181830_mRNA	1
ZSDa018_Chr15_gene_181870_mRNA	1
ZSDa018_Chr15_gene_181890_mRNA	1
ZSDa018_Chr15_gene_181920_mRNA	1
ZSDa018_Chr15_gene_181960_mRNA	1
ZSDa018_Chr15_gene_181970_mRNA	1
ZSDa018_Chr15_gene_181980_mRNA	1
ZSDa018_Chr15_gene_181990_mRNA	1
ZSDa019_Chr15_gene_126030__R0	1
ZSDa019_Chr15_gene_126030__R2	1
ZSDa019_Chr15_gene_126040__R0	1
ZSDa019_Chr15_gene_126070__R0	1
ZSDa019_Chr15_gene_126100__R8	1
ZSDa019_Chr15_gene_126140__R0	1
ZSDa019_Chr15_gene_126140__R1	1
ZSDa019_Chr15_gene_126140__R2	1
ZSDa019_Chr15_gene_126140__R5	1
ZSDa019_Chr15_gene_126200__R0	1
ZSDa019_Chr15_gene_126290__R0	1
ZSDa019_Chr15_gene_126290__R1	1
ZSDa022_Chr15_gene_126000_mRNA	1
ZSDa022_Chr15_gene_126030_mRNA	1
ZSDa022_Chr15_gene_126040_mRNA	1
ZSDa022_Chr15_gene_126050_mRNA	1
ZSDa022_Chr15_gene_126060_mRNA	1
ZSDa022_Chr15_gene_126100_mRNA	1
ZSDa022_Chr15_gene_126140_mRNA	1
ZSDa022_Chr15_gene_126180_mRNA	1
ZSDa022_Chr15_gene_126200_mRNA	1
ZSDa022_Chr15_gene_126220_mRNA	1
ZSDa022_Chr15_gene_126290_mRNA	1
ZSDa046_Chr15_gene_125880_mRNA	1
ZSDa046_Chr15_gene_125910_mRNA	1
ZSDa046_Chr15_gene_125930_mRNA	1
ZSDa046_Chr15_gene_125940_mRNA	1
ZSDa046_Chr15_gene_125980_mRNA	1
ZSDa046_Chr15_gene_126020_mRNA	1
ZSDa046_Chr15_gene_126030_mRNA	1
ZSDa046_Chr15_gene_126050_mRNA	1
ZSDa046_Chr15_gene_126110_mRNA	1
ZSDa046_Chr15_gene_126170_mRNA	1
ZSDa046_Chr15_gene_126210_mRNA	1
ZSDa046_Chr15_gene_126230_mRNA	1
ZSDa046_Chr15_gene_126300_mRNA	1
ZSDa046_Chr15_gene_126340_mRNA	1
ZSDa005_Chr15_gene_267210_mRNA	2
ZSDa005_Chr15_gene_267350_mRNA	2
ZSDa005_Chr15_gene_267480_mRNA	2
ZSDa006_Chr15_gene_2148300_mRNA	2
ZSDa006_Chr15_gene_2149600_mRNA	2
ZSDa006_Chr15_gene_2150300_mRNA	2
ZSDa015_Chr15_gene_170720_mRNA	2
ZSDa015_Chr15_gene_170950_mRNA	2
ZSDa018_Chr15_gene_181730_mRNA	2
ZSDa019_Chr15_gene_126270__R0	2
ZSDa019_Chr15_gene_126270__R1	2
ZSDa022_Chr15_gene_126270_mRNA	2
ZSDa046_Chr15_gene_125920_mRNA	2
ZSDa046_Chr15_gene_125990_mRNA	2
ZSDa046_Chr15_gene_126130_mRNA	2
ZSDa046_Chr15_gene_126150_mRNA	2
ZSDa046_Chr15_gene_126190_mRNA	2
ZSDa046_Chr15_gene_126330_mRNA	2
ZSDa005_Chr15_gene_266260_mRNA	3
ZSDa005_Chr15_gene_267180_mRNA	3
ZSDa005_Chr20_gene_111360_mRNA	3
ZSDa006_Chr15_gene_2147000_mRNA	3
ZSDa006_Chr15_gene_2167400_mRNA	3
ZSDa006_Chr20_gene_2943200_mRNA	3
ZSDa015_Chr20_gene_207390_mRNA	3
ZSDa018_Chr15_gene_180720_mRNA	3
ZSDa018_Chr20_gene_287090_mRNA	3
ZSDa019_Chr15_gene_127210__R0	3
ZSDa019_Chr20_gene_65790__R0	3
ZSDa022_Chr20_gene_65790_mRNA	3
ZSDa046_Chr15_gene_127440_mRNA	3
ZSDa005_Chr2_gene_152130_mRNA	4
ZSDa005_Chr2_gene_152250_mRNA	4
ZSDa005_Chr2_gene_152260_mRNA	4
ZSDa005_Chr2_gene_152350_mRNA	4
ZSDa005_Chr2_gene_152470_mRNA	4
ZSDa006_Chr14_gene_2052200_mRNA	4
ZSDa006_Chr2_gene_0240500_mRNA	4
ZSDa006_Chr2_gene_0242000_mRNA	4
ZSDa006_Chr2_gene_0243300_mRNA	4
ZSDa006_Chr2_gene_0244800_mRNA	4
ZSDa015_Chr2_gene_5000_mRNA	4
ZSDa015_Chr2_gene_5020_mRNA	4
ZSDa015_Chr2_gene_5210_mRNA	4
ZSDa015_Chr2_gene_5360_mRNA	4
ZSDa015_Chr2_gene_5410_mRNA	4
ZSDa015_Chr2_gene_5420_mRNA	4
ZSDa018_Chr2_gene_72980_mRNA	4
ZSDa018_Chr2_gene_73000_mRNA	4
ZSDa018_Chr2_gene_73050_mRNA	4
ZSDa018_Chr2_gene_73120_mRNA	4
ZSDa019_Chr2_gene_81460__R0	4
ZSDa019_Chr2_gene_81480__R0	4
ZSDa022_Chr2_gene_81460_mRNA	4
ZSDa022_Chr2_gene_81480_mRNA	4
ZSDa022_Chr2_gene_81530_mRNA	4
ZSDa046_Chr2_gene_81370_mRNA	4
ZSDa046_Chr2_gene_81380_mRNA	4
ZSDa046_Chr2_gene_81430_mRNA	4
ZSDa046_Chr2_gene_81450_mRNA	4
ZSDa005_Chr15_gene_275490_mRNA	5
ZSDa005_Chr15_gene_275540_mRNA	5
ZSDa005_Chr15_gene_275550_mRNA	5
ZSDa005_Chr15_gene_275580_mRNA	5
ZSDa006_Chr15_gene_2145300_mRNA	5
ZSDa006_Chr15_gene_2146000_mRNA	5
ZSDa015_Chr15_gene_162480_mRNA	5
ZSDa015_Chr15_gene_162530_mRNA	5
ZSDa015_Chr15_gene_162550_mRNA	5
ZSDa015_Chr15_gene_162580_mRNA	5
ZSDa018_Chr15_gene_190150_mRNA	5
ZSDa018_Chr15_gene_190200_mRNA	5
ZSDa018_Chr15_gene_190210_mRNA	5
ZSDa018_Chr15_gene_190240_mRNA	5
ZSDa019_Chr15_gene_134270__R0	5
ZSDa019_Chr15_gene_134270__R2	5
ZSDa019_Chr15_gene_134270__R7	5
ZSDa019_Chr15_gene_134300__R0	5
ZSDa019_Chr15_gene_134310__R0	5
ZSDa019_Chr15_gene_134360__R0	5
ZSDa022_Chr15_gene_134270_mRNA	5
ZSDa022_Chr15_gene_134300_mRNA	5
ZSDa022_Chr15_gene_134310_mRNA	5
ZSDa022_Chr15_gene_134360_mRNA	5
ZSDa046_Chr15_gene_134360_mRNA	5
ZSDa046_Chr15_gene_134390_mRNA	5
ZSDa046_Chr15_gene_134400_mRNA	5
ZSDa046_Chr15_gene_134450_mRNA	5
ZSDa005_Chr13_gene_294060_mRNA	6
ZSDa005_Chr13_gene_294080_mRNA	6
ZSDa005_Chr13_gene_294090_mRNA	6
ZSDa005_Chr13_gene_294110_mRNA	6
ZSDa005_Chr13_gene_294120_mRNA	6
ZSDa006_Chr13_gene_1817800_mRNA	6
ZSDa006_Chr13_gene_1817900_mRNA	6
ZSDa006_Chr13_gene_1818100_mRNA	6
ZSDa006_Chr13_gene_1818300_mRNA	6
ZSDa015_Chr13_gene_259990_mRNA	6
ZSDa015_Chr13_gene_260000_mRNA	6
ZSDa015_Chr13_gene_260010_mRNA	6
ZSDa015_Chr13_gene_260040_mRNA	6
ZSDa018_Chr13_gene_234400_mRNA	6
ZSDa018_Chr13_gene_234430_mRNA	6
ZSDa018_Chr13_gene_234440_mRNA	6
ZSDa019_Chr13_gene_224500__R0	6
ZSDa019_Chr13_gene_224530__R0	6
ZSDa019_Chr13_gene_224530__R1	6
ZSDa019_Chr13_gene_224540__R0	6
ZSDa022_Chr13_gene_224500_mRNA	6
ZSDa022_Chr13_gene_224520_mRNA	6
ZSDa022_Chr13_gene_224530_mRNA	6
ZSDa022_Chr13_gene_224540_mRNA	6
ZSDa046_Chr13_gene_226540_mRNA	6
ZSDa046_Chr13_gene_226550_mRNA	6
ZSDa046_Chr13_gene_226560_mRNA	6
ZSDa005_Chr15_gene_260410_mRNA	7
ZSDa005_Chr20_gene_103320_mRNA	7
ZSDa005_Chr20_gene_110120_mRNA	7
ZSDa006_Chr15_gene_2273500_mRNA	7
ZSDa006_Chr20_gene_2921500_mRNA	7
ZSDa006_Chr20_gene_2924400_mRNA	7
ZSDa006_Chr20_gene_2924500_mRNA	7
ZSDa015_Chr15_gene_163810_mRNA	7
ZSDa015_Chr20_gene_208070_mRNA	7
ZSDa015_Chr20_gene_214430_mRNA	7
ZSDa018_Chr15_gene_175060_mRNA	7
ZSDa018_Chr20_gene_287940_mRNA	7
ZSDa018_Chr20_gene_287960_mRNA	7
ZSDa018_Chr20_gene_294370_mRNA	7
ZSDa019_Chr15_gene_133040__R0	7
ZSDa019_Chr20_gene_66640__R0	7
ZSDa019_Chr20_gene_73350__R0	7
ZSDa022_Chr15_gene_133040_mRNA	7
ZSDa022_Chr20_gene_66640_mRNA	7
ZSDa022_Chr20_gene_66660_mRNA	7
ZSDa022_Chr20_gene_73350_mRNA	7
ZSDa046_Chr15_gene_133080_mRNA	7
ZSDa046_Chr20_gene_67040_mRNA	7
ZSDa046_Chr20_gene_73530_mRNA	7
ZSDa005_Chr8_gene_130420_mRNA	8
ZSDa005_Chr8_gene_130440_mRNA	8
ZSDa005_Chr8_gene_130450_mRNA	8
ZSDa006_Chr8_gene_1252500_mRNA	8
ZSDa006_Chr8_gene_1252600_mRNA	8
ZSDa006_Chr8_gene_1253300_mRNA	8
ZSDa015_Chr8_gene_51190_mRNA	8
ZSDa015_Chr8_gene_51220_mRNA	8
ZSDa015_Chr8_gene_51240_mRNA	8
ZSDa018_Chr8_gene_154300_mRNA	8
ZSDa018_Chr8_gene_154310_mRNA	8
ZSDa018_Chr8_gene_154340_mRNA	8
ZSDa018_Chr8_gene_154360_mRNA	8
ZSDa019_Chr8_gene_94270__R0	8
ZSDa019_Chr8_gene_94270__R1	8
ZSDa019_Chr8_gene_94300__R0	8
ZSDa022_Chr8_gene_94240_mRNA	8
ZSDa022_Chr8_gene_94270_mRNA	8
ZSDa022_Chr8_gene_94300_mRNA	8
ZSDa046_Chr8_gene_93900_mRNA	8
ZSDa046_Chr8_gene_93920_mRNA	8
ZSDa046_Chr8_gene_93930_mRNA	8
ZSDa005_Chr13_gene_294100_mRNA	9
ZSDa006_Chr13_gene_1818200_mRNA	9
ZSDa006_Chr13_gene_1818600_mRNA	9
ZSDa015_Chr13_gene_260030_mRNA	9
ZSDa018_Chr13_gene_234390_mRNA	9
ZSDa019_Chr13_gene_224480__R0	9
ZSDa022_Chr13_gene_224470_mRNA	9
ZSDa022_Chr13_gene_224510_mRNA	9
ZSDa046_Chr13_gene_226480_mRNA	9
ZSDa046_Chr13_gene_226500_mRNA	9
ZSDa046_Chr13_gene_226510_mRNA	9
ZSDa046_Chr13_gene_226520_mRNA	9
ZSDa005_Chr17_gene_57940_mRNA	10
ZSDa005_Chr17_gene_64600_mRNA	10
ZSDa006_Chr17_gene_2423600_mRNA	10
ZSDa006_Chr17_gene_2424000_mRNA	10
ZSDa006_Chr17_gene_2451400_mRNA	10
ZSDa006_Chr17_gene_2480500_mRNA	10
ZSDa015_Chr17_gene_318830_mRNA	10
ZSDa015_Chr17_gene_327320_mRNA	10
ZSDa015_Chr17_gene_327380_mRNA	10
ZSDa018_Chr17_gene_2490_mRNA	10
ZSDa018_Chr17_gene_8960_mRNA	10
ZSDa018_Chr17_gene_9020_mRNA	10
ZSDa019_Chr17_gene_183620__R0	10
ZSDa019_Chr17_gene_183670__R0	10
ZSDa019_Chr17_gene_190280__R0	10
ZSDa022_Chr17_gene_183620_mRNA	10
ZSDa022_Chr17_gene_183670_mRNA	10
ZSDa022_Chr17_gene_188210_mRNA	10
ZSDa022_Chr17_gene_190280_mRNA	10
ZSDa046_Chr17_gene_186670_mRNA	10
ZSDa046_Chr17_gene_186720_mRNA	10
ZSDa005_Chr19_gene_241880_mRNA	11
ZSDa005_Chr19_gene_241910_mRNA	11
ZSDa005_Chr19_gene_253820_mRNA	11
ZSDa006_Chr19_gene_2797500_mRNA	11
ZSDa006_Chr19_gene_2797700_mRNA	11
ZSDa006_Chr19_gene_2798200_mRNA	11
ZSDa015_Chr19_gene_137980_mRNA	11
ZSDa015_Chr19_gene_138010_mRNA	11
ZSDa015_Chr19_gene_149830_mRNA	11
ZSDa018_Chr19_gene_118360_mRNA	11
ZSDa018_Chr19_gene_118370_mRNA	11
ZSDa018_Chr19_gene_130030_mRNA	11
ZSDa019_Chr19_gene_235000__R0	11
ZSDa019_Chr19_gene_235000__R2	11
ZSDa019_Chr19_gene_246600__R3	11
ZSDa022_Chr19_gene_235000_mRNA	11
ZSDa022_Chr19_gene_246590_mRNA	11
ZSDa022_Chr19_gene_246600_mRNA	11
ZSDa046_Chr19_gene_236680_mRNA	11
ZSDa046_Chr19_gene_236710_mRNA	11
ZSDa046_Chr19_gene_248250_mRNA	11
ZSDa005_Chr19_gene_257440_mRNA	12
ZSDa005_Chr5_gene_167160_mRNA	12
ZSDa005_Chr5_gene_99890_mRNA	12
ZSDa006_Chr19_gene_2736000_mRNA	12
ZSDa006_Chr5_gene_0798700_mRNA	12
ZSDa006_Chr5_gene_0823200_mRNA	12
ZSDa015_Chr19_gene_153380_mRNA	12
ZSDa015_Chr5_gene_107570_mRNA	12
ZSDa015_Chr5_gene_119670_mRNA	12
ZSDa018_Chr19_gene_121990_mRNA	12
ZSDa018_Chr5_gene_258650_mRNA	12
ZSDa018_Chr5_gene_270490_mRNA	12
ZSDa019_Chr19_gene_243010__R0	12
ZSDa019_Chr5_gene_298050__R0	12
ZSDa019_Chr5_gene_312540__R0	12
ZSDa022_Chr19_gene_243010_mRNA	12
ZSDa022_Chr5_gene_298050_mRNA	12
ZSDa022_Chr5_gene_312540_mRNA	12
ZSDa046_Chr19_gene_244740_mRNA	12
ZSDa046_Chr5_gene_298600_mRNA	12
ZSDa046_Chr5_gene_313280_mRNA	12
ZSDa005_Chr15_gene_275510_mRNA	13
ZSDa006_Chr15_gene_2145400_mRNA	13
ZSDa015_Chr15_gene_162500_mRNA	13
ZSDa018_Chr15_gene_190170_mRNA	13
ZSDa019_Chr15_gene_134340__R0	13
ZSDa022_Chr15_gene_134340_mRNA	13
ZSDa046_Chr15_gene_134430_mRNA	13
ZSDa005_Chr8_gene_121620_mRNA	14
ZSDa005_Chr8_gene_121770_mRNA	14
ZSDa006_Chr8_gene_1228200_mRNA	14
ZSDa006_Chr8_gene_1228700_mRNA	14
ZSDa006_Chr8_gene_1230200_mRNA	14
ZSDa006_Chr8_gene_1230600_mRNA	14
ZSDa006_Chr8_gene_1231400_mRNA	14
ZSDa006_Chr8_gene_1233100_mRNA	14
ZSDa015_Chr8_gene_26840_mRNA	14
ZSDa015_Chr8_gene_26930_mRNA	14
ZSDa015_Chr8_gene_26960_mRNA	14
ZSDa018_Chr8_gene_92500_mRNA	14
ZSDa018_Chr8_gene_92590_mRNA	14
ZSDa018_Chr8_gene_92620_mRNA	14
ZSDa019_Chr8_gene_105010__R0	14
ZSDa019_Chr8_gene_105010__R1	14
ZSDa019_Chr8_gene_105100__R0	14
ZSDa022_Chr8_gene_105010_mRNA	14
ZSDa022_Chr8_gene_105100_mRNA	14
ZSDa022_Chr8_gene_105130_mRNA	14
ZSDa046_Chr8_gene_105150_mRNA	14
ZSDa005_Chr17_gene_60400_mRNA	15
ZSDa005_Chr17_gene_60470_mRNA	15
ZSDa005_Chr17_gene_60540_mRNA	15
ZSDa005_Chr17_gene_60570_mRNA	15
ZSDa006_Chr17_gene_2517200_mRNA	15
ZSDa006_Chr17_gene_2517800_mRNA	15
ZSDa006_Chr17_gene_2518700_mRNA	15
ZSDa015_Chr17_gene_314720_mRNA	15
ZSDa015_Chr17_gene_314790_mRNA	15
ZSDa015_Chr17_gene_314820_mRNA	15
ZSDa018_Chr17_gene_6490_mRNA	15
ZSDa018_Chr17_gene_6590_mRNA	15
ZSDa019_Chr17_gene_186030__R0	15
ZSDa019_Chr17_gene_186120__R0	15
ZSDa019_Chr17_gene_186120__R2	15
ZSDa022_Chr17_gene_186030_mRNA	15
ZSDa022_Chr17_gene_186120_mRNA	15
ZSDa046_Chr17_gene_189230_mRNA	15
ZSDa046_Chr17_gene_189270_mRNA	15
ZSDa015_Chr13_gene_260020_mRNA	16
ZSDa015_Chr13_gene_260050_mRNA	16
ZSDa015_Chr13_gene_260060_mRNA	16
ZSDa018_Chr13_gene_234380_mRNA	16
ZSDa019_Chr13_gene_224470__R0	16
ZSDa019_Chr13_gene_224520__R0	16
ZSDa022_Chr13_gene_224480_mRNA	16
ZSDa005_Chr12_gene_232830_mRNA	17
ZSDa005_Chr12_gene_232850_mRNA	17
ZSDa006_Chr12_gene_1774600_mRNA	17
ZSDa006_Chr12_gene_1774900_mRNA	17
ZSDa006_Chr12_gene_1775000_mRNA	17
ZSDa015_Chr12_gene_75480_mRNA	17
ZSDa015_Chr12_gene_75500_mRNA	17
ZSDa018_Chr12_gene_199770_mRNA	17
ZSDa018_Chr12_gene_199790_mRNA	17
ZSDa018_Chr12_gene_199810_mRNA	17
ZSDa019_Chr12_gene_261340__R0	17
ZSDa019_Chr12_gene_261360__R0	17
ZSDa022_Chr12_gene_261320_mRNA	17
ZSDa022_Chr12_gene_261340_mRNA	17
ZSDa022_Chr12_gene_261360_mRNA	17
ZSDa046_Chr12_gene_262810_mRNA	17
ZSDa046_Chr12_gene_262850_mRNA	17
ZSDa005_Chr8_gene_135730_mRNA	18
ZSDa005_Chr8_gene_135740_mRNA	18
ZSDa006_Chr8_gene_1158900_mRNA	18
ZSDa006_Chr8_gene_1159000_mRNA	18
ZSDa015_Chr8_gene_57170_mRNA	18
ZSDa015_Chr8_gene_57180_mRNA	18
ZSDa015_Chr8_gene_57190_mRNA	18
ZSDa018_Chr8_gene_159130_mRNA	18
ZSDa018_Chr8_gene_159140_mRNA	18
ZSDa019_Chr8_gene_99190__R0	18
ZSDa019_Chr8_gene_99200__R0	18
ZSDa019_Chr8_gene_99200__R1	18
ZSDa022_Chr8_gene_99190_mRNA	18
ZSDa022_Chr8_gene_99200_mRNA	18
ZSDa046_Chr8_gene_98990_mRNA	18
ZSDa046_Chr8_gene_99000_mRNA	18
ZSDa046_Chr8_gene_99010_mRNA	18
ZSDa005_Chr16_gene_289350_mRNA	19
ZSDa005_Chr16_gene_289360_mRNA	19
ZSDa005_Chr16_gene_289420_mRNA	19
ZSDa005_Chr16_gene_289550_mRNA	19
ZSDa015_Chr16_gene_59520_mRNA	19
ZSDa018_Chr16_gene_141410_mRNA	19
ZSDa018_Chr16_gene_141540_mRNA	19
ZSDa018_Chr16_gene_141780_mRNA	19
ZSDa018_Chr16_gene_141800_mRNA	19
ZSDa019_Chr16_gene_123470__R0	19
ZSDa022_Chr16_gene_123510_mRNA	19
ZSDa022_Chr16_gene_123550_mRNA	19
ZSDa046_Chr16_gene_123320_mRNA	19
ZSDa046_Chr16_gene_123350_mRNA	19
ZSDa046_Chr16_gene_123410_mRNA	19
ZSDa046_Chr16_gene_123510_mRNA	19
ZSDa005_Chr17_gene_55030_mRNA	20
ZSDa005_Chr17_gene_65940_mRNA	20
ZSDa006_Chr17_gene_2423500_mRNA	20
ZSDa006_Chr17_gene_2423900_mRNA	20
ZSDa015_Chr17_gene_320170_mRNA	20
ZSDa015_Chr17_gene_320200_mRNA	20
ZSDa018_Chr17_gene_1100_mRNA	20
ZSDa018_Chr17_gene_1120_mRNA	20
ZSDa019_Chr17_gene_191570__R1	20
ZSDa019_Chr17_gene_191590__R0	20
ZSDa022_Chr17_gene_191570_mRNA	20
ZSDa022_Chr17_gene_191590_mRNA	20
ZSDa046_Chr17_gene_194500_mRNA	20
ZSDa046_Chr17_gene_194510_mRNA	20
ZSDa046_Chr17_gene_194530_mRNA	20
ZSDa005_Chr2_gene_148570_mRNA	21
ZSDa005_Chr7_gene_195000_mRNA	21
ZSDa006_Chr2_gene_0181400_mRNA	21
ZSDa006_Chr7_gene_1013300_mRNA	21
ZSDa015_Chr15_gene_168680_mRNA	21
ZSDa015_Chr7_gene_297060_mRNA	21
ZSDa018_Chr2_gene_69340_mRNA	21
ZSDa018_Chr7_gene_318960_mRNA	21
ZSDa019_Chr2_gene_77730__R0	21
ZSDa019_Chr7_gene_11530__R0	21
ZSDa022_Chr2_gene_77730_mRNA	21
ZSDa022_Chr7_gene_11530_mRNA	21
ZSDa046_Chr2_gene_77600_mRNA	21
ZSDa046_Chr7_gene_13530_mRNA	21
ZSDa005_Chr3_gene_320940_mRNA	22
ZSDa005_Chr3_gene_320950_mRNA	22
ZSDa006_Chr3_gene_0285300_mRNA	22
ZSDa006_Chr3_gene_0285400_mRNA	22
ZSDa015_Chr3_gene_34090_mRNA	22
ZSDa015_Chr3_gene_34100_mRNA	22
ZSDa018_Chr3_gene_99090_mRNA	22
ZSDa018_Chr3_gene_99100_mRNA	22
ZSDa019_Chr3_gene_36540__R0	22
ZSDa019_Chr3_gene_36550__R0	22
ZSDa022_Chr3_gene_36540_mRNA	22
ZSDa022_Chr3_gene_36550_mRNA	22
ZSDa046_Chr3_gene_40280_mRNA	22
ZSDa046_Chr3_gene_40290_mRNA	22
ZSDa005_Chr17_gene_66540_mRNA	23
ZSDa006_Chr17_gene_2411800_mRNA	23
ZSDa015_Chr17_gene_320760_mRNA	23
ZSDa015_Chr17_gene_320770_mRNA	23
ZSDa015_Chr17_gene_320790_mRNA	23
ZSDa018_Chr17_gene_470_mRNA	23
ZSDa018_Chr17_gene_480_mRNA	23
ZSDa018_Chr17_gene_500_mRNA	23
ZSDa019_Chr17_gene_192150__R0	23
ZSDa019_Chr17_gene_192150__R1	23
ZSDa022_Chr17_gene_192150_mRNA	23
ZSDa022_Chr17_gene_192160_mRNA	23
ZSDa022_Chr17_gene_192180_mRNA	23
ZSDa046_Chr17_gene_195070_mRNA	23
ZSDa005_Chr9_gene_27070_mRNA	24
ZSDa005_Chr9_gene_27080_mRNA	24
ZSDa006_Chr9_gene_1401500_mRNA	24
ZSDa006_Chr9_gene_1401700_mRNA	24
ZSDa015_Chr9_gene_337190_mRNA	24
ZSDa015_Chr9_gene_337200_mRNA	24
ZSDa018_Chr9_gene_213220_mRNA	24
ZSDa018_Chr9_gene_213230_mRNA	24
ZSDa019_Chr9_gene_194750__R0	24
ZSDa019_Chr9_gene_194760__R0	24
ZSDa022_Chr9_gene_194750_mRNA	24
ZSDa022_Chr9_gene_194760_mRNA	24
ZSDa046_Chr9_gene_197610_mRNA	24
ZSDa046_Chr9_gene_197630_mRNA	24
ZSDa005_Chr14_gene_180120_mRNA	25
ZSDa005_Chr14_gene_180130_mRNA	25
ZSDa006_Chr14_gene_1995100_mRNA	25
ZSDa006_Chr14_gene_1995200_mRNA	25
ZSDa015_Chr14_gene_93240_mRNA	25
ZSDa015_Chr14_gene_93260_mRNA	25
ZSDa018_Chr14_gene_329190_mRNA	25
ZSDa018_Chr14_gene_329210_mRNA	25
ZSDa019_Chr14_gene_57820__R0	25
ZSDa019_Chr14_gene_57840__R0	25
ZSDa022_Chr14_gene_57820_mRNA	25
ZSDa022_Chr14_gene_57840_mRNA	25
ZSDa046_Chr14_gene_59230_mRNA	25
ZSDa046_Chr14_gene_59240_mRNA	25
ZSDa005_Chr15_gene_263600_mRNA	26
ZSDa005_Chr15_gene_269180_mRNA	26
ZSDa006_Chr15_gene_2213100_mRNA	26
ZSDa006_Chr15_gene_2274600_mRNA	26
ZSDa015_Chr15_gene_155930_mRNA	26
ZSDa015_Chr15_gene_166900_mRNA	26
ZSDa018_Chr15_gene_178140_mRNA	26
ZSDa018_Chr15_gene_183730_mRNA	26
ZSDa019_Chr15_gene_140820__R0	26
ZSDa019_Chr15_gene_140820__R1	26
ZSDa022_Chr15_gene_130050_mRNA	26
ZSDa022_Chr15_gene_140820_mRNA	26
ZSDa046_Chr15_gene_130020_mRNA	26
ZSDa046_Chr15_gene_140770_mRNA	26
ZSDa005_Chr15_gene_260320_mRNA	27
ZSDa005_Chr15_gene_260330_mRNA	27
ZSDa006_Chr15_gene_2275100_mRNA	27
ZSDa006_Chr15_gene_2275200_mRNA	27
ZSDa015_Chr15_gene_163680_mRNA	27
ZSDa015_Chr15_gene_163710_mRNA	27
ZSDa018_Chr15_gene_174940_mRNA	27
ZSDa018_Chr15_gene_174970_mRNA	27
ZSDa019_Chr15_gene_133180__R0	27
ZSDa019_Chr15_gene_133190__R0	27
ZSDa022_Chr15_gene_133180_mRNA	27
ZSDa022_Chr15_gene_133190_mRNA	27
ZSDa046_Chr15_gene_133250_mRNA	27
ZSDa046_Chr15_gene_133260_mRNA	27
ZSDa005_Chr15_gene_263580_mRNA	28
ZSDa005_Chr15_gene_269200_mRNA	28
ZSDa006_Chr15_gene_2213600_mRNA	28
ZSDa006_Chr15_gene_2274400_mRNA	28
ZSDa015_Chr15_gene_155950_mRNA	28
ZSDa015_Chr15_gene_166880_mRNA	28
ZSDa018_Chr15_gene_178120_mRNA	28
ZSDa018_Chr15_gene_183760_mRNA	28
ZSDa019_Chr15_gene_130070__R0	28
ZSDa019_Chr15_gene_140790__R0	28
ZSDa022_Chr15_gene_130070_mRNA	28
ZSDa022_Chr15_gene_140790_mRNA	28
ZSDa046_Chr15_gene_130040_mRNA	28
ZSDa046_Chr15_gene_140750_mRNA	28
ZSDa005_Chr16_gene_285470_mRNA	29
ZSDa005_Chr16_gene_285490_mRNA	29
ZSDa005_Chr16_gene_289410_mRNA	29
ZSDa015_Chr16_gene_59490_mRNA	29
ZSDa018_Chr16_gene_137450_mRNA	29
ZSDa018_Chr16_gene_141530_mRNA	29
ZSDa018_Chr16_gene_148620_mRNA	29
ZSDa019_Chr16_gene_119390__R0	29
ZSDa019_Chr16_gene_123550__R3	29
ZSDa022_Chr16_gene_116290_mRNA	29
ZSDa022_Chr16_gene_119390_mRNA	29
ZSDa046_Chr16_gene_119300_mRNA	29
ZSDa046_Chr16_gene_119320_mRNA	29
ZSDa046_Chr16_gene_123380_mRNA	29
ZSDa005_Chr19_gene_238100_mRNA	30
ZSDa005_Chr19_gene_238130_mRNA	30
ZSDa006_Chr19_gene_2869600_mRNA	30
ZSDa006_Chr19_gene_2869800_mRNA	30
ZSDa015_Chr19_gene_134140_mRNA	30
ZSDa015_Chr19_gene_134160_mRNA	30
ZSDa018_Chr19_gene_126260_mRNA	30
ZSDa018_Chr19_gene_126290_mRNA	30
ZSDa019_Chr19_gene_238730__R0	30
ZSDa019_Chr19_gene_238760__R0	30
ZSDa022_Chr19_gene_238730_mRNA	30
ZSDa022_Chr19_gene_238760_mRNA	30
ZSDa046_Chr19_gene_240520_mRNA	30
ZSDa046_Chr19_gene_240540_mRNA	30
ZSDa005_Chr19_gene_238110_mRNA	31
ZSDa005_Chr19_gene_238140_mRNA	31
ZSDa006_Chr19_gene_2869500_mRNA	31
ZSDa006_Chr19_gene_2869900_mRNA	31
ZSDa015_Chr19_gene_134130_mRNA	31
ZSDa015_Chr19_gene_134180_mRNA	31
ZSDa018_Chr19_gene_126250_mRNA	31
ZSDa018_Chr19_gene_126300_mRNA	31
ZSDa019_Chr19_gene_238720__R0	31
ZSDa019_Chr19_gene_238770__R0	31
ZSDa022_Chr19_gene_238720_mRNA	31
ZSDa022_Chr19_gene_238770_mRNA	31
ZSDa046_Chr19_gene_240510_mRNA	31
ZSDa046_Chr19_gene_240550_mRNA	31
ZSDa005_Chr15_gene_260440_mRNA	32
ZSDa005_Chr15_gene_260460_mRNA	32
ZSDa006_Chr15_gene_2273200_mRNA	32
ZSDa006_Chr15_gene_2273300_mRNA	32
ZSDa015_Chr15_gene_163840_mRNA	32
ZSDa015_Chr15_gene_163850_mRNA	32
ZSDa018_Chr15_gene_175090_mRNA	32
ZSDa018_Chr15_gene_175110_mRNA	32
ZSDa019_Chr15_gene_133060__R0	32
ZSDa019_Chr15_gene_133080__R0	32
ZSDa022_Chr15_gene_133060_mRNA	32
ZSDa022_Chr15_gene_133080_mRNA	32
ZSDa046_Chr15_gene_133120_mRNA	32
ZSDa046_Chr15_gene_133130_mRNA	32
ZSDa005_Chr15_gene_270430_mRNA	33
ZSDa005_Chr15_gene_270440_mRNA	33
ZSDa006_Chr15_gene_2247600_mRNA	33
ZSDa006_Chr15_gene_2247700_mRNA	33
ZSDa015_Chr15_gene_157080_mRNA	33
ZSDa015_Chr15_gene_157090_mRNA	33
ZSDa018_Chr15_gene_184860_mRNA	33
ZSDa018_Chr15_gene_184870_mRNA	33
ZSDa019_Chr15_gene_139710__R0	33
ZSDa019_Chr15_gene_139720__R0	33
ZSDa022_Chr15_gene_139710_mRNA	33
ZSDa022_Chr15_gene_139720_mRNA	33
ZSDa046_Chr15_gene_139620_mRNA	33
ZSDa046_Chr15_gene_139630_mRNA	33
ZSDa005_Chr12_gene_234410_mRNA	34
ZSDa005_Chr7_gene_198200_mRNA	34
ZSDa006_Chr12_gene_1804200_mRNA	34
ZSDa006_Chr7_gene_1132900_mRNA	34
ZSDa015_Chr12_gene_73960_mRNA	34
ZSDa015_Chr7_gene_280190_mRNA	34
ZSDa018_Chr12_gene_198120_mRNA	34
ZSDa018_Chr7_gene_302980_mRNA	34
ZSDa019_Chr12_gene_259700__R0	34
ZSDa019_Chr7_gene_14310__R0	34
ZSDa022_Chr12_gene_259700_mRNA	34
ZSDa022_Chr7_gene_14310_mRNA	34
ZSDa046_Chr12_gene_261130_mRNA	34
ZSDa046_Chr7_gene_16740_mRNA	34
ZSDa005_Chr15_gene_276070_mRNA	35
ZSDa005_Chr8_gene_136560_mRNA	35
ZSDa006_Chr15_gene_2135500_mRNA	35
ZSDa006_Chr8_gene_1144700_mRNA	35
ZSDa015_Chr15_gene_163070_mRNA	35
ZSDa015_Chr8_gene_58000_mRNA	35
ZSDa018_Chr15_gene_190700_mRNA	35
ZSDa018_Chr8_gene_159920_mRNA	35
ZSDa019_Chr15_gene_133790__R0	35
ZSDa019_Chr8_gene_99960__R0	35
ZSDa022_Chr15_gene_133790_mRNA	35
ZSDa022_Chr8_gene_99960_mRNA	35
ZSDa046_Chr15_gene_133880_mRNA	35
ZSDa046_Chr8_gene_99800_mRNA	35
ZSDa005_Chr4_gene_18550_mRNA	36
ZSDa005_Chr4_gene_7540_mRNA	36
ZSDa006_Chr4_gene_0531700_mRNA	36
ZSDa006_Chr4_gene_0531800_mRNA	36
ZSDa015_Chr4_gene_175870_mRNA	36
ZSDa015_Chr4_gene_186660_mRNA	36
ZSDa018_Chr4_gene_38390_mRNA	36
ZSDa018_Chr4_gene_49300_mRNA	36
ZSDa019_Chr4_gene_326540__R0	36
ZSDa019_Chr4_gene_326550__R1	36
ZSDa022_Chr4_gene_326540_mRNA	36
ZSDa022_Chr4_gene_326550_mRNA	36
ZSDa046_Chr4_gene_327630_mRNA	36
ZSDa046_Chr4_gene_327640_mRNA	36
ZSDa005_Chr19_gene_250340_mRNA	37
ZSDa005_Chr19_gene_250350_mRNA	37
ZSDa006_Chr19_gene_2860600_mRNA	37
ZSDa015_Chr19_gene_146520_mRNA	37
ZSDa015_Chr19_gene_146530_mRNA	37
ZSDa018_Chr19_gene_114970_mRNA	37
ZSDa018_Chr19_gene_114980_mRNA	37
ZSDa019_Chr19_gene_249960__R0	37
ZSDa019_Chr19_gene_249970__R0	37
ZSDa022_Chr19_gene_249960_mRNA	37
ZSDa022_Chr19_gene_249970_mRNA	37
ZSDa046_Chr19_gene_251560_mRNA	37
ZSDa046_Chr19_gene_251570_mRNA	37
ZSDa005_Chr5_gene_90380_mRNA	38
ZSDa006_Chr5_gene_0614900_mRNA	38
ZSDa006_Chr5_gene_0615000_mRNA	38
ZSDa015_Chr5_gene_117380_mRNA	38
ZSDa015_Chr5_gene_117390_mRNA	38
ZSDa018_Chr5_gene_260910_mRNA	38
ZSDa018_Chr5_gene_260920_mRNA	38
ZSDa019_Chr5_gene_322100__R0	38
ZSDa019_Chr5_gene_322110__R0	38
ZSDa022_Chr5_gene_322100_mRNA	38
ZSDa022_Chr5_gene_322110_mRNA	38
ZSDa046_Chr5_gene_323010_mRNA	38
ZSDa046_Chr5_gene_323020_mRNA	38
ZSDa005_Chr20_gene_112800_mRNA	39
ZSDa005_Chr4_gene_15790_mRNA	39
ZSDa006_Chr20_gene_2965700_mRNA	39
ZSDa006_Chr4_gene_0481100_mRNA	39
ZSDa015_Chr20_gene_206050_mRNA	39
ZSDa015_Chr4_gene_178580_mRNA	39
ZSDa018_Chr20_gene_285810_mRNA	39
ZSDa018_Chr4_gene_46510_mRNA	39
ZSDa019_Chr20_gene_64580__R0	39
ZSDa022_Chr20_gene_64580_mRNA	39
ZSDa022_Chr4_gene_329280_mRNA	39
ZSDa046_Chr20_gene_64950_mRNA	39
ZSDa046_Chr4_gene_330350_mRNA	39
ZSDa005_Chr13_gene_294240_mRNA	40
ZSDa006_Chr13_gene_1816500_mRNA	40
ZSDa006_Chr13_gene_1816700_mRNA	40
ZSDa015_Chr13_gene_259880_mRNA	40
ZSDa015_Chr13_gene_259900_mRNA	40
ZSDa018_Chr13_gene_234580_mRNA	40
ZSDa018_Chr13_gene_234600_mRNA	40
ZSDa019_Chr13_gene_224690__R0	40
ZSDa019_Chr13_gene_224710__R0	40
ZSDa022_Chr13_gene_224690_mRNA	40
ZSDa022_Chr13_gene_224710_mRNA	40
ZSDa046_Chr13_gene_226690_mRNA	40
ZSDa046_Chr13_gene_226710_mRNA	40
ZSDa005_Chr13_gene_294250_mRNA	41
ZSDa006_Chr13_gene_1816400_mRNA	41
ZSDa006_Chr13_gene_1816600_mRNA	41
ZSDa015_Chr13_gene_259870_mRNA	41
ZSDa015_Chr13_gene_259890_mRNA	41
ZSDa018_Chr13_gene_234590_mRNA	41
ZSDa018_Chr13_gene_234610_mRNA	41
ZSDa019_Chr13_gene_224700__R1	41
ZSDa019_Chr13_gene_224720__R0	41
ZSDa022_Chr13_gene_224700_mRNA	41
ZSDa022_Chr13_gene_224720_mRNA	41
ZSDa046_Chr13_gene_226700_mRNA	41
ZSDa046_Chr13_gene_226720_mRNA	41
ZSDa006_Chr15_gene_2183400_mRNA	42
ZSDa018_Chr15_gene_179820_mRNA	42
ZSDa019_Chr15_gene_128310__R0	42
ZSDa022_Chr15_gene_128310_mRNA	42
ZSDa046_Chr15_gene_128420_mRNA	42
ZSDa005_Chr2_gene_144610_mRNA	43
ZSDa006_Chr2_gene_0249500_mRNA	43
ZSDa015_Chr2_gene_12830_mRNA	43
ZSDa018_Chr2_gene_81360_mRNA	43
ZSDa018_Chr2_gene_81370_mRNA	43
ZSDa018_Chr2_gene_81400_mRNA	43
ZSDa018_Chr2_gene_81420_mRNA	43
ZSDa019_Chr2_gene_89920__R0	43
ZSDa022_Chr2_gene_89900_mRNA	43
ZSDa022_Chr2_gene_89920_mRNA	43
ZSDa022_Chr2_gene_89930_mRNA	43
ZSDa046_Chr2_gene_89530_mRNA	43
ZSDa006_Chr12_gene_1779200_mRNA	44
ZSDa006_Chr12_gene_1779300_mRNA	44
ZSDa015_Chr12_gene_75300_mRNA	44
ZSDa015_Chr12_gene_75310_mRNA	44
ZSDa018_Chr12_gene_199590_mRNA	44
ZSDa018_Chr12_gene_199600_mRNA	44
ZSDa019_Chr12_gene_261120__R0	44
ZSDa019_Chr12_gene_261130__R0	44
ZSDa022_Chr12_gene_261120_mRNA	44
ZSDa022_Chr12_gene_261130_mRNA	44
ZSDa046_Chr12_gene_262620_mRNA	44
ZSDa046_Chr12_gene_262630_mRNA	44
ZSDa005_Chr2_gene_152480_mRNA	45
ZSDa006_Chr2_gene_0245600_mRNA	45
ZSDa015_Chr2_gene_4970_mRNA	45
ZSDa015_Chr2_gene_4980_mRNA	45
ZSDa015_Chr2_gene_5330_mRNA	45
ZSDa018_Chr2_gene_73140_mRNA	45
ZSDa019_Chr2_gene_81570__R0	45
ZSDa019_Chr2_gene_81580__R0	45
ZSDa022_Chr2_gene_81570_mRNA	45
ZSDa022_Chr2_gene_81580_mRNA	45
ZSDa046_Chr2_gene_81570_mRNA	45
ZSDa046_Chr2_gene_81580_mRNA	45
ZSDa005_Chr4_gene_20240_mRNA	46
ZSDa005_Chr4_gene_20250_mRNA	46
ZSDa006_Chr4_gene_0562700_mRNA	46
ZSDa015_Chr4_gene_174130_mRNA	46
ZSDa018_Chr4_gene_51010_mRNA	46
ZSDa018_Chr4_gene_51020_mRNA	46
ZSDa019_Chr4_gene_324800__R0	46
ZSDa019_Chr4_gene_324810__R0	46
ZSDa019_Chr4_gene_324810__R1	46
ZSDa022_Chr4_gene_324800_mRNA	46
ZSDa022_Chr4_gene_324810_mRNA	46
ZSDa046_Chr4_gene_325960_mRNA	46
ZSDa005_Chr15_gene_266840_mRNA	47
ZSDa005_Chr20_gene_107030_mRNA	47
ZSDa005_Chr20_gene_112640_mRNA	47
ZSDa006_Chr15_gene_2158100_mRNA	47
ZSDa006_Chr20_gene_2962800_mRNA	47
ZSDa006_Chr20_gene_2983800_mRNA	47
ZSDa015_Chr15_gene_170330_mRNA	47
ZSDa015_Chr20_gene_211220_mRNA	47
ZSDa018_Chr20_gene_291200_mRNA	47
ZSDa019_Chr20_gene_70160__R1	47
ZSDa046_Chr15_gene_126750_mRNA	47
ZSDa046_Chr20_gene_70310_mRNA	47
ZSDa005_Chr17_gene_57030_mRNA	48
ZSDa005_Chr17_gene_57060_mRNA	48
ZSDa006_Chr17_gene_2437600_mRNA	48
ZSDa006_Chr17_gene_2437900_mRNA	48
ZSDa015_Chr17_gene_326490_mRNA	48
ZSDa018_Chr17_gene_9870_mRNA	48
ZSDa018_Chr17_gene_9880_mRNA	48
ZSDa019_Chr17_gene_182770__R0	48
ZSDa019_Chr17_gene_182810__R0	48
ZSDa022_Chr17_gene_182770_mRNA	48
ZSDa022_Chr17_gene_182810_mRNA	48
ZSDa046_Chr17_gene_185810_mRNA	48
ZSDa005_Chr2_gene_152300_mRNA	49
ZSDa006_Chr2_gene_0240800_mRNA	49
ZSDa006_Chr2_gene_0241500_mRNA	49
ZSDa006_Chr2_gene_0242700_mRNA	49
ZSDa006_Chr2_gene_0243900_mRNA	49
ZSDa006_Chr2_gene_0244300_mRNA	49
ZSDa015_Chr2_gene_5160_mRNA	49
ZSDa015_Chr2_gene_5220_mRNA	49
ZSDa018_Chr2_gene_73040_mRNA	49
ZSDa046_Chr2_gene_81440_mRNA	49
ZSDa046_Chr2_gene_81480_mRNA	49
ZSDa005_Chr2_gene_152430_mRNA	50
ZSDa006_Chr2_gene_0241100_mRNA	50
ZSDa006_Chr2_gene_0244600_mRNA	50
ZSDa015_Chr2_gene_5030_mRNA	50
ZSDa015_Chr2_gene_5170_mRNA	50
ZSDa015_Chr2_gene_5240_mRNA	50
ZSDa015_Chr2_gene_5370_mRNA	50
ZSDa018_Chr2_gene_73060_mRNA	50
ZSDa019_Chr2_gene_81540__R0	50
ZSDa022_Chr2_gene_81540_mRNA	50
ZSDa046_Chr2_gene_81460_mRNA	50
ZSDa005_Chr5_gene_97320_mRNA	51
ZSDa005_Chr5_gene_97330_mRNA	51
ZSDa006_Chr5_gene_0744600_mRNA	51
ZSDa015_Chr5_gene_110210_mRNA	51
ZSDa015_Chr5_gene_110220_mRNA	51
ZSDa018_Chr5_gene_267930_mRNA	51
ZSDa018_Chr5_gene_267940_mRNA	51
ZSDa019_Chr5_gene_315110__R0	51
ZSDa022_Chr5_gene_315110_mRNA	51
ZSDa022_Chr5_gene_315120_mRNA	51
ZSDa046_Chr5_gene_315890_mRNA	51
ZSDa005_Chr15_gene_260710_mRNA	52
ZSDa006_Chr15_gene_2268100_mRNA	52
ZSDa015_Chr15_gene_164100_mRNA	52
ZSDa018_Chr15_gene_175360_mRNA	52
ZSDa018_Chr15_gene_175380_mRNA	52
ZSDa019_Chr15_gene_132800__R0	52
ZSDa019_Chr15_gene_132820__R0	52
ZSDa022_Chr15_gene_132800_mRNA	52
ZSDa022_Chr15_gene_132820_mRNA	52
ZSDa046_Chr15_gene_132850_mRNA	52
ZSDa046_Chr15_gene_132860_mRNA	52
ZSDa005_Chr13_gene_294200_mRNA	53
ZSDa006_Chr13_gene_1817000_mRNA	53
ZSDa015_Chr13_gene_259910_mRNA	53
ZSDa018_Chr13_gene_234530_mRNA	53
ZSDa019_Chr13_gene_224630__R0	53
ZSDa022_Chr13_gene_224630_mRNA	53
ZSDa046_Chr13_gene_226640_mRNA	53
ZSDa005_Chr1_gene_342360_mRNA	54
ZSDa006_Chr1_gene_0024800_mRNA	54
ZSDa006_Chr1_gene_0044900_mRNA	54
ZSDa006_Chr7_gene_0971300_mRNA	54
ZSDa006_Chr7_gene_1036900_mRNA	54
ZSDa015_Chr1_gene_216480_mRNA	54
ZSDa018_Chr1_gene_58260_mRNA	54
ZSDa019_Chr1_gene_160190__R0	54
ZSDa022_Chr1_gene_160190_mRNA	54
ZSDa046_Chr1_gene_160660_mRNA	54
ZSDa005_Chr5_gene_93520_mRNA	55
ZSDa006_Chr5_gene_0677200_mRNA	55
ZSDa015_Chr5_gene_114020_mRNA	55
ZSDa018_Chr5_gene_264120_mRNA	55
ZSDa018_Chr5_gene_264150_mRNA	55
ZSDa019_Chr15_gene_318980__R1	55
ZSDa019_Chr18_gene_318980__R0	55
ZSDa022_Chr5_gene_318950_mRNA	55
ZSDa022_Chr5_gene_318980_mRNA	55
ZSDa046_Chr5_gene_319670_mRNA	55
ZSDa005_Chr4_gene_2360_mRNA	56
ZSDa005_Chr5_gene_96910_mRNA	56
ZSDa006_Chr5_gene_0737600_mRNA	56
ZSDa015_Chr5_gene_110630_mRNA	56
ZSDa018_Chr4_gene_33050_mRNA	56
ZSDa018_Chr5_gene_267520_mRNA	56
ZSDa019_Chr4_gene_342700__R0	56
ZSDa019_Chr5_gene_315560__R0	56
ZSDa022_Chr5_gene_315560_mRNA	56
ZSDa046_Chr5_gene_316300_mRNA	56
ZSDa005_Chr16_gene_289380_mRNA	57
ZSDa005_Chr16_gene_289440_mRNA	57
ZSDa015_Chr16_gene_59500_mRNA	57
ZSDa018_Chr16_gene_141320_mRNA	57
ZSDa018_Chr16_gene_141610_mRNA	57
ZSDa018_Chr16_gene_141700_mRNA	57
ZSDa019_Chr16_gene_123420__R0	57
ZSDa022_Chr16_gene_123500_mRNA	57
ZSDa046_Chr16_gene_123370_mRNA	57
ZSDa046_Chr16_gene_123400_mRNA	57
ZSDa005_Chr15_gene_269430_mRNA	58
ZSDa005_Chr15_gene_269440_mRNA	58
ZSDa006_Chr15_gene_2268600_mRNA	58
ZSDa006_Chr15_gene_2269100_mRNA	58
ZSDa015_Chr15_gene_156180_mRNA	58
ZSDa015_Chr15_gene_156190_mRNA	58
ZSDa018_Chr15_gene_183980_mRNA	58
ZSDa019_Chr15_gene_140570__R0	58
ZSDa022_Chr15_gene_140570_mRNA	58
ZSDa046_Chr15_gene_140520_mRNA	58
ZSDa005_Chr7_gene_194660_mRNA	59
ZSDa006_Chr7_gene_1018800_mRNA	59
ZSDa015_Chr7_gene_296740_mRNA	59
ZSDa015_Chr7_gene_296750_mRNA	59
ZSDa018_Chr7_gene_309250_mRNA	59
ZSDa018_Chr7_gene_318650_mRNA	59
ZSDa018_Chr7_gene_318660_mRNA	59
ZSDa019_Chr7_gene_11250__R0	59
ZSDa022_Chr7_gene_11250_mRNA	59
ZSDa046_Chr7_gene_13290_mRNA	59
ZSDa005_Chr8_gene_135760_mRNA	60
ZSDa005_Chr8_gene_135780_mRNA	60
ZSDa006_Chr8_gene_1158600_mRNA	60
ZSDa006_Chr8_gene_1158800_mRNA	60
ZSDa015_Chr8_gene_57210_mRNA	60
ZSDa018_Chr8_gene_159160_mRNA	60
ZSDa019_Chr8_gene_99220__R0	60
ZSDa019_Chr8_gene_99220__R1	60
ZSDa022_Chr8_gene_99220_mRNA	60
ZSDa046_Chr8_gene_99030_mRNA	60
ZSDa005_Chr2_gene_144620_mRNA	61
ZSDa006_Chr2_gene_0249400_mRNA	61
ZSDa015_Chr2_gene_12840_mRNA	61
ZSDa018_Chr2_gene_81380_mRNA	61
ZSDa018_Chr2_gene_81410_mRNA	61
ZSDa018_Chr2_gene_81430_mRNA	61
ZSDa019_Chr2_gene_89920__R2	61
ZSDa022_Chr2_gene_89910_mRNA	61
ZSDa046_Chr2_gene_89540_mRNA	61
ZSDa005_Chr7_gene_198510_mRNA	62
ZSDa005_Chr7_gene_198530_mRNA	62
ZSDa006_Chr7_gene_1127800_mRNA	62
ZSDa015_Chr7_gene_280490_mRNA	62
ZSDa018_Chr7_gene_303280_mRNA	62
ZSDa019_Chr7_gene_14620__R0	62
ZSDa022_Chr7_gene_14620_mRNA	62
ZSDa046_Chr7_gene_17030_mRNA	62
ZSDa046_Chr7_gene_17070_mRNA	62
ZSDa005_Chr7_gene_198490_mRNA	63
ZSDa006_Chr7_gene_1128100_mRNA	63
ZSDa006_Chr7_gene_1128300_mRNA	63
ZSDa015_Chr7_gene_280470_mRNA	63
ZSDa018_Chr7_gene_303260_mRNA	63
ZSDa019_Chr7_gene_14600__R0	63
ZSDa022_Chr7_gene_14600_mRNA	63
ZSDa046_Chr7_gene_17020_mRNA	63
ZSDa046_Chr7_gene_17040_mRNA	63
ZSDa005_Chr5_gene_90400_mRNA	64
ZSDa006_Chr5_gene_0615100_mRNA	64
ZSDa015_Chr5_gene_117370_mRNA	64
ZSDa018_Chr5_gene_260930_mRNA	64
ZSDa019_Chr5_gene_322090__R0	64
ZSDa022_Chr5_gene_322090_mRNA	64
ZSDa046_Chr5_gene_322970_mRNA	64
ZSDa046_Chr5_gene_322980_mRNA	64
ZSDa046_Chr5_gene_323000_mRNA	64
ZSDa005_Chr7_gene_198220_mRNA	65
ZSDa005_Chr7_gene_198230_mRNA	65
ZSDa006_Chr7_gene_1132600_mRNA	65
ZSDa015_Chr7_gene_280210_mRNA	65
ZSDa018_Chr7_gene_303000_mRNA	65
ZSDa019_Chr7_gene_14340__R0	65
ZSDa022_Chr7_gene_14320_mRNA	65
ZSDa022_Chr7_gene_14340_mRNA	65
ZSDa046_Chr7_gene_16760_mRNA	65
ZSDa005_Chr16_gene_289430_mRNA	66
ZSDa005_Chr16_gene_289480_mRNA	66
ZSDa015_Chr16_gene_59450_mRNA	66
ZSDa018_Chr16_gene_141430_mRNA	66
ZSDa018_Chr16_gene_141810_mRNA	66
ZSDa022_Chr16_gene_123590_mRNA	66
ZSDa022_Chr16_gene_123620_mRNA	66
ZSDa046_Chr16_gene_123360_mRNA	66
ZSDa046_Chr16_gene_123450_mRNA	66
ZSDa005_Chr20_gene_107050_mRNA	67
ZSDa006_Chr20_gene_2984100_mRNA	67
ZSDa015_Chr20_gene_211200_mRNA	67
ZSDa018_Chr20_gene_291180_mRNA	67
ZSDa019_Chr20_gene_70160__R0	67
ZSDa022_Chr20_gene_70150_mRNA	67
ZSDa022_Chr20_gene_70160_mRNA	67
ZSDa046_Chr20_gene_70290_mRNA	67
ZSDa046_Chr20_gene_70330_mRNA	67
ZSDa005_Chr15_gene_275520_mRNA	68
ZSDa015_Chr15_gene_162510_mRNA	68
ZSDa018_Chr15_gene_190180_mRNA	68
ZSDa022_Chr15_gene_134330_mRNA	68
ZSDa046_Chr15_gene_134420_mRNA	68
ZSDa046_Chr15_gene_134440_mRNA	68
ZSDa005_Chr16_gene_277520_mRNA	69
ZSDa005_Chr16_gene_277530_mRNA	69
ZSDa006_Chr16_gene_2390400_mRNA	69
ZSDa006_Chr16_gene_2390500_mRNA	69
ZSDa015_Chr16_gene_72260_mRNA	69
ZSDa018_Chr16_gene_143500_mRNA	69
ZSDa019_Chr16_gene_110860__R0	69
ZSDa022_Chr16_gene_110860_mRNA	69
ZSDa046_Chr16_gene_110950_mRNA	69
ZSDa005_Chr15_gene_273440_mRNA	70
ZSDa006_Chr15_gene_2184700_mRNA	70
ZSDa015_Chr15_gene_160270_mRNA	70
ZSDa015_Chr15_gene_160290_mRNA	70
ZSDa018_Chr15_gene_188070_mRNA	70
ZSDa019_Chr15_gene_136540__R0	70
ZSDa022_Chr15_gene_136520_mRNA	70
ZSDa022_Chr15_gene_136540_mRNA	70
ZSDa046_Chr15_gene_136580_mRNA	70
ZSDa005_Chr5_gene_159950_mRNA	71
ZSDa006_Chr5_gene_0681100_mRNA	71
ZSDa015_Chr5_gene_126860_mRNA	71
ZSDa018_Chr5_gene_251450_mRNA	71
ZSDa019_Chr5_gene_305240__R0	71
ZSDa022_Chr5_gene_305240_mRNA	71
ZSDa046_Chr5_gene_305970_mRNA	71
ZSDa046_Chr5_gene_305980_mRNA	71
ZSDa005_Chr5_gene_163510_mRNA	72
ZSDa006_Chr5_gene_0753900_mRNA	72
ZSDa015_Chr5_gene_123350_mRNA	72
ZSDa018_Chr5_gene_254980_mRNA	72
ZSDa019_Chr5_gene_301720__R0	72
ZSDa022_Chr5_gene_301720_mRNA	72
ZSDa046_Chr5_gene_302330_mRNA	72
ZSDa046_Chr5_gene_302340_mRNA	72
ZSDa005_Chr2_gene_144070_mRNA	73
ZSDa006_Chr2_gene_0238200_mRNA	73
ZSDa015_Chr2_gene_13440_mRNA	73
ZSDa018_Chr2_gene_80840_mRNA	73
ZSDa019_Chr2_gene_89410__R0	73
ZSDa022_Chr2_gene_89410_mRNA	73
ZSDa046_Chr2_gene_89050_mRNA	73
ZSDa046_Chr2_gene_89080_mRNA	73
ZSDa005_Chr7_gene_198480_mRNA	74
ZSDa006_Chr7_gene_1128200_mRNA	74
ZSDa006_Chr7_gene_1128400_mRNA	74
ZSDa015_Chr7_gene_280460_mRNA	74
ZSDa018_Chr7_gene_303250_mRNA	74
ZSDa019_Chr7_gene_14590__R0	74
ZSDa022_Chr7_gene_14590_mRNA	74
ZSDa046_Chr7_gene_17010_mRNA	74
ZSDa005_Chr5_gene_102240_mRNA	75
ZSDa006_Chr5_gene_0844000_mRNA	75
ZSDa006_Chr5_gene_0844100_mRNA	75
ZSDa015_Chr5_gene_105240_mRNA	75
ZSDa018_Chr5_gene_272840_mRNA	75
ZSDa019_Chr5_gene_310120__R0	75
ZSDa022_Chr5_gene_310120_mRNA	75
ZSDa046_Chr5_gene_310890_mRNA	75
ZSDa005_Chr8_gene_117060_mRNA	76
ZSDa006_Chr8_gene_1318100_mRNA	76
ZSDa015_Chr8_gene_22220_mRNA	76
ZSDa018_Chr8_gene_88060_mRNA	76
ZSDa019_Chr8_gene_100490__R0	76
ZSDa022_Chr8_gene_100490_mRNA	76
ZSDa046_Chr8_gene_100360_mRNA	76
ZSDa046_Chr8_gene_100600_mRNA	76
ZSDa005_Chr5_gene_96930_mRNA	77
ZSDa015_Chr5_gene_110610_mRNA	77
ZSDa018_Chr5_gene_267540_mRNA	77
ZSDa019_Chr4_gene_342850__R0	77
ZSDa019_Chr5_gene_315530__R0	77
ZSDa022_Chr5_gene_315530_mRNA	77
ZSDa046_Chr4_gene_343610_mRNA	77
ZSDa046_Chr5_gene_316290_mRNA	77
ZSDa015_Chr16_gene_59470_mRNA	78
ZSDa018_Chr16_gene_141720_mRNA	78
ZSDa019_Chr16_gene_123570__R0	78
ZSDa022_Chr16_gene_123450_mRNA	78
ZSDa046_Chr16_gene_123330_mRNA	78
ZSDa005_Chr8_gene_126960_mRNA	79
ZSDa006_Chr8_gene_1321600_mRNA	79
ZSDa015_Chr8_gene_47930_mRNA	79
ZSDa018_Chr8_gene_150850_mRNA	79
ZSDa019_Chr8_gene_90810__R0	79
ZSDa022_Chr8_gene_90810_mRNA	79
ZSDa046_Chr8_gene_90300_mRNA	79
ZSDa046_Chr8_gene_90600_mRNA	79
ZSDa005_Chr19_gene_245020_mRNA	80
ZSDa006_Chr19_gene_2744900_mRNA	80
ZSDa015_Chr19_gene_140990_mRNA	80
ZSDa018_Chr19_gene_133330_mRNA	80
ZSDa019_Chr19_gene_231930__R0	80
ZSDa019_Chr19_gene_231930__R1	80
ZSDa022_Chr19_gene_231930_mRNA	80
ZSDa046_Chr19_gene_233680_mRNA	80
ZSDa005_Chr15_gene_267220_mRNA	81
ZSDa005_Chr15_gene_267250_mRNA	81
ZSDa006_Chr15_gene_2150400_mRNA	81
ZSDa015_Chr15_gene_170740_mRNA	81
ZSDa018_Chr15_gene_181740_mRNA	81
ZSDa019_Chr15_gene_126280__R0	81
ZSDa022_Chr15_gene_126280_mRNA	81
ZSDa046_Chr15_gene_126120_mRNA	81
ZSDa005_Chr8_gene_124250_mRNA	82
ZSDa006_Chr8_gene_1187300_mRNA	82
ZSDa015_Chr8_gene_30150_mRNA	82
ZSDa015_Chr8_gene_30230_mRNA	82
ZSDa018_Chr8_gene_95110_mRNA	82
ZSDa019_Chr14_gene_107540__R0	82
ZSDa022_Chr8_gene_107540_mRNA	82
ZSDa046_Chr8_gene_107690_mRNA	82
ZSDa005_Chr13_gene_294260_mRNA	83
ZSDa006_Chr13_gene_1816300_mRNA	83
ZSDa015_Chr13_gene_259860_mRNA	83
ZSDa018_Chr13_gene_234630_mRNA	83
ZSDa019_Chr13_gene_224730__R0	83
ZSDa019_Chr13_gene_224730__R2	83
ZSDa022_Chr13_gene_224730_mRNA	83
ZSDa046_Chr13_gene_226730_mRNA	83
ZSDa005_Chr13_gene_294270_mRNA	84
ZSDa006_Chr13_gene_1816200_mRNA	84
ZSDa015_Chr13_gene_259850_mRNA	84
ZSDa018_Chr13_gene_234640_mRNA	84
ZSDa019_Chr13_gene_224740__R0	84
ZSDa019_Chr13_gene_224740__R1	84
ZSDa022_Chr13_gene_224740_mRNA	84
ZSDa046_Chr13_gene_226740_mRNA	84
ZSDa005_Chr14_gene_186040_mRNA	85
ZSDa006_Chr14_gene_2107900_mRNA	85
ZSDa015_Chr14_gene_87630_mRNA	85
ZSDa018_Chr14_gene_322850_mRNA	85
ZSDa019_Chr14_gene_51820__R0	85
ZSDa022_Chr14_gene_51820_mRNA	85
ZSDa046_Chr14_gene_53750_mRNA	85
ZSDa005_Chr5_gene_164150_mRNA	86
ZSDa006_Chr5_gene_0765500_mRNA	86
ZSDa015_Chr5_gene_122720_mRNA	86
ZSDa018_Chr5_gene_255630_mRNA	86
ZSDa019_Chr5_gene_301100__R0	86
ZSDa022_Chr5_gene_301100_mRNA	86
ZSDa046_Chr5_gene_301710_mRNA	86
ZSDa005_Chr3_gene_330180_mRNA	87
ZSDa006_Chr3_gene_0326300_mRNA	87
ZSDa015_Chr3_gene_44230_mRNA	87
ZSDa018_Chr3_gene_108510_mRNA	87
ZSDa019_Chr3_gene_47250__R0	87
ZSDa022_Chr3_gene_47250_mRNA	87
ZSDa046_Chr3_gene_49810_mRNA	87
ZSDa005_Chr2_gene_145740_mRNA	88
ZSDa006_Chr2_gene_0137200_mRNA	88
ZSDa015_Chr2_gene_11790_mRNA	88
ZSDa018_Chr2_gene_66650_mRNA	88
ZSDa019_Chr2_gene_75130__R0	88
ZSDa022_Chr2_gene_75130_mRNA	88
ZSDa046_Chr2_gene_75090_mRNA	88
ZSDa005_Chr13_gene_293980_mRNA	89
ZSDa006_Chr13_gene_1820400_mRNA	89
ZSDa015_Chr13_gene_260140_mRNA	89
ZSDa018_Chr13_gene_234300_mRNA	89
ZSDa019_Chr13_gene_224390__R0	89
ZSDa022_Chr13_gene_224390_mRNA	89
ZSDa046_Chr13_gene_226400_mRNA	89
ZSDa005_Chr10_gene_46150_mRNA	90
ZSDa006_Chr10_gene_1532900_mRNA	90
ZSDa015_Chr10_gene_238950_mRNA	90
ZSDa018_Chr10_gene_20580_mRNA	90
ZSDa019_Chr10_gene_172300__R0	90
ZSDa022_Chr10_gene_172300_mRNA	90
ZSDa046_Chr10_gene_174490_mRNA	90
ZSDa005_Chr17_gene_58080_mRNA	91
ZSDa006_Chr17_gene_2422500_mRNA	91
ZSDa015_Chr17_gene_327440_mRNA	91
ZSDa018_Chr17_gene_8900_mRNA	91
ZSDa019_Chr17_gene_183730__R0	91
ZSDa022_Chr17_gene_183730_mRNA	91
ZSDa046_Chr17_gene_186810_mRNA	91
ZSDa005_Chr8_gene_129050_mRNA	92
ZSDa006_Chr8_gene_1282200_mRNA	92
ZSDa015_Chr8_gene_49950_mRNA	92
ZSDa018_Chr8_gene_152900_mRNA	92
ZSDa019_Chr8_gene_92820__R0	92
ZSDa022_Chr8_gene_92820_mRNA	92
ZSDa046_Chr8_gene_92620_mRNA	92
ZSDa005_Chr15_gene_271820_mRNA	93
ZSDa006_Chr15_gene_2221500_mRNA	93
ZSDa015_Chr15_gene_158440_mRNA	93
ZSDa018_Chr15_gene_186220_mRNA	93
ZSDa019_Chr15_gene_138340__R0	93
ZSDa022_Chr15_gene_138340_mRNA	93
ZSDa046_Chr15_gene_138250_mRNA	93
ZSDa005_Chr2_gene_142640_mRNA	94
ZSDa006_Chr2_gene_0214300_mRNA	94
ZSDa015_Chr2_gene_14720_mRNA	94
ZSDa018_Chr2_gene_79680_mRNA	94
ZSDa019_Chr2_gene_88190__R0	94
ZSDa022_Chr2_gene_88190_mRNA	94
ZSDa046_Chr2_gene_87880_mRNA	94
ZSDa005_Chr11_gene_220580_mRNA	95
ZSDa006_Chr11_gene_1669400_mRNA	95
ZSDa015_Chr11_gene_305620_mRNA	95
ZSDa018_Chr11_gene_168250_mRNA	95
ZSDa019_Chr11_gene_147360__R0	95
ZSDa022_Chr11_gene_147360_mRNA	95
ZSDa046_Chr11_gene_147790_mRNA	95
ZSDa005_Chr5_gene_95180_mRNA	96
ZSDa006_Chr5_gene_0706800_mRNA	96
ZSDa015_Chr5_gene_112340_mRNA	96
ZSDa018_Chr5_gene_265790_mRNA	96
ZSDa019_Chr5_gene_317330__R0	96
ZSDa022_Chr5_gene_317330_mRNA	96
ZSDa046_Chr5_gene_318000_mRNA	96
ZSDa005_Chr20_gene_115070_mRNA	97
ZSDa006_Chr20_gene_3009000_mRNA	97
ZSDa015_Chr20_gene_203820_mRNA	97
ZSDa018_Chr20_gene_283560_mRNA	97
ZSDa019_Chr20_gene_62330__R0	97
ZSDa022_Chr20_gene_62330_mRNA	97
ZSDa046_Chr20_gene_62660_mRNA	97
ZSDa005_Chr12_gene_226790_mRNA	98
ZSDa006_Chr12_gene_1781500_mRNA	98
ZSDa015_Chr12_gene_81390_mRNA	98
ZSDa018_Chr12_gene_193220_mRNA	98
ZSDa019_Chr12_gene_254540__R0	98
ZSDa022_Chr12_gene_254540_mRNA	98
ZSDa046_Chr12_gene_256040_mRNA	98
ZSDa005_Chr7_gene_199620_mRNA	99
ZSDa006_Chr7_gene_1111000_mRNA	99
ZSDa015_Chr7_gene_281430_mRNA	99
ZSDa018_Chr7_gene_304140_mRNA	99
ZSDa019_Chr7_gene_15490__R0	99
ZSDa022_Chr7_gene_15490_mRNA	99
ZSDa046_Chr7_gene_17930_mRNA	99
ZSDa005_Chr9_gene_27590_mRNA	100
ZSDa006_Chr9_gene_1411800_mRNA	100
ZSDa015_Chr9_gene_336660_mRNA	100
ZSDa018_Chr9_gene_212690_mRNA	100
ZSDa019_Chr9_gene_194240__R0	100
ZSDa022_Chr9_gene_194240_mRNA	100
ZSDa046_Chr9_gene_197100_mRNA	100
ZSDa005_Chr18_gene_74190_mRNA	101
ZSDa006_Chr18_gene_2659800_mRNA	101
ZSDa015_Chr18_gene_264680_mRNA	101
ZSDa018_Chr18_gene_301520_mRNA	101
ZSDa019_Chr18_gene_273530__R0	101
ZSDa022_Chr18_gene_273530_mRNA	101
ZSDa046_Chr18_gene_274310_mRNA	101
ZSDa005_Chr14_gene_177870_mRNA	102
ZSDa006_Chr14_gene_1950400_mRNA	102
ZSDa015_Chr14_gene_95510_mRNA	102
ZSDa018_Chr14_gene_331530_mRNA	102
ZSDa019_Chr14_gene_60860__R0	102
ZSDa022_Chr14_gene_60860_mRNA	102
ZSDa046_Chr14_gene_61390_mRNA	102
ZSDa005_Chr14_gene_175050_mRNA	103
ZSDa006_Chr14_gene_2073200_mRNA	103
ZSDa015_Chr14_gene_98530_mRNA	103
ZSDa018_Chr14_gene_334360_mRNA	103
ZSDa019_Chr14_gene_28020__R0	103
ZSDa022_Chr14_gene_28020_mRNA	103
ZSDa046_Chr14_gene_32970_mRNA	103
ZSDa005_Chr19_gene_248670_mRNA	104
ZSDa006_Chr19_gene_2896000_mRNA	104
ZSDa015_Chr19_gene_144790_mRNA	104
ZSDa018_Chr19_gene_113260_mRNA	104
ZSDa019_Chr19_gene_251700__R0	104
ZSDa022_Chr19_gene_251700_mRNA	104
ZSDa046_Chr19_gene_253300_mRNA	104
ZSDa005_Chr3_gene_329770_mRNA	105
ZSDa005_Chr9_gene_24890_mRNA	105
ZSDa006_Chr9_gene_1368200_mRNA	105
ZSDa015_Chr3_gene_43830_mRNA	105
ZSDa018_Chr9_gene_215190_mRNA	105
ZSDa022_Chr3_gene_46670_mRNA	105
ZSDa046_Chr3_gene_49340_mRNA	105
ZSDa005_Chr8_gene_120070_mRNA	106
ZSDa006_Chr8_gene_1262100_mRNA	106
ZSDa015_Chr8_gene_25260_mRNA	106
ZSDa018_Chr8_gene_91100_mRNA	106
ZSDa019_Chr8_gene_103620__R0	106
ZSDa022_Chr8_gene_103620_mRNA	106
ZSDa046_Chr8_gene_103680_mRNA	106
ZSDa005_Chr16_gene_286410_mRNA	107
ZSDa006_Chr16_gene_2349400_mRNA	107
ZSDa015_Chr16_gene_62510_mRNA	107
ZSDa018_Chr16_gene_138460_mRNA	107
ZSDa019_Chr16_gene_120280__R0	107
ZSDa022_Chr16_gene_120280_mRNA	107
ZSDa046_Chr16_gene_120310_mRNA	107
ZSDa005_Chr18_gene_68460_mRNA	108
ZSDa006_Chr18_gene_2551000_mRNA	108
ZSDa015_Chr18_gene_270510_mRNA	108
ZSDa018_Chr18_gene_295750_mRNA	108
ZSDa019_Chr18_gene_267350__R0	108
ZSDa022_Chr18_gene_267350_mRNA	108
ZSDa046_Chr18_gene_268560_mRNA	108
ZSDa005_Chr20_gene_112960_mRNA	109
ZSDa006_Chr20_gene_2969300_mRNA	109
ZSDa015_Chr20_gene_205890_mRNA	109
ZSDa018_Chr20_gene_285650_mRNA	109
ZSDa019_Chr20_gene_64410__R0	109
ZSDa022_Chr20_gene_64410_mRNA	109
ZSDa046_Chr20_gene_64800_mRNA	109
ZSDa005_Chr17_gene_65870_mRNA	110
ZSDa006_Chr17_gene_2425300_mRNA	110
ZSDa015_Chr17_gene_320060_mRNA	110
ZSDa018_Chr17_gene_1220_mRNA	110
ZSDa019_Chr17_gene_191490__R0	110
ZSDa022_Chr17_gene_191490_mRNA	110
ZSDa046_Chr17_gene_194420_mRNA	110
ZSDa005_Chr18_gene_75310_mRNA	111
ZSDa006_Chr18_gene_2684300_mRNA	111
ZSDa015_Chr18_gene_263620_mRNA	111
ZSDa018_Chr18_gene_302610_mRNA	111
ZSDa019_Chr18_gene_274630__R0	111
ZSDa022_Chr18_gene_274630_mRNA	111
ZSDa046_Chr18_gene_275390_mRNA	111
ZSDa005_Chr17_gene_65950_mRNA	112
ZSDa006_Chr17_gene_2423400_mRNA	112
ZSDa015_Chr17_gene_320190_mRNA	112
ZSDa018_Chr17_gene_1090_mRNA	112
ZSDa019_Chr17_gene_191580__R0	112
ZSDa022_Chr17_gene_191580_mRNA	112
ZSDa046_Chr17_gene_194520_mRNA	112
ZSDa005_Chr17_gene_57860_mRNA	113
ZSDa006_Chr17_gene_2425200_mRNA	113
ZSDa015_Chr17_gene_327260_mRNA	113
ZSDa018_Chr17_gene_9110_mRNA	113
ZSDa019_Chr17_gene_183560__R0	113
ZSDa022_Chr17_gene_183560_mRNA	113
ZSDa046_Chr17_gene_186610_mRNA	113
ZSDa005_Chr17_gene_66570_mRNA	114
ZSDa006_Chr17_gene_2411500_mRNA	114
ZSDa015_Chr17_gene_320780_mRNA	114
ZSDa018_Chr17_gene_490_mRNA	114
ZSDa019_Chr17_gene_192170__R0	114
ZSDa022_Chr17_gene_192170_mRNA	114
ZSDa046_Chr17_gene_195080_mRNA	114
ZSDa005_Chr17_gene_58840_mRNA	115
ZSDa006_Chr17_gene_2409000_mRNA	115
ZSDa015_Chr17_gene_328190_mRNA	115
ZSDa018_Chr17_gene_8060_mRNA	115
ZSDa019_Chr17_gene_184550__R0	115
ZSDa022_Chr17_gene_184550_mRNA	115
ZSDa046_Chr17_gene_187610_mRNA	115
ZSDa005_Chr19_gene_243580_mRNA	116
ZSDa006_Chr19_gene_2771500_mRNA	116
ZSDa015_Chr19_gene_139610_mRNA	116
ZSDa018_Chr19_gene_131800_mRNA	116
ZSDa019_Chr19_gene_233420__R0	116
ZSDa022_Chr19_gene_233420_mRNA	116
ZSDa046_Chr19_gene_235010_mRNA	116
ZSDa005_Chr17_gene_58850_mRNA	117
ZSDa006_Chr17_gene_2408900_mRNA	117
ZSDa015_Chr17_gene_328200_mRNA	117
ZSDa018_Chr17_gene_8070_mRNA	117
ZSDa019_Chr17_gene_184560__R0	117
ZSDa022_Chr17_gene_184560_mRNA	117
ZSDa046_Chr17_gene_187620_mRNA	117
ZSDa005_Chr17_gene_66760_mRNA	118
ZSDa006_Chr17_gene_2407500_mRNA	118
ZSDa015_Chr17_gene_320960_mRNA	118
ZSDa018_Chr17_gene_310_mRNA	118
ZSDa019_Chr17_gene_192350__R0	118
ZSDa022_Chr17_gene_192350_mRNA	118
ZSDa046_Chr17_gene_195240_mRNA	118
ZSDa005_Chr17_gene_66730_mRNA	119
ZSDa006_Chr17_gene_2407800_mRNA	119
ZSDa015_Chr17_gene_320930_mRNA	119
ZSDa018_Chr17_gene_350_mRNA	119
ZSDa019_Chr17_gene_192320__R0	119
ZSDa022_Chr17_gene_192320_mRNA	119
ZSDa046_Chr17_gene_195210_mRNA	119
ZSDa005_Chr17_gene_66770_mRNA	120
ZSDa006_Chr17_gene_2407600_mRNA	120
ZSDa015_Chr17_gene_320970_mRNA	120
ZSDa018_Chr17_gene_320_mRNA	120
ZSDa019_Chr17_gene_192360__R0	120
ZSDa022_Chr17_gene_192360_mRNA	120
ZSDa046_Chr17_gene_195250_mRNA	120
ZSDa005_Chr2_gene_152730_mRNA	121
ZSDa006_Chr2_gene_0249800_mRNA	121
ZSDa015_Chr2_gene_4800_mRNA	121
ZSDa018_Chr2_gene_73390_mRNA	121
ZSDa019_Chr2_gene_81810__R0	121
ZSDa022_Chr2_gene_81810_mRNA	121
ZSDa046_Chr2_gene_81770_mRNA	121
ZSDa005_Chr2_gene_144600_mRNA	122
ZSDa006_Chr2_gene_0249300_mRNA	122
ZSDa015_Chr2_gene_12850_mRNA	122
ZSDa018_Chr2_gene_81350_mRNA	122
ZSDa019_Chr2_gene_89880__R0	122
ZSDa022_Chr2_gene_89880_mRNA	122
ZSDa046_Chr2_gene_89520_mRNA	122
ZSDa005_Chr12_gene_233060_mRNA	123
ZSDa006_Chr12_gene_1779400_mRNA	123
ZSDa015_Chr12_gene_75290_mRNA	123
ZSDa018_Chr12_gene_199580_mRNA	123
ZSDa019_Chr12_gene_261110__R0	123
ZSDa022_Chr12_gene_261110_mRNA	123
ZSDa046_Chr12_gene_262610_mRNA	123
ZSDa005_Chr11_gene_221510_mRNA	124
ZSDa006_Chr11_gene_1688300_mRNA	124
ZSDa015_Chr11_gene_306550_mRNA	124
ZSDa018_Chr11_gene_167300_mRNA	124
ZSDa019_Chr11_gene_148310__R0	124
ZSDa022_Chr11_gene_148310_mRNA	124
ZSDa046_Chr11_gene_148720_mRNA	124
ZSDa005_Chr2_gene_144080_mRNA	125
ZSDa006_Chr2_gene_0238300_mRNA	125
ZSDa015_Chr2_gene_13430_mRNA	125
ZSDa018_Chr2_gene_80850_mRNA	125
ZSDa019_Chr2_gene_89420__R0	125
ZSDa022_Chr2_gene_89420_mRNA	125
ZSDa046_Chr2_gene_89060_mRNA	125
ZSDa005_Chr2_gene_144060_mRNA	126
ZSDa006_Chr2_gene_0237900_mRNA	126
ZSDa015_Chr2_gene_13450_mRNA	126
ZSDa018_Chr2_gene_80830_mRNA	126
ZSDa019_Chr2_gene_89400__R0	126
ZSDa022_Chr2_gene_89400_mRNA	126
ZSDa046_Chr2_gene_89040_mRNA	126
ZSDa005_Chr9_gene_31920_mRNA	127
ZSDa006_Chr9_gene_1371300_mRNA	127
ZSDa015_Chr9_gene_332210_mRNA	127
ZSDa018_Chr9_gene_208170_mRNA	127
ZSDa019_Chr9_gene_202410__R0	127
ZSDa022_Chr9_gene_202410_mRNA	127
ZSDa046_Chr9_gene_205100_mRNA	127
ZSDa005_Chr2_gene_144090_mRNA	128
ZSDa006_Chr2_gene_0238400_mRNA	128
ZSDa015_Chr2_gene_13420_mRNA	128
ZSDa018_Chr2_gene_80870_mRNA	128
ZSDa019_Chr2_gene_89430__R0	128
ZSDa022_Chr2_gene_89430_mRNA	128
ZSDa046_Chr2_gene_89070_mRNA	128
ZSDa005_Chr2_gene_144100_mRNA	129
ZSDa006_Chr2_gene_0238600_mRNA	129
ZSDa015_Chr2_gene_13410_mRNA	129
ZSDa018_Chr2_gene_80860_mRNA	129
ZSDa019_Chr2_gene_89440__R0	129
ZSDa022_Chr2_gene_89440_mRNA	129
ZSDa046_Chr2_gene_89090_mRNA	129
ZSDa005_Chr2_gene_148670_mRNA	130
ZSDa006_Chr2_gene_0183100_mRNA	130
ZSDa015_Chr2_gene_8960_mRNA	130
ZSDa018_Chr2_gene_69470_mRNA	130
ZSDa019_Chr2_gene_77840__R0	130
ZSDa022_Chr2_gene_77840_mRNA	130
ZSDa046_Chr2_gene_77730_mRNA	130
ZSDa005_Chr14_gene_173480_mRNA	131
ZSDa006_Chr14_gene_2044200_mRNA	131
ZSDa015_Chr14_gene_100000_mRNA	131
ZSDa018_Chr14_gene_335850_mRNA	131
ZSDa019_Chr14_gene_29470__R0	131
ZSDa022_Chr14_gene_29470_mRNA	131
ZSDa046_Chr14_gene_34430_mRNA	131
ZSDa005_Chr3_gene_324180_mRNA	132
ZSDa006_Chr3_gene_0341800_mRNA	132
ZSDa015_Chr3_gene_37500_mRNA	132
ZSDa018_Chr3_gene_102290_mRNA	132
ZSDa019_Chr3_gene_40300__R0	132
ZSDa022_Chr3_gene_40300_mRNA	132
ZSDa046_Chr3_gene_43470_mRNA	132
ZSDa005_Chr9_gene_25480_mRNA	133
ZSDa006_Chr9_gene_1376900_mRNA	133
ZSDa015_Chr9_gene_338570_mRNA	133
ZSDa018_Chr9_gene_214660_mRNA	133
ZSDa019_Chr9_gene_196190__R0	133
ZSDa022_Chr9_gene_196190_mRNA	133
ZSDa046_Chr9_gene_199160_mRNA	133
ZSDa005_Chr15_gene_262570_mRNA	134
ZSDa006_Chr15_gene_2232200_mRNA	134
ZSDa015_Chr15_gene_165870_mRNA	134
ZSDa018_Chr15_gene_177090_mRNA	134
ZSDa019_Chr15_gene_131120__R0	134
ZSDa022_Chr15_gene_131120_mRNA	134
ZSDa046_Chr15_gene_131080_mRNA	134
ZSDa005_Chr5_gene_163790_mRNA	135
ZSDa006_Chr5_gene_0758700_mRNA	135
ZSDa015_Chr5_gene_123090_mRNA	135
ZSDa018_Chr5_gene_255270_mRNA	135
ZSDa019_Chr5_gene_301460__R0	135
ZSDa022_Chr5_gene_301460_mRNA	135
ZSDa046_Chr5_gene_302070_mRNA	135
ZSDa005_Chr18_gene_82570_mRNA	136
ZSDa006_Chr18_gene_2666200_mRNA	136
ZSDa015_Chr18_gene_272200_mRNA	136
ZSDa018_Chr18_gene_280780_mRNA	136
ZSDa019_Chr18_gene_282500__R0	136
ZSDa022_Chr18_gene_282500_mRNA	136
ZSDa046_Chr18_gene_282640_mRNA	136
ZSDa005_Chr5_gene_158850_mRNA	137
ZSDa006_Chr5_gene_0658700_mRNA	137
ZSDa015_Chr5_gene_127930_mRNA	137
ZSDa018_Chr5_gene_250200_mRNA	137
ZSDa019_Chr5_gene_306480__R0	137
ZSDa022_Chr5_gene_306480_mRNA	137
ZSDa046_Chr5_gene_307150_mRNA	137
ZSDa005_Chr5_gene_157990_mRNA	138
ZSDa006_Chr5_gene_0642700_mRNA	138
ZSDa015_Chr5_gene_128910_mRNA	138
ZSDa018_Chr5_gene_249230_mRNA	138
ZSDa019_Chr5_gene_307400__R0	138
ZSDa022_Chr5_gene_307400_mRNA	138
ZSDa046_Chr5_gene_308060_mRNA	138
ZSDa005_Chr5_gene_158710_mRNA	139
ZSDa006_Chr5_gene_0656400_mRNA	139
ZSDa015_Chr5_gene_128080_mRNA	139
ZSDa018_Chr5_gene_250020_mRNA	139
ZSDa019_Chr5_gene_306650__R0	139
ZSDa022_Chr5_gene_306650_mRNA	139
ZSDa046_Chr5_gene_307300_mRNA	139
ZSDa005_Chr12_gene_233330_mRNA	140
ZSDa006_Chr12_gene_1785200_mRNA	140
ZSDa015_Chr12_gene_75020_mRNA	140
ZSDa018_Chr12_gene_199310_mRNA	140
ZSDa019_Chr12_gene_260840__R0	140
ZSDa022_Chr12_gene_260840_mRNA	140
ZSDa046_Chr12_gene_262340_mRNA	140
ZSDa005_Chr7_gene_189030_mRNA	141
ZSDa006_Chr7_gene_1113100_mRNA	141
ZSDa015_Chr7_gene_290950_mRNA	141
ZSDa018_Chr7_gene_312900_mRNA	141
ZSDa019_Chr7_gene_5410__R0	141
ZSDa022_Chr7_gene_5410_mRNA	141
ZSDa046_Chr7_gene_7360_mRNA	141
ZSDa005_Chr19_gene_241820_mRNA	142
ZSDa006_Chr19_gene_2798300_mRNA	142
ZSDa015_Chr19_gene_137930_mRNA	142
ZSDa018_Chr19_gene_129960_mRNA	142
ZSDa019_Chr19_gene_235040__R0	142
ZSDa022_Chr19_gene_235040_mRNA	142
ZSDa046_Chr19_gene_236760_mRNA	142
ZSDa005_Chr9_gene_34310_mRNA	143
ZSDa006_Chr9_gene_1417400_mRNA	143
ZSDa015_Chr9_gene_329910_mRNA	143
ZSDa018_Chr9_gene_205790_mRNA	143
ZSDa019_Chr9_gene_200080__R0	143
ZSDa022_Chr9_gene_200080_mRNA	143
ZSDa046_Chr9_gene_202990_mRNA	143
ZSDa005_Chr12_gene_227180_mRNA	144
ZSDa006_Chr12_gene_1790800_mRNA	144
ZSDa015_Chr12_gene_80990_mRNA	144
ZSDa018_Chr12_gene_192800_mRNA	144
ZSDa019_Chr12_gene_254160__R0	144
ZSDa022_Chr12_gene_254160_mRNA	144
ZSDa046_Chr12_gene_255630_mRNA	144
ZSDa005_Chr7_gene_198930_mRNA	145
ZSDa006_Chr7_gene_1121000_mRNA	145
ZSDa015_Chr7_gene_280900_mRNA	145
ZSDa018_Chr7_gene_303680_mRNA	145
ZSDa019_Chr7_gene_15020__R0	145
ZSDa022_Chr7_gene_15020_mRNA	145
ZSDa046_Chr7_gene_17480_mRNA	145
ZSDa005_Chr15_gene_268800_mRNA	146
ZSDa006_Chr15_gene_2280300_mRNA	146
ZSDa015_Chr15_gene_155580_mRNA	146
ZSDa018_Chr15_gene_183290_mRNA	146
ZSDa019_Chr15_gene_141190__R0	146
ZSDa022_Chr15_gene_141190_mRNA	146
ZSDa046_Chr15_gene_141130_mRNA	146
ZSDa005_Chr9_gene_28000_mRNA	147
ZSDa006_Chr9_gene_1419100_mRNA	147
ZSDa015_Chr9_gene_336250_mRNA	147
ZSDa018_Chr9_gene_212260_mRNA	147
ZSDa019_Chr9_gene_193830__R0	147
ZSDa022_Chr9_gene_193830_mRNA	147
ZSDa046_Chr9_gene_196680_mRNA	147
ZSDa005_Chr15_gene_275770_mRNA	148
ZSDa006_Chr15_gene_2140700_mRNA	148
ZSDa015_Chr15_gene_162780_mRNA	148
ZSDa018_Chr15_gene_190420_mRNA	148
ZSDa019_Chr15_gene_134090__R0	148
ZSDa022_Chr15_gene_134090_mRNA	148
ZSDa046_Chr15_gene_134160_mRNA	148
ZSDa005_Chr8_gene_133930_mRNA	149
ZSDa006_Chr8_gene_1188400_mRNA	149
ZSDa015_Chr8_gene_55380_mRNA	149
ZSDa018_Chr8_gene_157510_mRNA	149
ZSDa019_Chr8_gene_97530__R0	149
ZSDa022_Chr8_gene_97530_mRNA	149
ZSDa046_Chr8_gene_97410_mRNA	149
ZSDa005_Chr8_gene_135210_mRNA	150
ZSDa006_Chr8_gene_1172100_mRNA	150
ZSDa015_Chr8_gene_56710_mRNA	150
ZSDa018_Chr8_gene_158600_mRNA	150
ZSDa019_Chr8_gene_98710__R0	150
ZSDa022_Chr8_gene_98710_mRNA	150
ZSDa046_Chr8_gene_98520_mRNA	150
ZSDa005_Chr7_gene_206380_mRNA	151
ZSDa006_Chr7_gene_0985700_mRNA	151
ZSDa015_Chr7_gene_288680_mRNA	151
ZSDa018_Chr7_gene_310870_mRNA	151
ZSDa019_Chr7_gene_22170__R0	151
ZSDa022_Chr7_gene_22170_mRNA	151
ZSDa046_Chr7_gene_24720_mRNA	151
ZSDa005_Chr7_gene_200310_mRNA	152
ZSDa006_Chr7_gene_1098900_mRNA	152
ZSDa015_Chr7_gene_282130_mRNA	152
ZSDa018_Chr7_gene_304840_mRNA	152
ZSDa019_Chr7_gene_16200__R0	152
ZSDa022_Chr7_gene_16200_mRNA	152
ZSDa046_Chr7_gene_18610_mRNA	152
ZSDa005_Chr12_gene_232840_mRNA	153
ZSDa006_Chr12_gene_1774800_mRNA	153
ZSDa015_Chr12_gene_75490_mRNA	153
ZSDa018_Chr12_gene_199800_mRNA	153
ZSDa019_Chr12_gene_261350__R0	153
ZSDa022_Chr12_gene_261350_mRNA	153
ZSDa046_Chr12_gene_262840_mRNA	153
ZSDa005_Chr12_gene_232610_mRNA	154
ZSDa006_Chr12_gene_1771100_mRNA	154
ZSDa015_Chr12_gene_75720_mRNA	154
ZSDa018_Chr12_gene_200080_mRNA	154
ZSDa019_Chr12_gene_261590__R0	154
ZSDa022_Chr12_gene_261590_mRNA	154
ZSDa046_Chr12_gene_263050_mRNA	154
ZSDa005_Chr10_gene_45680_mRNA	155
ZSDa006_Chr10_gene_1522500_mRNA	155
ZSDa015_Chr10_gene_239460_mRNA	155
ZSDa018_Chr10_gene_21050_mRNA	155
ZSDa019_Chr10_gene_171820__R0	155
ZSDa022_Chr10_gene_171820_mRNA	155
ZSDa046_Chr10_gene_173990_mRNA	155
ZSDa005_Chr5_gene_91900_mRNA	156
ZSDa006_Chr5_gene_0646100_mRNA	156
ZSDa015_Chr5_gene_115830_mRNA	156
ZSDa018_Chr5_gene_262440_mRNA	156
ZSDa019_Chr5_gene_320600__R0	156
ZSDa022_Chr5_gene_320600_mRNA	156
ZSDa046_Chr5_gene_321460_mRNA	156
ZSDa005_Chr9_gene_26920_mRNA	157
ZSDa006_Chr9_gene_1398300_mRNA	157
ZSDa015_Chr9_gene_337300_mRNA	157
ZSDa018_Chr9_gene_213330_mRNA	157
ZSDa019_Chr9_gene_194870__R0	157
ZSDa022_Chr9_gene_194870_mRNA	157
ZSDa046_Chr9_gene_197770_mRNA	157
ZSDa005_Chr12_gene_226310_mRNA	158
ZSDa006_Chr12_gene_1769400_mRNA	158
ZSDa015_Chr12_gene_81870_mRNA	158
ZSDa018_Chr12_gene_193730_mRNA	158
ZSDa019_Chr12_gene_255060__R0	158
ZSDa022_Chr12_gene_255060_mRNA	158
ZSDa046_Chr12_gene_256490_mRNA	158
ZSDa005_Chr19_gene_239070_mRNA	159
ZSDa006_Chr19_gene_2846400_mRNA	159
ZSDa015_Chr19_gene_135120_mRNA	159
ZSDa018_Chr19_gene_127240_mRNA	159
ZSDa019_Chr19_gene_237770__R0	159
ZSDa022_Chr19_gene_237770_mRNA	159
ZSDa046_Chr19_gene_239530_mRNA	159
ZSDa005_Chr16_gene_278910_mRNA	160
ZSDa006_Chr16_gene_2366200_mRNA	160
ZSDa015_Chr16_gene_70640_mRNA	160
ZSDa018_Chr16_gene_145040_mRNA	160
ZSDa019_Chr16_gene_112590__R0	160
ZSDa022_Chr16_gene_112590_mRNA	160
ZSDa046_Chr16_gene_112280_mRNA	160
ZSDa005_Chr14_gene_176700_mRNA	161
ZSDa006_Chr14_gene_2104100_mRNA	161
ZSDa015_Chr14_gene_96950_mRNA	161
ZSDa018_Chr14_gene_332740_mRNA	161
ZSDa019_Chr14_gene_26380__R0	161
ZSDa022_Chr14_gene_26380_mRNA	161
ZSDa046_Chr14_gene_31350_mRNA	161
ZSDa005_Chr2_gene_145300_mRNA	162
ZSDa006_Chr2_gene_0127800_mRNA	162
ZSDa015_Chr2_gene_12220_mRNA	162
ZSDa018_Chr2_gene_66200_mRNA	162
ZSDa019_Chr2_gene_74680__R0	162
ZSDa022_Chr2_gene_74680_mRNA	162
ZSDa046_Chr2_gene_74680_mRNA	162
ZSDa005_Chr15_gene_270700_mRNA	163
ZSDa006_Chr15_gene_2243900_mRNA	163
ZSDa015_Chr15_gene_157340_mRNA	163
ZSDa018_Chr15_gene_185120_mRNA	163
ZSDa019_Chr15_gene_139460__R0	163
ZSDa022_Chr15_gene_139460_mRNA	163
ZSDa046_Chr15_gene_139370_mRNA	163
ZSDa005_Chr17_gene_61140_mRNA	164
ZSDa006_Chr17_gene_2505800_mRNA	164
ZSDa015_Chr17_gene_315340_mRNA	164
ZSDa018_Chr17_gene_5970_mRNA	164
ZSDa019_Chr17_gene_186680__R0	164
ZSDa022_Chr17_gene_186680_mRNA	164
ZSDa046_Chr17_gene_189800_mRNA	164
ZSDa005_Chr4_gene_5720_mRNA	165
ZSDa006_Chr4_gene_0493400_mRNA	165
ZSDa015_Chr4_gene_188550_mRNA	165
ZSDa018_Chr4_gene_36510_mRNA	165
ZSDa019_Chr4_gene_339250__R0	165
ZSDa022_Chr4_gene_339250_mRNA	165
ZSDa046_Chr4_gene_340160_mRNA	165
ZSDa005_Chr5_gene_162810_mRNA	166
ZSDa006_Chr5_gene_0738200_mRNA	166
ZSDa015_Chr5_gene_124020_mRNA	166
ZSDa018_Chr5_gene_254270_mRNA	166
ZSDa019_Chr5_gene_302420__R0	166
ZSDa022_Chr5_gene_302420_mRNA	166
ZSDa046_Chr5_gene_303010_mRNA	166
ZSDa005_Chr9_gene_28360_mRNA	167
ZSDa006_Chr9_gene_1426700_mRNA	167
ZSDa015_Chr9_gene_335890_mRNA	167
ZSDa018_Chr9_gene_211900_mRNA	167
ZSDa019_Chr9_gene_193470__R0	167
ZSDa022_Chr9_gene_193470_mRNA	167
ZSDa046_Chr9_gene_196320_mRNA	167
ZSDa005_Chr5_gene_168240_mRNA	168
ZSDa006_Chr5_gene_0847300_mRNA	168
ZSDa015_Chr5_gene_118570_mRNA	168
ZSDa018_Chr5_gene_259730_mRNA	168
ZSDa019_Chr5_gene_296940__R0	168
ZSDa022_Chr5_gene_296940_mRNA	168
ZSDa046_Chr5_gene_297500_mRNA	168
ZSDa005_Chr4_gene_20230_mRNA	169
ZSDa006_Chr4_gene_0562500_mRNA	169
ZSDa015_Chr4_gene_174150_mRNA	169
ZSDa018_Chr4_gene_51000_mRNA	169
ZSDa019_Chr4_gene_324820__R0	169
ZSDa022_Chr4_gene_324820_mRNA	169
ZSDa046_Chr4_gene_325980_mRNA	169
ZSDa005_Chr7_gene_198470_mRNA	170
ZSDa006_Chr7_gene_1128500_mRNA	170
ZSDa015_Chr7_gene_280450_mRNA	170
ZSDa018_Chr7_gene_303240_mRNA	170
ZSDa019_Chr7_gene_14580__R0	170
ZSDa022_Chr7_gene_14580_mRNA	170
ZSDa046_Chr7_gene_17000_mRNA	170
ZSDa005_Chr4_gene_11120_mRNA	171
ZSDa006_Chr4_gene_0396900_mRNA	171
ZSDa015_Chr4_gene_183130_mRNA	171
ZSDa018_Chr4_gene_41800_mRNA	171
ZSDa019_Chr4_gene_333900__R0	171
ZSDa022_Chr4_gene_333900_mRNA	171
ZSDa046_Chr4_gene_334830_mRNA	171
ZSDa005_Chr4_gene_11130_mRNA	172
ZSDa006_Chr4_gene_0397000_mRNA	172
ZSDa015_Chr4_gene_183120_mRNA	172
ZSDa018_Chr4_gene_41810_mRNA	172
ZSDa019_Chr4_gene_333890__R0	172
ZSDa022_Chr4_gene_333890_mRNA	172
ZSDa046_Chr4_gene_334820_mRNA	172
ZSDa005_Chr5_gene_98320_mRNA	173
ZSDa006_Chr5_gene_0765000_mRNA	173
ZSDa015_Chr5_gene_109160_mRNA	173
ZSDa018_Chr5_gene_268960_mRNA	173
ZSDa019_Chr5_gene_314100__R0	173
ZSDa022_Chr5_gene_314100_mRNA	173
ZSDa046_Chr5_gene_314870_mRNA	173
ZSDa005_Chr4_gene_2670_mRNA	174
ZSDa006_Chr4_gene_0441000_mRNA	174
ZSDa015_Chr4_gene_191550_mRNA	174
ZSDa018_Chr4_gene_33390_mRNA	174
ZSDa019_Chr4_gene_342350__R0	174
ZSDa022_Chr4_gene_342350_mRNA	174
ZSDa046_Chr4_gene_343120_mRNA	174
ZSDa005_Chr5_gene_166670_mRNA	175
ZSDa006_Chr5_gene_0814000_mRNA	175
ZSDa015_Chr5_gene_120180_mRNA	175
ZSDa018_Chr5_gene_258130_mRNA	175
ZSDa019_Chr5_gene_298560__R0	175
ZSDa022_Chr5_gene_298560_mRNA	175
ZSDa046_Chr5_gene_299120_mRNA	175
ZSDa005_Chr18_gene_72200_mRNA	176
ZSDa006_Chr18_gene_2619500_mRNA	176
ZSDa015_Chr18_gene_266660_mRNA	176
ZSDa018_Chr18_gene_299590_mRNA	176
ZSDa019_Chr18_gene_271560__R0	176
ZSDa022_Chr18_gene_271560_mRNA	176
ZSDa046_Chr18_gene_272380_mRNA	176
ZSDa005_Chr16_gene_278280_mRNA	177
ZSDa006_Chr16_gene_2379100_mRNA	177
ZSDa015_Chr16_gene_71340_mRNA	177
ZSDa018_Chr16_gene_144410_mRNA	177
ZSDa019_Chr16_gene_111780__R0	177
ZSDa022_Chr16_gene_111780_mRNA	177
ZSDa046_Chr16_gene_111620_mRNA	177
ZSDa005_Chr4_gene_8190_mRNA	178
ZSDa006_Chr4_gene_0545200_mRNA	178
ZSDa015_Chr4_gene_186010_mRNA	178
ZSDa018_Chr4_gene_39050_mRNA	178
ZSDa019_Chr4_gene_336730__R0	178
ZSDa022_Chr4_gene_336730_mRNA	178
ZSDa046_Chr4_gene_337670_mRNA	178
ZSDa005_Chr16_gene_288030_mRNA	179
ZSDa006_Chr16_gene_2329400_mRNA	179
ZSDa015_Chr16_gene_60890_mRNA	179
ZSDa018_Chr16_gene_139900_mRNA	179
ZSDa019_Chr16_gene_122090__R0	179
ZSDa022_Chr16_gene_122090_mRNA	179
ZSDa046_Chr16_gene_122000_mRNA	179
ZSDa005_Chr5_gene_89710_mRNA	180
ZSDa006_Chr5_gene_0602600_mRNA	180
ZSDa015_Chr5_gene_118020_mRNA	180
ZSDa018_Chr5_gene_260280_mRNA	180
ZSDa019_Chr5_gene_322770__R0	180
ZSDa022_Chr5_gene_322770_mRNA	180
ZSDa046_Chr5_gene_323660_mRNA	180
ZSDa005_Chr5_gene_89730_mRNA	181
ZSDa006_Chr5_gene_0603000_mRNA	181
ZSDa015_Chr5_gene_118010_mRNA	181
ZSDa018_Chr5_gene_260290_mRNA	181
ZSDa019_Chr5_gene_322750__R0	181
ZSDa022_Chr5_gene_322750_mRNA	181
ZSDa046_Chr5_gene_323650_mRNA	181
ZSDa005_Chr5_gene_102210_mRNA	182
ZSDa006_Chr5_gene_0843800_mRNA	182
ZSDa015_Chr5_gene_105270_mRNA	182
ZSDa018_Chr5_gene_272830_mRNA	182
ZSDa019_Chr5_gene_310140__R0	182
ZSDa022_Chr5_gene_310140_mRNA	182
ZSDa046_Chr5_gene_310920_mRNA	182
ZSDa005_Chr5_gene_168130_mRNA	183
ZSDa006_Chr5_gene_0844700_mRNA	183
ZSDa015_Chr5_gene_118700_mRNA	183
ZSDa018_Chr5_gene_259620_mRNA	183
ZSDa019_Chr5_gene_297070__R0	183
ZSDa022_Chr5_gene_297070_mRNA	183
ZSDa046_Chr5_gene_297610_mRNA	183
ZSDa005_Chr17_gene_63740_mRNA	184
ZSDa006_Chr17_gene_2463900_mRNA	184
ZSDa015_Chr17_gene_318020_mRNA	184
ZSDa018_Chr17_gene_3350_mRNA	184
ZSDa019_Chr17_gene_189490__R0	184
ZSDa022_Chr17_gene_189490_mRNA	184
ZSDa046_Chr17_gene_192290_mRNA	184
ZSDa005_Chr14_gene_180150_mRNA	185
ZSDa006_Chr14_gene_1995800_mRNA	185
ZSDa015_Chr14_gene_93230_mRNA	185
ZSDa018_Chr14_gene_329180_mRNA	185
ZSDa019_Chr14_gene_57810__R0	185
ZSDa022_Chr14_gene_57810_mRNA	185
ZSDa046_Chr14_gene_59200_mRNA	185
ZSDa005_Chr17_gene_56620_mRNA	186
ZSDa006_Chr17_gene_2445700_mRNA	186
ZSDa015_Chr17_gene_326080_mRNA	186
ZSDa018_Chr17_gene_10320_mRNA	186
ZSDa019_Chr17_gene_182340__R0	186
ZSDa022_Chr17_gene_182340_mRNA	186
ZSDa046_Chr17_gene_185420_mRNA	186
ZSDa005_Chr17_gene_56600_mRNA	187
ZSDa006_Chr17_gene_2445900_mRNA	187
ZSDa015_Chr17_gene_326060_mRNA	187
ZSDa018_Chr17_gene_10340_mRNA	187
ZSDa019_Chr17_gene_182320__R0	187
ZSDa022_Chr17_gene_182320_mRNA	187
ZSDa046_Chr17_gene_185400_mRNA	187
ZSDa005_Chr17_gene_56610_mRNA	188
ZSDa006_Chr17_gene_2445800_mRNA	188
ZSDa015_Chr17_gene_326070_mRNA	188
ZSDa018_Chr17_gene_10330_mRNA	188
ZSDa019_Chr17_gene_182330__R0	188
ZSDa022_Chr17_gene_182330_mRNA	188
ZSDa046_Chr17_gene_185410_mRNA	188
ZSDa005_Chr17_gene_64930_mRNA	189
ZSDa006_Chr17_gene_2445600_mRNA	189
ZSDa015_Chr17_gene_319200_mRNA	189
ZSDa018_Chr17_gene_2170_mRNA	189
ZSDa019_Chr17_gene_190600__R0	189
ZSDa022_Chr17_gene_190600_mRNA	189
ZSDa046_Chr17_gene_193430_mRNA	189
ZSDa005_Chr17_gene_56640_mRNA	190
ZSDa006_Chr17_gene_2445100_mRNA	190
ZSDa015_Chr17_gene_326090_mRNA	190
ZSDa018_Chr17_gene_10290_mRNA	190
ZSDa019_Chr17_gene_182360__R0	190
ZSDa022_Chr17_gene_182360_mRNA	190
ZSDa046_Chr17_gene_185440_mRNA	190
ZSDa005_Chr17_gene_64940_mRNA	191
ZSDa006_Chr17_gene_2445500_mRNA	191
ZSDa015_Chr17_gene_319210_mRNA	191
ZSDa018_Chr17_gene_2160_mRNA	191
ZSDa019_Chr17_gene_190620__R0	191
ZSDa022_Chr17_gene_190620_mRNA	191
ZSDa046_Chr17_gene_193440_mRNA	191
ZSDa005_Chr20_gene_107660_mRNA	192
ZSDa006_Chr20_gene_2991700_mRNA	192
ZSDa015_Chr20_gene_210660_mRNA	192
ZSDa018_Chr20_gene_290640_mRNA	192
ZSDa019_Chr20_gene_69590__R0	192
ZSDa022_Chr20_gene_69590_mRNA	192
ZSDa046_Chr20_gene_69760_mRNA	192
ZSDa005_Chr17_gene_58990_mRNA	193
ZSDa006_Chr17_gene_2406800_mRNA	193
ZSDa015_Chr17_gene_328340_mRNA	193
ZSDa018_Chr17_gene_7970_mRNA	193
ZSDa019_Chr17_gene_184680__R0	193
ZSDa022_Chr17_gene_184680_mRNA	193
ZSDa046_Chr17_gene_187740_mRNA	193
ZSDa005_Chr4_gene_7240_mRNA	194
ZSDa006_Chr4_gene_0524500_mRNA	194
ZSDa015_Chr4_gene_186970_mRNA	194
ZSDa018_Chr4_gene_38080_mRNA	194
ZSDa019_Chr4_gene_337690__R0	194
ZSDa022_Chr4_gene_337690_mRNA	194
ZSDa046_Chr4_gene_338610_mRNA	194
ZSDa005_Chr18_gene_70230_mRNA	195
ZSDa006_Chr18_gene_2587100_mRNA	195
ZSDa015_Chr18_gene_268650_mRNA	195
ZSDa018_Chr18_gene_297550_mRNA	195
ZSDa019_Chr18_gene_269470__R0	195
ZSDa022_Chr18_gene_269470_mRNA	195
ZSDa046_Chr18_gene_270350_mRNA	195
ZSDa005_Chr10_gene_39760_mRNA	196
ZSDa006_Chr10_gene_1545200_mRNA	196
ZSDa015_Chr10_gene_245480_mRNA	196
ZSDa018_Chr10_gene_26890_mRNA	196
ZSDa019_Chr10_gene_209390__R0	196
ZSDa022_Chr10_gene_209390_mRNA	196
ZSDa046_Chr10_gene_212000_mRNA	196
ZSDa005_Chr9_gene_28420_mRNA	197
ZSDa006_Chr9_gene_1428200_mRNA	197
ZSDa015_Chr9_gene_335840_mRNA	197
ZSDa018_Chr9_gene_211850_mRNA	197
ZSDa019_Chr9_gene_193410__R0	197
ZSDa022_Chr9_gene_193410_mRNA	197
ZSDa046_Chr9_gene_196260_mRNA	197
ZSDa005_Chr7_gene_187560_mRNA	198
ZSDa006_Chr7_gene_1135000_mRNA	198
ZSDa015_Chr7_gene_289670_mRNA	198
ZSDa018_Chr7_gene_311810_mRNA	198
ZSDa019_Chr7_gene_4290__R0	198
ZSDa022_Chr7_gene_4290_mRNA	198
ZSDa046_Chr7_gene_6220_mRNA	198
ZSDa005_Chr12_gene_227930_mRNA	199
ZSDa006_Chr12_gene_1806400_mRNA	199
ZSDa015_Chr12_gene_80200_mRNA	199
ZSDa018_Chr12_gene_192060_mRNA	199
ZSDa019_Chr12_gene_253430__R0	199
ZSDa022_Chr12_gene_253430_mRNA	199
ZSDa046_Chr12_gene_254890_mRNA	199
ZSDa005_Chr7_gene_187570_mRNA	200
ZSDa006_Chr7_gene_1134900_mRNA	200
ZSDa015_Chr7_gene_289680_mRNA	200
ZSDa018_Chr7_gene_311820_mRNA	200
ZSDa019_Chr7_gene_4300__R0	200
ZSDa022_Chr7_gene_4300_mRNA	200
ZSDa046_Chr7_gene_6230_mRNA	200
ZSDa005_Chr15_gene_260310_mRNA	201
ZSDa006_Chr15_gene_2275300_mRNA	201
ZSDa015_Chr15_gene_163670_mRNA	201
ZSDa018_Chr15_gene_174930_mRNA	201
ZSDa019_Chr15_gene_133200__R0	201
ZSDa022_Chr15_gene_133200_mRNA	201
ZSDa046_Chr15_gene_133280_mRNA	201
ZSDa005_Chr8_gene_117070_mRNA	202
ZSDa006_Chr8_gene_1318000_mRNA	202
ZSDa015_Chr8_gene_22230_mRNA	202
ZSDa018_Chr8_gene_88070_mRNA	202
ZSDa019_Chr8_gene_100500__R0	202
ZSDa022_Chr8_gene_100500_mRNA	202
ZSDa046_Chr8_gene_100610_mRNA	202
ZSDa005_Chr8_gene_127260_mRNA	203
ZSDa006_Chr8_gene_1317100_mRNA	203
ZSDa015_Chr8_gene_48200_mRNA	203
ZSDa018_Chr8_gene_151140_mRNA	203
ZSDa019_Chr8_gene_91100__R0	203
ZSDa022_Chr8_gene_91100_mRNA	203
ZSDa046_Chr8_gene_90890_mRNA	203
ZSDa005_Chr8_gene_127220_mRNA	204
ZSDa006_Chr8_gene_1317400_mRNA	204
ZSDa015_Chr8_gene_48170_mRNA	204
ZSDa018_Chr8_gene_151120_mRNA	204
ZSDa019_Chr8_gene_91070__R0	204
ZSDa022_Chr8_gene_91070_mRNA	204
ZSDa046_Chr8_gene_90860_mRNA	204
ZSDa005_Chr8_gene_127250_mRNA	205
ZSDa006_Chr8_gene_1317200_mRNA	205
ZSDa015_Chr8_gene_48190_mRNA	205
ZSDa018_Chr8_gene_151130_mRNA	205
ZSDa019_Chr8_gene_91070__R1	205
ZSDa022_Chr8_gene_91090_mRNA	205
ZSDa046_Chr8_gene_90870_mRNA	205
ZSDa005_Chr15_gene_260340_mRNA	206
ZSDa006_Chr15_gene_2275000_mRNA	206
ZSDa015_Chr15_gene_163740_mRNA	206
ZSDa018_Chr15_gene_175000_mRNA	206
ZSDa019_Chr15_gene_133170__R0	206
ZSDa022_Chr15_gene_133170_mRNA	206
ZSDa046_Chr15_gene_133220_mRNA	206
ZSDa005_Chr8_gene_127190_mRNA	207
ZSDa006_Chr8_gene_1317800_mRNA	207
ZSDa015_Chr8_gene_48160_mRNA	207
ZSDa018_Chr8_gene_151100_mRNA	207
ZSDa019_Chr8_gene_91050__R0	207
ZSDa022_Chr8_gene_91050_mRNA	207
ZSDa046_Chr8_gene_90820_mRNA	207
ZSDa005_Chr15_gene_269170_mRNA	208
ZSDa006_Chr15_gene_2274700_mRNA	208
ZSDa015_Chr15_gene_155920_mRNA	208
ZSDa018_Chr15_gene_183720_mRNA	208
ZSDa019_Chr15_gene_140830__R0	208
ZSDa022_Chr15_gene_140830_mRNA	208
ZSDa046_Chr15_gene_140780_mRNA	208
ZSDa005_Chr15_gene_269190_mRNA	209
ZSDa006_Chr15_gene_2274500_mRNA	209
ZSDa015_Chr15_gene_155940_mRNA	209
ZSDa018_Chr15_gene_183750_mRNA	209
ZSDa019_Chr15_gene_140800__R0	209
ZSDa022_Chr15_gene_140800_mRNA	209
ZSDa046_Chr15_gene_140760_mRNA	209
ZSDa005_Chr8_gene_130510_mRNA	210
ZSDa006_Chr8_gene_1251900_mRNA	210
[truncated: 2,120 more rows]

## Sheet: TableS4
OG	Ka	Ks
1	0	0
2	0	0
3	0	0
4	0	0
5	0	0
6	1.00505	0.981999
7	0	0
8	1.00572	0.98184
9	0	0
10	0	0
11	0.996668	1.01277
12	0.987557	1.04371
13	0	0
14	0	0
15	0	0
16	0.0603577	0.12105
17	1.00967	0.963712
18	1.05548	0.822457
19	0.0688885	0.094177
20	0.99858	1.00535
21	0	0
22	0	0
23	0	0
24	0	0
25	0.994483	1.02125
26	0.975833	1.08315
27	0	0
28	0	0
29	0.136011	0.292455
30	1.00719	0.974047
31	0.974575	1.0939
32	0	0
33	0	0
34	0	0
35	1.00816	0.972383
36	0	0
37	0	0
38	1.00298	0.988313
39	0.952168	1.16971
40	0	0
41	1.01914	0.931524
42	0	0
43	1.024	0.917186
44	0.0640283	0.112042
45	0	0
46	0.967237	1.11674
47	0.0437789	0.0638454
48	0	0
49	0.999989	1.00004
50	0.968754	1.11546
51	0	0
52	0	0
53	0	0
54	0	0
55	0	0
56	0.987396	1.05434
57	0.0404457	0.0750945
58	0	0
59	0.972573	1.09889
60	1.01108	0.963436
61	1.01931	0.938526
62	0	0
63	0	0
64	1.00978	0.96202
65	0	0
66	0	0
67	0	0
68	0.971354	1.11608
69	0.989201	1.03685
70	1.03591	0.872298
71	1.042	0.871509
72	0	0
73	0.993693	1.02275
74	0.979664	1.08162
75	1.02649	0.904773
76	0.987638	1.04288
77	0.0940378	0.29993
78	0	0
79	0.970877	1.11196
80	0	0
81	0	0
82	0	0
83	0.997164	1.01146
84	0.988263	1.0402
85	0.952154	1.19248
86	0.986694	1.04625
87	1.00036	0.998659
88	0.998701	1.00368
89	1.00124	0.996448
90	0	0
91	0	0
92	1.00082	0.996988
93	0	0
94	1.0373	0.851352
95	0.964797	1.13405
96	0.992362	1.02521
97	0	0
98	0	0
99	0.995014	1.01651
100	0	0
101	1.00558	0.980828
102	0	0
103	1.03829	0.882707
104	0	0
105	0.047229	0.0771499
106	0	0
107	0	0
108	0	0
109	0	0
110	0.994029	1.02042
111	0	0
112	1.04532	0.850049
113	0	0
114	1.01296	0.955998
115	0	0
116	0	0
117	0	0
118	1.00742	0.975817
119	0	0
120	0	0
121	0	0
122	0	0
123	0	0
124	0	0
125	1.01857	0.931422
126	0	0
127	1.00456	0.982327
128	0	0
129	0.997776	1.00785
130	1.00015	0.999409
131	0.981928	1.0691
132	0	0
133	0	0
134	0.96203	1.14096
135	0.972426	1.10241
136	1.00893	0.96647
137	0	0
138	0	0
139	0.996238	1.012
140	0	0
141	0	0
142	0	0
143	1.00369	0.984708
144	0	0
145	0	0
146	0	0
147	1.02974	0.900399
148	0	0
149	0	0
150	0	0
151	1.00143	0.99505
152	0.939067	1.36135
153	1.00008	0.999718
154	0	0
155	0	0
156	0	0
157	0	0
158	0	0
159	0	0
160	0	0
161	0	0
162	0	0
163	0.942853	1.22688
164	1.044	0.842413
165	0	0
166	1.0213	0.92032
167	0.971865	1.09997
168	0	0
169	0	0
170	0.986691	1.05073
171	0.96435	1.1227
172	0.975155	1.09055
173	0.978828	1.06799
174	1.00198	0.992904
175	0.982738	1.05853
176	0	0
177	0	0
178	0.978031	1.07666
179	0	0
180	1.01001	0.966776
181	0.99588	1.01367
182	1.03449	0.877359
183	0	0
184	0.967351	1.12587
185	0	0
186	0	0
187	0	0
188	0.995712	1.01744
189	0.9862	1.05317
190	0.980443	1.07536
191	0	0
192	1.02338	0.923944
193	1.02766	0.911998
194	0.997686	1.00814
195	0	0
196	0	0
197	0	0
198	0.986648	1.04692
199	0	0
200	1.00245	0.989736
201	0	0
202	1.03771	0.880744
203	0.999371	1.00266
204	0	0
205	0	0
206	1.01079	0.962418
207	0.989781	1.03457
208	1.0013	0.994954
209	0.991131	1.03244
210	0.999643	1.00122
211	0.996762	1.01134
212	0	0
213	0	0
214	0	0
215	0.98572	1.05242
216	0	0
217	0	0
218	0.113254	0.239757
219	1.00818	0.972065
220	0	0
221	0	0
222	0.998354	1.00578
223	0	0
224	0	0
225	0	0
226	0	0
227	0	0
228	0.977241	1.08974
229	0	0
230	0	0
231	0	0
232	0.947601	1.18009
233	0	0
234	0	0
235	0	0
236	0.95821	1.14991
237	1.0332	0.891603
238	0	0
239	0.998214	1.00593
240	0	0
241	0.948708	1.19905
242	0.9652	1.11501
243	0	0
244	0.991251	1.03325
245	0	0
246	1.02448	0.916761
247	1.04436	0.868729
248	0	0
249	0.966108	1.11472
250	0	0
251	0	0
252	1.02419	0.915343
253	0	0
254	1.04347	0.875028
255	0	0
256	0	0
257	0	0
258	1.04848	0.858188
259	0.991976	1.0272
260	0	0
261	0	0
262	0	0
263	0	0
264	0.958084	1.15199
265	0	0
266	1.0159	0.947535
267	1.0426	0.862061
268	1.03894	0.868525
269	0	0
270	0	0
271	0	0
272	0.94023	1.24364
273	0	0
274	0.985314	1.04814
275	0	0
276	0	0
277	0	0
278	0	0
279	1.0334	0.884914
280	1.03147	0.911987
281	0	0
282	0	0
283	0.969512	1.10761
284	0	0
285	0.993326	1.02611
286	1.04651	0.845403
287	0.986149	1.04583
288	1.01677	0.944539
289	0.995431	1.01559
290	0	0
291	0	0
292	0	0
293	0	0
294	0	0
295	0	0
296	1.00937	0.968739
297	0.962124	1.13038
298	0	0
299	0	0
300	0	0
301	0.97578	1.09153
302	0.0092711	0.00599422
303	1.01843	0.933509
304	1.00853	0.965445
305	0.979347	1.07499
306	0	0
307	1.01325	0.950809
308	1.00206	0.993365
309	0	0
310	0.99691	1.0101
311	0.987031	1.0434
312	0	0
313	1.01753	0.942314
314	0	0
315	0.964259	1.11895
316	1.03967	0.865055
317	0	0
318	0.996256	1.01319
319	0.939657	1.24081
320	0	0
321	0.983604	1.0548
322	0	0
323	1.04104	0.851575
324	0	0
325	0.963931	1.12555
326	0	0
327	0.980841	1.08178
328	0.99092	1.03733
329	0.998108	1.00668
330	1.00441	0.984917
331	1.03302	0.889503
332	0	0
333	0	0
334	1.02441	0.926174
335	0	0
336	0	0
337	0	0
338	1.00704	0.975008
339	0	0
340	0.982088	1.05967
341	1.05862	0.821211
342	0	0
343	1.038	0.875424
344	1.01647	0.945131
345	1.02914	0.899283
346	0.973397	1.09547
347	1.00904	0.9684
348	0	0
349	0	0
350	0	0
351	0.973318	1.08846
352	0	0
353	0	0
354	0	0
355	0	0
356	0	0
357	1.0224	0.929597
358	0.999863	1.00048
359	0	0
360	1.00756	0.975483
361	1.05534	0.817958
362	0	0
363	1.04656	0.850095
364	0	0
365	1.0129	0.960657
366	0.98914	1.03582
367	0	0
368	0	0
369	0	0
370	0	0
371	0	0
372	0.998548	1.0047
373	1.03605	0.880796
374	0	0
375	1.02452	0.932395
376	1.02665	0.914616
377	0	0
378	0	0
379	0	0
380	1.01574	0.9508
381	1.01307	0.957846
382	0	0
383	1.00318	0.989575
384	1.01049	0.968819
385	0	0
386	1.04753	0.843948
387	1.02567	0.915238
388	1.02462	0.921348
389	0	0
390	0	0
391	0	0
392	0	0
393	1.01427	0.945897
394	0	0
395	0.984198	1.05486
396	1.00314	0.989075
397	0	0
398	1.02267	0.923247
399	0	0
400	0.978909	1.07141
401	0	0
402	0.973349	1.08656
403	1.02606	0.915145
404	0	0
405	1.03483	0.895382
406	1.02349	0.932555
407	0	0
408	0	0
409	1.01584	0.953088
410	0.990606	1.03255
411	0.979571	1.06852
412	0	0
413	1.01399	0.954366
414	0	0
415	0	0
416	0	0
417	0	0
418	0.962674	1.12008
419	0	0
420	0	0
421	0.979759	1.06299
422	0.987362	1.04004
423	0	0
424	0	0
425	1.0426	0.87444
426	0	0
427	0.994115	1.0202
428	0	0
429	0	0
430	0	0
431	0.9951	1.01626
432	1.01996	0.938722
433	1.01375	0.950492
434	1.01897	0.933906
435	0.964634	1.10475
436	0	0
437	0	0
438	1.02722	0.907741
439	0.97252	1.09782
440	0	0
441	1.00067	0.99771
442	0	0
443	0.996267	1.01128
444	0	0
445	1.01603	0.947193
446	0	0
447	0	0
448	1.016	0.9467
449	0.000804326	0.00320523
450	0	0
451	0.00668069	0.00407498
452	0.0157737	0.0353097
453	0.0854003	0.262965
454	0.0134189	0.026618
455	0.00266213	0.00338819
456	0.00171816	0.00693107
457	0.000940138	0.00740336
458	0.0119452	0.0226919
459	0.000457416	0.00493065
460	0.00771453	0.024807
461	0.000960858	0.00452155
462	0.0132502	0.0315223
463	0.00291969	0.00682683
464	0.00753575	0.0107253
465	0.0190327	0.0330082
466	0.00118589	0.000829829
467	0.0135501	0.0177683
468	0	0
469	0.00481021	0.0260641
470	0.0400961	0.0725332
471	1.50482e-05	0.0150482
472	1.00959	0.966196
473	0	0
474	0	0
475	0	0
476	1.01859	0.926749
477	0.0319214	0.0681865
478	0	0
479	0	0
480	0	0
481	0	0
482	0	0
483	0.0236074	0.0405228
484	0.97028	1.11701
485	0.0160543	0.0666412
486	0	0
487	0.0163017	0.031573
488	0.188382	0.528188
489	0.0312712	0.0416416
490	0.00576165	0.035338
491	0.0152097	0.0368365
492	0.00600379	0.00331951
493	0.0160141	0.0361261
